# Supplementary material for: Chlorination of phenylallene derivatives with 1-chloro-1,2-benziodoxol-3-one: synthesis of vicinal-dichlorides and chlorodienes
Source: publisher site journal article supplement (doi:10.3762/bjoc.14.67), 2018-04-09

# Supporting Information

for

## Chlorination of phenylallene derivatives with 1-chloro-1,2-benziodoxol-3-one: synthesis of *vicinal*-dichlorides and chlorodienes

Zhensheng Zhao and Graham K. Murphy\*

Address: Department of Chemistry, University of Waterloo, 200 University Ave. W.,  
Waterloo, N2L3G1, ON, Canada

Email: Graham Murphy - graham.murphy@uwaterloo.ca

\* Corresponding author

### Experimental and characterization details, and NMR spectra of compounds

#### Table of Contents

|                                                                                                                       |     |
|-----------------------------------------------------------------------------------------------------------------------|-----|
| <b><u>General experimental and characterization details:</u></b> .....                                                | S2  |
| <b><u>General procedure for allene synthesis:</u></b> .....                                                           | S2  |
| <b><u>Characterization data for allenes 2a–v:</u></b> .....                                                           | S3  |
| <b><u>General procedure for chlorination of allenes:</u></b> .....                                                    | S11 |
| <b><u>Characterization data for chlorination:</u></b> .....                                                           | S12 |
| <b><u>Synthesis of 4-(propa-1,2-dien-1-yl-3,3-d<sub>2</sub>)-1,1'-biphenyl ([D<sub>2</sub>]-2b):</u></b> .....        | S18 |
| <b><u>Synthesis of 4-(2,3-dichloroprop-1-en-1-yl-3,3-d<sub>2</sub>)-1,1'-biphenyl ([D<sub>2</sub>]-3b):</u></b> ..... | S19 |
| <b><u><sup>1</sup>H NMR, <sup>19</sup>F and <sup>13</sup>C NMR spectra:</u></b> .....                                 | S20 |

### General experimental and characterization details:

Reactions were carried out in oven-dried glassware under a nitrogen atmosphere. Solvents were dried and purified using a JC Meyer solvent purification system, and were used without further purification. Transfer of anhydrous solvents and reagents was accomplished with oven-dried syringes. Thin-layer chromatography was performed on glass plates pre-coated with 0.25 mm silica gel 60 F254 (Silicycle). Flash chromatography columns were packed with 230–400 mesh silica gel (Silicycle). Radial chromatography was carried out on a Chromatotron 7924T (Harrison Research) equipped with 4 mm silica gel 60 F254 with gypsum binder (EM) thick-layer plates on glass rotors. Infrared spectra were recorded on a Perkin Elmer FT-IR Spectrum Two with ATR Two. Proton NMR spectra ( $^1\text{H}$  NMR) were recorded at 300 or 500 MHz, and are reported (ppm) relative to the residual chloroform peak (7.26 ppm), and coupling constants ( $J$ ) are reported in hertz (Hz). Carbon NMR spectra ( $^{13}\text{C}$  NMR) were recorded at 125 or 75 MHz and are reported (ppm) relative to the center line of the triplet from  $\text{CDCl}_3$  (77.16 ppm). High resolution mass spectroscopy was performed on a Thermo Fisher Scientific Q-Exactive hybrid mass spectrometer equipped with an Agilent HPLC pump interfaced with the Q-Exactive's APCI source.

### General procedure for allene synthesis: <sup>1</sup>

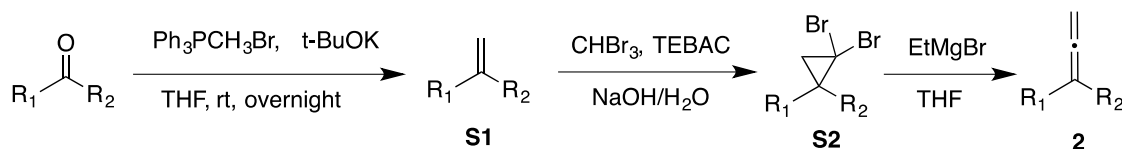

Step 1: In an oven dried flask, was added methyl triphenylphosphonium bromide (1.2 equiv) followed by THF (2.5 mL/mmol). Then  $t\text{-BuOK}$  (1.2 equiv) was added and the resulting yellow suspension was stirred at room temperature for 60 min. To this suspension, a solution of ketone or aldehyde (1.0 equiv) was added in one portion and the resulting mixture was further stirred at room temperature overnight. Water and DCM were added to the reaction mixture, and the aqueous phase was extracted with DCM ( $3 \times 50$  mL). The combined organic phases were washed with saturated NaCl solution, dried over  $\text{Na}_2\text{SO}_4$  and the solvent removed under reduced pressure. The reaction mixture was purified by column chromatography over silica gel (200–300 mesh) using hexanes as eluent afforded **S1**.

Step 2: To a solution of alkene **S1** (1.0 equiv), bromoform (1.5 equiv) and  $\text{BnNEt}_3\text{Cl}$  (1 mol %) was added dropwise a solution of 50% NaOH (4.0 equiv), and the mixture was stirred at room temperature for 60 min, then heated to 60 °C and further stirred until conversion was complete as observed by TLC analysis. Water and DCM were added and the aqueous phase was extracted with DCM ( $3 \times 50$  mL). The combined organic phases were washed with saturated NaCl solution, dried over  $\text{Na}_2\text{SO}_4$  and the solvent removed under reduced pressure. The reaction mixture was purified by column chromatography afforded **S2**.

Step3:  $\text{EtMgBr}$  (3.0 M in ether, 1.5 equiv) was added dropwise to a pre-cooled (ice-bath) solution of **S2** (1.0 equiv) in dry THF (1.0 mL/mmol) under nitrogen atmosphere. After  $\text{EtMgBr}$  was added the mixture was then slowly warmed to room temperature, and stirred at room temperature for an additional 2 hours. Then the reaction was quenched by HCl (0.5 N, 10 mL) solution, water was added, and the mixture extracted with ether ( $3 \times 50$  mL). The combined organic layers were washed with brine, dried with anhydrous  $\text{Na}_2\text{SO}_4$  and filtered. After removing the solvent under reduced pressure, the crude product was purified by column chromatography on silica gel to afford allenes **2a–v**.

### Characterization data for allenes 2a–v:

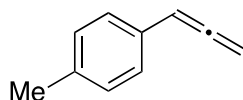

**1-Methyl-4-(propa-1,2-dien-1-yl)benzene (2a):** Obtained as a colorless liquid in 95% yield. Compound purified by silica gel column chromatography eluting with Hexanes.  $R_f=0.7$  (Hexanes).  $^1\text{H}$  NMR (300 MHz,  $\text{CDCl}_3$ )  $\delta$  7.27 (d,  $J = 8.0$  Hz, 2H), 7.18 (d,  $J = 8.0$  Hz, 2H), 6.22 (t,  $J = 6.8$  Hz, 1H), 5.19 (d,  $J = 6.8$  Hz, 2H), 2.40 (s, 3H).  $^{13}\text{C}$  NMR (75 MHz,  $\text{CDCl}_3$ )  $\delta$  209.6, 136.6, 130.9, 129.3, 126.6, 93.7, 78.6, 21.1.

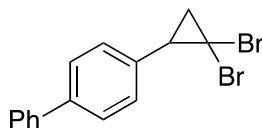

**4-(2,2-Dibromocyclopropyl)-1,1'-biphenyl (S2-b):** Obtained as a colorless liquid in 36% yield. Compound purified by silica gel column chromatography eluting with Hexanes.  $R_f=0.3$  (Hexanes).  $^1\text{H}$  NMR (300 MHz,  $\text{CDCl}_3$ )  $\delta$  7.61 – 7.56 (m, 4H), 7.46 – 7.40 (m, 2H), 7.37 – 7.30 (m, 3H), 2.98 (t,  $J = 9.4$  Hz, 1H), 2.19 – 2.13 (m, 1H), 2.08 – 2.00 (m, 1H).  $^{13}\text{C}$  NMR (75 MHz,  $\text{CDCl}_3$ )  $\delta$  140.4, 140.3, 134.9, 129.2, 128.7, 127.3, 126.9, 126.8, 35.6, 28.4, 27.3.

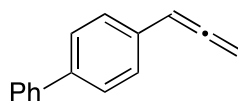

**4-(Propa-1,2-dien-1-yl)-1,1'-biphenyl (2b):**<sup>2</sup> Obtained as a yellow solid in 99% yield. Compound purified by silica gel column chromatography eluting with Hexanes.  $R_f=0.45$  (Hexanes).  $^1\text{H}$  NMR (300 MHz,  $\text{CDCl}_3$ )  $\delta$  7.59 (d,  $J = 7.3$  Hz, 2H), 7.55 (d,  $J = 8.2$  Hz, 2H), 7.43 (t,  $J = 7.5$  Hz, 2H), 7.38 – 7.31 (m, 3H), 6.21 (t,  $J = 6.8$  Hz, 1H), 5.18 (d,  $J = 6.8$  Hz, 2H).  $^{13}\text{C}$  NMR (75 MHz,  $\text{CDCl}_3$ )  $\delta$  209.9, 140.7, 139.6, 132.9, 128.7, 127.2, 127.1, 127.0, 126.8, 93.5, 78.8.

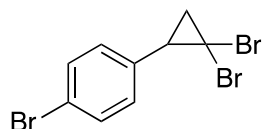

**1-Bromo-4-(2,2-dibromocyclopropyl)benzene (S2-c):** Obtained as a colorless liquid in 80% yield. Compound purified by silica gel column chromatography eluting with Hexanes.  $R_f=0.4$  (Hexanes).  $^1\text{H}$  NMR (300 MHz,  $\text{CDCl}_3$ )  $\delta$  7.47 (d,  $J = 8.4$  Hz, 2H), 7.11 (d,  $J = 8.4$  Hz, 2H), 2.98 – 2.82 (m, 1H), 2.13 (dd,  $J = 9.8$ , 7.2 Hz, 1H), 1.96 (t,  $J = 8.1$  Hz, 1H).  $^{13}\text{C}$  NMR (75 MHz,  $\text{CDCl}_3$ )  $\delta$  135.0, 131.4, 130.6, 121.6, 35.3, 27.8, 27.4.

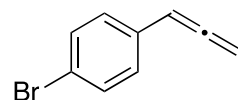

**1-Bromo-4-(propa-1,2-dien-1-yl)benzene (2c):**<sup>3</sup> Obtained as a colorless liquid in 71% yield. Compound purified by silica gel column chromatography eluting with Hexanes.  $R_f=0.55$  (Hexanes).  $^1\text{H}$  NMR (500 MHz,  $\text{CDCl}_3$ )  $\delta$  7.44 (d,  $J = 8.4$  Hz, 2H), 7.20 – 7.14 (m, 2H), 6.12 (t,  $J = 6.8$  Hz, 1H), 5.17 (d,  $J = 6.8$  Hz, 2H).  $^{13}\text{C}$  NMR (126 MHz,  $\text{CDCl}_3$ )  $\delta$  210.5, 133.7, 132.4, 128.9, 121.2, 93.9, 80.0.

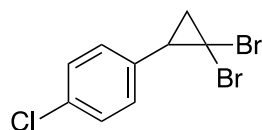

**1-Chloro-4-(2,2-dibromocyclopropyl)benzene (S2-d):** Obtained as a colorless liquid in 74% yield. Compound purified by silica gel column chromatography eluting with Hexanes.  $R_f=0.6$  (Hexanes).  $^1\text{H}$  NMR (300 MHz,  $\text{CDCl}_3$ )  $\delta$  7.32 (d,  $J = 8.5$  Hz, 2H), 7.17 (d,  $J = 8.3$  Hz, 2H), 2.90 (dd,  $J = 10.3$ , 8.4 Hz, 1H), 2.14

(dd,  $J = 10.5, 7.8$  Hz, 1H), 1.96 (t,  $J = 8.0$  Hz, 1H).  $^{13}\text{C}$  NMR (75 MHz,  $\text{CDCl}_3$ )  $\delta$  134.5, 133.5, 130.2, 128.5, 77.0, 35.3, 27.8, 27.4.

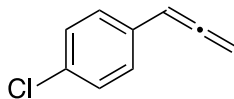

**1-Chloro-4-(propa-1,2-dien-1-yl)benzene (2d):**<sup>4</sup> Obtained as a colorless liquid in 73% yield. Compound purified by silica gel column chromatography eluting with Hexanes.  $R_f=0.7$  (Hexanes).  $^1\text{H}$  NMR (300 MHz,  $\text{CDCl}_3$ )  $\delta$  7.27 (d,  $J = 8.5$  Hz, 2H), 7.21 (d,  $J = 8.4$  Hz, 2H), 6.12 (t,  $J = 6.8$  Hz, 1H), 5.15 (d,  $J = 6.8$  Hz, 2H).  $^{13}\text{C}$  NMR (75 MHz,  $\text{CDCl}_3$ )  $\delta$  209.7, 132.4, 132.4, 128.6, 127.8, 93.0, 79.1.

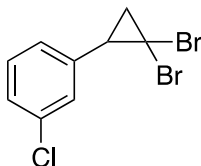

**1-Chloro-3-(2,2-dibromocyclopropyl)benzene (S2-e):** Obtained as a colorless liquid in 85% yield. Compound purified by silica gel column chromatography eluting with Hexanes.  $R_f=0.55$  (Hexanes).  $^1\text{H}$  NMR (300 MHz,  $\text{CDCl}_3$ )  $\delta$  7.29 (d,  $J = 4.9$  Hz, 2H), 7.24 (s, 1H), 7.18 – 7.11 (m, 1H), 3.02 – 2.85 (m, 1H), 2.15 (dd,  $J = 10.4, 7.9$  Hz, 1H), 1.99 (t,  $J = 8.1$  Hz, 1H).  $^{13}\text{C}$  NMR (75 MHz,  $\text{CDCl}_3$ )  $\delta$  138.0, 134.2, 129.6, 129.1, 127.9, 127.2, 35.5, 27.5, 27.4.

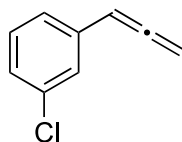

**1-Chloro-3-(propa-1,2-dien-1-yl)benzene (2e):**<sup>3</sup> Obtained as a colorless liquid in 75% yield. Compound purified by silica gel column chromatography eluting with Hexanes.  $R_f=0.7$  (Hexanes).  $^1\text{H}$  NMR (300 MHz,  $\text{CDCl}_3$ )  $\delta$  7.32 (s, 1H), 7.26 – 7.15 (m, 3H), 6.12 (t,  $J = 6.7$  Hz, 1H), 5.20 (d,  $J = 6.7$  Hz, 2H).  $^{13}\text{C}$  NMR (75 MHz,  $\text{CDCl}_3$ )  $\delta$  209.9, 135.9, 134.5, 129.7, 126.8, 126.5, 124.8, 93.1, 79.2.

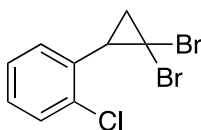

**1-Chloro-2-(2,2-dibromocyclopropyl)benzene (S2-f):** Obtained as a colorless liquid in 95% yield. Compound purified by silica gel column chromatography eluting with Hexanes.  $R_f=0.55$  (Hexanes).  $^1\text{H}$  NMR (300 MHz,  $\text{CDCl}_3$ )  $\delta$  7.47 (d,  $J = 7.5$  Hz, 1H), 7.25 (p,  $J = 7.4$  Hz, 2H), 7.05 (d,  $J = 7.3$  Hz, 1H), 3.00 (t,  $J = 9.4$  Hz, 1H), 2.18 (t,  $J = 9.1$  Hz, 1H), 2.04 (t,  $J = 8.2$  Hz, 1H).  $^{13}\text{C}$  NMR (75 MHz,  $\text{CDCl}_3$ )  $\delta$  136.6, 135.0, 129.3, 129.2, 128.9, 126.6, 34.9, 27.2, 27.0.

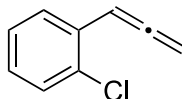

**1-Chloro-2-(propa-1,2-dien-1-yl)benzene (2f):**<sup>5</sup> Obtained as a colorless liquid in 60% yield. Compound purified by silica gel column chromatography eluting with Hexanes.  $R_f=0.7$  (Hexanes).  $^1\text{H}$  NMR (300 MHz,  $\text{CDCl}_3$ )  $\delta$  7.47 (d,  $J = 7.7$  Hz, 1H), 7.33 (d,  $J = 7.9$  Hz, 1H), 7.20 (t,  $J = 7.5$  Hz, 1H), 7.11 (t,  $J = 7.6$  Hz, 1H), 6.63 (t,  $J = 6.8$  Hz, 1H), 5.18 (d,  $J = 6.9$  Hz, 2H).  $^{13}\text{C}$  NMR (75 MHz,  $\text{CDCl}_3$ )  $\delta$  210.4, 131.8, 131.6, 129.5, 128.1, 127.8, 126.7, 90.3, 78.8.

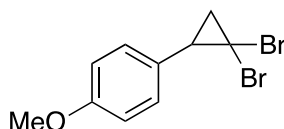

**1-(2,2-Dibromocyclopropyl)-4-methoxybenzene (S2-g):** Obtained as a colorless liquid in 63% yield. Compound purified by silica gel column chromatography eluting with Hexanes.  $R_f=0.35$  (DCM: Hexanes= 15: 85).  $^1\text{H}$  NMR (300 MHz,  $\text{CDCl}_3$ )  $\delta$  7.18 (d,  $J = 8.3$  Hz, 2H), 6.89 (d,  $J = 8.3$  Hz, 2H), 3.81 (s, 3H), 2.97 – 2.84 (m, 1H), 2.13 – 2.07 (m, 1H), 1.95 (t,  $J = 8.0$  Hz, 1H).  $^{13}\text{C}$  NMR (75 MHz,  $\text{CDCl}_3$ )  $\delta$  159.0, 129.9, 128.1, 113.6, 55.2, 35.2, 29.3, 27.2.

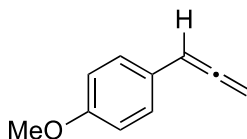

**1-Methoxy-4-(propa-1,2-dien-1-yl)benzene (2g):**<sup>3</sup> Obtained as a colorless liquid in 99% yield. Compound purified by silica gel column chromatography eluting with Hexanes.  $R_f=0.5$  (DCM: Hexanes= 15: 85).  $^1\text{H}$  NMR (300 MHz,  $\text{CDCl}_3$ )  $\delta$  7.24 (d,  $J = 8.6$  Hz, 2H), 6.87 (d,  $J = 8.7$  Hz, 2H), 6.15 (t,  $J = 6.8$  Hz, 1H), 5.13 (d,  $J = 6.8$  Hz, 2H), 3.80 (s, 4H).  $^{13}\text{C}$  NMR (75 MHz,  $\text{CDCl}_3$ )  $\delta$  209.3, 158.7, 127.7, 126.0, 114.1, 93.3, 78.6, 55.2.

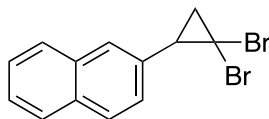

**2-(2,2-Dibromocyclopropyl)naphthalene (S2-h):** Obtained as a colorless liquid in 66% yield. Compound purified by silica gel column chromatography eluting with Hexanes.  $R_f=0.30$  (Hexanes).  $^1\text{H}$  NMR (300 MHz,  $\text{CDCl}_3$ )  $\delta$  7.85 – 7.80 (m, 3H), 7.65 (s, 1H), 7.53 – 7.39 (m, 3H), 3.27 – 2.99 (m, 1H), 2.32 – 2.06 (m, 2H).  $^{13}\text{C}$  NMR (75 MHz,  $\text{CDCl}_3$ )  $\delta$  133.5, 133.1, 132.6, 127.8, 127.7, 127.6, 127.5, 126.9, 126.2, 126.0, 36.0, 28.3, 27.3.

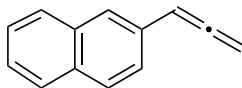

**2-(Propa-1,2-dien-1-yl)naphthalene (2h):**<sup>3</sup> Obtained as a colorless liquid in 76% yield. Compound purified by silica gel column chromatography eluting with Hexanes.  $R_f=0.45$  (Hexanes).  $^1\text{H}$  NMR (300 MHz,  $\text{CDCl}_3$ )  $\delta$  7.78 – 7.75 (m, 3H), 7.65 (s, 1H), 7.50 (d,  $J = 8.6$  Hz, 1H), 7.45 – 7.41 (m, 2H), 6.34 (t,  $J = 6.8$  Hz, 1H), 5.22 (d,  $J = 6.7$  Hz, 2H).  $^{13}\text{C}$  NMR (75 MHz,  $\text{CDCl}_3$ )  $\delta$  210.2, 133.6, 132.5, 131.3, 128.2, 127.6, 127.5, 126.1, 125.5, 125.3, 124.5, 94.2, 79.0.

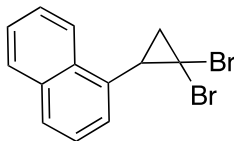

**1-(2,2-Dibromocyclopropyl)naphthalene (S2-i):** Obtained as a colorless liquid in 55% yield. Compound purified by silica gel column chromatography eluting with Hexanes.  $R_f=0.45$  (Hexanes).  $^1\text{H}$  NMR (300 MHz,  $\text{CDCl}_3$ )  $\delta$  8.29 (d,  $J = 8.4$  Hz, 1H), 7.94 (d,  $J = 8.1$  Hz, 1H), 7.86 (d,  $J = 8.3$  Hz, 1H), 7.70 (t,  $J = 7.6$  Hz, 1H), 7.59 (t,  $J = 7.5$  Hz, 1H), 7.44 (t,  $J = 7.7$  Hz, 1H), 7.22 (d,  $J = 7.1$  Hz, 1H), 3.30 (t,  $J = 7.9$  Hz, 1H), 2.32 (t,  $J = 8.0$  Hz, 1H), 2.22 (t,  $J = 7.9$  Hz, 1H).  $^{13}\text{C}$  NMR (75 MHz,  $\text{CDCl}_3$ )  $\delta$  133.8, 133.5, 133.2, 128.6, 128.5, 126.8, 126.3, 125.7, 125.3, 124.8, 34.8, 28.5, 27.0.

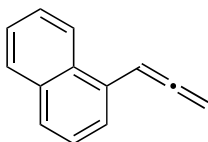

**1-(propa-1,2-dien-1-yl)naphthalene (2i):**<sup>6</sup> Obtained as a yellow oil in 90% yield. Compound purified by silica gel column chromatography eluting with Hexanes.  $R_f=0.55$  (Hexanes).  $^1\text{H}$  NMR (300 MHz,  $\text{CDCl}_3$ )  $\delta$  8.28 (d,  $J = 9.1$  Hz, 1H), 7.92 (d,  $J = 7.0$  Hz, 1H), 7.81 (d,  $J = 8.1$  Hz, 1H), 7.68 (d,  $J = 7.1$  Hz, 1H), 7.63 – 7.48 (m, 3H), 6.95 (t,  $J = 6.9$  Hz, 1H), 5.27 (d,  $J = 6.9$  Hz, 2H).  $^{13}\text{C}$  NMR (75 MHz,  $\text{CDCl}_3$ )  $\delta$  211.0, 133.9, 130.8, 130.1, 128.7, 127.5, 126.0, 125.7, 125.6, 125.3, 123.5, 90.5, 77.8.

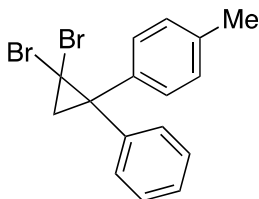

**1-(2,2-Dibromo-1-phenylcyclopropyl)-4-methylbenzene (S2-j):** Obtained as a colorless liquid in 59% yield. Compound purified by silica gel column chromatography eluting with Hexanes.  $R_f=0.35$  (Hexanes).  $^1\text{H}$  NMR (300 MHz,  $\text{CDCl}_3$ )  $\delta$  7.53 (d,  $J = 7.1$  Hz, 2H), 7.43 (d,  $J = 8.1$  Hz, 2H), 7.33 (t,  $J = 7.8$  Hz, 2H), 7.25 (d,  $J = 5.9$  Hz, 1H), 7.15 (d,  $J = 7.9$  Hz, 2H), 2.47 (s, 2H), 2.32 (s, 3H).  $^{13}\text{C}$  NMR (75 MHz,  $\text{CDCl}_3$ )  $\delta$  142.0, 139.0, 137.0, 129.1, 129.1, 129.0, 128.4, 127.2, 44.8, 34.4, 34.2, 21.1.

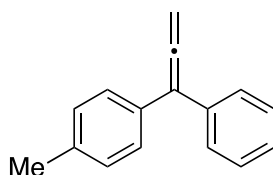

**1-Methyl-4-(1-phenylpropa-1,2-dien-1-yl)benzene (2j):**<sup>7</sup> Obtained as a colorless oil in 95% yield. Compound purified by silica gel column chromatography eluting with Hexanes.  $R_f=0.45$  (Hexanes).  $^1\text{H}$  NMR (300 MHz,  $\text{CDCl}_3$ )  $\delta$  7.44 – 7.33 (m, 4H), 7.30 (dd,  $J = 7.5, 3.4$  Hz, 3H), 7.19 (d,  $J = 7.9$  Hz, 2H), 5.27 (s, 2H), 2.39 (s, 3H).  $^{13}\text{C}$  NMR (75 MHz,  $\text{CDCl}_3$ )  $\delta$  209.7, 136.9, 136.4, 133.2, 129.1, 128.3, 128.3, 127.1, 108.9, 77.8, 21.1.

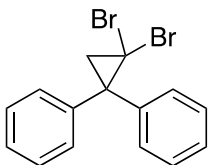

**(2,2-Dibromocyclopropane-1,1-diyl)dibenzene (S2-k):** Obtained as a colorless liquid in 54% yield. Compound purified by silica gel column chromatography eluting with dichloromethane and Hexanes.  $R_f=0.3$  (DCM: Hexanes= 15:85).  $^1\text{H}$  NMR (300 MHz,  $\text{CDCl}_3$ )  $\delta$  7.54 (d,  $J = 7.6$  Hz, 4H), 7.34 (t,  $J = 7.4$  Hz, 4H), 7.25 (t,  $J = 7.3$  Hz, 2H), 2.50 (s, 2H).  $^{13}\text{C}$  NMR (75 MHz,  $\text{CDCl}_3$ )  $\delta$  141.8, 129.1, 128.4, 127.3, 45.0, 34.5, 33.9.

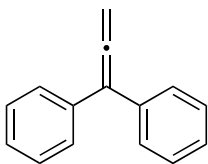

**Propa-1,2-diene-1,1-diyl dibenzene (2k):**<sup>6</sup> Obtained as a colorless oil in 78% yield. Compound purified by silica gel column chromatography eluting with dichloromethane and Hexanes.  $R_f=0.4$  (DCM: Hexanes= 15:85).

$^1\text{H}$  NMR (300 MHz,  $\text{CDCl}_3$ )  $\delta$  7.50 – 7.31 (m, 10H), 5.34 (s, 2H).  $^{13}\text{C}$  NMR (75 MHz,  $\text{CDCl}_3$ )  $\delta$  210.0, 136.3, 128.5, 127.3, 109.3, 78.2.

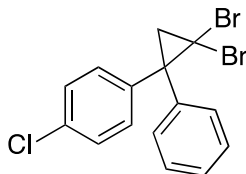

**1-Chloro-4-(2,2-dibromo-1-phenylcyclopropyl)benzene (S2-l):** Obtained as a yellow oil in 59% yield. Compound purified by silica gel column chromatography eluting with Hexanes.  $R_f$ =0.5 (Hexanes).  $^1\text{H}$  NMR (300 MHz,  $\text{CDCl}_3$ )  $\delta$  7.47 (dd,  $J$  = 10.9, 8.4 Hz, 4H), 7.35-7.24 (m, 5H), 2.49 (d,  $J$  = 7.6 Hz, 1H), 2.43 (d,  $J$  = 7.6 Hz, 1H).

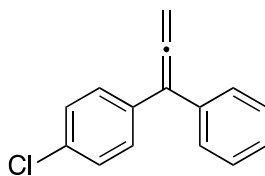

**1-Chloro-4-(1-phenylpropa-1,2-dien-1-yl)benzene (2l):**<sup>6</sup> Obtained as a yellow oil in 30% yield. Compound purified by silica gel column chromatography eluting with Hexanes.  $R_f$ =0.65 (Hexanes).  $^1\text{H}$  NMR (300 MHz,  $\text{CDCl}_3$ )  $\delta$  7.37-7.35 (m, 4H), 7.31-7.29 (m, 5H), 5.29 (s, 2H).  $^{13}\text{C}$  NMR (75 MHz,  $\text{CDCl}_3$ )  $\delta$  209.7, 135.7, 134.8, 132.9, 129.6, 128.5, 128.4, 128.3, 127.3, 108.3, 78.3.

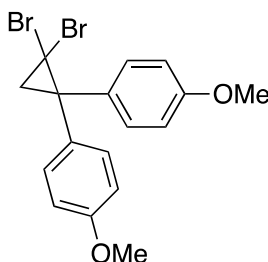

**4,4'-(2,2-Dibromocyclopropane-1,1-diyl)bis(methoxybenzene) (S2-m) :** Obtained as a yellow oil in 32% yield. Compound purified by silica gel column chromatography eluting with EtOAc and Hexanes.  $R_f$ =0.30 (EtOAc: Hexanes= 1:10).  $^1\text{H}$  NMR (300 MHz,  $\text{CDCl}_3$ )  $\delta$  7.37 (d,  $J$  = 8.8 Hz, 4H), 6.82 (d,  $J$  = 8.7 Hz, 4H), 3.74 (s, 6H), 2.38 (s, 2H).  $^{13}\text{C}$  NMR (75 MHz,  $\text{CDCl}_3$ )  $\delta$  158.5, 134.4, 130.0, 113.7, 55.1, 43.7, 34.5.

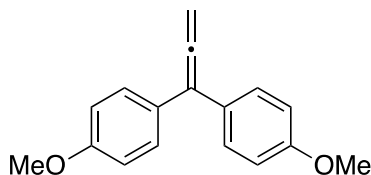

**4,4'-(Propa-1,2-diene-1,1-diyl)bis(methoxybenzene) (2m):**<sup>8</sup> Obtained as a yellow oil in 69% yield. Compound purified by silica gel column chromatography eluting with EtOAc and Hexanes.  $R_f$ =0.40 (EtOAc: Hexanes= 1:10).  $^1\text{H}$  NMR (300 MHz,  $\text{CDCl}_3$ )  $\delta$  7.32 (d,  $J$  = 8.3 Hz, 4H), 6.92 (d,  $J$  = 8.3 Hz, 4H), 5.25 (s, 2H), 3.84 (s, 6H).  $^{13}\text{C}$  NMR (75 MHz,  $\text{CDCl}_3$ )  $\delta$  209.4, 158.8, 129.4, 128.6, 113.8, 108.1, 77.7, 55.2.

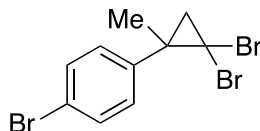

**1-Bromo-4-(2,2-dibromo-1-methylcyclopropyl)benzene (S2-n)** : Obtained as a colorless liquid in 67% yield. Compound purified by silica gel column chromatography eluting with Hexanes.  $R_f=0.55$  (Hexanes).  $^1\text{H}$  NMR (300 MHz,  $\text{CDCl}_3$ )  $\delta$  7.48 (d,  $J = 8.4$  Hz, 2H), 7.18 (d,  $J = 8.4$  Hz, 2H), 2.18 (d,  $J = 7.6$  Hz, 1H), 1.78 (d,  $J = 7.6$  Hz, 1H), 1.69 (s, 3H).  $^{13}\text{C}$  NMR (75 MHz,  $\text{CDCl}_3$ )  $\delta$  141.3, 131.5, 130.2, 121.2, 36.0, 35.2, 33.7, 27.5.

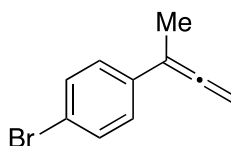

**1-Bromo-4-(buta-2,3-dien-2-yl)benzene (2n)**:<sup>6</sup> Obtained as a yellow solid in 71% yield. Compound purified by silica gel column chromatography eluting with Hexanes.  $R_f=0.7$  (Hexanes).  $^1\text{H}$  NMR (300 MHz,  $\text{CDCl}_3$ )  $\delta$  7.42 (d,  $J = 8.5$  Hz, 2H), 7.25 (d,  $J = 8.4$  Hz, 2H), 5.01 (d,  $J = 2.9$  Hz, 2H), 2.06 (t,  $J = 2.8$  Hz, 3H).  $^{13}\text{C}$  NMR (75 MHz,  $\text{CDCl}_3$ )  $\delta$  208.8, 135.7, 131.2, 127.2, 120.3, 99.0, 77.2, 16.5.

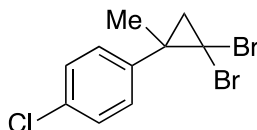

**1-Chloro-4-(2,2-dibromo-1-methylcyclopropyl)benzene (S2-o)**:<sup>6</sup> Obtained as a colorless liquid in 99% yield. Compound purified by silica gel column chromatography eluting with Hexanes.  $R_f=0.35$  (Hexanes).  $^1\text{H}$  NMR (300 MHz,  $\text{CDCl}_3$ )  $\delta$  7.32 (d,  $J = 8.5$  Hz, 2H), 7.22 (d,  $J = 7.9$  Hz, 2H), 2.11 (d,  $J = 7.6$  Hz, 1H), 1.77 (d,  $J = 7.6$  Hz, 1H), 1.68 (s, 3H).  $^{13}\text{C}$  NMR (75 MHz,  $\text{CDCl}_3$ )  $\delta$  140.8, 133.0, 129.8, 128.5, 35.9, 35.1, 33.7, 27.5.

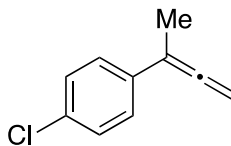

**1-(Buta-2,3-dien-2-yl)-4-chlorobenzene (2o)**:<sup>6</sup> Obtained as a yellow solid in 86% yield. Compound purified by silica gel column chromatography eluting with Hexanes.  $R_f=0.45$  (Hexanes).  $^1\text{H}$  NMR (300 MHz,  $\text{CDCl}_3$ )  $\delta$  7.32 (d,  $J = 8.8$  Hz, 2H), 7.27 (d,  $J = 8.9$  Hz, 2H), 5.03 (s, 2H), 2.06 (s, 3H).  $^{13}\text{C}$  NMR (75 MHz,  $\text{CDCl}_3$ )  $\delta$  208.8, 135.2, 132.2, 128.3, 126.8, 98.9, 77.2, 16.5.

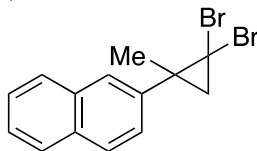

**2-(2,2-Dibromo-1-methylcyclopropyl)naphthalene (S2-p)**: Obtained as a colorless liquid in 69% yield. Compound purified by silica gel column chromatography eluting with dichloromethane and Hexanes.  $R_f=0.45$  (DCM: Hexanes= 15:85).  $^1\text{H}$  NMR (300 MHz,  $\text{CDCl}_3$ )  $\delta$  7.92 – 7.80 (m, 3H), 7.70 (s, 1H), 7.56 – 7.46 (m, 3H), 2.32 (d,  $J = 7.6$  Hz, 1H), 1.88 (d,  $J = 7.6$  Hz, 1H), 1.80 (s, 3H).  $^{13}\text{C}$  NMR (75 MHz,  $\text{CDCl}_3$ )  $\delta$  140.0, 133.3, 132.6, 128.2, 127.8, 127.8, 127.0, 126.8, 126.3, 126.1, 36.7, 36.0, 33.9, 27.7.



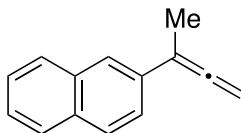

**2-(Buta-2,3-dien-2-yl)naphthalene (2p):**<sup>6</sup> Obtained as a yellow solid in 99% yield. Compound purified by silica gel column chromatography eluting with dichloromethane and Hexanes.  $R_f=0.5$  (DCM: Hexanes= 15:85).  $^1\text{H}$  NMR (300 MHz,  $\text{CDCl}_3$ )  $\delta$  7.88 – 7.72 (m, 4H), 7.66 (d,  $J = 8.6$  Hz, 1H), 7.52 – 7.41 (m, 2H), 5.25 – 5.06 (m, 2H), 2.24 (t,  $J = 2.7$  Hz, 3H).  $^{13}\text{C}$  NMR (75 MHz,  $\text{CDCl}_3$ )  $\delta$  209.7, 134.1, 133.6, 132.3, 128.0, 127.7, 127.6, 126.1, 125.7, 125.0, 123.3, 100.1, 16.8.

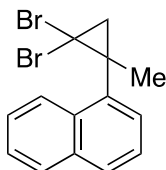

**1-(2,2-Dibromo-1-methylcyclopropyl)naphthalene (S2-q):** Obtained as a colorless liquid in 55% yield. Compound purified by silica gel column chromatography eluting with dichloromethane and Hexanes.  $R_f=0.45$  (DCM: Hexanes= 15:85).  $^1\text{H}$  NMR (300 MHz,  $\text{CDCl}_3$ )  $\delta$  8.20 (d,  $J = 8.4$  Hz, 1H), 7.92 (d,  $J = 8.1$  Hz, 1H), 7.81 (d,  $J = 8.2$  Hz, 1H), 7.67 (t,  $J = 7.6$  Hz, 1H), 7.56 (t,  $J = 8.0$  Hz, 1H), 7.47 – 7.39 (m, 1H), 7.32 (d,  $J = 7.1$  Hz, 1H), 2.27 (d,  $J = 7.4$  Hz, 1H), 1.98 (d,  $J = 7.4$  Hz, 1H), 1.85 (s, 3H).  $^{13}\text{C}$  NMR (75 MHz,  $\text{CDCl}_3$ )  $\delta$  139.7, 134.0, 131.4, 128.6, 128.0, 126.2, 126.0, 125.9, 125.4, 37.3, 35.4, 34.5, 26.9.

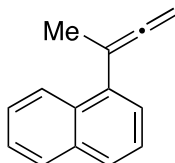

**1-(Buta-2,3-dien-2-yl)naphthalene (2q):**<sup>6</sup> Obtained as a yellow oil in 90% yield. Compound purified by silica gel column chromatography eluting with dichloromethane and Hexanes.  $R_f=0.5$  (DCM: Hexanes= 15:85).  $^1\text{H}$  NMR (300 MHz,  $\text{CDCl}_3$ )  $\delta$  8.24 (d,  $J = 7.4$  Hz, 1H), 7.88 (d,  $J = 8.5$  Hz, 1H), 7.79 (d,  $J = 7.1$  Hz, 1H), 7.58 – 7.43 (m, 4H), 4.88 (q,  $J = 3.1$  Hz, 2H), 2.24 (t,  $J = 3.2$  Hz, 3H).  $^{13}\text{C}$  NMR (75 MHz,  $\text{CDCl}_3$ )  $\delta$  208.2, 136.5, 134.0, 130.9, 128.5, 127.5, 125.9, 125.8, 125.5, 125.5, 125.0, 98.2, 74.3, 21.2.

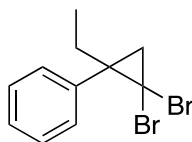

**(2,2-Dibromo-1-ethylcyclopropyl)benzene (S2-r):** Obtained as a colorless liquid in 80% yield. Compound purified by silica gel column chromatography eluting with Hexanes.  $R_f=0.5$  (Hexanes).  $^1\text{H}$  NMR (300 MHz,  $\text{CDCl}_3$ )  $\delta$  7.37 (d,  $J = 7.5$  Hz, 2H), 7.31 – 7.28 (m, 3H), 2.25 – 2.13 (m, 1H), 2.07 (d,  $J = 7.4$  Hz, 1H), 1.90 – 1.77 (m, 1H), 1.75 (d,  $J = 7.5$  Hz, 1H), 0.89 (t,  $J = 7.4$  Hz, 3H).  $^{13}\text{C}$  NMR (75 MHz,  $\text{CDCl}_3$ )  $\delta$  140.2, 129.4, 128.1, 127.2, 41.0, 36.8, 33.7, 32.8, 11.3.

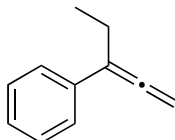

**(Penta-1,2-dien-3-yl)benzene (2r):**<sup>6</sup> Obtained as a colorless liquid in 71% yield. Compound purified by silica gel column chromatography eluting with Hexanes.  $R_f=0.6$  (Hexanes).  $^1\text{H}$  NMR (300 MHz,  $\text{CDCl}_3$ )  $\delta$  7.49 (d,  $J = 7.8$  Hz, 2H), 7.41 – 7.36 (m, 2H), 7.26 (t,  $J = 6.6$  Hz, 1H), 5.17 (s, 2H), 2.54 – 2.48 (m, 2H), 1.28 – 1.21 (m, 3H).  $^{13}\text{C}$  NMR (75 MHz,  $\text{CDCl}_3$ )  $\delta$  208.4, 136.5, 128.3, 126.5, 125.9, 106.7, 78.7, 22.4, 12.4.

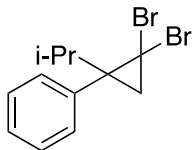

**(2,2-Dibromo-1-isopropylcyclopropyl)benzene (S2-s):** Obtained as a colorless liquid in 59% yield. Compound purified by silica gel column chromatography eluting with Hexanes.  $R_f=0.65$  (Hexanes).  $^1\text{H}$  NMR (300 MHz,  $\text{CDCl}_3$ )  $\delta$  7.52 – 7.26 (m, 4H), 7.07 (s, 1H), 2.03 – 1.85 (m, 2H), 1.79 (d,  $J = 7.1$  Hz, 1H), 1.12 (d,  $J = 6.7$  Hz, 3H), 0.88 (d,  $J = 6.8$  Hz, 3H).  $^{13}\text{C}$  NMR (75 MHz,  $\text{CDCl}_3$ )  $\delta$  136.8, 132.4, 130.7, 128.0, 127.3, 126.9, 44.1, 37.9, 36.9, 35.4, 20.2, 19.1.

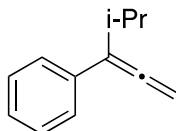

**(4-Methylpenta-1,2-dien-3-yl)benzene (2s):**<sup>9</sup> Obtained as a colorless liquid in 77% yield. Compound purified by silica gel column chromatography eluting with Hexanes.  $R_f=0.75$  (Hexanes).  $^1\text{H}$  NMR (300 MHz,  $\text{CDCl}_3$ )  $\delta$  7.39 (d,  $J = 7.8$  Hz, 2H), 7.35 – 7.17 (m, 3H), 5.07 (d,  $J = 2.3$  Hz, 2H), 2.85 – 2.74 (m, 1H), 1.14 (d,  $J=0.75\text{Hz}$ , 3H), 1.12 (d,  $J=0.75\text{Hz}$ , 3H).  $^{13}\text{C}$  NMR (75 MHz,  $\text{CDCl}_3$ )  $\delta$  207.5, 136.4, 130.9, 128.2, 127.6, 126.4, 112.1, 78.9, 27.2, 22.0.

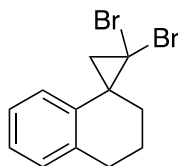

**2,2-Dibromo-3',4'-dihydro-2'H-spiro[cyclopropane-1,1'-naphthalene] (S2-t):** Obtained as a colorless oil in 68% yield. Compound purified by silica gel column chromatography eluting with Hexanes.  $R_f=0.45$  (Hexanes).  $^1\text{H}$  NMR (300 MHz,  $\text{CDCl}_3$ )  $\delta$  7.22 – 7.15 (m, 3H), 6.98 (d,  $J = 7.7$  Hz, 1H), 3.05 – 2.86 (m, 2H), 2.44 (d,  $J = 8.2$  Hz, 1H), 2.35 – 2.02 (m, 3H), 2.01 – 1.87 (m, 1H), 1.82 (d,  $J = 8.2$  Hz, 1H).  $^{13}\text{C}$  NMR (75 MHz,  $\text{CDCl}_3$ )  $\delta$  139.5, 135.6, 128.5, 127.4, 126.2, 124.9, 39.5, 34.9, 33.5, 31.2, 29.2, 20.7.

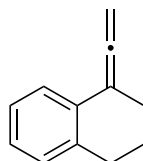

**1-Vinylidene-1,2,3,4-tetrahydronaphthalene (2t):**<sup>11</sup> Obtained as a colorless oil in 85% yield. Compound purified by silica gel column chromatography eluting with Hexanes.  $R_f=0.55$  (Hexanes).  $^1\text{H}$  NMR (300 MHz,  $\text{CDCl}_3$ )  $\delta$  7.58 (d,  $J = 7.4$  Hz, 1H), 7.28 – 7.10 (m, 3H), 5.14 (s, 2H), 2.87 (t,  $J = 6.3$  Hz, 2H), 2.73 – 2.57 (m, 2H), 1.97 (p,  $J = 6.1$  Hz, 2H).  $^{13}\text{C}$  NMR (75 MHz,  $\text{CDCl}_3$ )  $\delta$  206.5, 136.3, 131.1, 129.1, 126.8, 126.5, 126.0, 101.0, 77.9, 30.1, 28.7, 22.8.

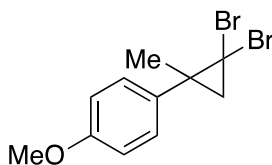

**1-(2,2-Dibromo-1-methylcyclopropyl)-4-methoxybenzene (S2-u):** Obtained as a colorless liquid in 46% yield. Compound purified by silica gel column chromatography eluting with dichloromethane and Hexanes.  $R_f=0.30$  (DCM: Hexanes= 15: 85).  $^1\text{H}$  NMR (300 MHz,  $\text{CDCl}_3$ )  $\delta$  7.20 (d,  $J = 8.7$  Hz, 2H), 6.87 (d,  $J = 8.7$  Hz, 2H), 3.79 (s, 3H), 2.10 (d,  $J = 7.5$  Hz, 1H), 1.73 (d,  $J = 7.5$  Hz, 1H), 1.68 (s, 3H).  $^{13}\text{C}$  NMR (75 MHz,  $\text{CDCl}_3$ )  $\delta$  158.5, 134.5, 129.4, 113.6, 55.1, 37.3, 35.0, 33.7, 27.6.

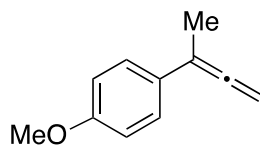

**1-(Buta-2,3-dien-2-yl)-4-methoxybenzene (2u):**<sup>6</sup> Obtained as a colorless oil in 75% yield. Compound purified by silica gel column chromatography eluting with dichloromethane and Hexanes.  $R_f=0.45$  (DCM: Hexanes= 15:85).  $^1\text{H}$  NMR (300 MHz,  $\text{CDCl}_3$ )  $\delta$  7.35 (d,  $J$  = 8.7 Hz, 2H), 6.88 (d,  $J$  = 8.8 Hz, 2H), 5.01 (q,  $J$  = 3.1 Hz, 2H), 3.81 (s, 3H), 2.09 (t,  $J$  = 3.1 Hz, 3H).  $^{13}\text{C}$  NMR (75 MHz,  $\text{CDCl}_3$ )  $\delta$  208.5, 158.4, 128.9, 126.7, 113.7, 99.2, 76.7, 55.2, 16.8.

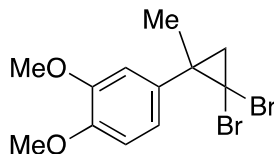

**4-(2,2-Dibromo-1-methylcyclopropyl)-1,2-dimethoxybenzene (S2-v):** Obtained as a colorless liquid in 73% yield. Compound purified by silica gel column chromatography eluting with EtOAc and Hexanes.  $R_f=0.3$  (EtOAc : Hexanes= 1:10).  $^1\text{H}$  NMR (300 MHz,  $\text{CDCl}_3$ )  $\delta$  6.79 (s, 3H), 3.89 (s, 3H), 3.85 (s, 3H), 2.10 (d,  $J$  = 7.5 Hz, 1H), 1.73 (d,  $J$  = 7.5 Hz, 1H), 1.68 (s, 3H).  $^{13}\text{C}$  NMR (75 MHz,  $\text{CDCl}_3$ )  $\delta$  148.6, 148.1, 134.9, 120.3, 111.7, 110.7, 55.9, 55.7, 37.1, 35.4, 33.9, 27.6.

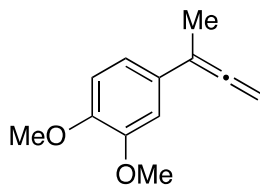

**4-(Buta-2,3-dien-2-yl)-1,2-dimethoxybenzene (2v):**<sup>1</sup> Obtained as a colorless oil in 89% yield. Compound purified by silica gel column chromatography eluting with EtOAc and Hexanes.  $R_f=0.45$  (EtOAc: Hexanes= 1:10).  $^1\text{H}$  NMR (300 MHz,  $\text{CDCl}_3$ )  $\delta$  6.96 (d,  $J$  = 1.9 Hz, 1H), 6.89 (dd,  $J$  = 8.4, 2.0 Hz, 1H), 6.81 (d,  $J$  = 8.4 Hz, 1H), 5.00 (q,  $J$  = 3.1 Hz, 2H), 3.86 (s, 3H), 3.85 (s, 3H), 2.06 (t,  $J$  = 3.1 Hz, 3H).  $^{13}\text{C}$  NMR (75 MHz,  $\text{CDCl}_3$ )  $\delta$  208.5, 148.7, 148.0, 129.2, 117.5, 110.9, 109.2, 99.5, 76.8, 55.8, 55.7, 16.7.

#### General procedure for chlorination of allenes:

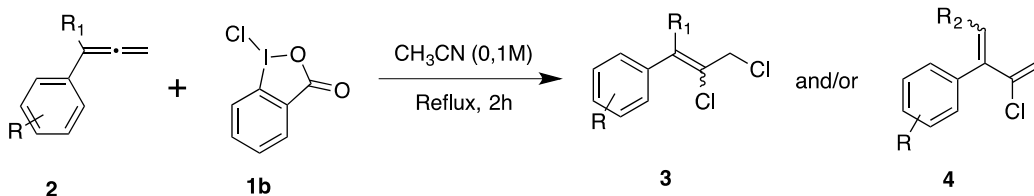

To an oven dried flask with a magnetic stir bar was charged 1-chloro-1,2-benziodoxol-3-one (**1b**, 0.44 mmol, 2.2 equiv) and acetonitrile (1 mL), and the resulting solution was placed under a nitrogen atmosphere. The reaction flask was immersed in a preheated 85 °C oil bath and stirred. To this, a solution of allenes **2a–v** (0.2 mmol, 1.0 equiv) in acetonitrile (1 mL) was added by syringe pump over 60 min. Then the reaction was monitored by TLC analysis, and upon consumption of the allene ( $\approx 1$  h), the reaction mixture was cooled to room temperature and concentrated under vacuum by rotary evaporation. The resulting crude product mixture was purified by silica gel chromatography to provide the chlorination products **3a–4v**.

### Characterization data for chlorination:

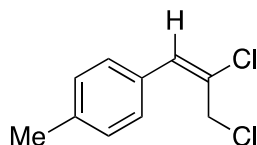

**(E)-1-(2,3-Dichloroprop-1-en-1-yl)-4-methylbenzene (E-3a):**<sup>12</sup> Obtained as a white solid in 40% yield. Compound purified by silica gel column chromatography eluting with Hexanes.  $R_f=0.6$  (Hexanes). IR (ATR) 3025, 1738, 1637, 1511, 1366, 1261, 1222, 1187, 1092, 808, 700, 626 $\text{cm}^{-1}$ .  $^1\text{H}$  NMR (500 MHz,  $\text{CDCl}_3$ )  $\delta$  7.20 (s, 4H), 6.88 (s, 1H), 4.36 (s, 2H), 2.36 (s, 3H).  $^{13}\text{C}$  NMR (126 MHz,  $\text{CDCl}_3$ )  $\delta$  139.0, 133.7, 132.2, 131.5, 130.2, 128.8, 46.1, 21.9. HRMS-APCI calcd for  $\text{C}_{10}\text{H}_{10}\text{Cl}_2$   $[\text{M}]^+$  200.0154, found 200.0155.

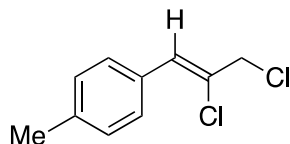

**(Z)-1-(2,3-Dichloroprop-1-en-1-yl)-4-methylbenzene (Z-3a):**<sup>12</sup> Obtained as a white solid in 50% yield. Compound purified by silica gel column chromatography eluting with Hexanes.  $R_f=0.50$  (Hexanes). IR (ATR) 2922, 1738, 1609, 1494, 1261, 1216, 1092, 873, 808, 700, 604 $\text{cm}^{-1}$ .  $^1\text{H}$  NMR (500 MHz,  $\text{CDCl}_3$ )  $\delta$  7.56 (d,  $J = 8.1$  Hz, 2H), 7.19 (d,  $J = 7.9$  Hz, 2H), 6.80 (s, 1H), 4.35 (s, 2H).  $^{13}\text{C}$  NMR (126 MHz,  $\text{CDCl}_3$ )  $\delta$  139.5, 131.5, 129.9, 129.7, 129.3, 128.6, 51.4, 22.0. HRMS-APCI calcd for  $\text{C}_{10}\text{H}_{10}\text{Cl}_2$   $[\text{M}]^+$  200.0154, found 200.0155.

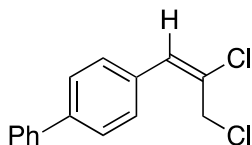

**(E)-4-(2,3-Dichloroprop-1-en-1-yl)-1,1'-biphenyl (E-3b):** Obtained as a white solid in 36% yield. Compound purified by silica gel column chromatography eluting with Hexanes.  $R_f=0.40$  (Hexanes). IR (ATR) 2970, 1738, 1606, 1435, 1389, 1259, 1073, 1043, 902, 689, 518 $\text{cm}^{-1}$ .  $^1\text{H}$  NMR (500 MHz,  $\text{CDCl}_3$ )  $\delta$  7.63 (d,  $J = 8.3$  Hz, 2H), 7.60 (d,  $J = 7.1$  Hz, 2H), 7.46 (t,  $J = 7.6$  Hz, 2H), 7.38 (m, 3H), 6.95 (s, 1H), 4.41 (s, 2H).  $^{13}\text{C}$  NMR (126 MHz,  $\text{CDCl}_3$ )  $\delta$  141.8, 140.8, 134.0, 133.3, 132.2, 129.6, 129.4, 128.4, 128.2, 127.7, 46.1. HRMS-APCI calcd for  $\text{C}_{15}\text{H}_{12}\text{Cl}_2$   $[\text{M}]^+$  262.0311, found 262.0312.

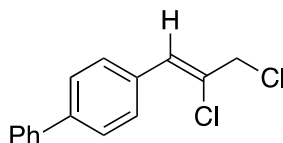

**(Z)-4-(2,3-Dichloroprop-1-en-1-yl)-1,1'-biphenyl (Z-3b):** Obtained as a white solid in 52% yield. Compound purified by silica gel column chromatography eluting with Hexanes.  $R_f=0.3$  (Hexanes). IR (ATR) 2970, 1738, 1626, 1588, 1487, 1566, 1216, 1108, 1010, 930, 704, 531 $\text{cm}^{-1}$ .  $^1\text{H}$  NMR (500 MHz,  $\text{CDCl}_3$ )  $\delta$  7.75 (d,  $J = 8.1$  Hz, 2H), 7.62 (d,  $J = 8.3$  Hz, 4H), 7.45 (t,  $J = 7.6$  Hz, 2H), 7.37 (t,  $J = 7.4$  Hz, 1H), 6.88 (s, 1H), 4.38 (s, 2H).  $^{13}\text{C}$  NMR (126 MHz,  $\text{CDCl}_3$ )  $\delta$  142.1, 141.0, 133.3, 130.4, 129.5, 129.0, 128.3, 127.7, 127.6, 51.3. HRMS-APCI calcd for  $\text{C}_{15}\text{H}_{12}\text{Cl}_2$   $[\text{M}]^+$  262.0311, found 262.0312.

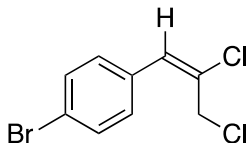

**(E)-1-Bromo-4-(2,3-dichloroprop-1-en-1-yl)benzene (E-3c):** Obtained as a colorless liquid in 34% yield. Compound purified by silica gel column chromatography eluting with Hexanes.  $R_f=0.40$  (Hexanes). IR (ATR) 3029, 2970, 1738, 1486, 1365, 1045, 766, 721, 697  $\text{cm}^{-1}$ .  $^1\text{H}$  NMR (500 MHz,  $\text{CDCl}_3$ )  $\delta$  7.51 (s, 4H), 6.78 (s, 1H), 4.33 (s, 2H).  $^{13}\text{C}$  NMR (126 MHz,  $\text{CDCl}_3$ )  $\delta$  133.2, 132.2, 131.4, 130.4, 128.1, 123.4, 50.8. HRMS-APCI calcd for  $\text{C}_9\text{H}_7\text{BrCl}_2$   $[\text{M}]^+$  263.9103, found 263.9104.

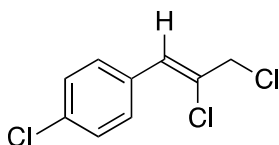

**(Z)-1-Chloro-4-(2,3-dichloroprop-1-en-1-yl)benzene (Z-3d):**<sup>12</sup> Obtained as a colorless liquid in 18% yield. Compound purified by silica gel column chromatography eluting with Hexanes.  $R_f=0.45$  (Hexanes). IR (ATR) 2970, 1738, 1365, 1228, 1216, 1092, 588, 527  $\text{cm}^{-1}$ .  $^1\text{H}$  NMR (500 MHz,  $\text{CDCl}_3$ )  $\delta$  7.58 (d,  $J = 8.5$  Hz, 2H), 7.35 (d,  $J = 8.6$  Hz, 2H), 6.80 (s, 1H), 4.34 (s, 2H).  $^{13}\text{C}$  NMR (126 MHz,  $\text{CDCl}_3$ )  $\delta$  135.1, 132.7, 131.2, 130.2, 129.2, 128.0, 50.9. HRMS-APCI calcd for  $\text{C}_9\text{H}_7\text{Cl}_3$   $[\text{M}]^+$  219.9608, found 219.9609.

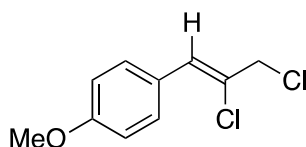

**(Z)-1-(2,3-Dichloroprop-1-en-1-yl)-4-methoxybenzene (Z-3g):**<sup>12</sup> Obtained as a colorless liquid in 52% yield. Compound purified by silica gel column chromatography eluting with Hexanes.  $R_f=0.30$  (DCM: Hexanes= 15: 85). IR (ATR) 2957, 1738, 1605, 1510, 1441, 1297, 1251, 1178, 1032, 825, 699, 537  $\text{cm}^{-1}$ .  $^1\text{H}$  NMR (500 MHz,  $\text{CDCl}_3$ )  $\delta$  7.64 (d,  $J = 8.8$  Hz, 2H), 6.90 (d,  $J = 8.8$  Hz, 2H), 6.76 (s, 1H), 4.35 (s, 2H), 3.83 (s, 3H).  $^{13}\text{C}$  NMR (126 MHz,  $\text{CDCl}_3$ )  $\delta$  160.5, 133.4, 131.5, 130.3, 129.0, 114.4, 56.0, 51.7. HRMS-APCI calcd for  $\text{C}_{10}\text{H}_{10}\text{OCl}_2$   $[\text{M}]^+$  216.0103, found 216.0105.

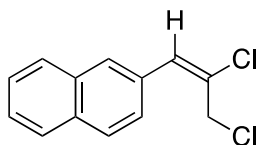

**(E)-2-(2,3-Dichloroprop-1-en-1-yl)naphthalene (E-3h):** Obtained as a white solid in 26% yield. Compound purified by silica gel column chromatography eluting with Hexanes.  $R_f=0.38$  (Hexanes). IR (ATR) 2991, 1738, 1598, 1431, 1259, 1216, 1047, 904, 817, 724  $\text{cm}^{-1}$ .  $^1\text{H}$  NMR (500 MHz,  $\text{CDCl}_3$ )  $\delta$  7.90 – 7.83 (m, 3H), 7.81 (s, 1H), 7.53 – 7.49 (m, 2H), 7.40 (d,  $J = 8.5$  Hz, 1H), 7.07 (s, 1H), 4.42 (s, 2H).  $^{13}\text{C}$  NMR (126 MHz,  $\text{CDCl}_3$ )  $\delta$  133.9, 133.8, 133.5, 132.5, 132.5, 129.2, 128.9, 128.4, 128.3, 127.4, 127.3, 126.4, 46.2. HRMS-APCI calcd for  $\text{C}_{13}\text{H}_{10}\text{Cl}_2$   $[\text{M}]^+$  236.0154, found 236.0154.

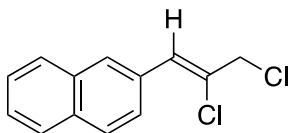

**(Z)-2-(2,3-Dichloroprop-1-en-1-yl)naphthalene (Z-3h):** Obtained as a white solid in 67% yield. Compound purified by silica gel column chromatography eluting with Hexanes.  $R_f=0.30$  (Hexanes). IR (ATR) 2927, 1738, 1505, 1365, 1229, 1184, 1018, 868, 744, 700  $\text{cm}^{-1}$ .  $^1\text{H}$  NMR (500 MHz,  $\text{CDCl}_3$ )  $\delta$  8.13 (s, 1H), 7.84 (m, 3H), 7.76 (d,  $J = 10.2$  Hz, 1H), 7.50 (m, 2H), 7.00 (s, 1H), 4.41 (s, 2H).  $^{13}\text{C}$  NMR (126 MHz,  $\text{CDCl}_3$ )  $\delta$  133.8, 133.7, 131.8, 129.8, 129.8, 129.4, 129.0, 128.5, 128.3, 127.4, 127.2, 127.0, 51.3. HRMS-APCI calcd for  $\text{C}_{13}\text{H}_{10}\text{Cl}_2$   $[\text{M}]^+$  236.0154, found 236.0154.

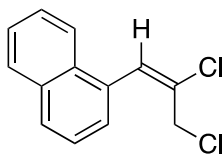

**(E)-1-(2,3-Dichloroprop-1-en-1-yl)naphthalene (E-3i):** Obtained as a colorless liquid in 28% yield. Compound purified by silica gel column chromatography eluting with Hexanes.  $R_f=0.45$  (Hexanes). IR (ATR) 2984, 1738, 1428, 1258, 1083, 1036, 931, 803, 723  $\text{cm}^{-1}$ .  $^1\text{H}$  NMR (500 MHz,  $\text{CDCl}_3$ )  $\delta$  7.93 – 7.83 (m, 3H), 7.59 – 7.51 (m, 2H), 7.51 – 7.48 (m, 2H), 7.37 (s, 1H), 4.28 (s, 2H).  $^{13}\text{C}$  NMR (126 MHz,  $\text{CDCl}_3$ )  $\delta$  134.2, 133.5, 132.2, 132.0, 131.9, 129.8, 129.2, 127.4, 127.1, 127.0, 126.1, 125.0, 45.8. HRMS-APCI calcd for  $\text{C}_{13}\text{H}_{10}\text{Cl}_2$   $[\text{M}]^+$  236.0154, found 236.0154.

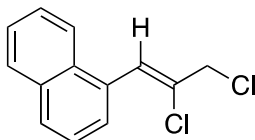

**(Z)-1-(2,3-Dichloroprop-1-en-1-yl)naphthalene (Z-3i):** Obtained as a colorless liquid in 50% yield. Compound purified by silica gel column chromatography eluting with Hexanes.  $R_f=0.35$  (Hexanes). IR (ATR) 2926, 1738, 1508, 1366, 1183, 1045, 1014, 860, 696  $\text{cm}^{-1}$ .  $^1\text{H}$  NMR (500 MHz,  $\text{CDCl}_3$ )  $\delta$  7.89 (m, 2H), 7.85 (d,  $J = 8.2$  Hz, 1H), 7.70 (d,  $J = 7.1$  Hz, 1H), 7.57 – 7.47 (m, 3H), 7.40 (s, 1H), 4.48 (s, 2H).  $^{13}\text{C}$  NMR (126 MHz,  $\text{CDCl}_3$ )  $\delta$  134.1, 132.5, 131.9, 131.6, 129.5, 129.3, 127.9, 127.6, 127.1, 126.7, 125.8, 124.7, 50.0. HRMS-APCI calcd for  $\text{C}_{13}\text{H}_{10}\text{Cl}_2$   $[\text{M}]^+$  236.01541, found 236.01544.

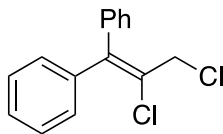

**(2,3-Dichloroprop-1-ene-1,1-diyl)dibenzene (3j):** Obtained as a colorless liquid in 84% yield. Compound purified by silica gel column chromatography eluting with DCM and Hexanes.  $R_f=0.3$  (DCM: Hexanes= 15:85). IR (ATR) 3057, 1738, 1492, 1443, 1262, 1165, 1083, 1001, 899, 764, 696  $\text{cm}^{-1}$ .  $^1\text{H}$  NMR (500 MHz,  $\text{CDCl}_3$ )  $\delta$  7.40 – 7.32 (m, 5H), 7.32 – 7.27 (m, 5H), 4.34 (s, 2H).  $^{13}\text{C}$  NMR (126 MHz,  $\text{CDCl}_3$ )  $\delta$  144.6, 140.5, 140.1, 130.0, 129.6, 129.3, 129.0, 128.7, 128.7, 128.6, 48.6. HRMS-APCI calcd for  $\text{C}_{15}\text{H}_{12}\text{Cl}_2$   $[\text{M}]^+$  262.0311, found 262.0313.

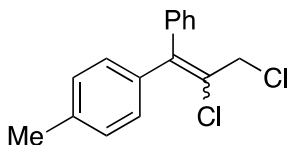

**1-(2,3-Dichloro-1-phenylprop-1-en-1-yl)-4-methylbenzene (3k):** Obtained as a white solid in 79% yield. Compound purified by silica gel column chromatography eluting with Hexanes.  $R_f=0.3$  (Hexanes). IR (ATR) 2922, 1738, 1609, 1494, 1261, 1216, 1092, 873, 808, 700, 604  $\text{cm}^{-1}$ . **(Z-3j)**  $^1\text{H}$  NMR (500 MHz,  $\text{CDCl}_3$ )  $\delta$  7.40 – 7.31 (m, 2H), 7.31 – 7.24 (m, 3H), 7.21 – 7.14 (m, 4H), 4.33 (s, 2H), 2.35 (s, 3H).  $^{13}\text{C}$  NMR (126 MHz,  $\text{CDCl}_3$ )  $\delta$  144.6, 140.7, 138.9, 137.6, 130.0, 129.9, 129.6, 129.2, 128.7, 128.2, 48.8, 22.0. **(E-3j)**  $^1\text{H}$  NMR (500 MHz,  $\text{CDCl}_3$ )  $\delta$  7.40 – 7.31 (m, 2H), 7.31 – 7.24 (m, 3H), 7.21 – 7.14 (m, 4H), 4.36 (s, 2H), 2.36 (s, 3H).  $^{13}\text{C}$  NMR (126 MHz,  $\text{CDCl}_3$ )  $\delta$  144.6, 140.4, 138.9, 138.6, 137.3, 130.0, 129.7, 129.4, 128.9, 128.6, 128.1, 48.8, 21.9. HRMS-APCI calcd for  $\text{C}_{16}\text{H}_{14}\text{Cl}_2$   $[\text{M}]^+$  276.0467, found 276.0469.

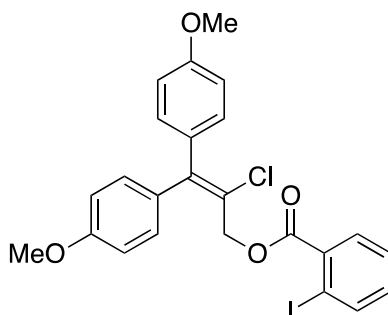

**2-Chloro-3,3-bis(4-methoxyphenyl)allyl 2-iodobenzoate (3m<sup>+</sup>)**: Obtained as a white solid in 57% yield. Compound purified by silica gel column chromatography eluting with Hexanes.  $R_f=0.3$  (Hexanes). IR (ATR) 2922, 1738, 1609, 1494, 1261, 1216, 1092, 873, 808, 700, 604  $\text{cm}^{-1}$ .  $^1\text{H}$  NMR (500 MHz,  $\text{CDCl}_3$ )  $\delta$  8.01 (d,  $J = 7.9$  Hz, 1H), 7.92 (d,  $J = 7.8$  Hz, 1H), 7.43 (t,  $J = 8.1$  Hz, 1H), 7.26 (d,  $J = 8.8$  Hz, 2H), 7.17 (t,  $J = 7.7$  Hz, 1H), 7.13 (d,  $J = 8.7$  Hz, 2H), 6.89 – 6.82 (m, 4H), 5.08 (s, 2H), 3.81 (s, 3H), 3.80 (s, 3H).  $^{13}\text{C}$  NMR (126 MHz,  $\text{CDCl}_3$ )  $\delta$  166.6, 160.2, 159.8, 145.0, 142.1, 135.4, 133.5, 133.2, 132.8, 131.9, 131.8, 131.4, 129.5, 128.6, 124.9, 114.5, 114.0, 94.9, 68.0, 56.0, 55.9. HRMS-ESI calcd for  $\text{C}_{24}\text{H}_{20}\text{ClIO}_4$   $[\text{M}]^+$  534.0089, found 534.0089.

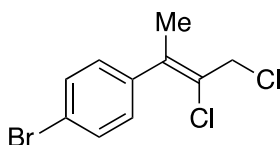

**(Z)-1-Bromo-4-(3,4-dichlorobut-2-en-2-yl)benzene (Z-3n)**: Obtained as a colorless liquid in 23% yield. Compound purified by silica gel column chromatography eluting with Hexanes.  $R_f=0.3$  (Hexanes). IR (ATR) 2924, 1738, 1487, 1075, 1009, 769, 621, 514  $\text{cm}^{-1}$ .  $^1\text{H}$  NMR (500 MHz,  $\text{CDCl}_3$ )  $\delta$  7.52 (d,  $J = 8.3$  Hz, 2H), 7.14 (d,  $J = 8.3$  Hz, 2H), 4.12 (s, 2H), 2.19 (s, 3H).  $^{13}\text{C}$  NMR (126 MHz,  $\text{CDCl}_3$ )  $\delta$  139.7, 139.4, 132.5, 129.8, 128.4, 122.8, 47.7, 23.4. HRMS-APCI calcd for  $\text{C}_{10}\text{H}_9\text{BrCl}_2$   $[\text{M}]^+$  277.9259, found 277.9260.

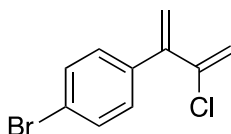

**1-Bromo-4-(3-chlorobuta-1,3-dien-2-yl)benzene (4n)**: Obtained as a colorless liquid in 31% yield. Compound purified by silica gel column chromatography eluting with Hexanes.  $R_f=0.7$  (Hexanes). IR (ATR) 2926, 1738, 1587, 1487, 1228, 1073, 831, 766, 527  $\text{cm}^{-1}$ .  $^1\text{H}$  NMR (500 MHz,  $\text{CDCl}_3$ )  $\delta$  7.48 (d,  $J = 8.5$  Hz, 2H), 7.20 (d,  $J = 8.5$  Hz, 2H), 5.78 (s, 1H), 5.54 (s, 1H), 5.35 (s, 1H), 5.28 (s, 1H).  $^{13}\text{C}$  NMR (126 MHz,  $\text{CDCl}_3$ )  $\delta$  146.0, 140.5, 138.6, 132.1, 130.8, 122.8, 119.8, 118.0. HRMS-APCI calcd for  $\text{C}_{10}\text{H}_8\text{BrCl}$   $[\text{M}+\text{H}]^+$  242.9580, found 242.9575.

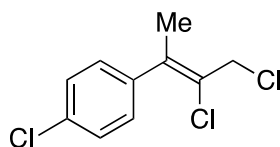

**(Z)-1-Chloro-4-(3,4-dichlorobut-2-en-2-yl)benzene (Z-3o)**: Obtained as a colorless liquid in 34% yield. Compound purified by silica gel column chromatography eluting with Hexanes.  $R_f=0.35$  (Hexanes). IR (ATR) 2925, 1738, 1593, 1489, 1373, 1217, 1091, 1014, 831, 712  $\text{cm}^{-1}$ .  $^1\text{H}$  NMR (500 MHz,  $\text{CDCl}_3$ )  $\delta$  7.36 (d,  $J = 8.4$  Hz, 2H), 7.20 (d,  $J = 8.4$  Hz, 2H), 4.12 (s, 2H), 2.19 (s, 3H).  $^{13}\text{C}$  NMR (126 MHz,  $\text{CDCl}_3$ )  $\delta$  139.4, 139.2, 134.7, 129.6, 129.5, 128.4, 47.7, 23.5. HRMS-APCI calcd for  $\text{C}_{10}\text{H}_9\text{Cl}_3$   $[\text{M}]^+$  233.9764, found 233.9765.

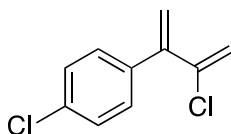

**1-chloro-4-(3-chlorobuta-1,3-dien-2-yl)benzene (4o):** Obtained as a colorless liquid in 38% yield. Compound purified by silica gel column chromatography eluting with Hexanes.  $R_f=0.45$  (Hexanes). IR (ATR) 2927, 1738, 1593, 1489, 1365, 1228, 1091, 1014, 906, 832, 527  $\text{cm}^{-1}$ .  $^1\text{H}$  NMR (500 MHz,  $\text{CDCl}_3$ )  $\delta$  7.32 (d,  $J = 8.5$  Hz, 2H), 7.26 (d,  $J = 8.5$  Hz, 2H), 5.78 (s, 1H), 5.54 (s, 1H), 5.34 (s, 1H), 5.28 (s, 1H).  $^{13}\text{C}$  NMR (126 MHz,  $\text{CDCl}_3$ )  $\delta$  146.0, 140.6, 138.1, 134.6, 130.5, 129.1, 119.8, 117.9. HRMS-APCI calcd for  $\text{C}_{10}\text{H}_8\text{Cl}_2$   $[\text{M}]^+$  197.9998, found 197.9998.

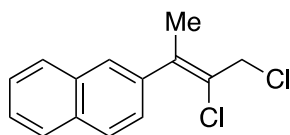

**(Z)-2-(3,4-Dichlorobut-2-en-2-yl)naphthalene (Z-3p):** Obtained as a colorless liquid in 37% yield. Compound purified by silica gel column chromatography eluting with dichloromethane and Hexanes.  $R_f=0.35$  (DCM: Hexanes= 15:85). IR (ATR) 2980, 1738, 1429, 1372, 1222, 819, 748, 699  $\text{cm}^{-1}$ .  $^1\text{H}$  NMR (500 MHz,  $\text{CDCl}_3$ )  $\delta$  7.87 – 7.84 (m, 3H), 7.75 (s, 1H), 7.58 – 7.48 (m, 2H), 7.36 (d,  $J = 9.8$  Hz, 1H), 4.21 (s, 2H), 2.30 (s, 3H).  $^{13}\text{C}$  NMR (126 MHz,  $\text{CDCl}_3$ )  $\delta$  140.6, 138.2, 133.7, 133.4, 129.1, 128.8, 128.4, 128.2, 127.3, 127.2, 127.1, 126.0, 48.0, 23.6. HRMS-APCI calcd for  $\text{C}_{10}\text{H}_{10}\text{Cl}_2$   $[\text{M}]^+$  200.0154, found 200.0155.

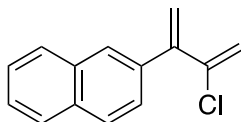

**2-(3-Chlorobuta-1,3-dien-2-yl)naphthalene (4p):** Obtained as a colorless liquid in 58% yield. Compound purified by silica gel column chromatography eluting with dichloromethane and Hexanes.  $R_f=0.65$  (DCM:Hexanes = 15:85). IR (ATR) 2970, 1738, 1434, 1229, 1216, 1107, 860, 750, 478  $\text{cm}^{-1}$ .  $^1\text{H}$  NMR (500 MHz,  $\text{CDCl}_3$ )  $\delta$  7.88 – 7.79 (m, 4H), 7.54 – 7.47 (m, 2H), 7.45 (d,  $J = 10.0$  Hz, 1H), 5.87 (s, 1H), 5.58 (s, 1H), 5.48 (s, 1H), 5.34 (s, 1H).  $^{13}\text{C}$  NMR (126 MHz,  $\text{CDCl}_3$ )  $\delta$  147.1, 140.9, 137.2, 133.8, 133.6, 128.7, 128.4, 128.3, 128.2, 127.2, 127.0, 126.9, 119.8, 118.0. HRMS-APCI calcd for  $\text{C}_{14}\text{H}_{11}\text{Cl}$   $[\text{M}]^+$  214.0544, found 214.0545.

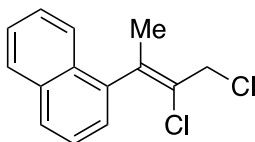

**(Z)-1-(3,4-Dichlorobut-2-en-2-yl)naphthalene (Z-3q):** Obtained as a colorless liquid in 20% yield. Compound purified by silica gel column chromatography eluting with dichloromethane and Hexanes.  $R_f=0.35$  (DCM: Hexanes= 15:85). IR (ATR) 2922, 1738, 1506, 1427, 1371, 1216, 1198, 1019, 801, 777, 701  $\text{cm}^{-1}$ .  $^1\text{H}$  NMR (500 MHz,  $\text{CDCl}_3$ )  $\delta$  7.88 (dd,  $J = 6.5, 3.1$  Hz, 1H), 7.83 (d,  $J = 8.3$  Hz, 1H), 7.76 – 7.70 (m, 1H), 7.55 – 7.50 (m, 2H), 7.48 (t,  $J = 7.6$  Hz, 1H), 7.31 (d,  $J = 7.0$  Hz, 1H), 3.98 (s, 2H), 2.28 (s, 3H).  $^{13}\text{C}$  NMR (126 MHz,  $\text{CDCl}_3$ )  $\delta$  139.2, 138.3, 134.5, 131.1, 129.2, 129.0, 129.0, 127.3, 126.9, 126.2, 125.8, 125.6, 47.5, 23.6. HRMS-APCI calcd for  $\text{C}_{14}\text{H}_{12}\text{Cl}_2$   $[\text{M}]^+$  250.0311, found 250.0313.

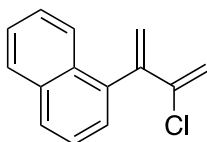

**1-(3-Chlorobuta-1,3-dien-2-yl)naphthalene (4q):** Obtained as a colorless liquid in 65% yield. Compound purified by silica gel column chromatography eluting with dichloromethane and Hexanes.  $R_f=0.65$  (DCM:Hexanes= 15:85). IR (ATR) 2926, 1738, 1506, 1400, 1370, 1216, 1152, 1089, 888, 802, 778  $\text{cm}^{-1}$ .  $^1\text{H}$



NMR (500 MHz,  $\text{CDCl}_3$ )  $\delta$  7.85 (m, 3H), 7.47 (m, 3H), 7.37 (d,  $J$  = 7.0 Hz, 1H), 6.18 (s, 1H), 5.44 (s, 2H), 4.90 (s, 1H).  $^{13}\text{C}$  NMR (126 MHz,  $\text{CDCl}_3$ )  $\delta$  144.9, 140.8, 137.9, 134.1, 132.4, 128.9, 128.8, 127.6, 126.8, 126.6, 126.5, 125.9, 121.7, 118.3. HRMS-APCI calcd for  $\text{C}_{14}\text{H}_{11}\text{Cl}$   $[\text{M}]^+$  214.0544, found 214.0541.

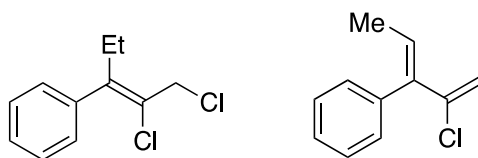

**(Z)-(1,2-Dichloropent-2-en-3-yl)benzene (Z-3r)** and **(E)-(2-chloropenta-1,3-dien-3-yl)benzene (4r)**: Obtained as a colorless liquid in 40% yield of **Z-3r** and 25% yield of **4r**. Compound purified by silica gel column chromatography eluting with Hexanes.  $R_f$ =0.45 (Hexanes).  $^1\text{H}$  NMR (500 MHz,  $\text{CDCl}_3$ )  $\delta$  7.41 (d,  $J$  = 7.3 Hz, 3H), 7.38 (d,  $J$  = 7.5 Hz, 3H), 7.33 (t,  $J$  = 7.4 Hz, 3H), 7.28 (d,  $J$  = 7.1 Hz, 1H), 7.23 – 7.20 (m, 3H), 6.10 (q,  $J$  = 7.0 Hz, 1H, **4r**), 5.72 (s, 1H, **4r**), 5.38 (s, 1H, **4r**), 4.09 (s, 3H, **Z-3r**), 2.61 (q,  $J$  = 7.5 Hz, 3H, **Z-3r**), 1.95 (d,  $J$  = 7.0 Hz, 3H, **4r**), 0.96 (t,  $J$  = 7.5 Hz, 5H, **Z-3r**).  $^{13}\text{C}$  NMR (126 MHz,  $\text{CDCl}_3$ )  $\delta$  (**Z-3r**): 140.9, 139.5, 129.2, 128.6, 127.7, 127.1, 48.1, 30.0, 11.9; (**4r**): 146.2, 139.1, 137.3, 129.0, 128.6, 128.2, 127.2, 118.6, 16.3.

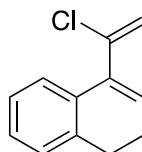

**4-(1-Chlorovinyl)-1,2-dihydronaphthalene (4t)**: Obtained as a colorless liquid in 74% yield. Compound purified by silica gel column chromatography eluting with Hexanes.  $R_f$ =0.45 (Hexanes). IR (ATR) 2936, 1737, 1489, 1366, 1233, 1217, 894, 759, 736, 589  $\text{cm}^{-1}$ .  $^1\text{H}$  NMR (500 MHz,  $\text{CDCl}_3$ )  $\delta$  7.33 (d,  $J$  = 7.2 Hz, 1H), 7.24 – 7.19 (m, 1H), 7.17 (td,  $J$  = 6.9, 3.3 Hz, 2H), 6.30 (t,  $J$  = 4.7 Hz, 1H), 5.53 (s, 1H), 5.50 (s, 1H), 2.78 (t,  $J$  = 8.0 Hz, 2H), 2.34 (m, 2H).  $^{13}\text{C}$  NMR (126 MHz,  $\text{CDCl}_3$ )  $\delta$  140.1, 138.4, 137.0, 132.6, 130.6, 128.3, 128.2, 127.1, 125.9, 116.4, 28.3, 23.8. HRMS-APCI calcd for  $\text{C}_{12}\text{H}_{11}\text{Cl}$   $[\text{M}]^+$  190.0544, found 190.0541.

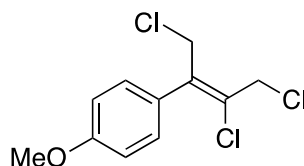

**(E)-1-Methoxy-4-(1,3,4-trichlorobut-2-en-2-yl)benzene (5u)**: Obtained as a colorless liquid in 53% yield. Compound purified by silica gel column chromatography eluting with dichloromethane and Hexanes.  $R_f$ =0.30 (DCM: Hexanes= 15:85). IR (ATR) 2931, 1738, 1606, 1510, 1288, 1248, 1177, 1094, 835, 705, 603  $\text{cm}^{-1}$ .  $^1\text{H}$  NMR (500 MHz,  $\text{CDCl}_3$ )  $\delta$  7.26 (d,  $J$  = 8.8 Hz, 2H), 6.94 (d,  $J$  = 8.8 Hz, 2H), 4.47 (s, 2H), 4.14 (s, 2H), 3.83 (s, 3H).  $^{13}\text{C}$  NMR (126 MHz,  $\text{CDCl}_3$ )  $\delta$  160.6, 139.2, 132.6, 130.1, 129.3, 114.9, 56.0, 47.3, 46.3. HRMS-APCI calcd for  $\text{C}_{11}\text{H}_{11}\text{OCl}_3$   $[\text{M}]^+$  263.9870, found 263.9870.

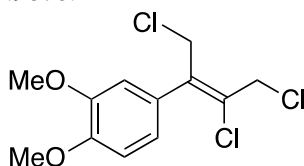

**(E)-1,2-Dimethoxy-4-(1,3,4-trichlorobut-2-en-2-yl)benzene (5v)**: Obtained as a white solid in 30% yield. Compound purified by silica gel column chromatography eluting with EtOAc and Hexanes.  $R_f$ =0.45 (EtOAc: Hexanes= 1:10). IR (ATR) 2879, 2183, 1589, 1481, 1292, 1111.7, 1050, 949, 596  $\text{cm}^{-1}$ .  $^1\text{H}$  NMR (500 MHz,  $\text{CDCl}_3$ )  $\delta$  6.93 (s, 2H), 6.92 (s, 1H), 4.51 (s, 2H), 4.20 (s, 2H), 3.94 (s, 3H), 3.93 (s, 4H).  $^{13}\text{C}$  NMR (126 MHz,  $\text{CDCl}_3$ )  $\delta$  149.4, 149.0, 138.7, 132.1, 129.0, 120.5, 111.3, 111.2, 56.0, 55.9, 46.9, 45.5. HRMS-APCI calcd for  $\text{C}_{12}\text{H}_{13}\text{O}_2\text{Cl}_3$   $[\text{M}-\text{Cl}]^+$  224.0599, found 224.0601.

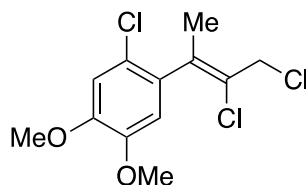

**(Z)-1-Chloro-2-(3,4-dichlorobut-2-en-2-yl)-4,5-dimethoxybenzene (6v):** Obtained as a white solid in 37% yield. Compound purified by silica gel column chromatography eluting with EtOAc and Hexanes.  $R_f$ =0.35 (EtOAc: Hexanes= 1:10). IR (ATR) 2997, 2833, 1738, 1605, 1508, 1489, 1333, 1148, 841, 571  $\text{cm}^{-1}$ .  $^1\text{H}$  NMR (500 MHz,  $\text{CDCl}_3$ )  $\delta$  6.96 (s, 1H), 6.79 (s, 1H), 3.92 (s, 3H), 3.89 (s, 3H), 3.43 (s, 2H), 2.09 (s, 3H).  $^{13}\text{C}$  NMR (126 MHz,  $\text{CDCl}_3$ )  $\delta$  149.1, 147.9, 138.3, 135.0, 133.1, 129.9, 108.5, 103.4, 57.0, 56.9, 42.9, 11.1. HRMS-APCI calcd for  $\text{C}_{12}\text{H}_{13}\text{O}_2\text{Cl}_3$   $[\text{M}]^+$  293.9981, found 293.9981.

### Synthesis of 4-(propa-1,2-dien-1-yl-3,3- $\text{d}_2$ )-1,1'-biphenyl ([D<sub>2</sub>]-2b)<sup>1</sup>:

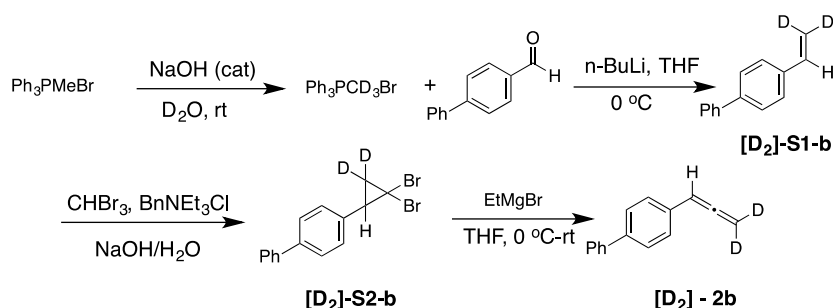

**Ph<sub>3</sub>PCD<sub>3</sub>Br:**<sup>10</sup> To a flask with a magnetic stir bar was added Ph<sub>3</sub>PMeBr (530mg, 1.5 mmol, 1.0 equiv), D<sub>2</sub>O (2 mL), and NaOH (30 mg, 0.75 mmol, 0.5 equiv). The reaction mixture was stirred under nitrogen atmosphere, and after 24 h,  $\text{CH}_2\text{Cl}_2$  (5 mL) was added to the solution and organic layer was collected and dried with  $\text{Mg}_2\text{SO}_4$ . Then added hexanes (10 mL) to the resulting solution and storing at  $-5^\circ\text{C}$  for 24 h afforded colorless crystals (460 mg, 86% yield).  $^1\text{H}$  NMR (300 MHz,  $\text{CDCl}_3$ )  $\delta$  7.71 (m, 15H).  $^2\text{H}$  NMR (46 MHz,  $\text{CHCl}_3$ )  $\delta$  3.41 (s, 3H).

**[D<sub>2</sub>]-S1-b.**<sup>10</sup> In an oven dried flask, methyl triphenylphosphonium bromide (1.0 mmol, 356 mg, 1.0 equiv) was added with THF (2.5 mL/mmol). Then 2.6M *n*-BuLi (1.2 mmol, 0.4 mL, 1.2 equiv) was added and the resulting yellow suspension was stirred in an ice-bath for 60 minutes. To this suspension, a solution of [1,1'-biphenyl]-4-carbaldehyde (1.0 mmol, 182 mg, 1.0 equiv.) was added in one portion and the resulting mixture was warmed to room temperature and further stirred at room temperature overnight. Water and DCM were added to the reaction mixture, separated and the aqueous phase was extracted with DCM ( $3 \times 15$  mL). The combined organic phases were washed with saturated NaCl solution, dried over  $\text{Na}_2\text{SO}_4$  and the solvent removed under reduced pressure. The reaction mixture was purified by column chromatography over silica gel (200–300 mesh) using Hexanes as eluent afforded colorless solid **[D<sub>2</sub>]-S1-b** (135 mg) in 74% yield.  $^1\text{H}$  NMR (500 MHz,  $\text{CDCl}_3$ )  $\delta$  7.60 (d,  $J$  = 7.6 Hz, 2H), 7.57 (d,  $J$  = 7.9 Hz, 2H), 7.49 (d,  $J$  = 8.0 Hz, 2H), 7.44 (t,  $J$  = 7.6 Hz, 2H), 7.35 (t,  $J$  = 7.5 Hz, 1H), 6.75 (s, 1H).  $^{13}\text{C}$  NMR (126 MHz,  $\text{CDCl}_3$ )  $\delta$  141.4, 141.2, 137.2, 137.0, 136.9, 129.4, 128.0, 127.9, 127.6, 127.3.  $^2\text{H}$  NMR (46 MHz,  $\text{CHCl}_3$ )  $\delta$  5.95 (d,  $J$  = 2.7 Hz, 1H), 5.42 (d,  $J$  = 2.7 Hz, 1H).

**[D<sub>2</sub>]-S2-b** and **[D<sub>2</sub>]-2b** were prepared following the general procedure for allene synthesis given above<sup>[2]</sup>.

**4-(2,2-Dibromocyclopropyl-3,3- $\text{d}_2$ )-1,1'-biphenyl ([D<sub>2</sub>]-S2-b):** Obtained as white solid in 99% yield;  $^1\text{H}$  NMR (300 MHz,  $\text{CDCl}_3$ )  $\delta$  7.61 – 7.57 (m, 4H), 7.43 (t,  $J$  = 7.5 Hz, 2H), 7.36 – 7.30 (m, 3H), 6.81 (s, 1H).  $^{13}\text{C}$  NMR (75 MHz,  $\text{CDCl}_3$ )  $\delta$  140.4, 140.3, 134.9, 129.2, 128.7, 127.3, 126.9, 126.9, 35.4, 28.2, 9.6.  $^2\text{H}$  NMR (46

MHz, CHCl<sub>3</sub>)  $\delta$  2.21 (d,  $J$  = 5.6 Hz, 2H).

**4-(Propa-1,2-dien-1-yl-3,3-*d*<sub>2</sub>)-1,1'-biphenyl ([D<sub>2</sub>]-2b):** Obtained as white solid in 72% yield <sup>1</sup>H NMR (300 MHz, CDCl<sub>3</sub>)  $\delta$  7.60 (d,  $J$  = 7.7 Hz, 2H), 7.55 (d,  $J$  = 7.9 Hz, 2H), 7.39 – 7.31 (m, 3H), 6.22 (s, 1H). <sup>13</sup>C NMR (75 MHz, CDCl<sub>3</sub>)  $\delta$  210.0, 140.7, 139.6, 132.9, 128.7, 127.2, 127.1, 127.0, 126.8, 93.7, 78.8. <sup>2</sup>H NMR (46 MHz, CHCl<sub>3</sub>)  $\delta$  5.32 (s, 2H).

**Synthesis of 4-(2,3-dichloroprop-1-en-1-yl-3,3-*d*<sub>2</sub>)-1,1'-biphenyl ([D<sub>2</sub>]-3b):**

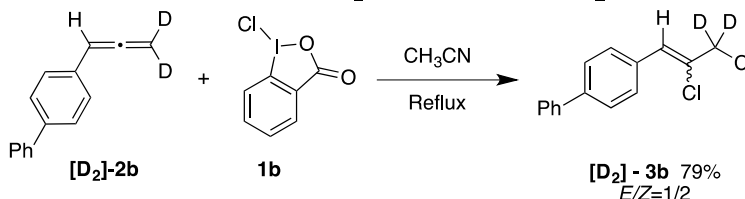

To an oven dried flask with a magnetic stir bar was charged 4-(propa-1,2-dien-1-yl-3,3-*d*<sub>2</sub>)-1,1'-biphenyl ([D<sub>2</sub>]-2b, 0.2 mmol, 39 mg, 1.0 equiv), 1-chloro-1,2-benziodoxol-3-one (1b, 0.44 mmol, 133 mg, 2.2 equiv) and acetonitrile (2 mL), and the resulting solution was placed under a nitrogen atmosphere. The reaction flask was immersed in a preheated 85 °C oil bath, and stirring. The reaction was monitored by TLC analysis, and upon consumption of the [D<sub>2</sub>]-2b (10–30 min), the reaction mixture was cooled to room temperature and concentrated by under vacuum by rotary evaporation. The resulting crude product mixture was purified by silica gel chromatography to provide [D<sub>2</sub>]-3b in 79% yield ( $E/Z=1/2$ ). (*E*)-[D<sub>2</sub>]-3b: <sup>1</sup>H NMR (300 MHz, CDCl<sub>3</sub>)  $\delta$  7.67 – 7.48 (m, 4H), 7.52 – 7.30 (m, 5H), 6.94 (s, 1H). (*Z*)-[D<sub>2</sub>]-3b: <sup>1</sup>H NMR (300 MHz, CDCl<sub>3</sub>)  $\delta$  7.73 (d,  $J$  = 8.0 Hz, 2H), 7.60 (d,  $J$  = 7.9 Hz, 4H), 7.44 (t,  $J$  = 7.5 Hz, 2H), 7.40 – 7.30 (m, 1H), 6.86 (s, 1H).

1. Z. Zhao, L. Racicot and G. K. Murphy, *Angew. Chem., Int. Ed.*, 2017, **56**, 11620.
2. J. An, X. Tang, J. Moore, W. Lewis and R. M. Denton, *Tetrahedron*, 2013, **69**, 8769.
3. J. Liu, Z. Han, X. Wang, Z. Wang and K. Ding, *J. Am. Chem. Soc.*, 2015, **137**, 15346.
4. (a) M. Bergeron, T. Johnson and J. F. Paquin, *Angew. Chem.*, 2011, **123**, 11308; (b) J. Yang, A. Mao, Z. Yue, W. Zhu, X. Luo, C. Zhu, Y. Xiao and J. Zhang, *Chem. Commun.*, 2015, **51**, 8326.
5. J. Liu, Q. Liu, R. Franke, R. Jackstell and M. Beller, *J. Am. Chem. Soc.*, 2015, **137**, 8556.
6. X. Yang, Y. She, Y. Chong, H. Zhai, H. Zhu, B. Chen, G. Huang and R. Yan, *Adv. Synth. Catal.*, 2016, **358**, 3130.
7. S. Ma and A. Zhang, *J. Org. Chem.*, 1998, **63**, 9601.
8. S. Yamazaki, Y. Yamamoto, Y. Fukushima, M. Takebayashi, T. Ukai and Y. Mikata, *J. Org. Chem.*, 2010, **75**, 5216.
9. G. Zhang, T. Xiong, Z. Wang, G. Xu, X. Wang and Q. Zhang, *Angew. Chem., Int. Ed.*, 2015, **54**, 12649.
10. S. Fortier, J. R. Walensky, G. Wu and T. W. Hayton, *J. Am. Chem. Soc.*, 2011, **133**, 6894.
11. L. Liu, J.; Nie, M.; Zhou, Q.; Gao, S.; Jiang, W.; Chung, L. W.; Tang, W.; Ding, K., *Chemical Science* **2017**, 8, 5161-5165.
12. Laali, K. K.; Nandi, G. C.; Bunge, S. D., *Tetrahedron Lett.* **2014**, 55, 2401-2405.

**$^1\text{H}$  NMR,  $^{19}\text{F}$  and  $^{13}\text{C}$  NMR spectra:**

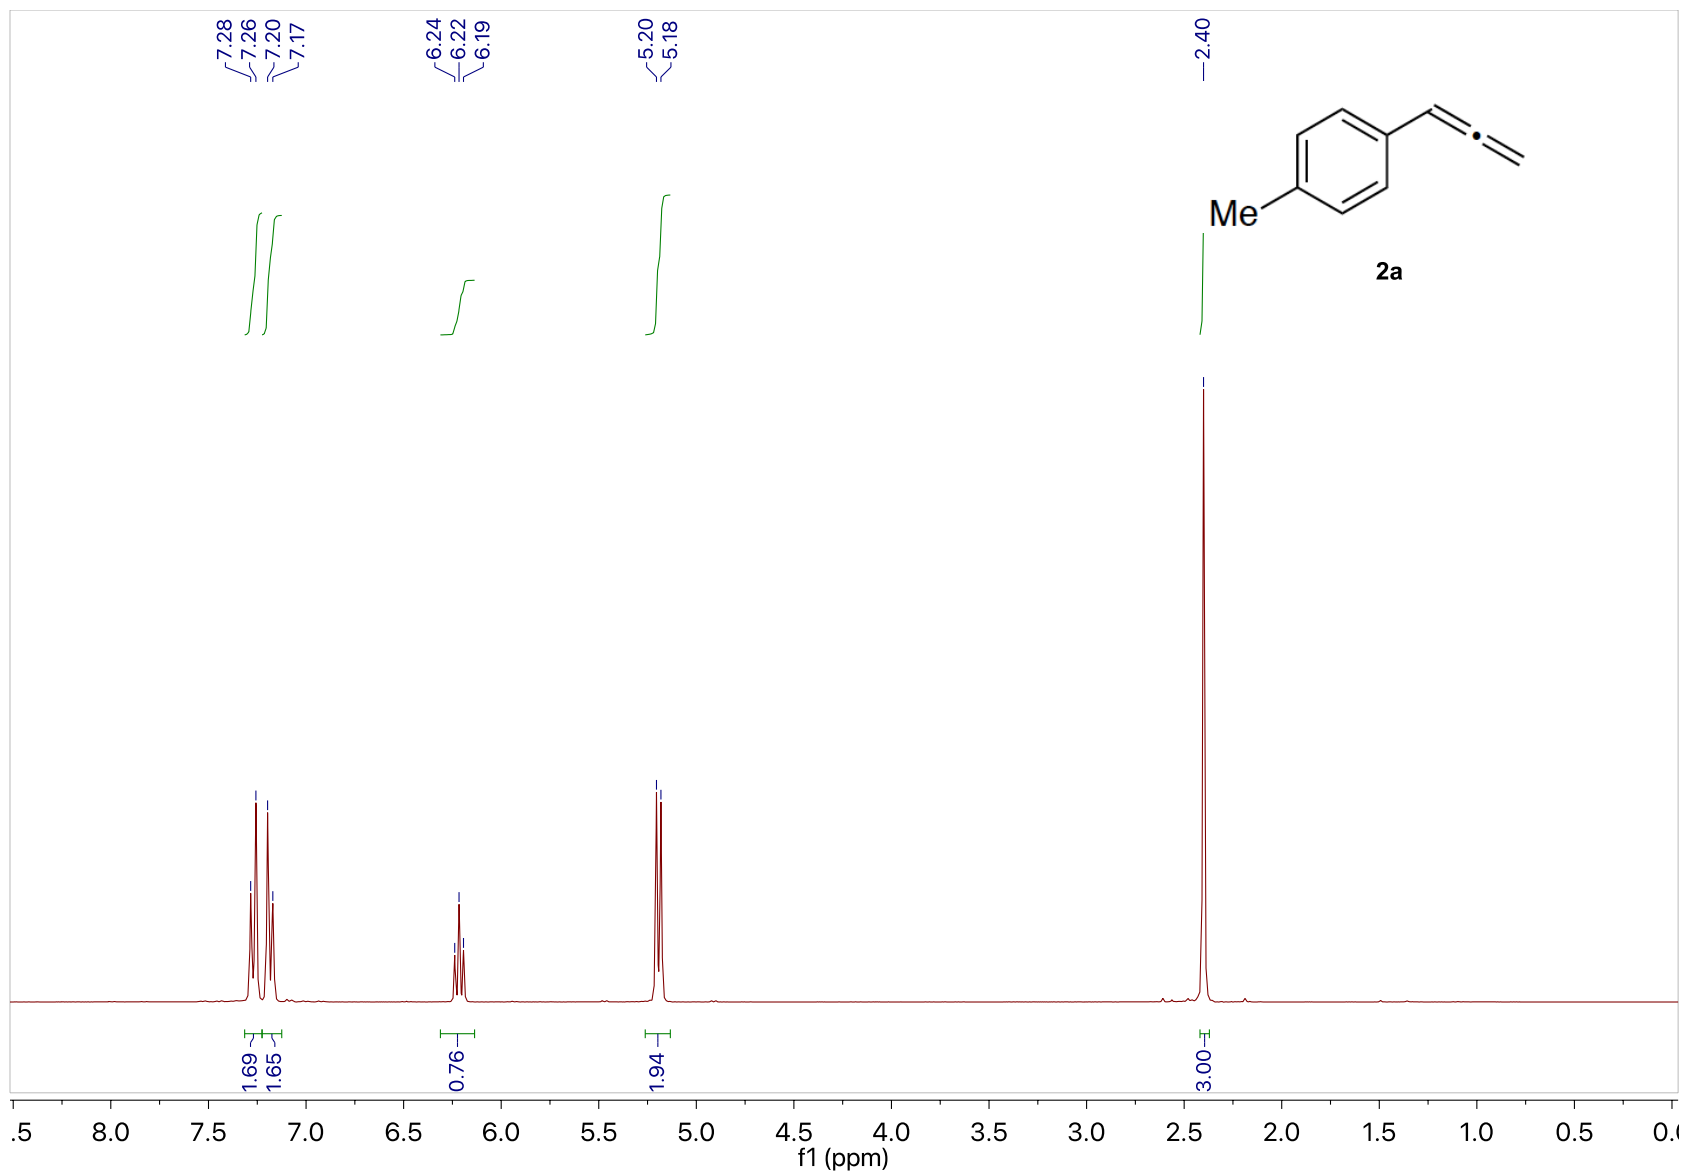

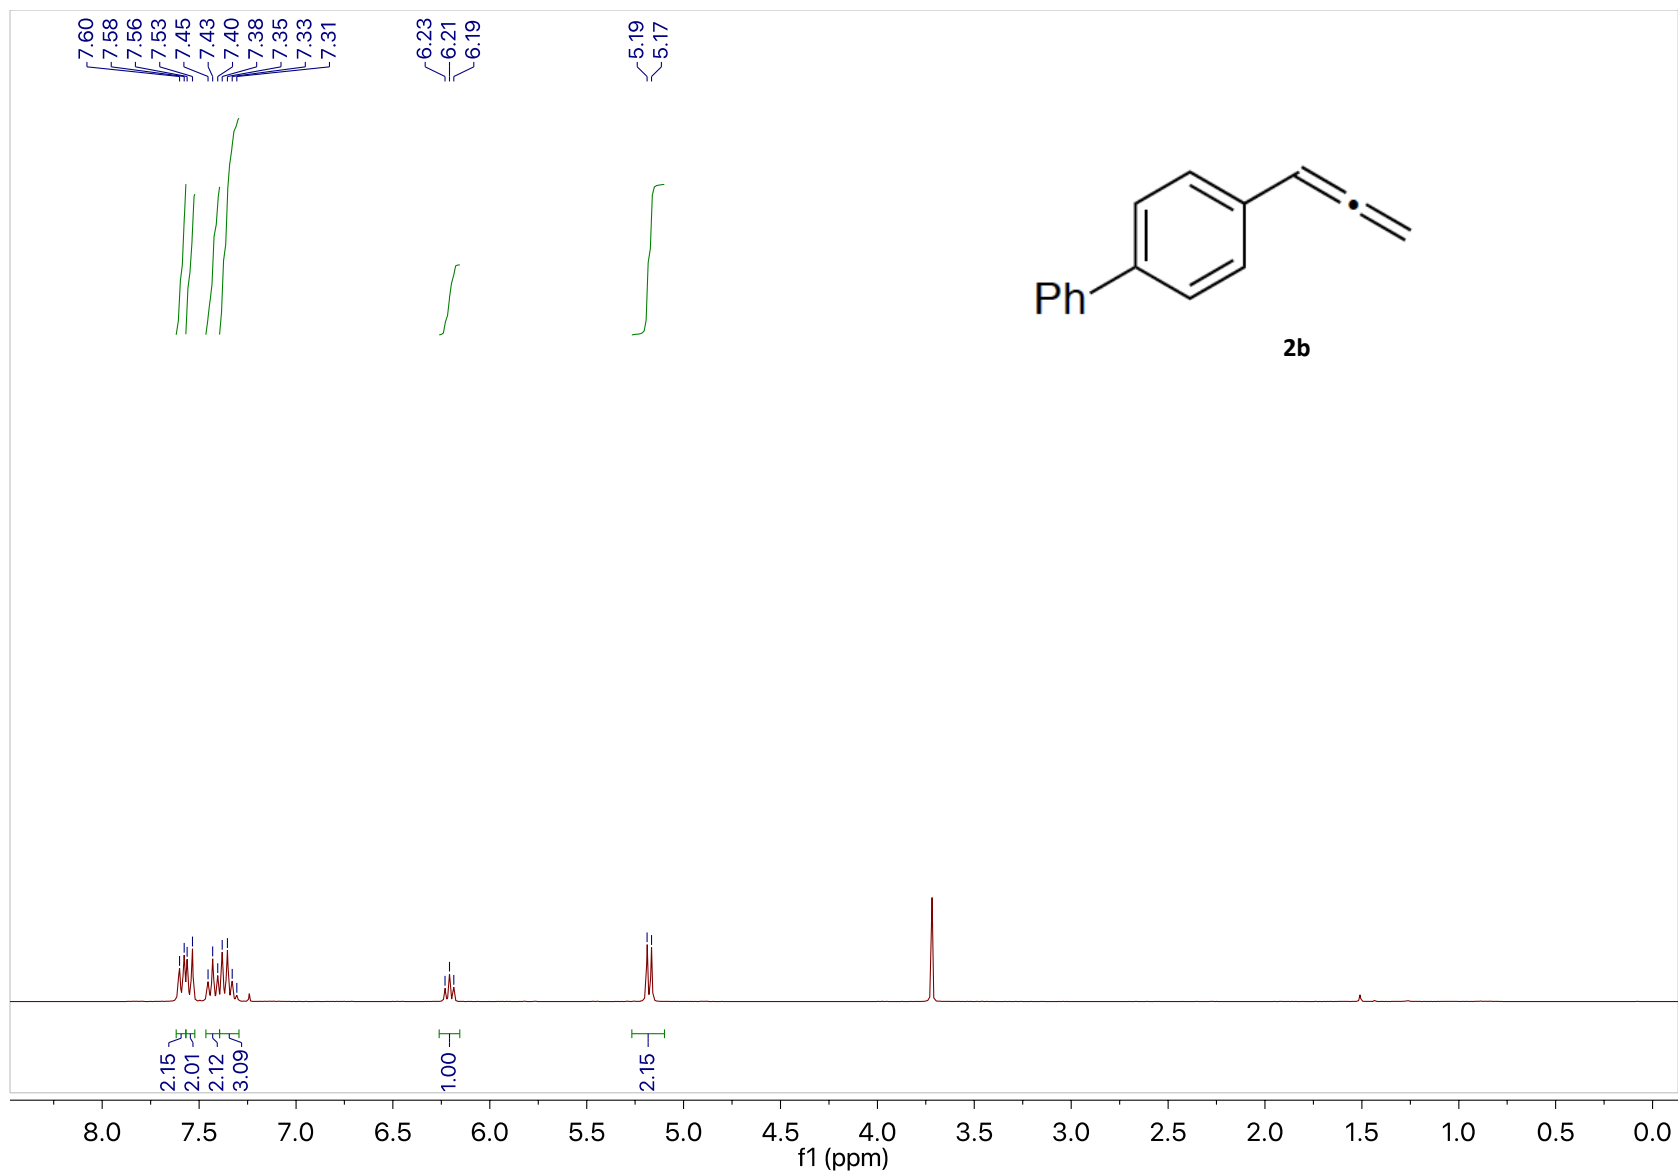

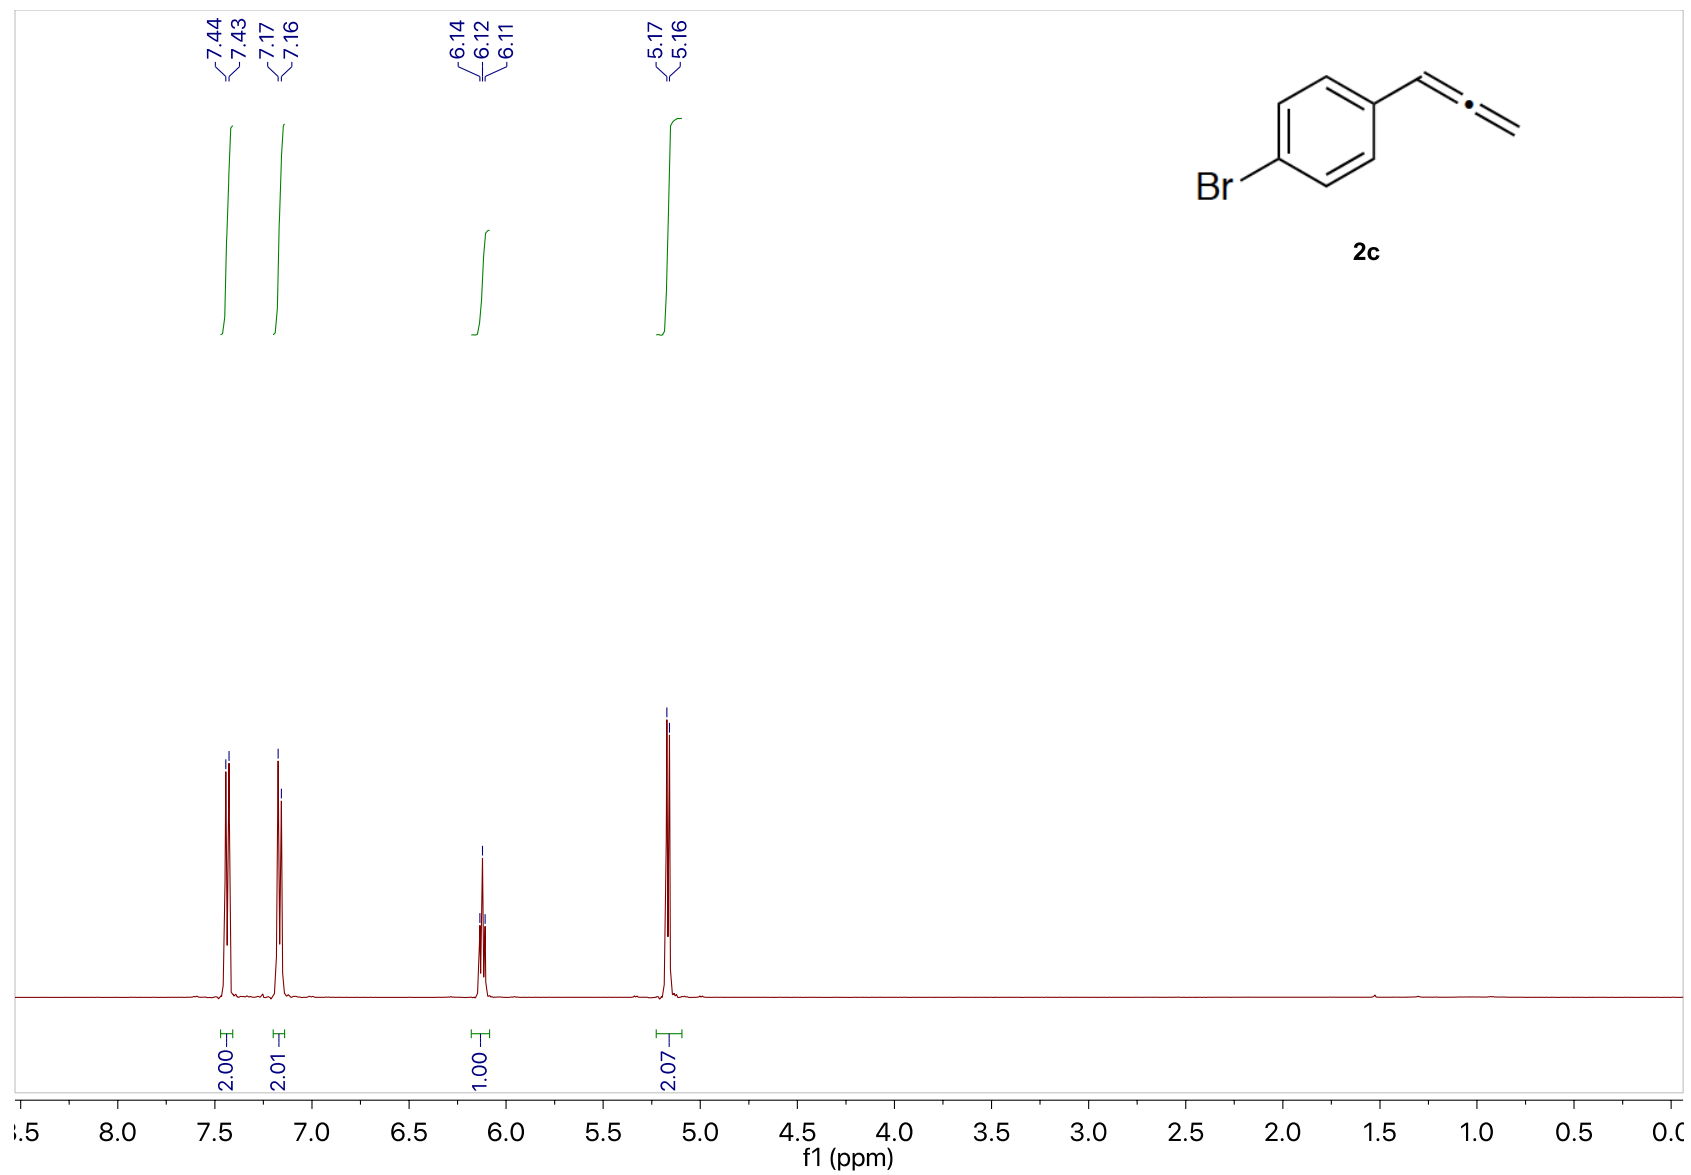

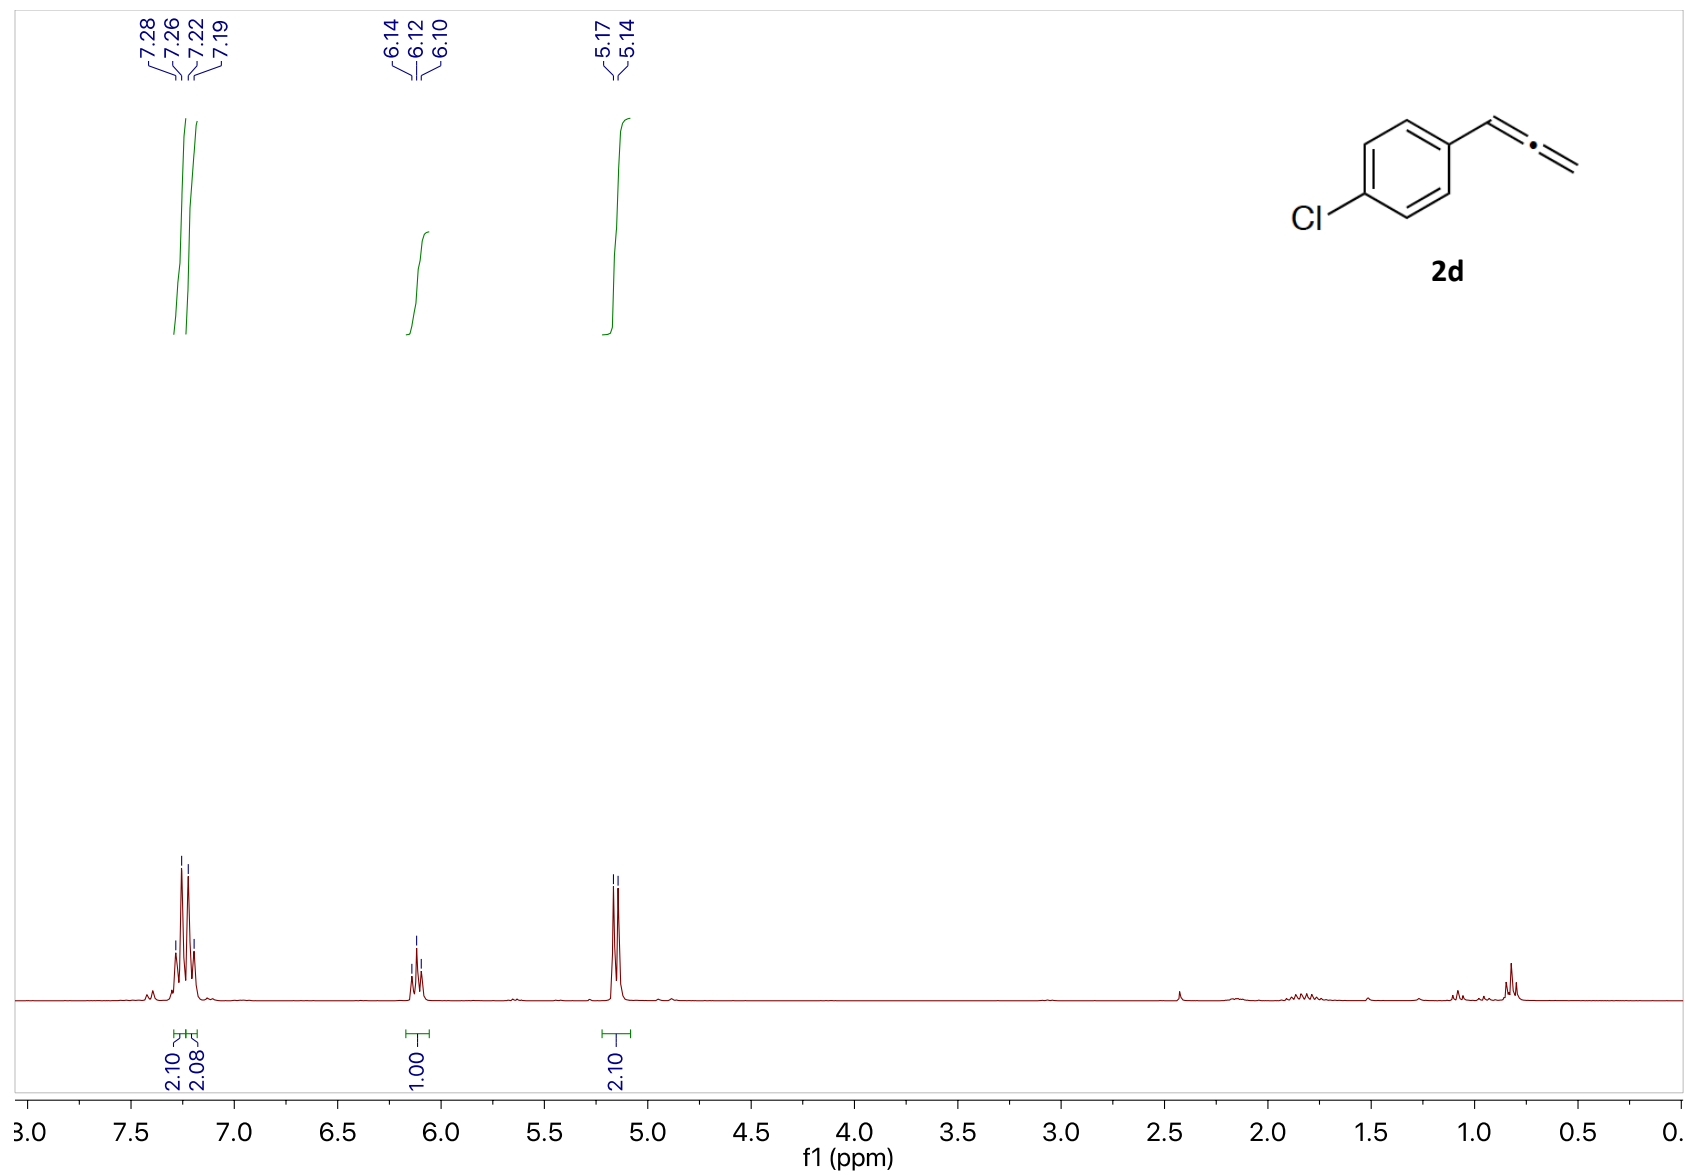



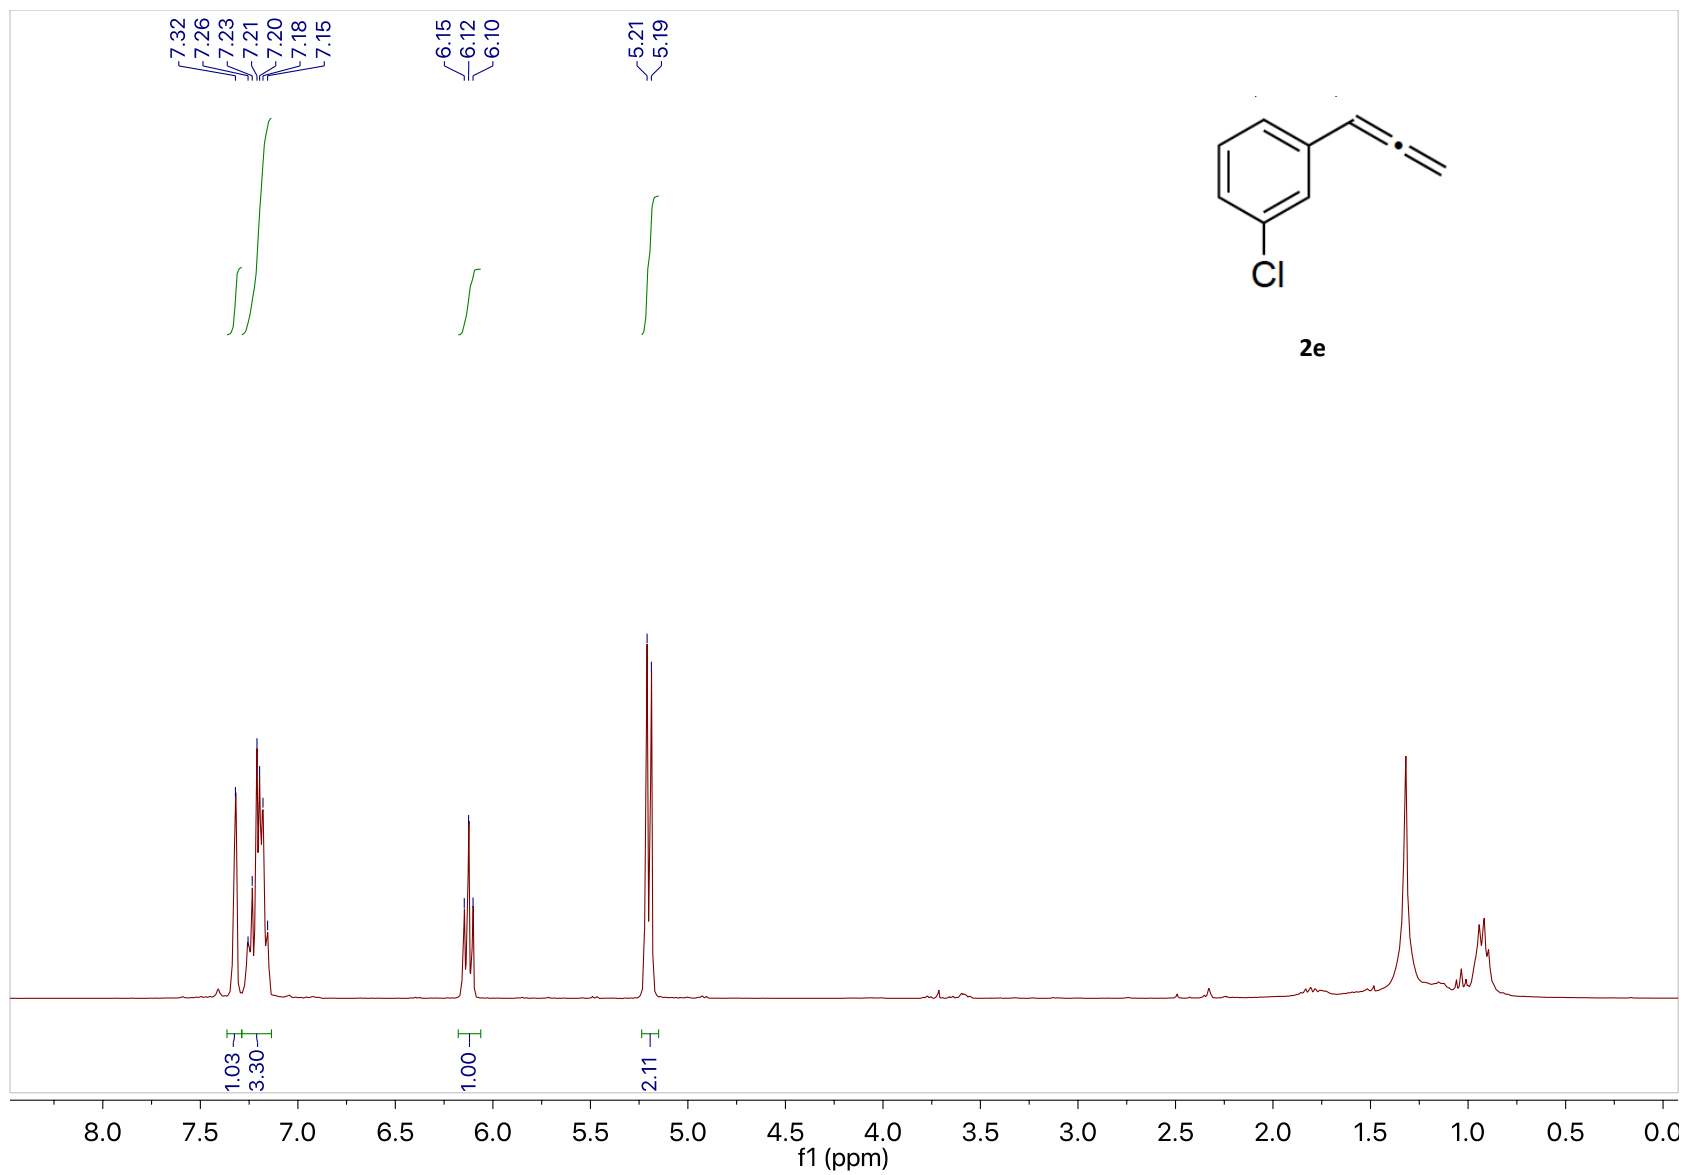

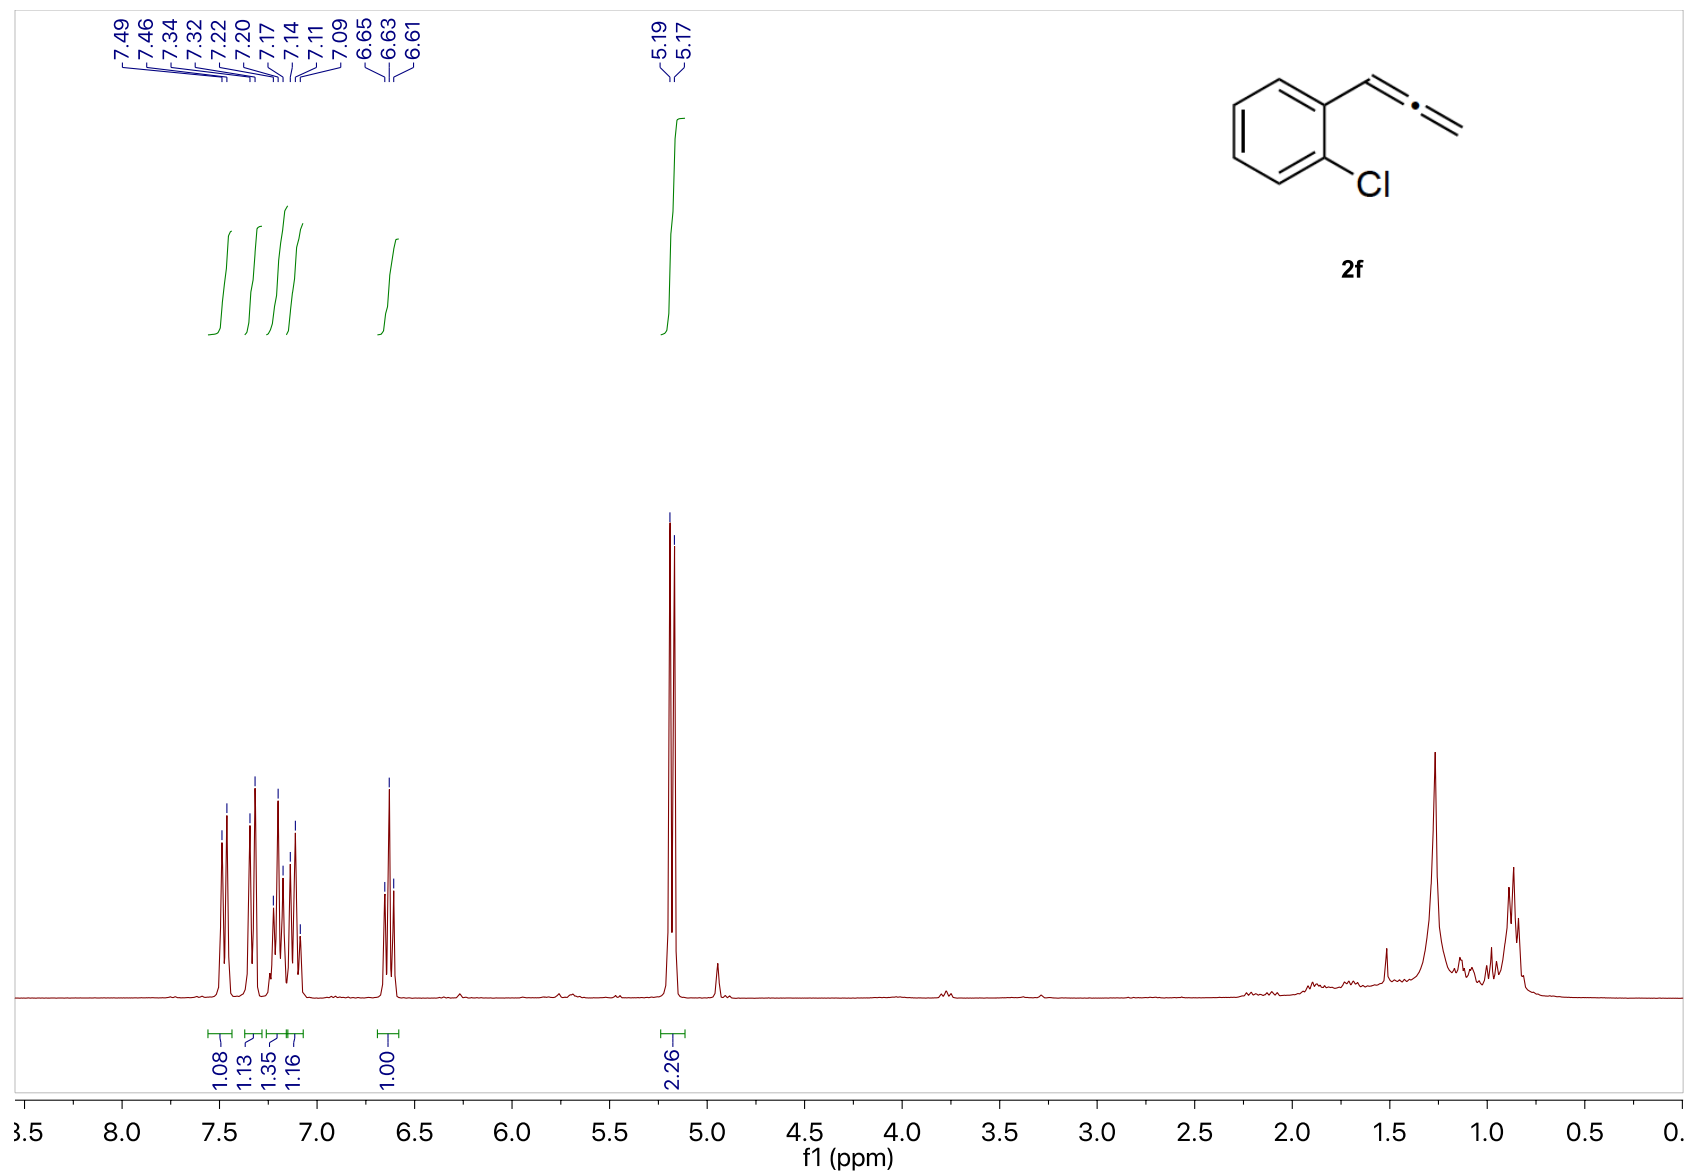

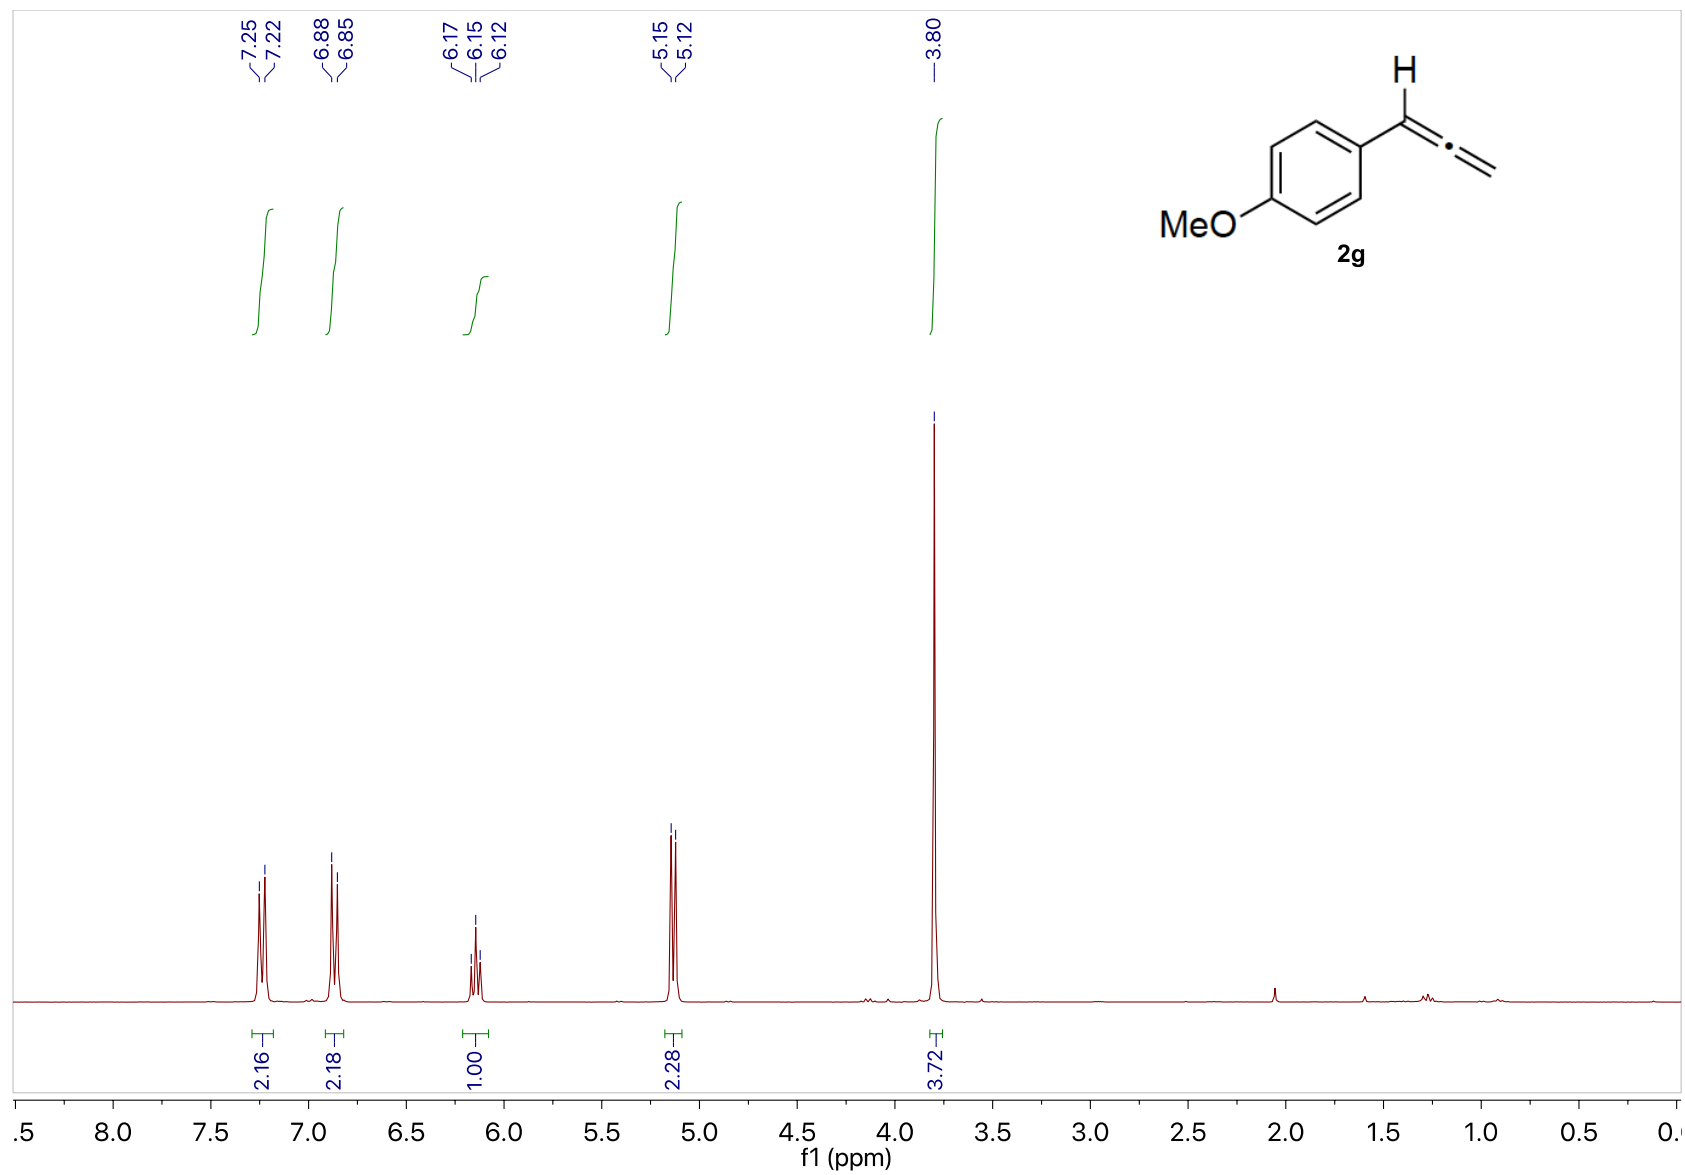

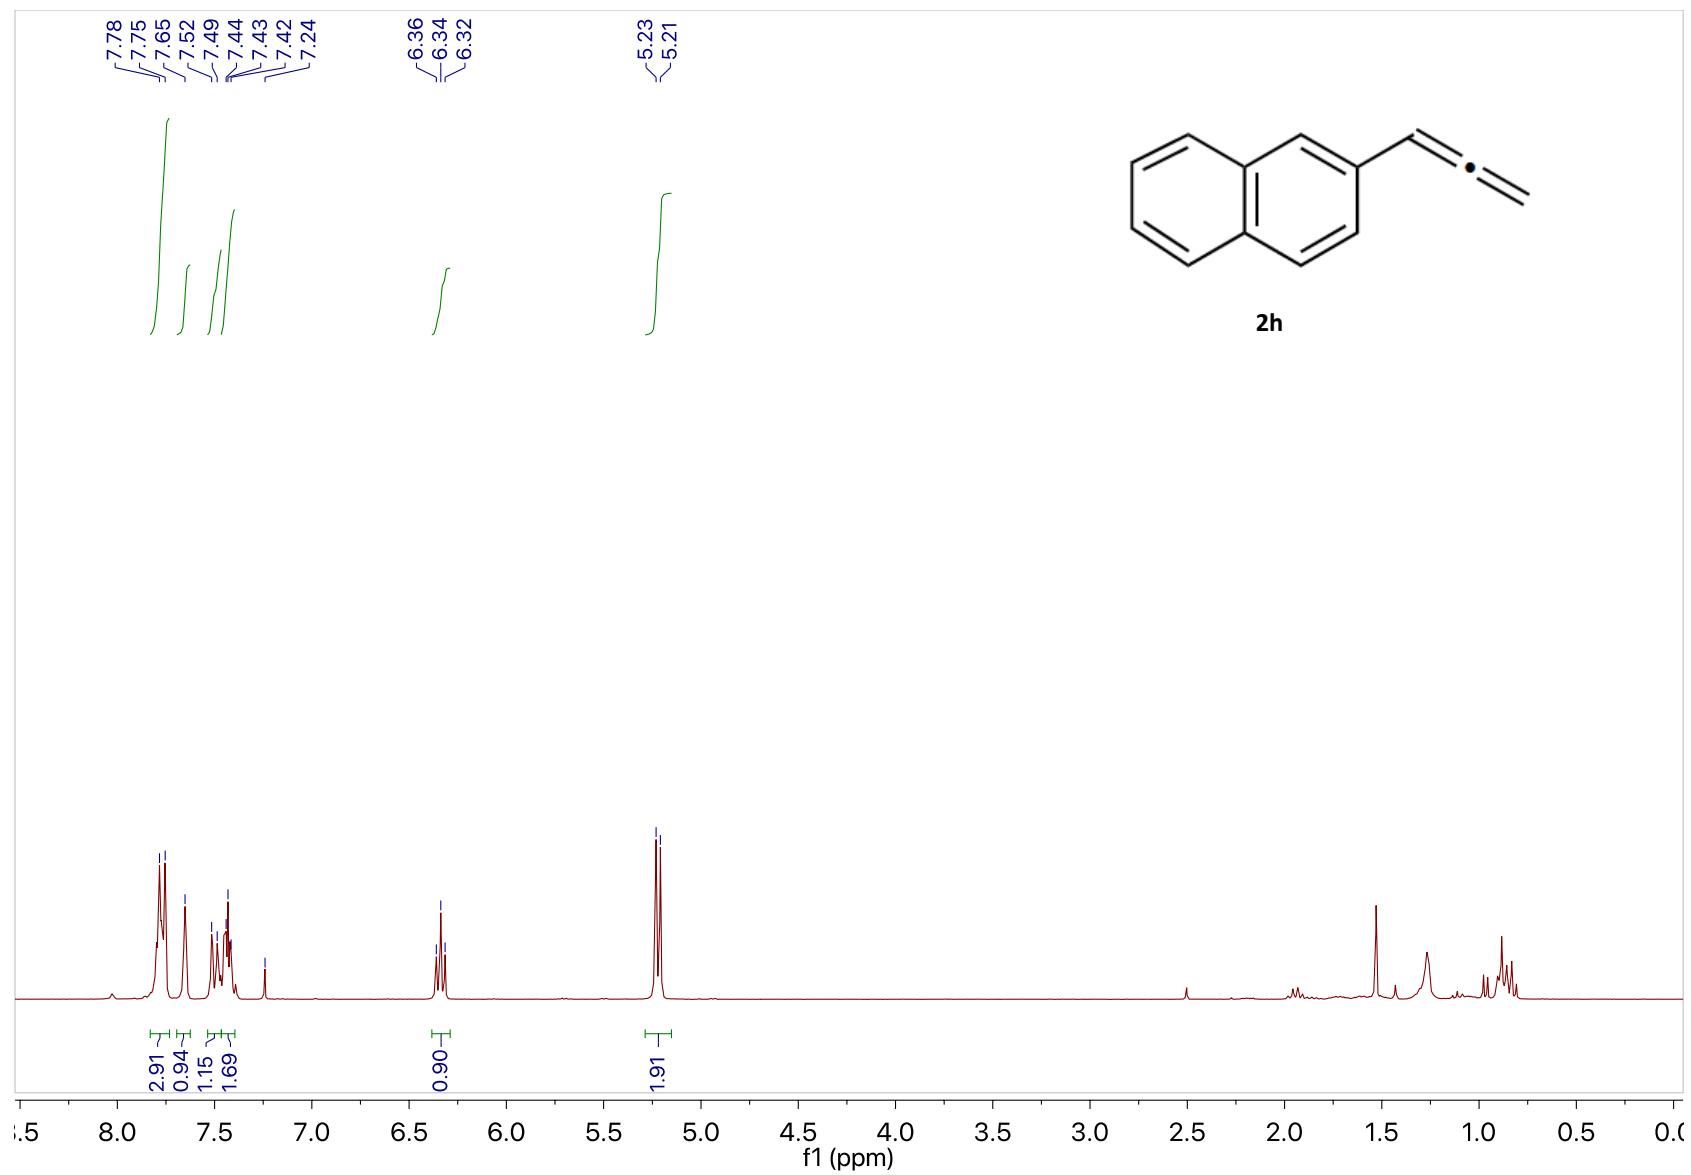

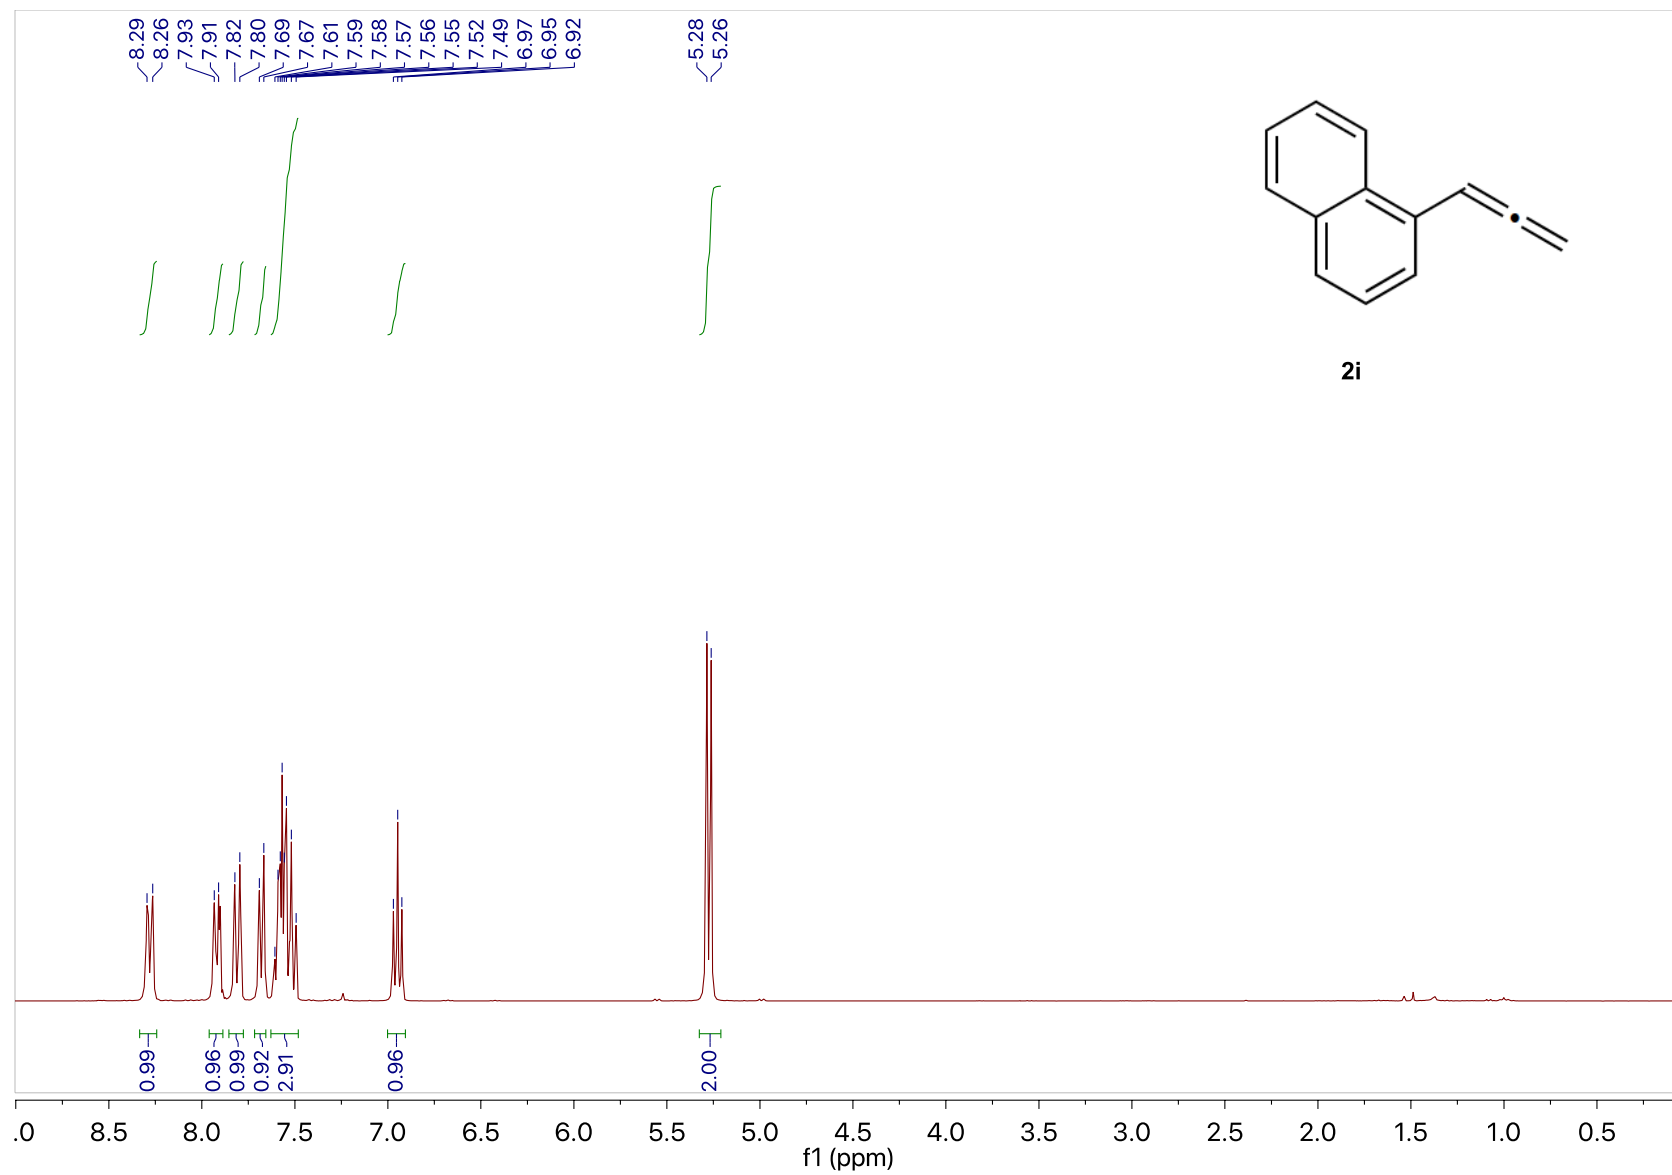

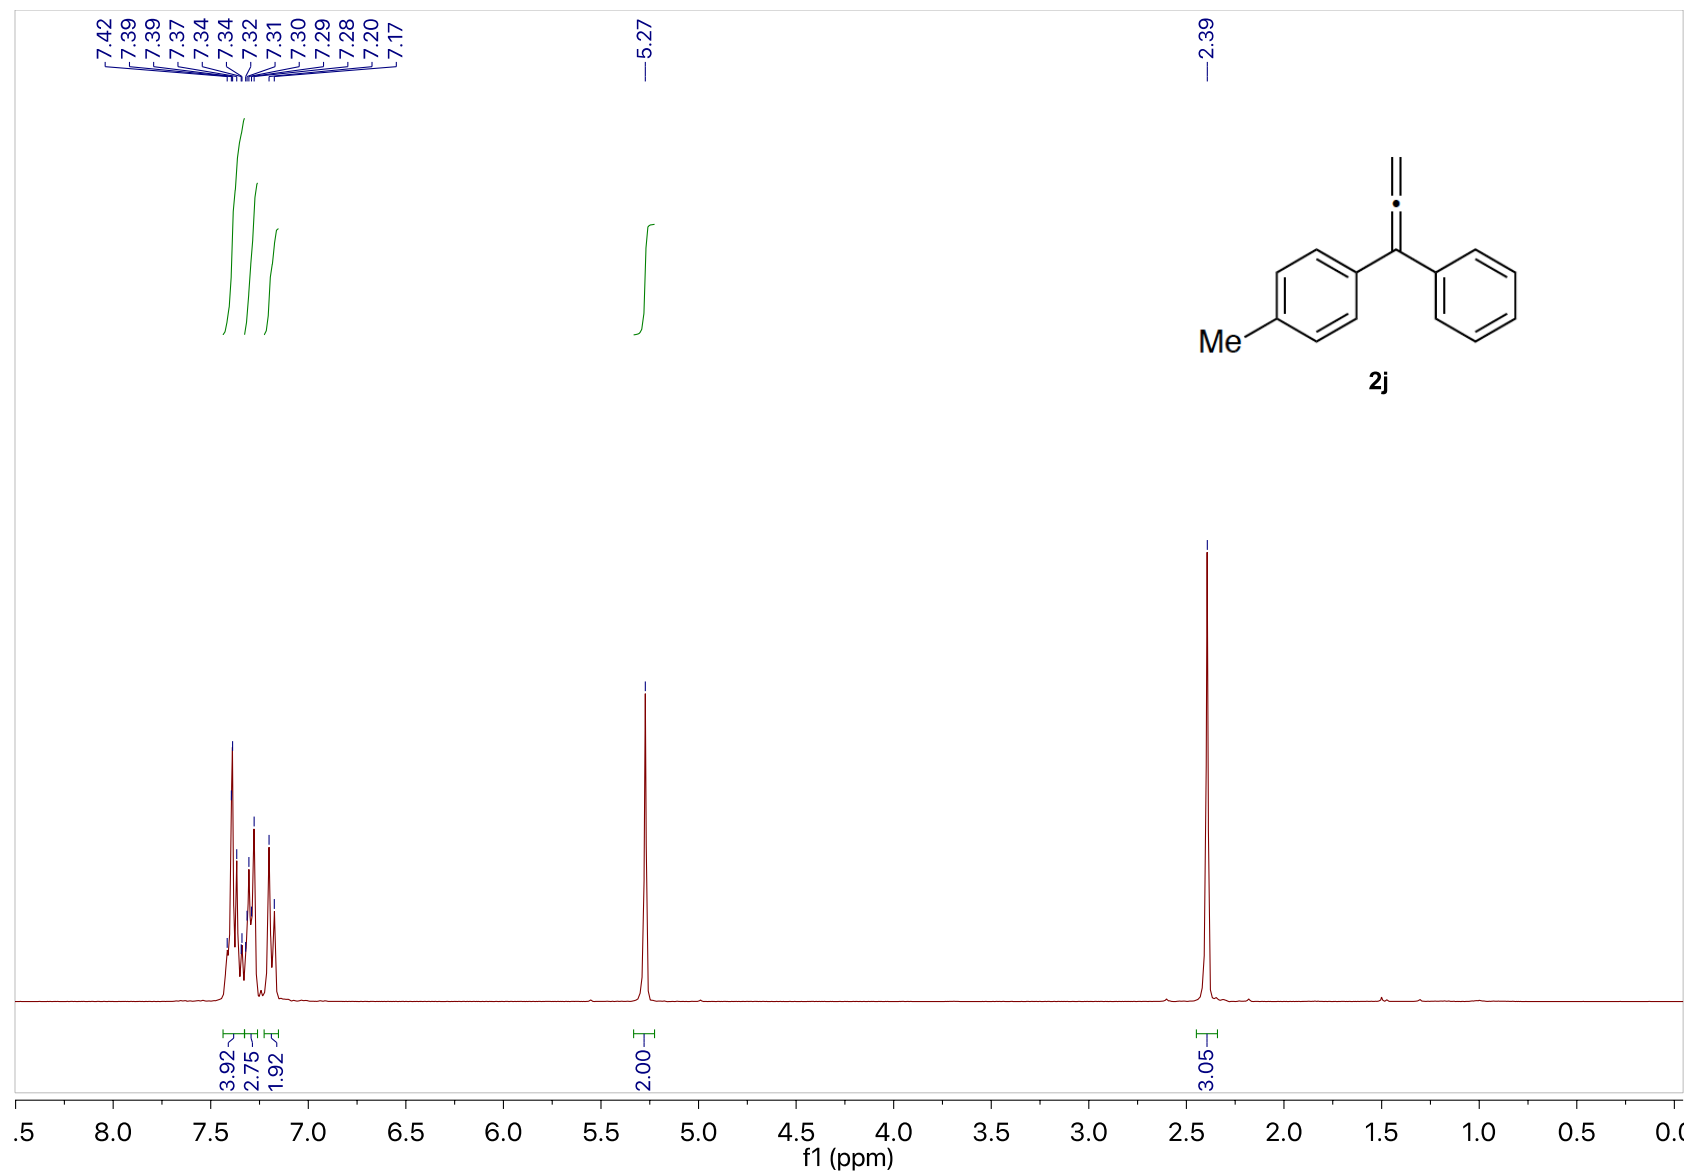

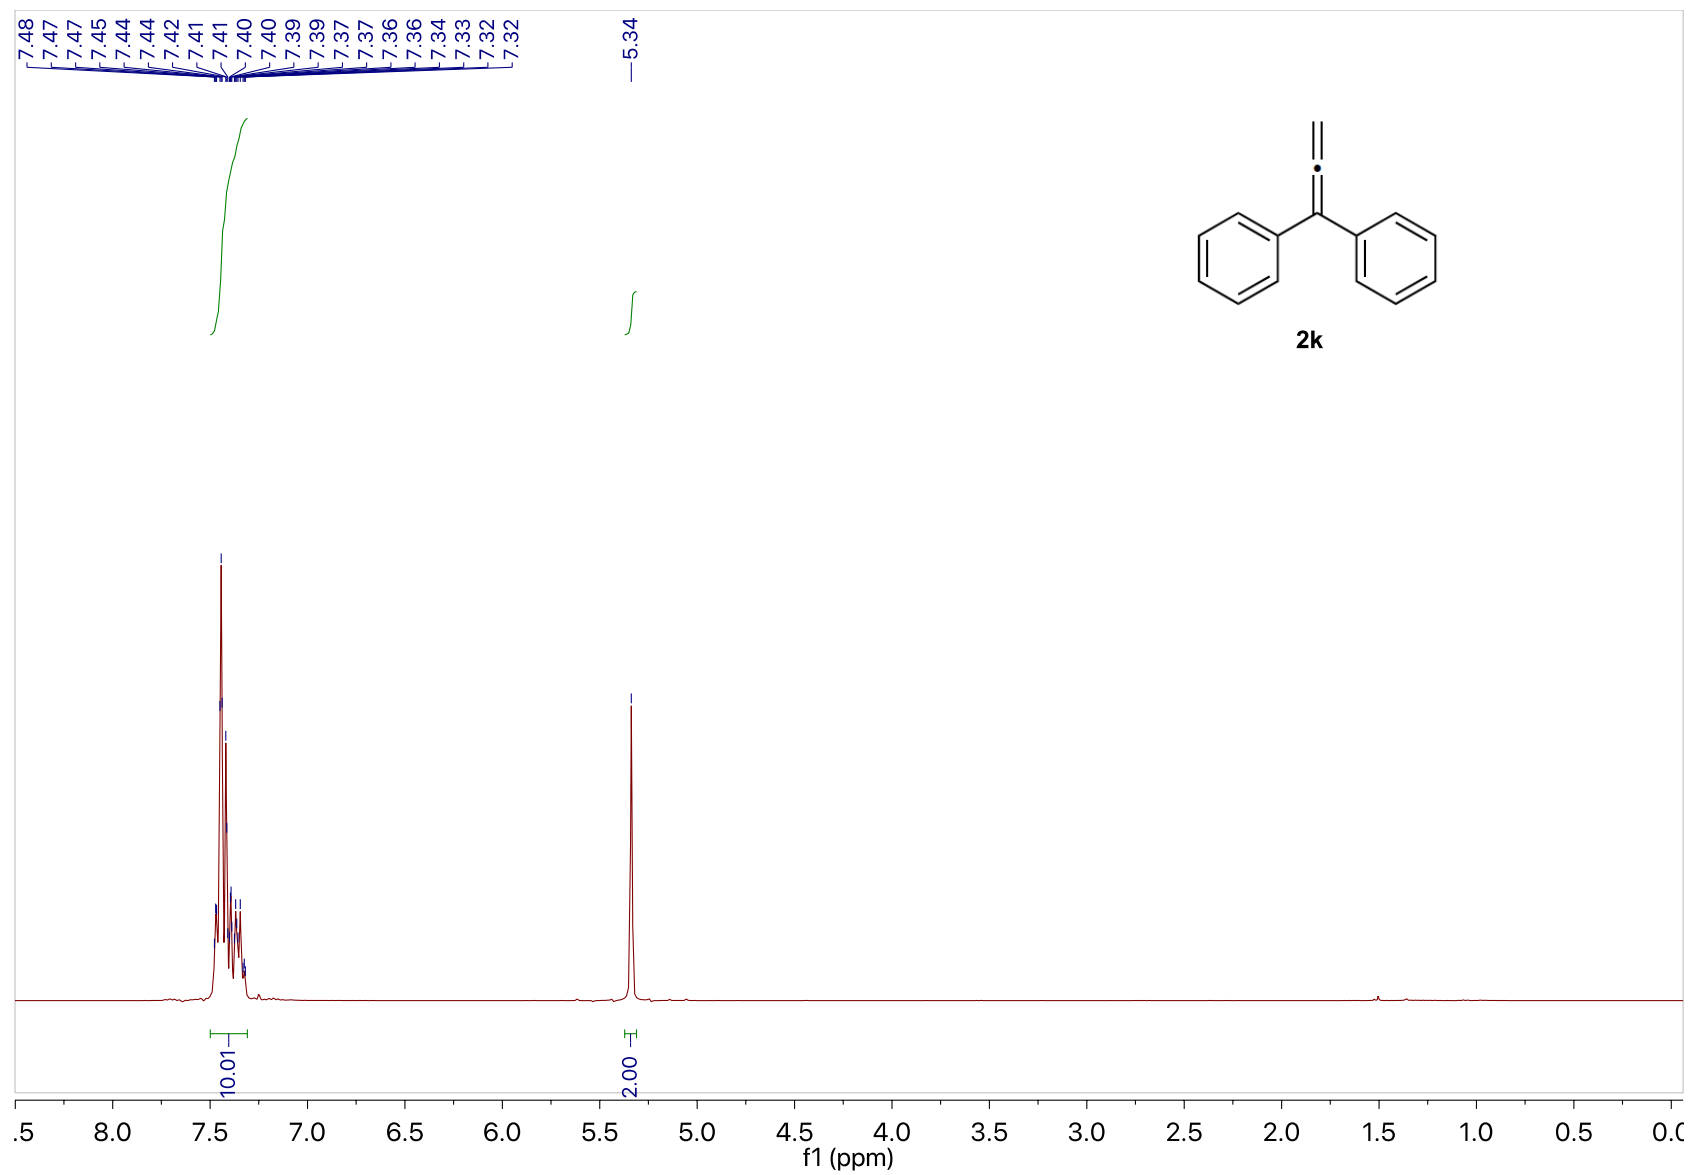

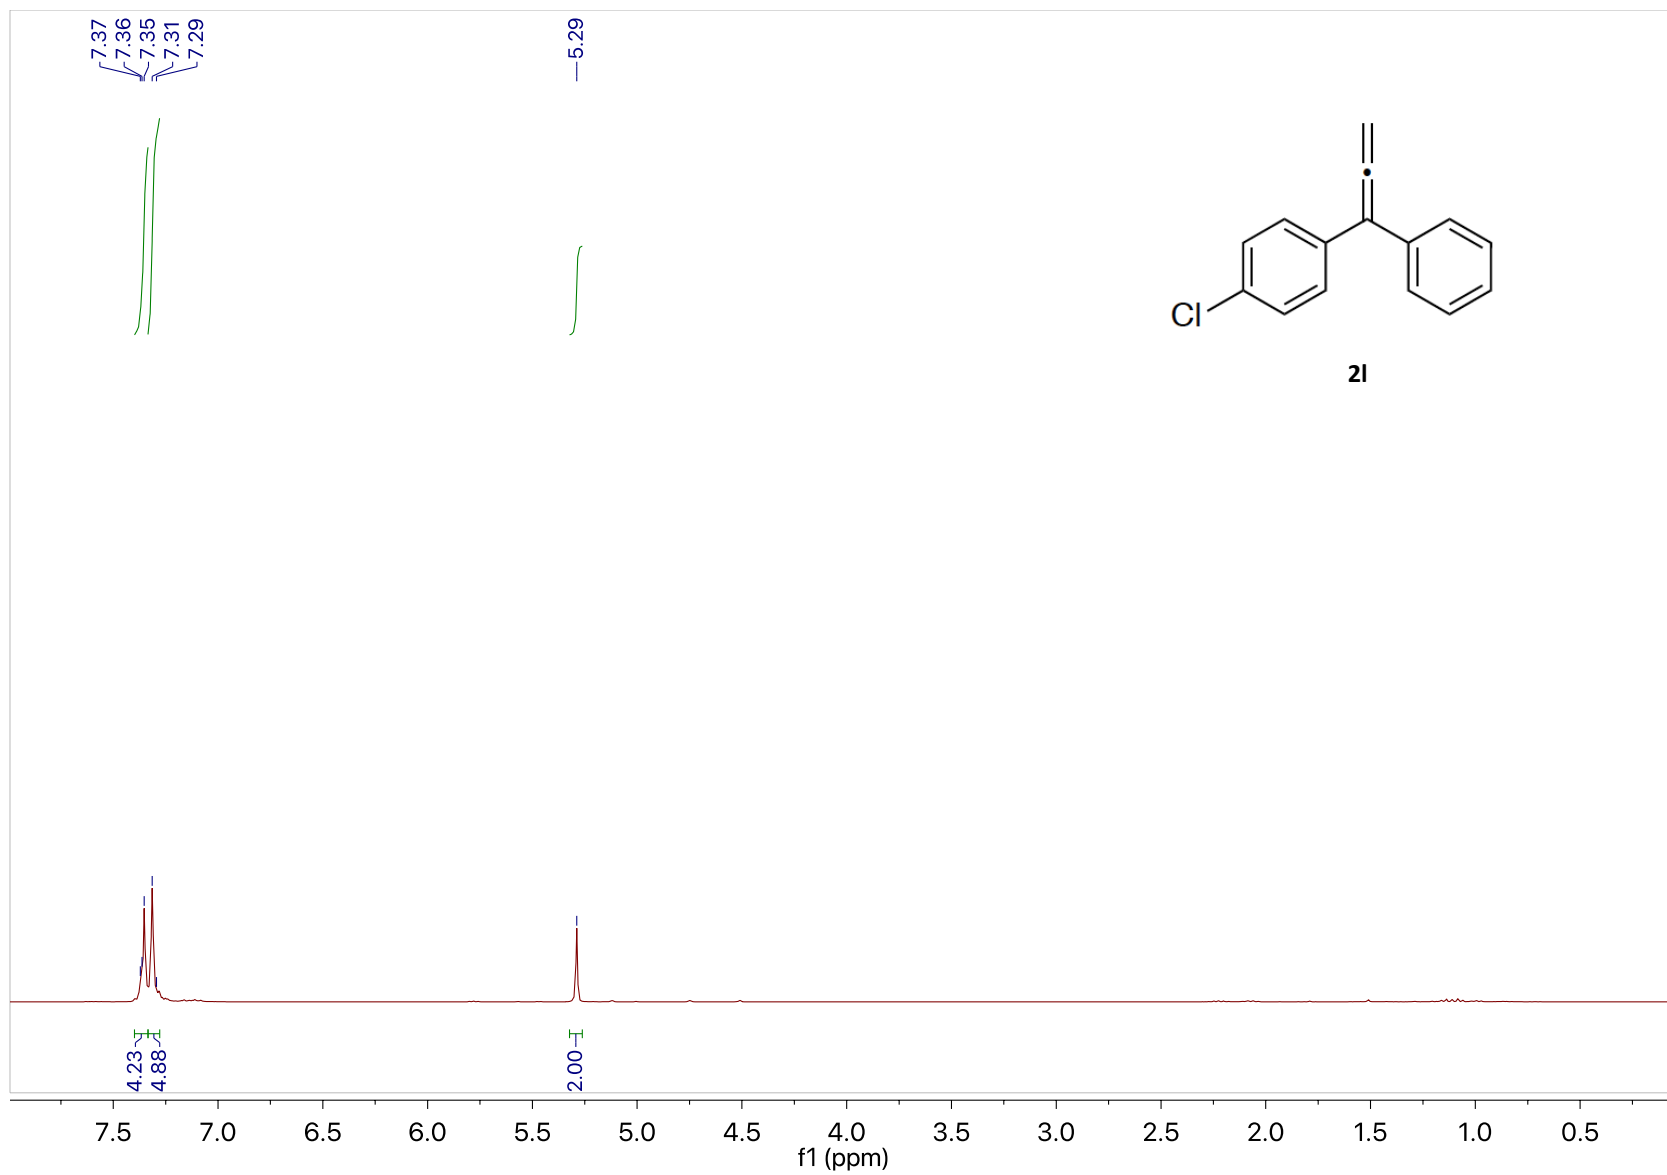



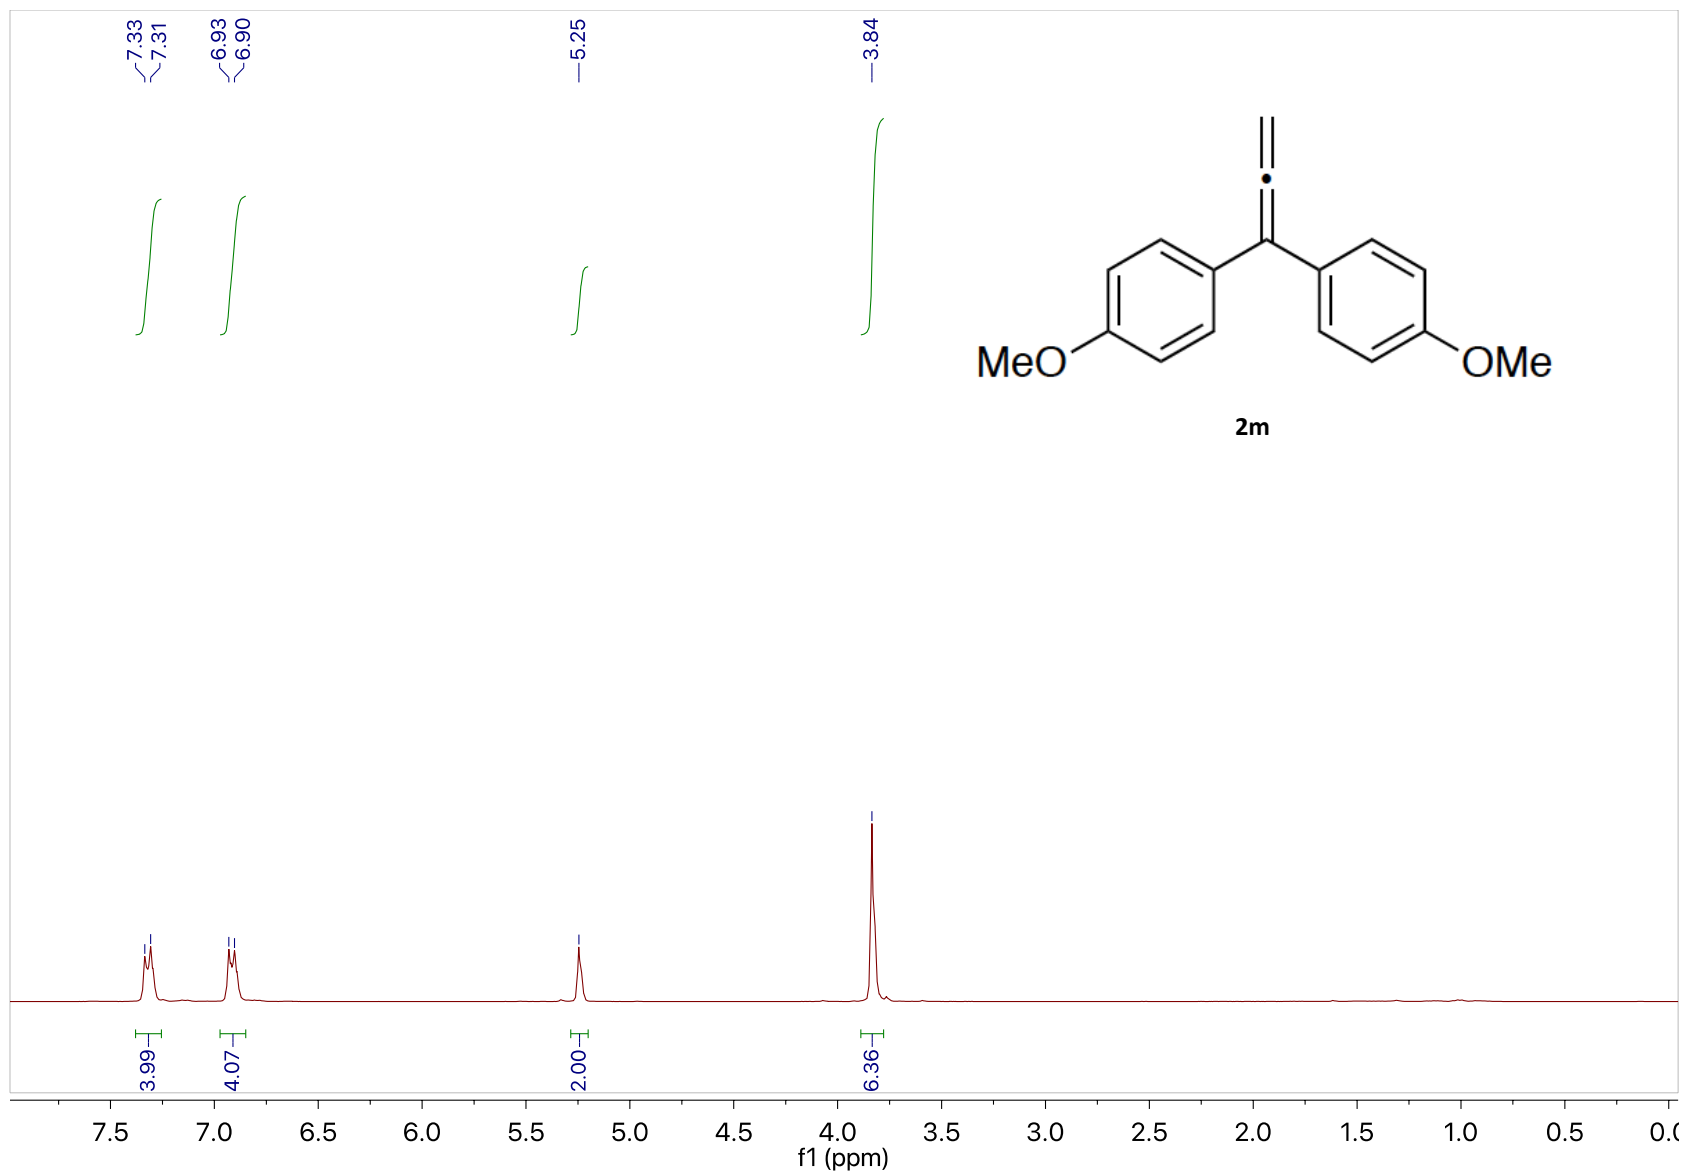

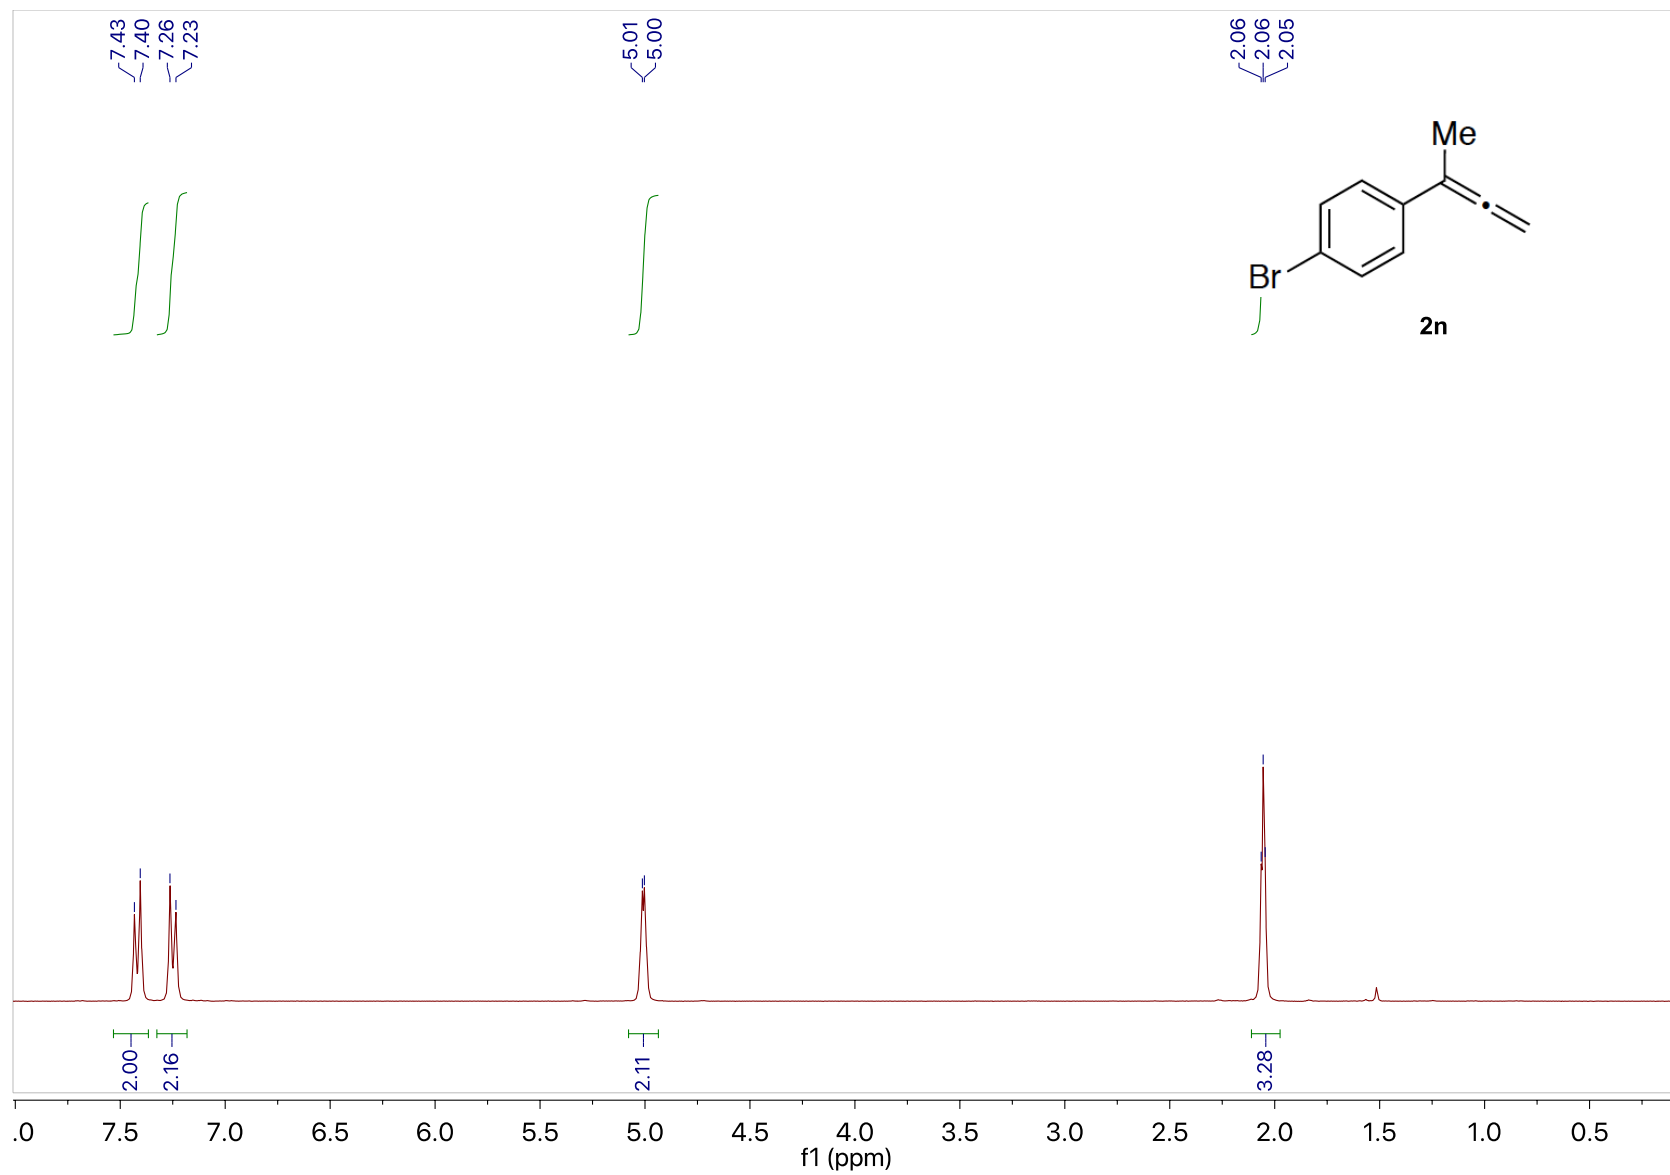

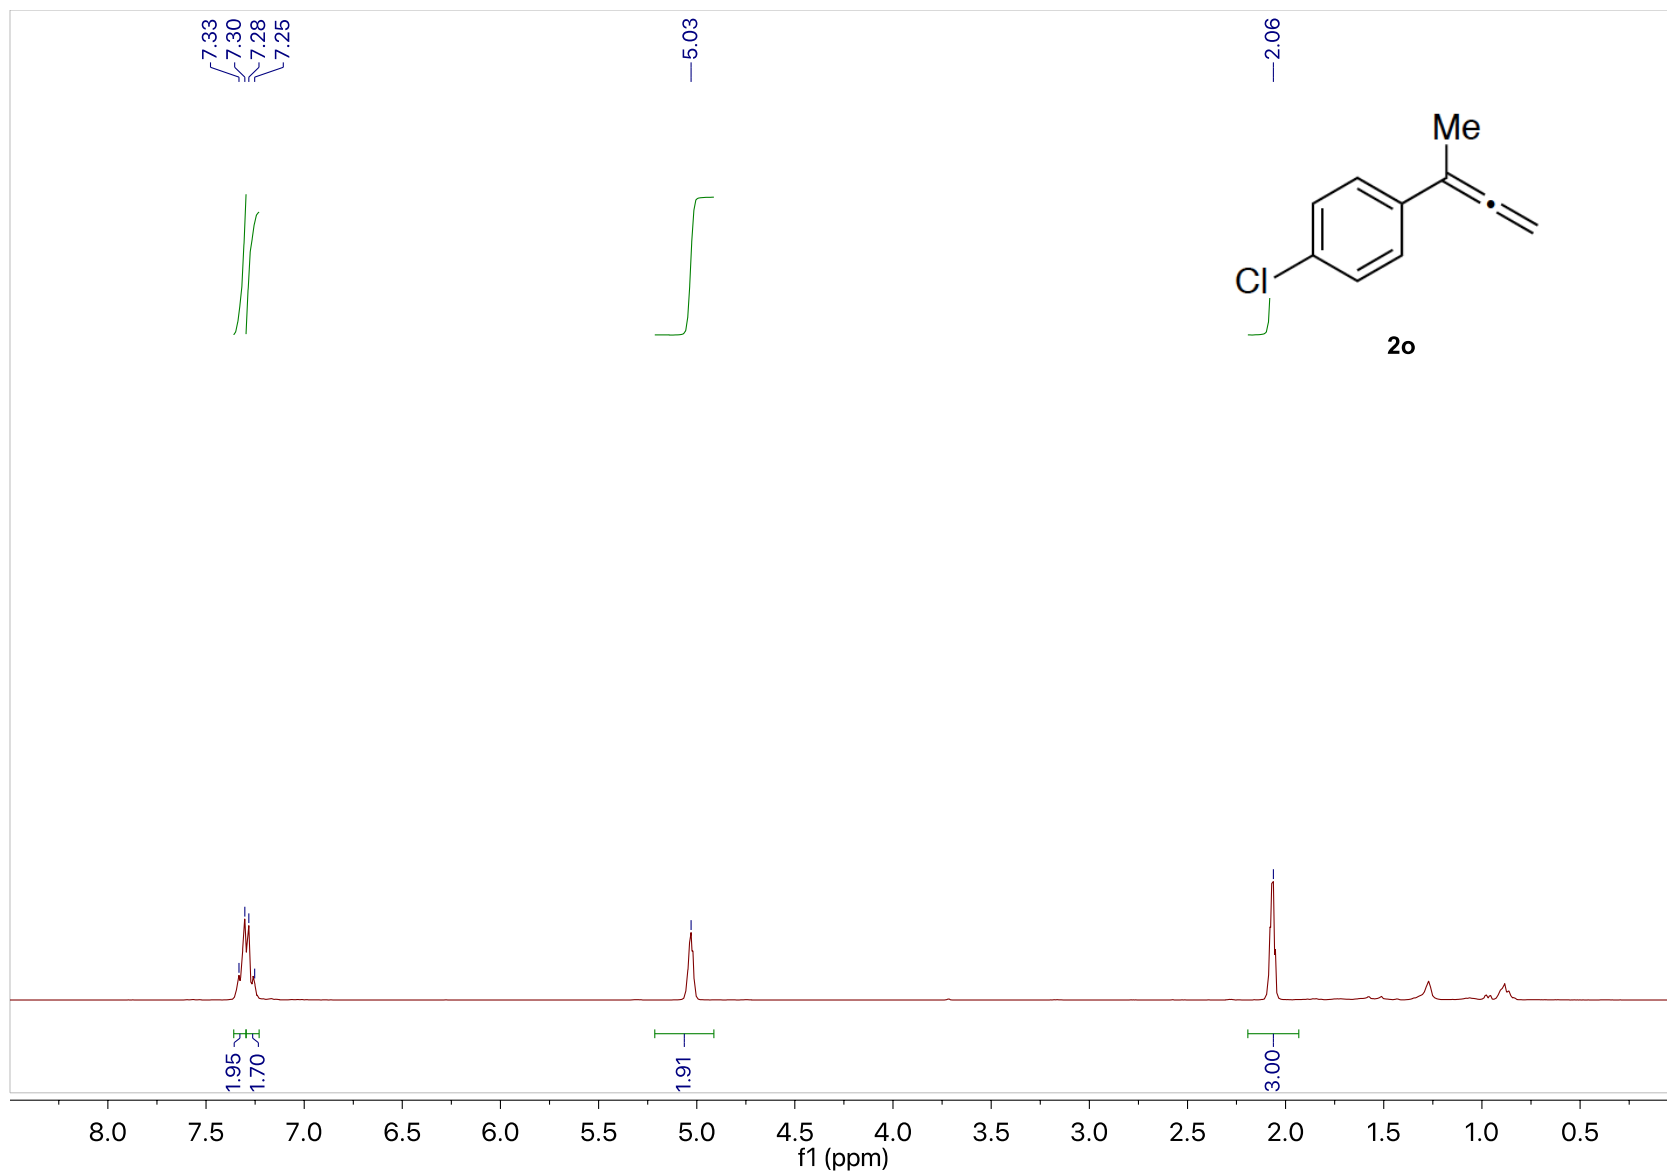

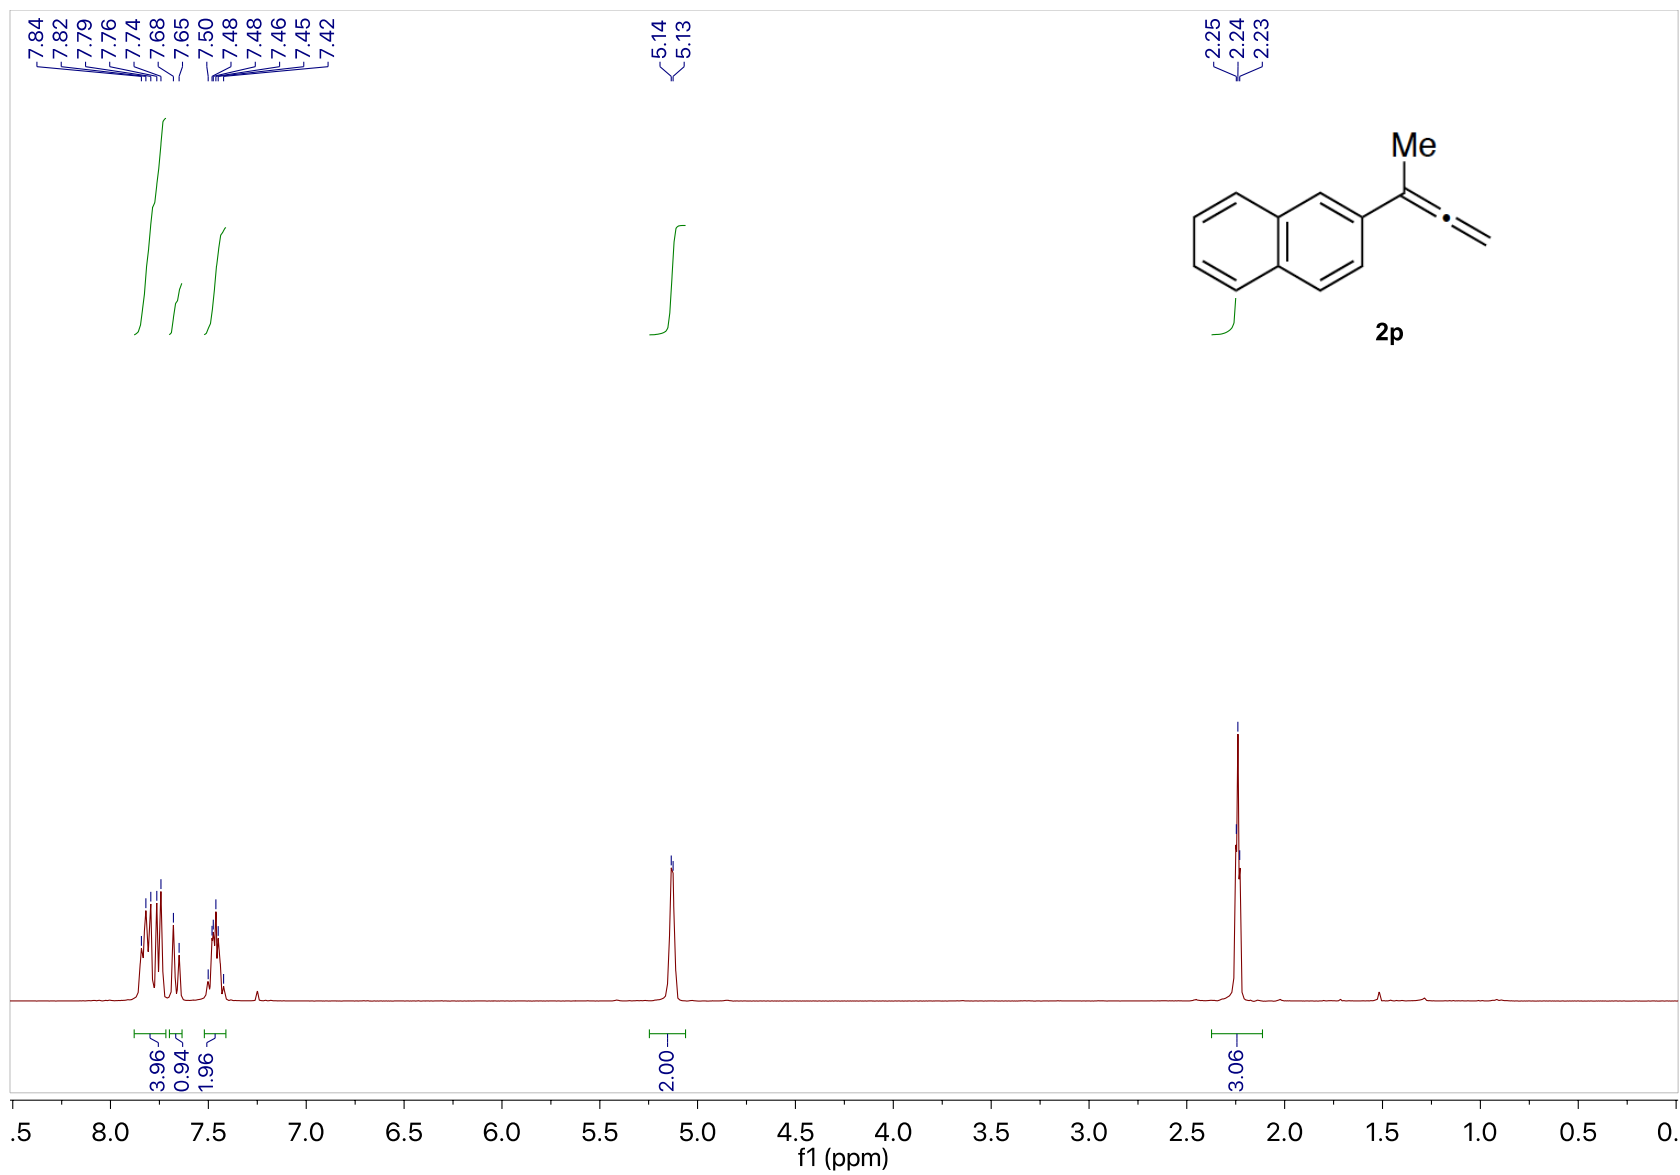

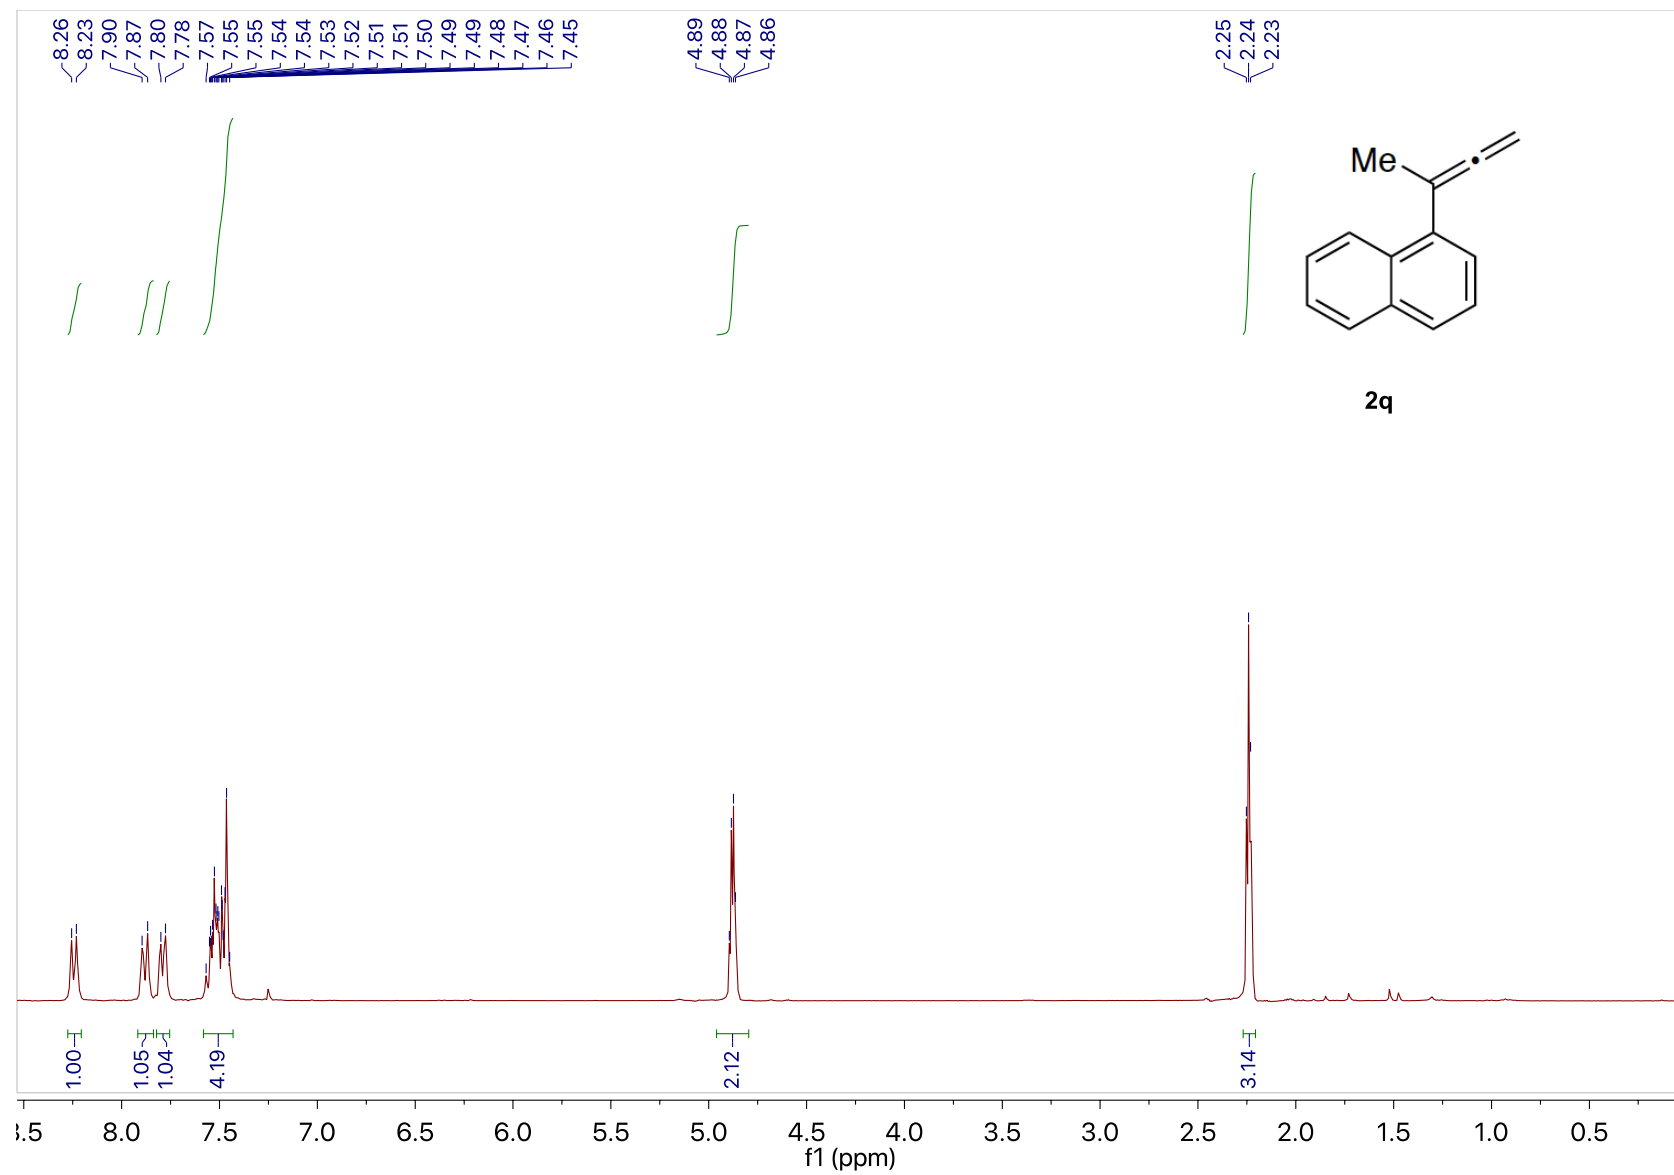

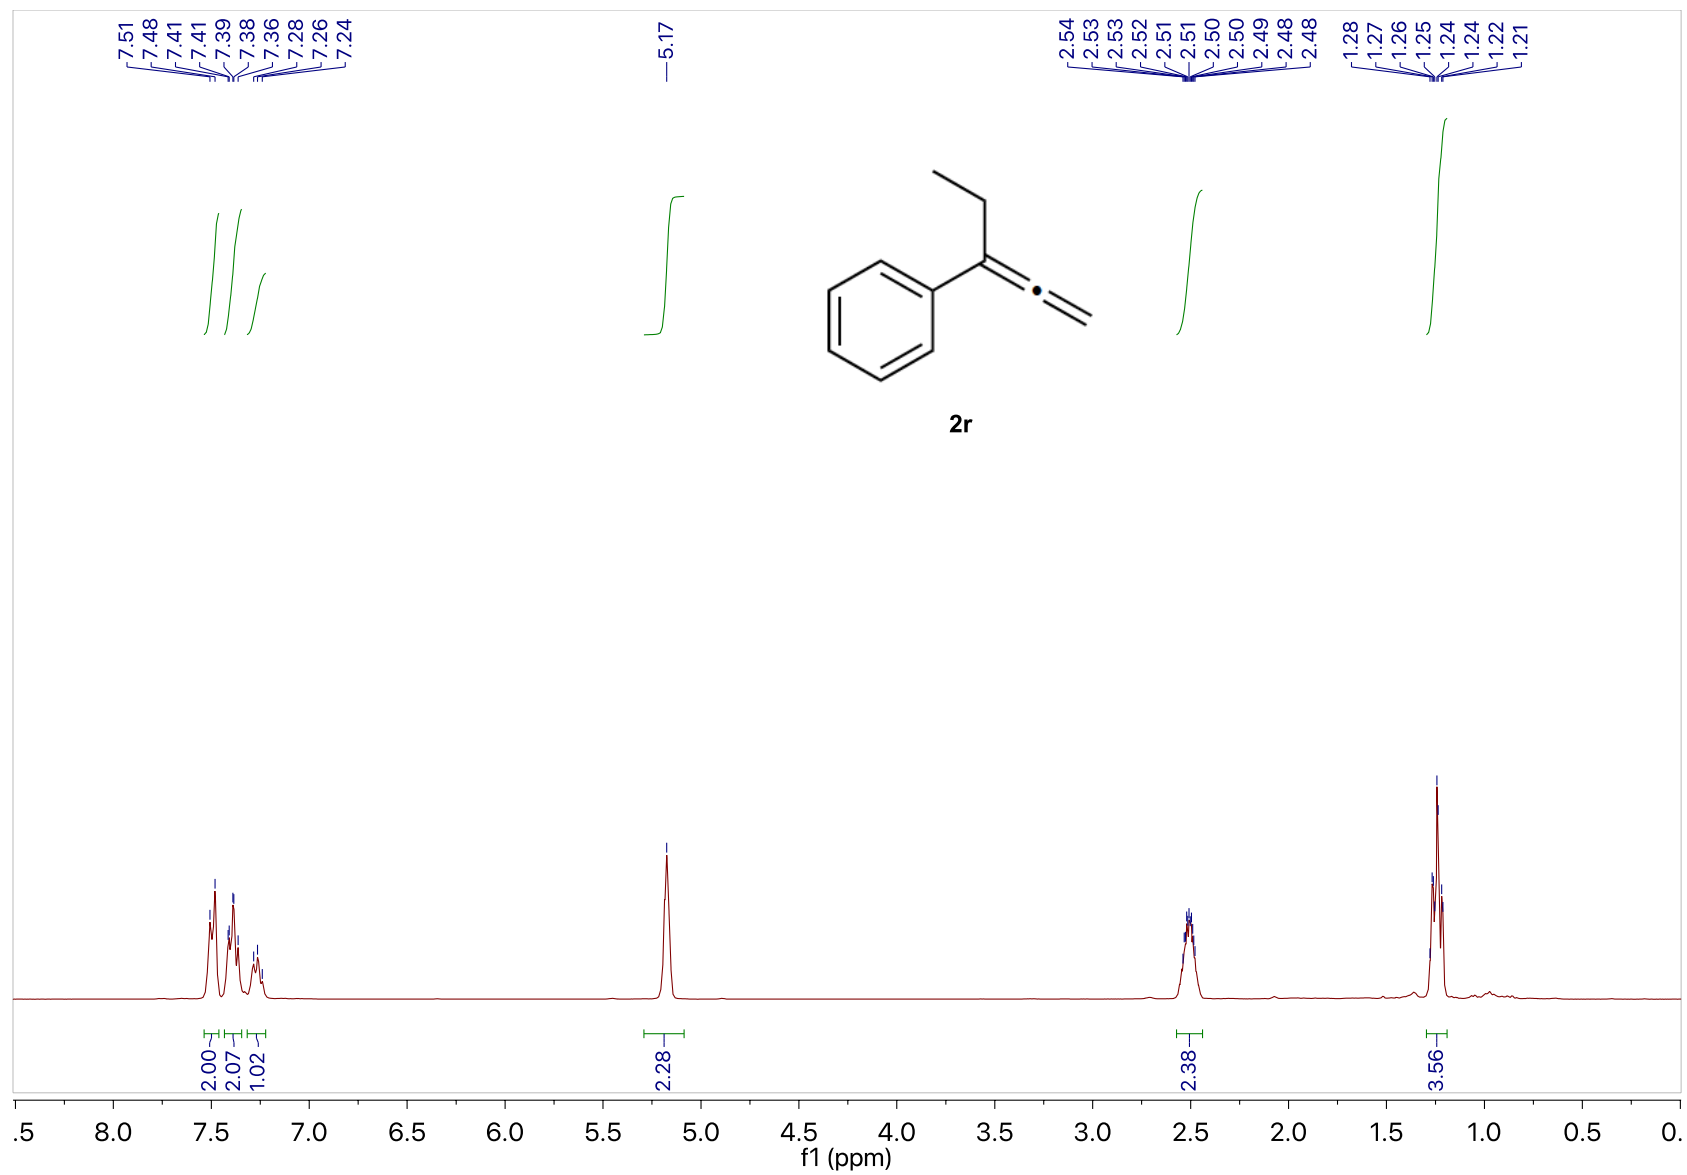

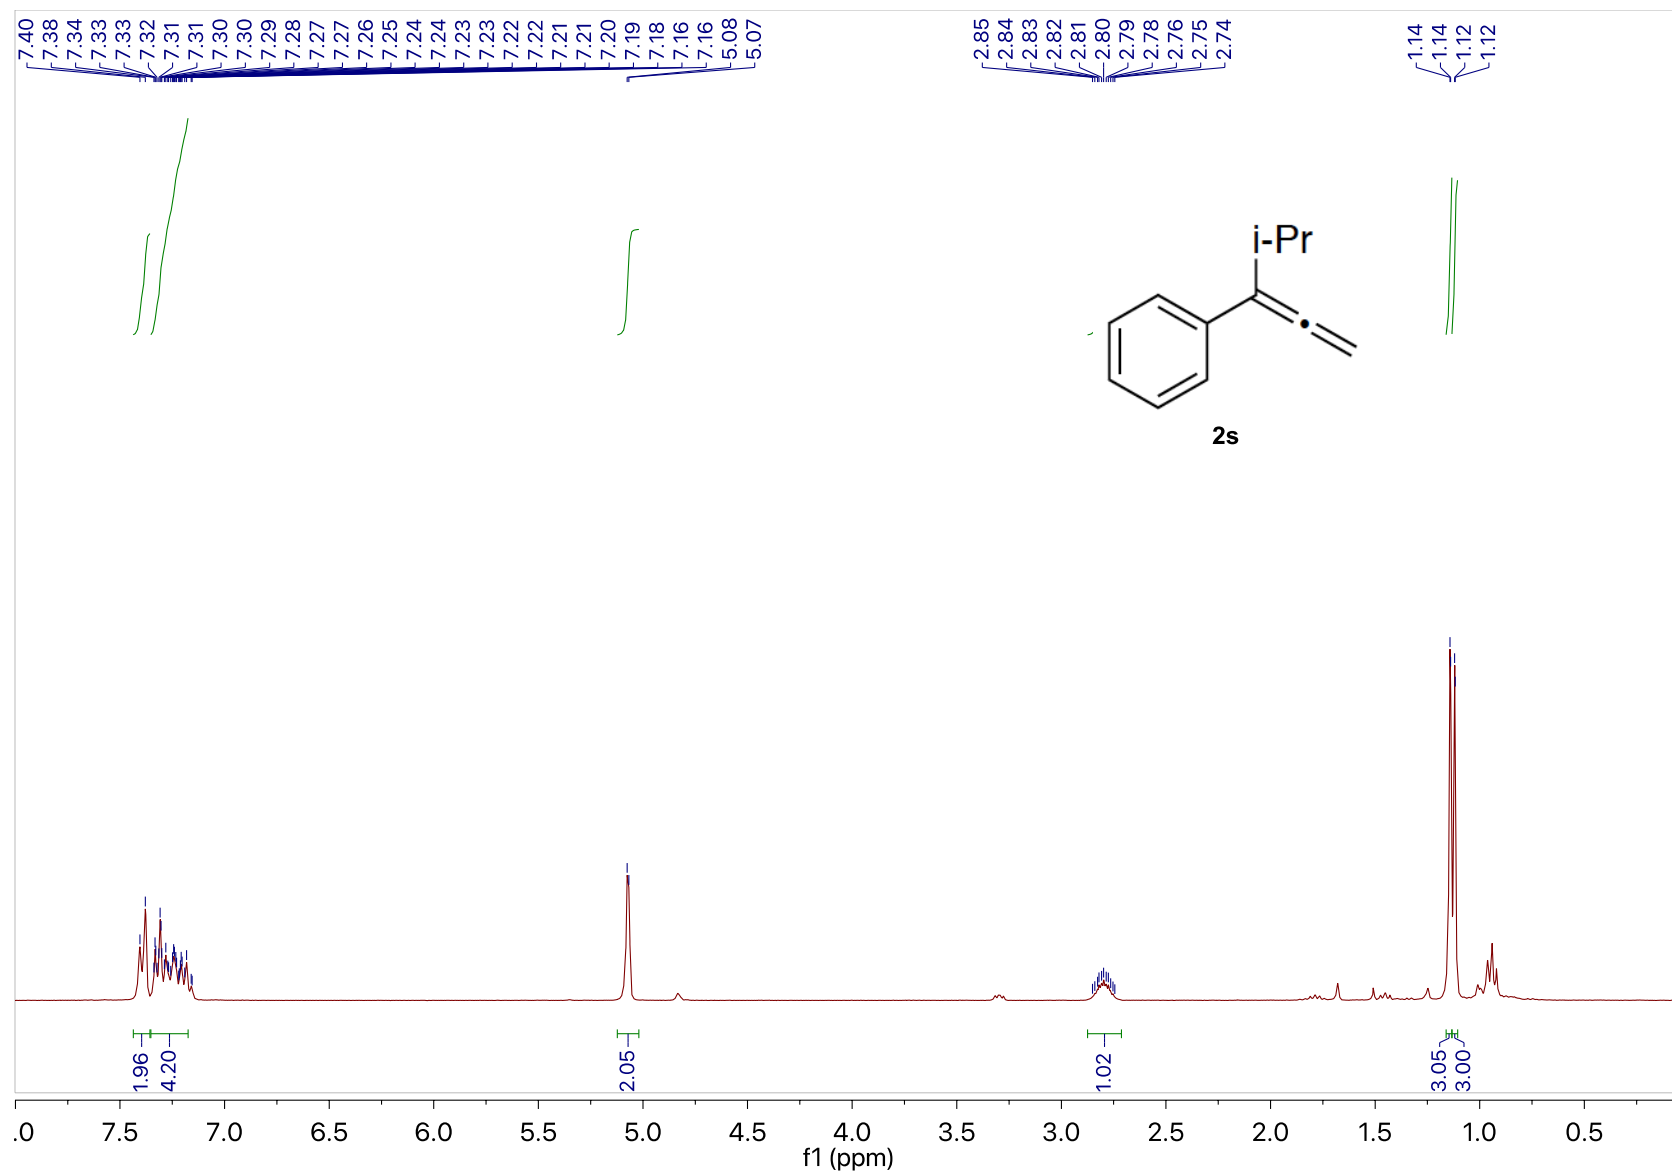

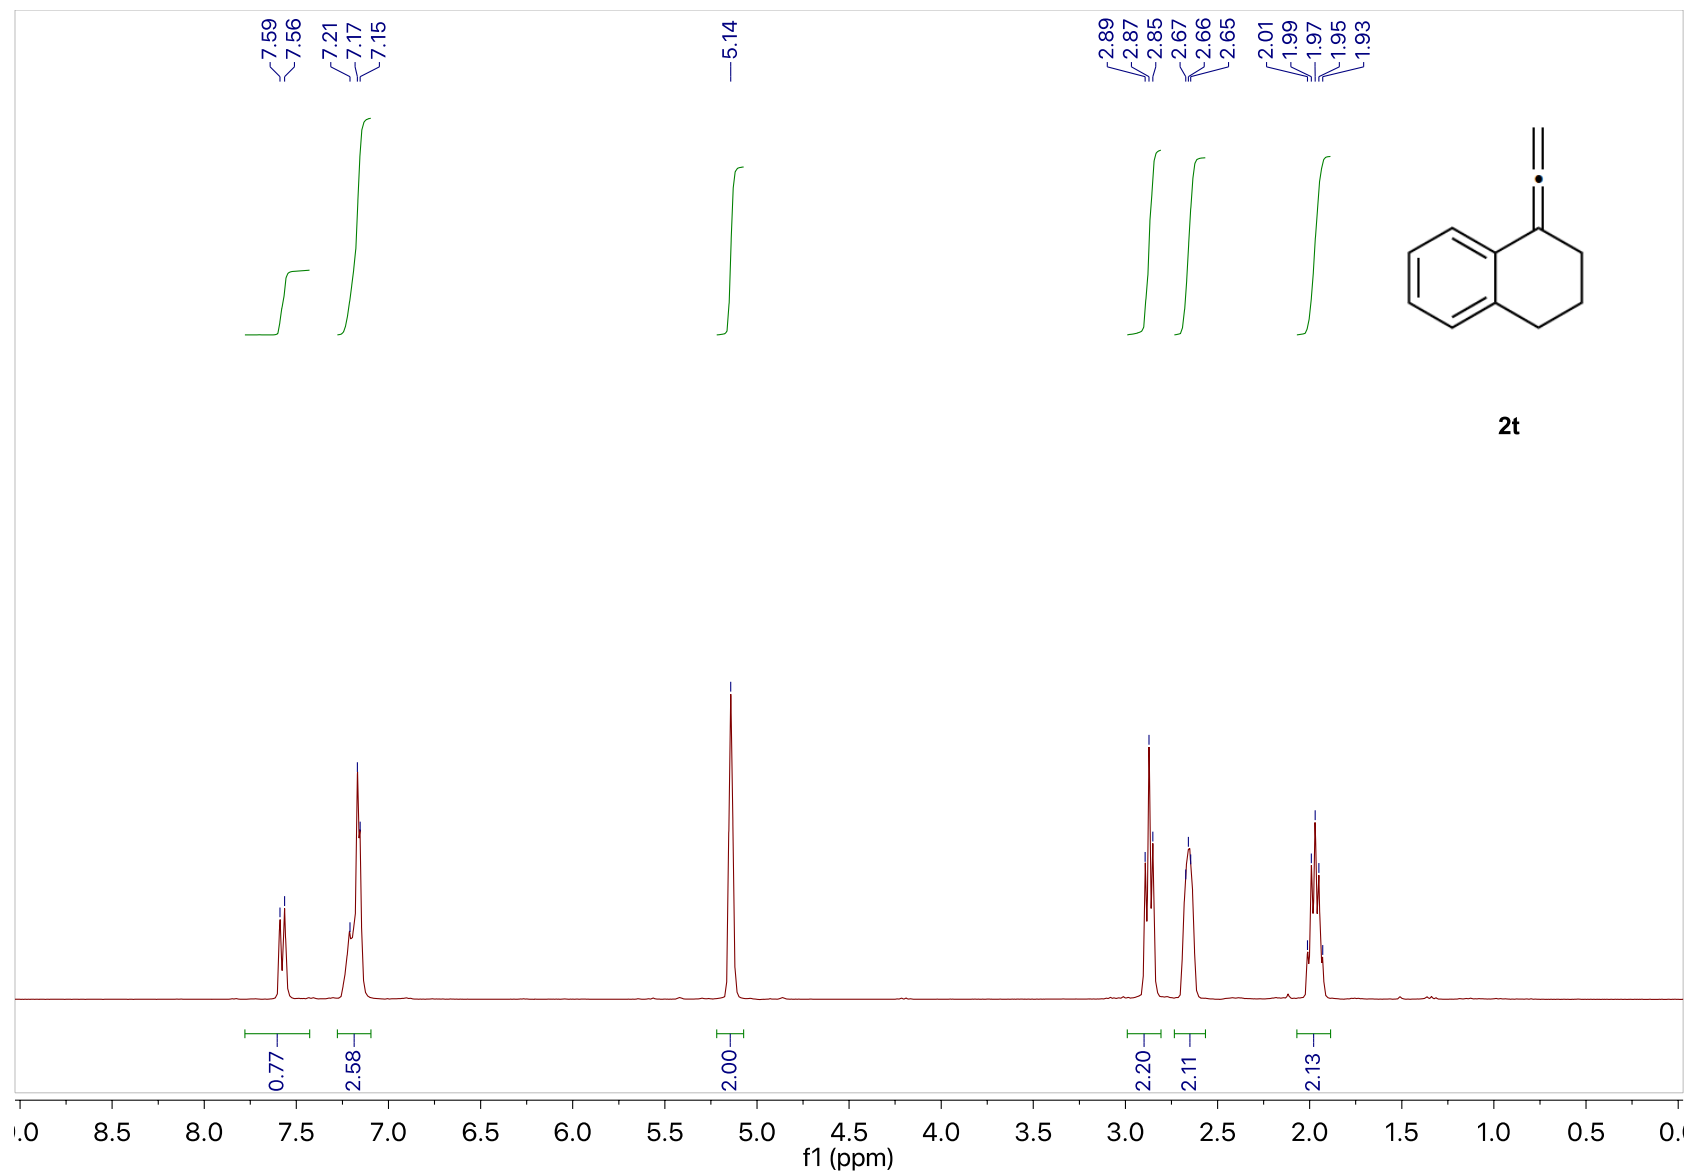



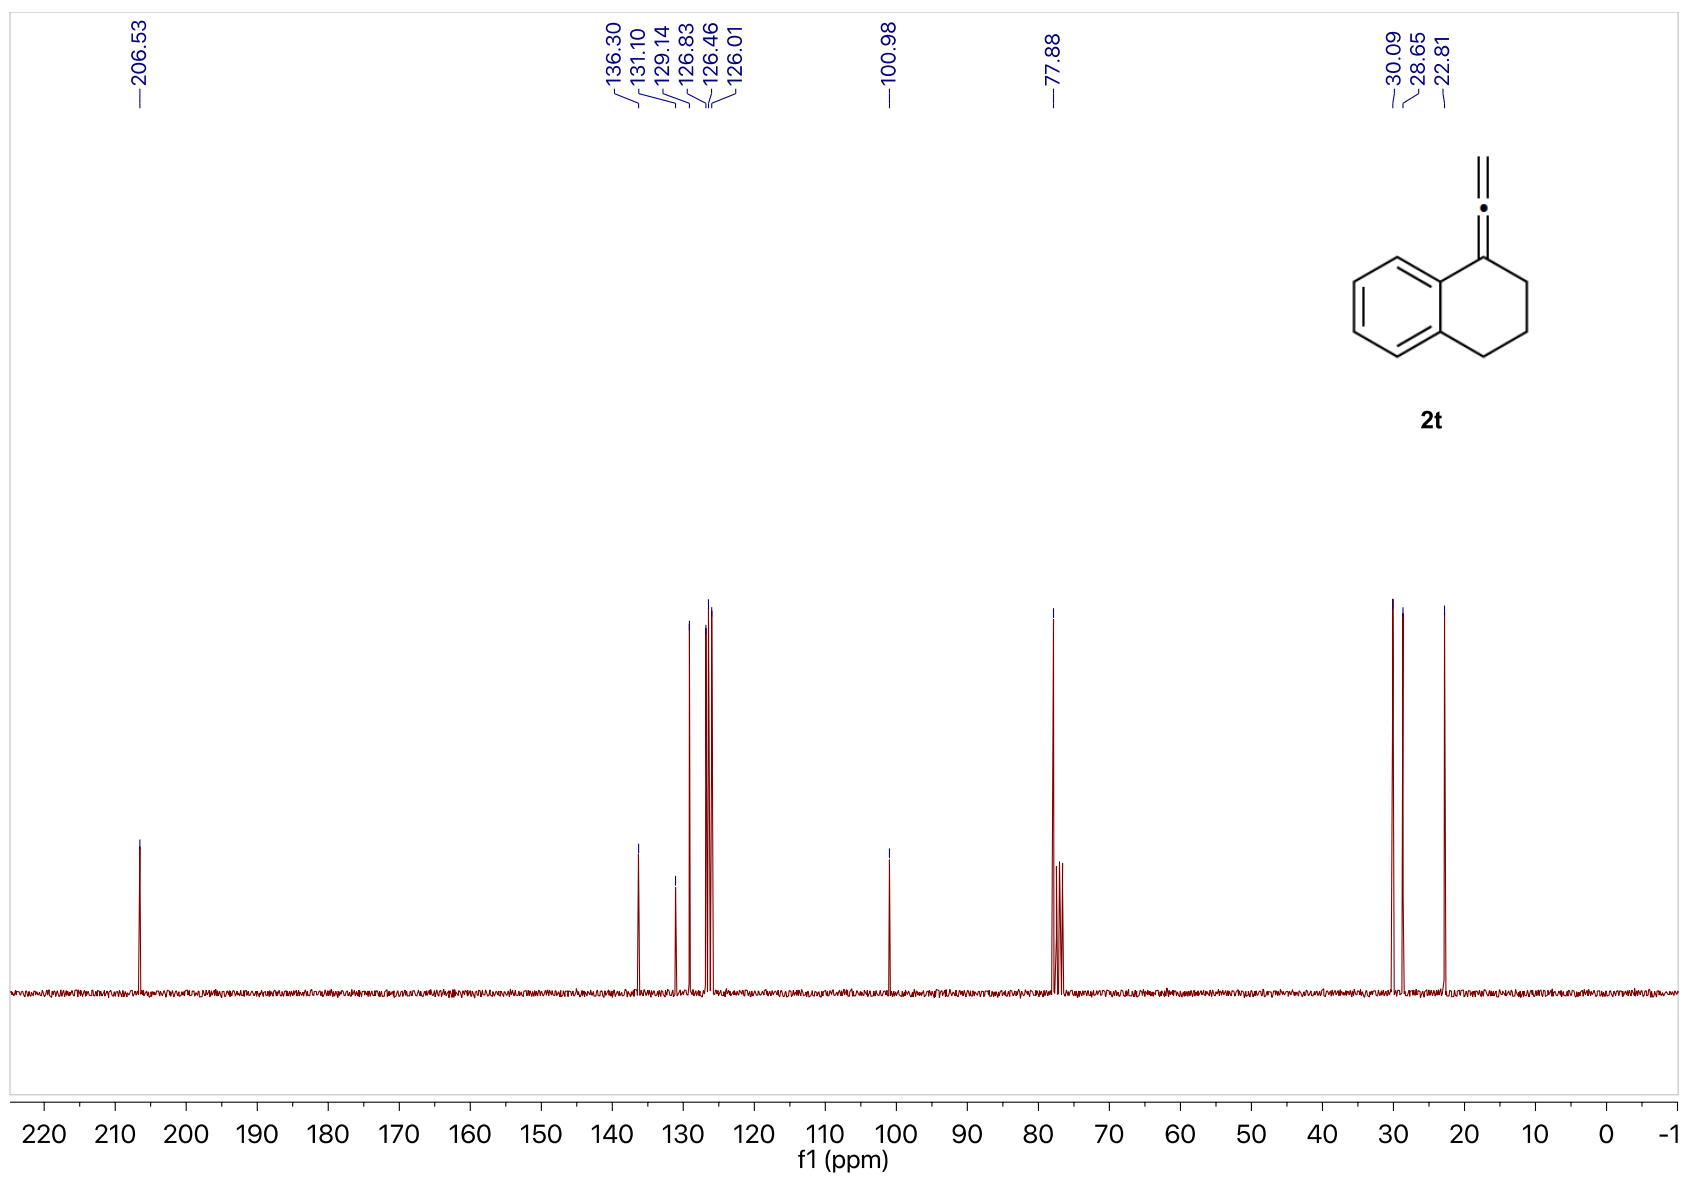

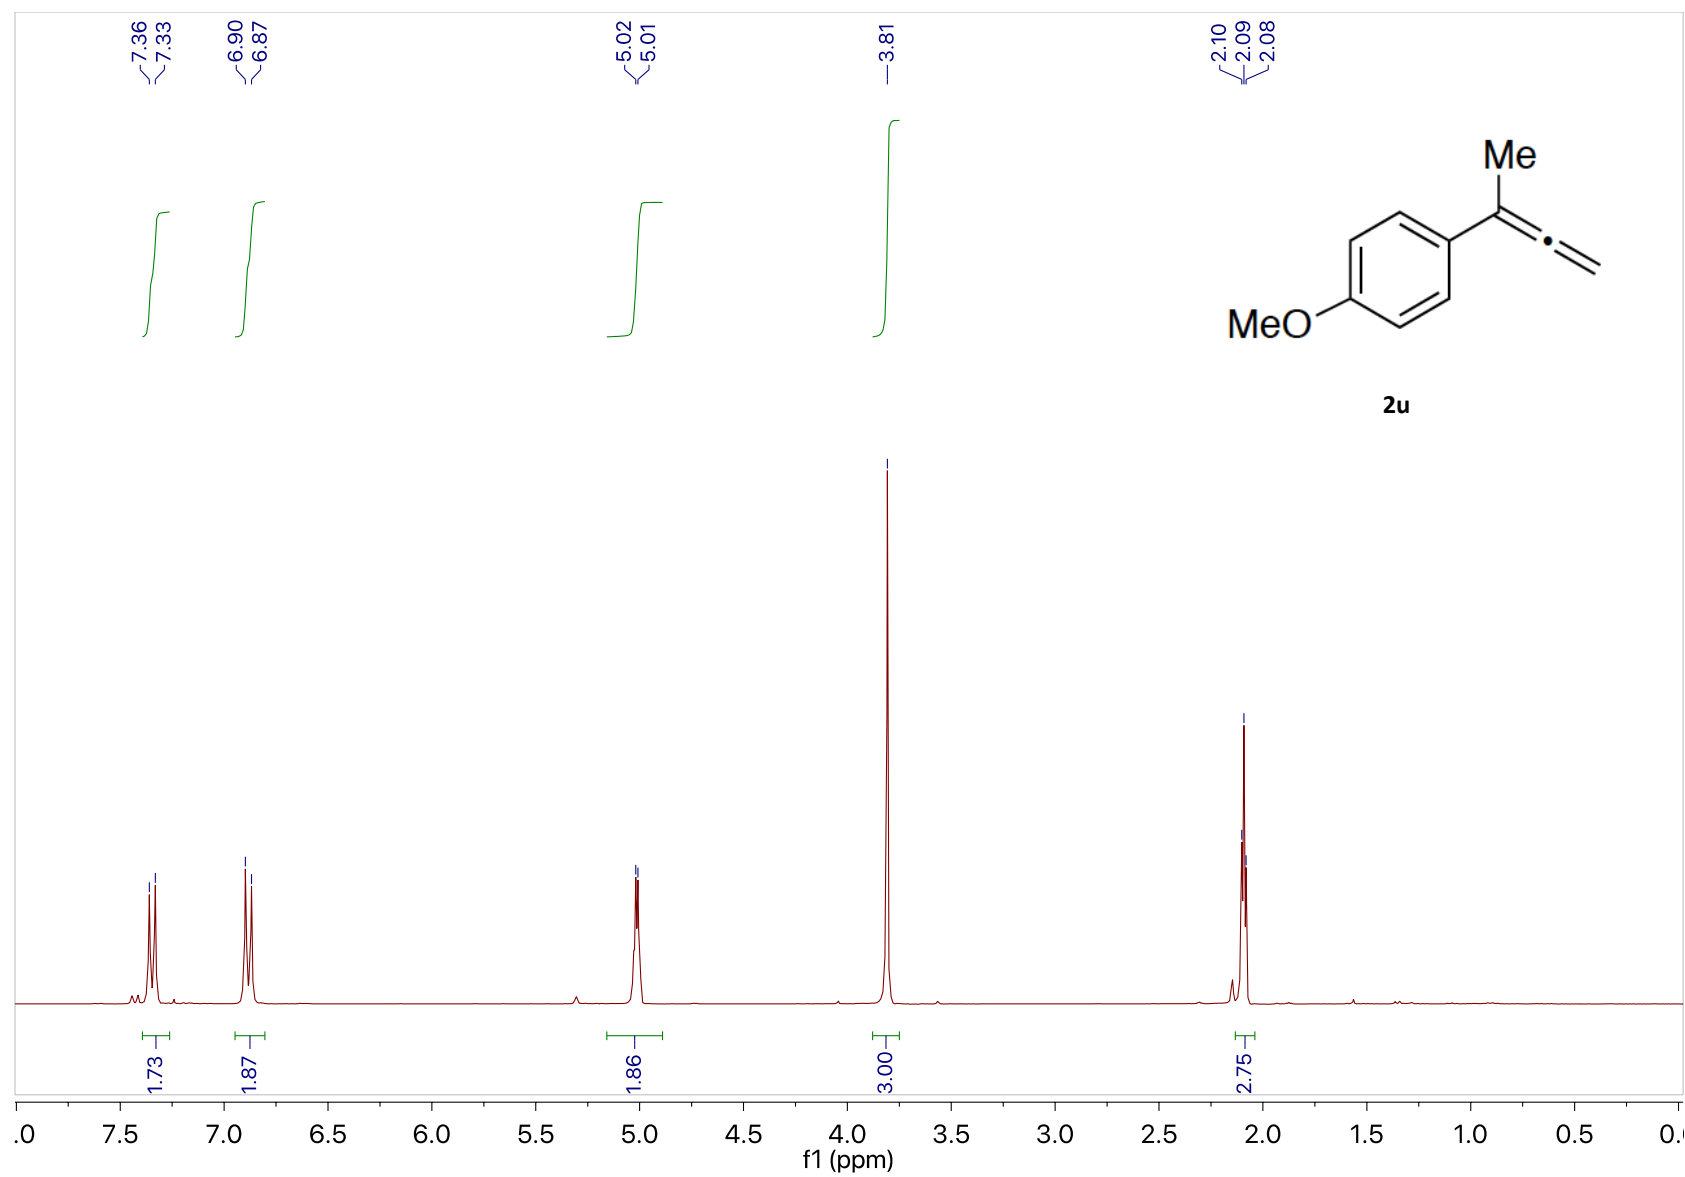

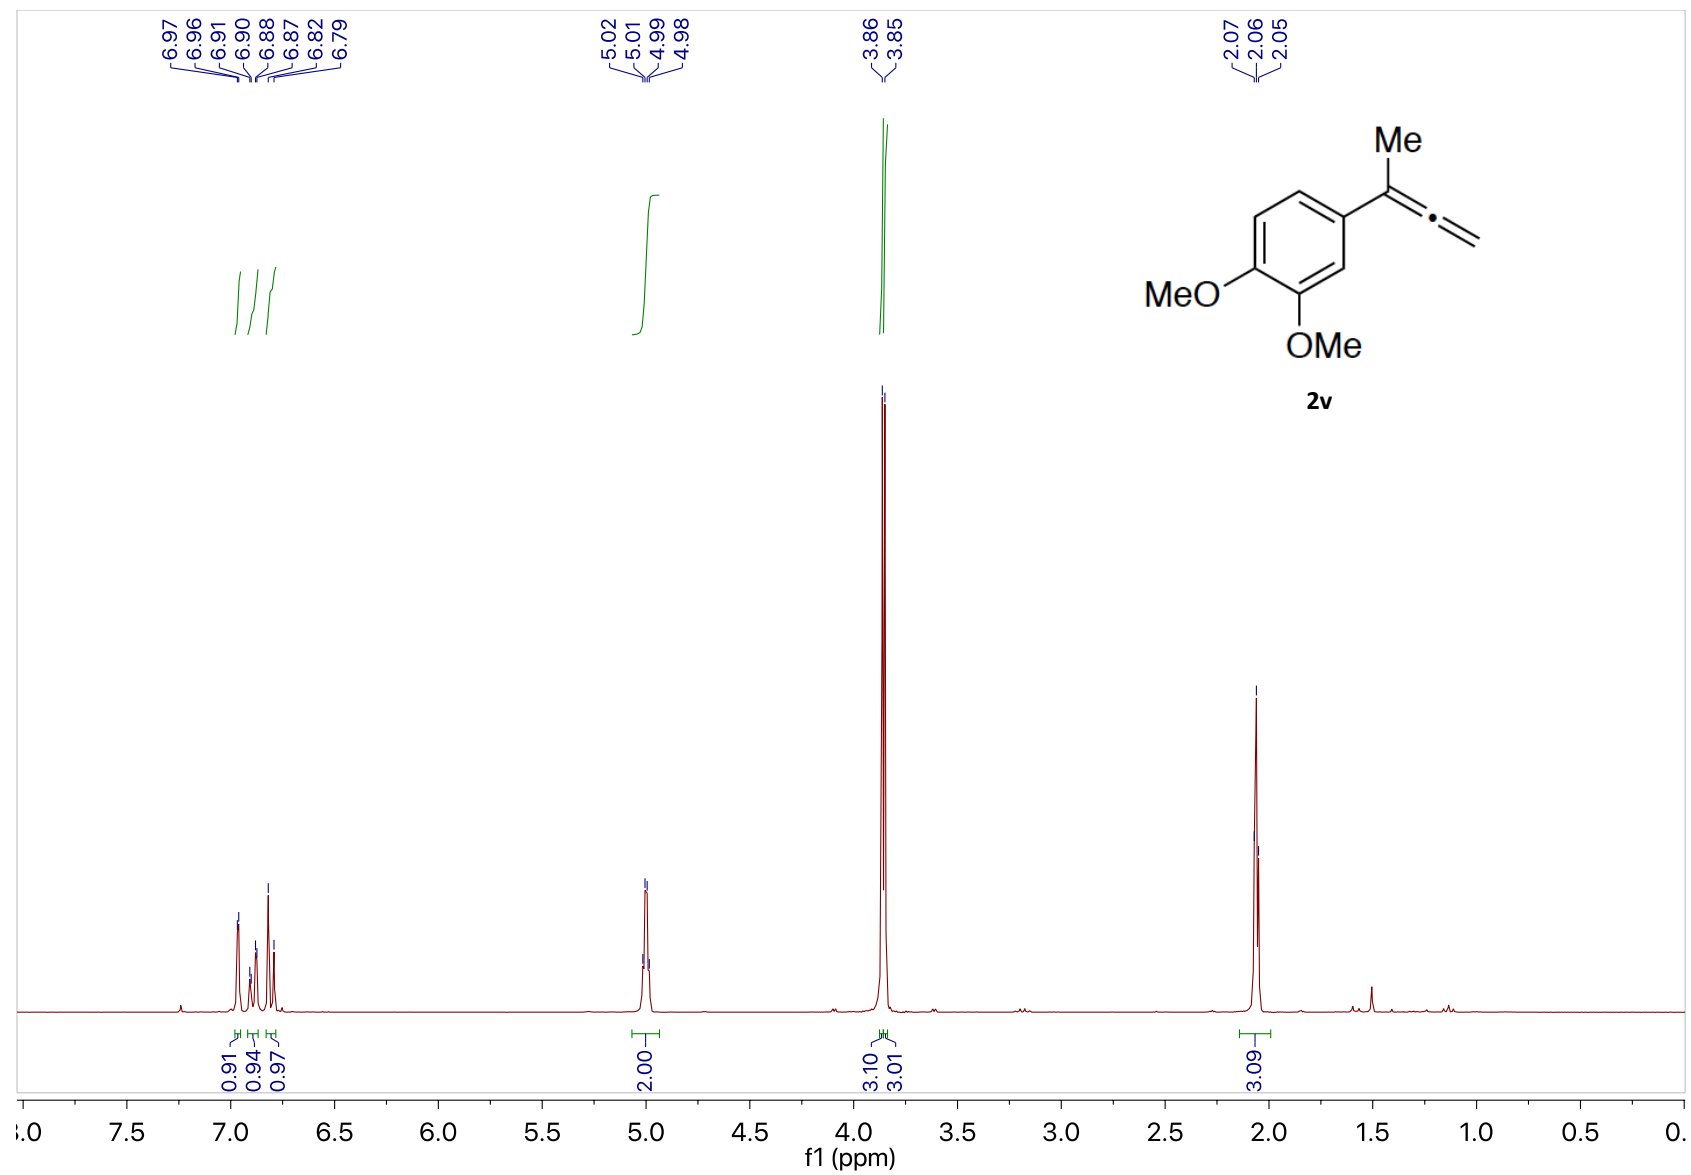

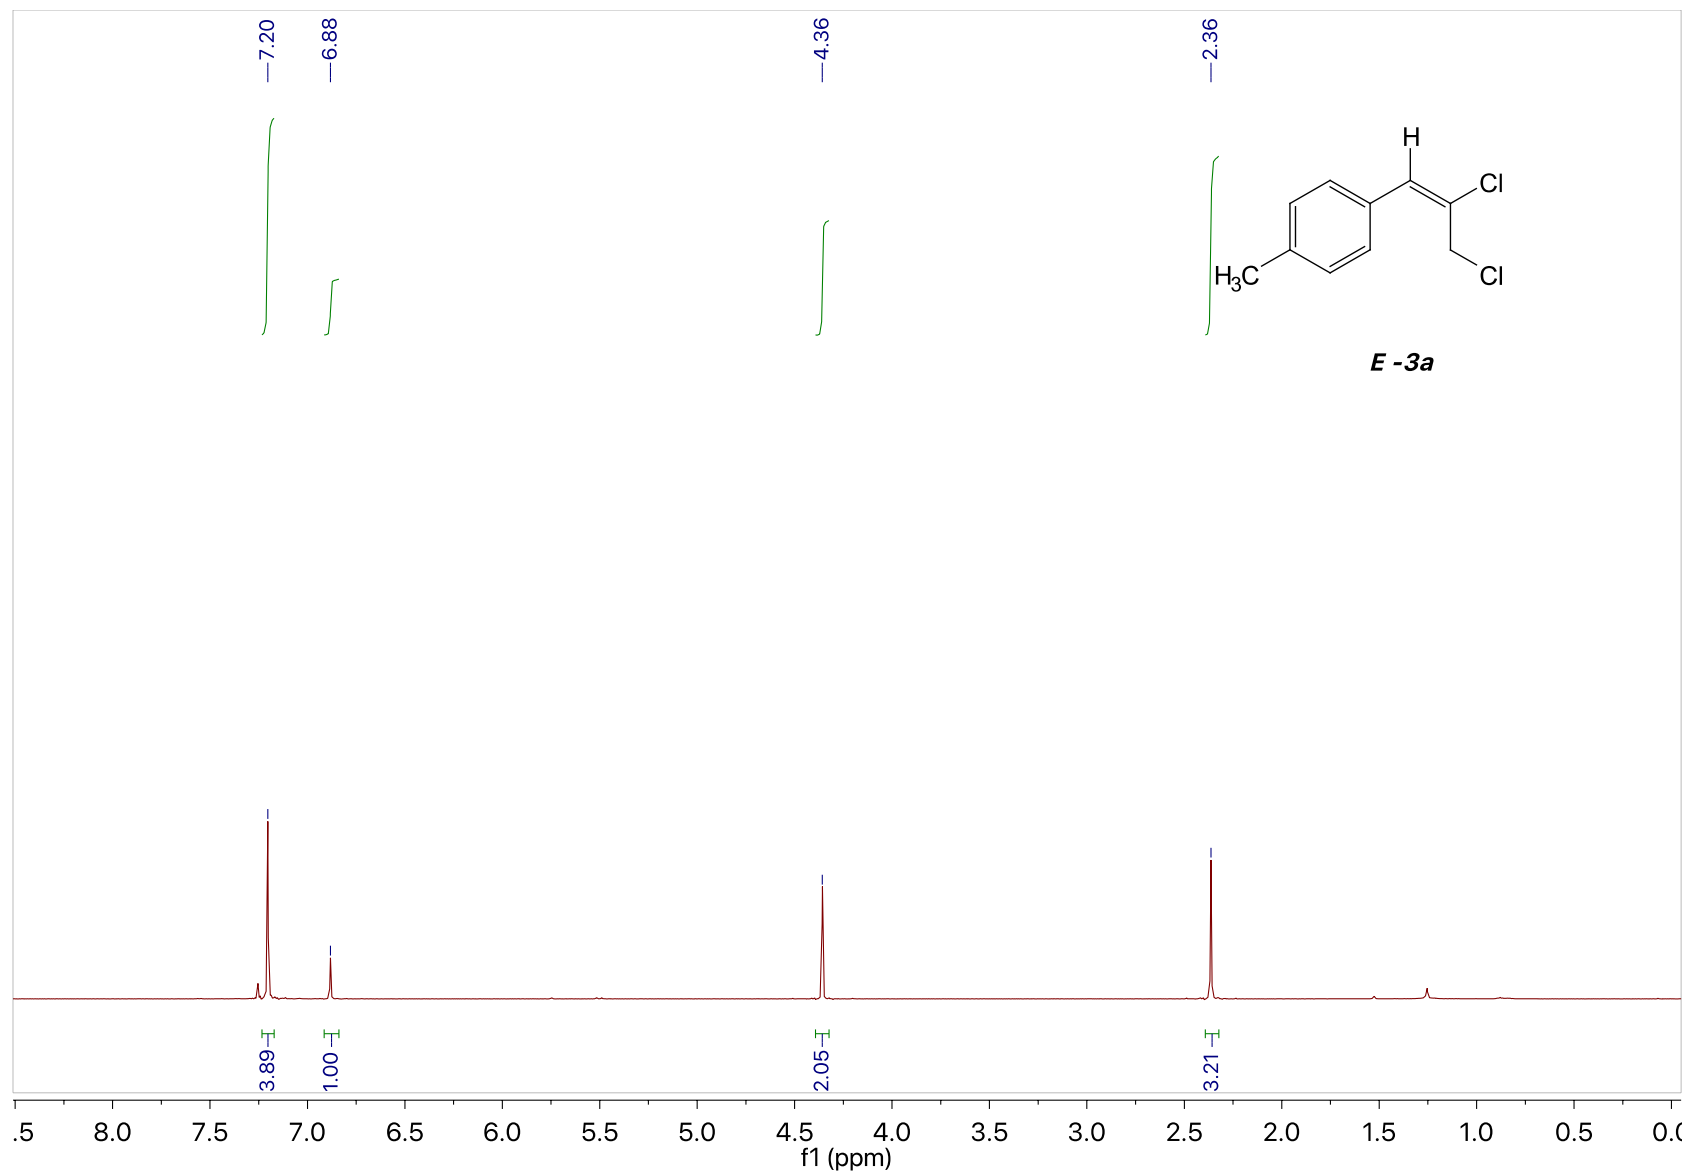

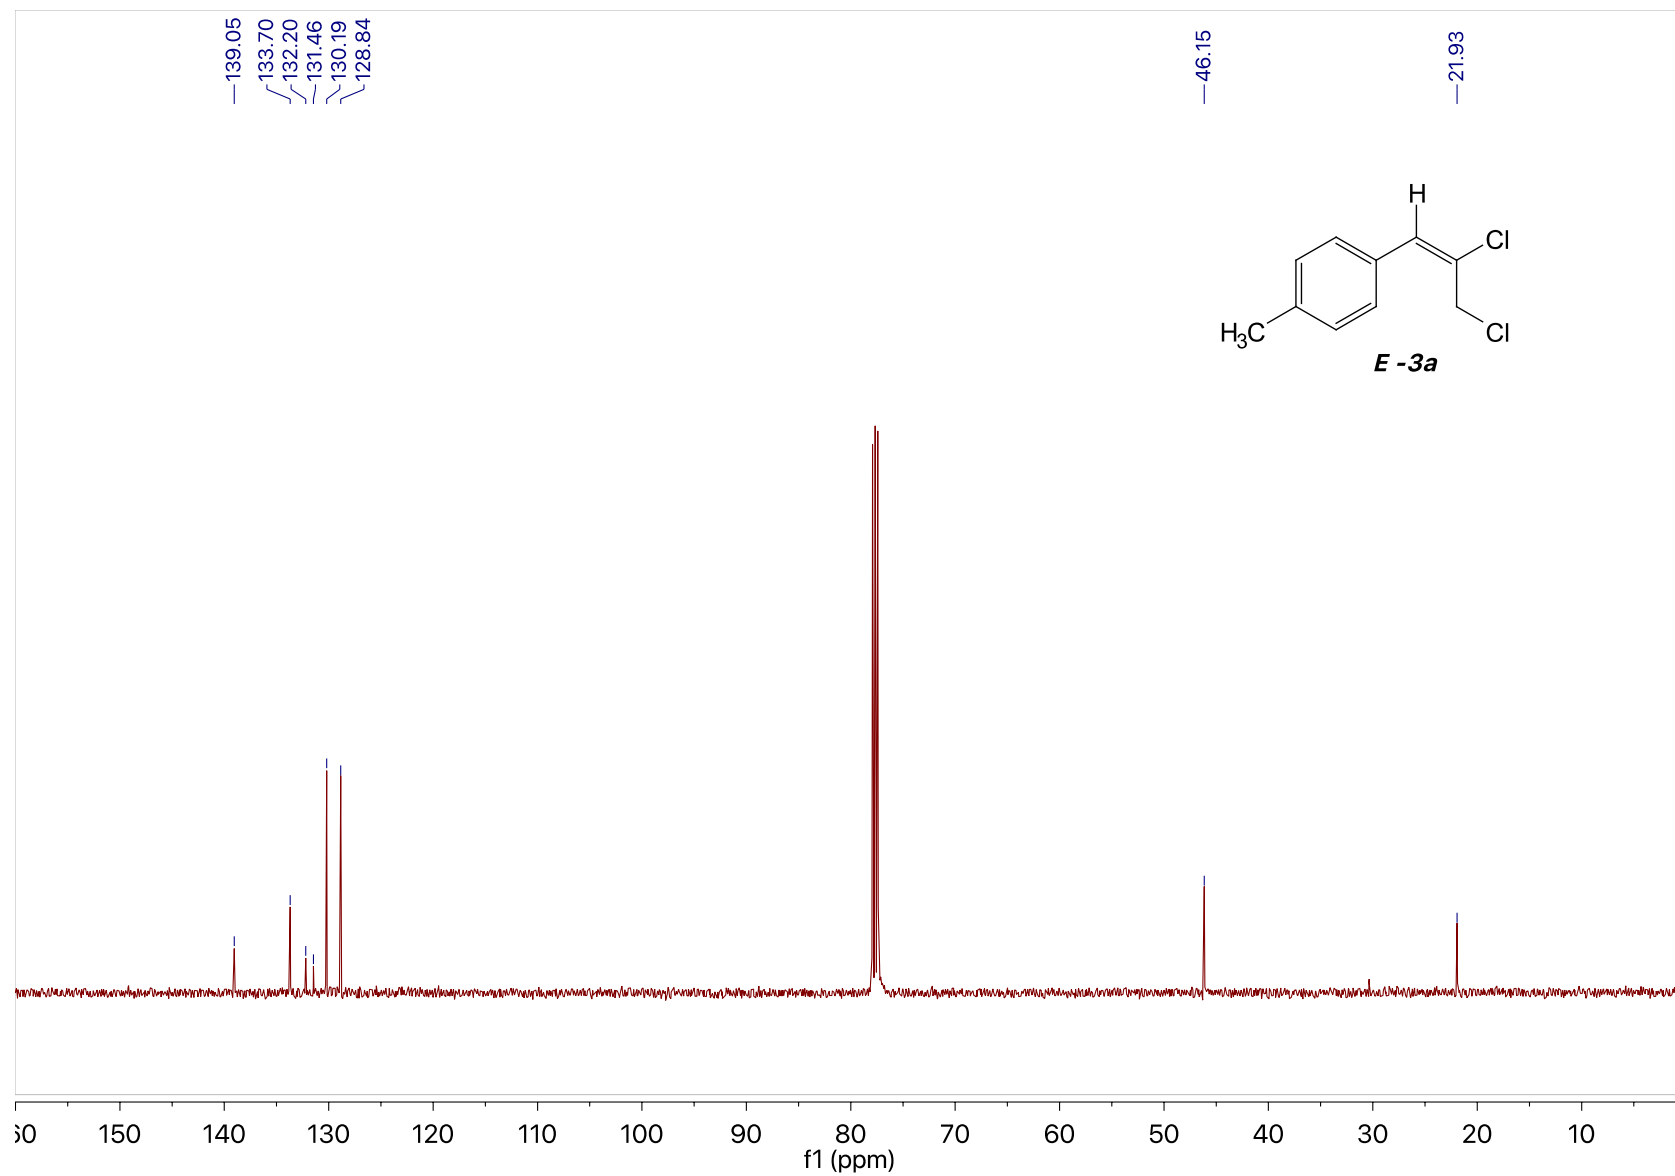

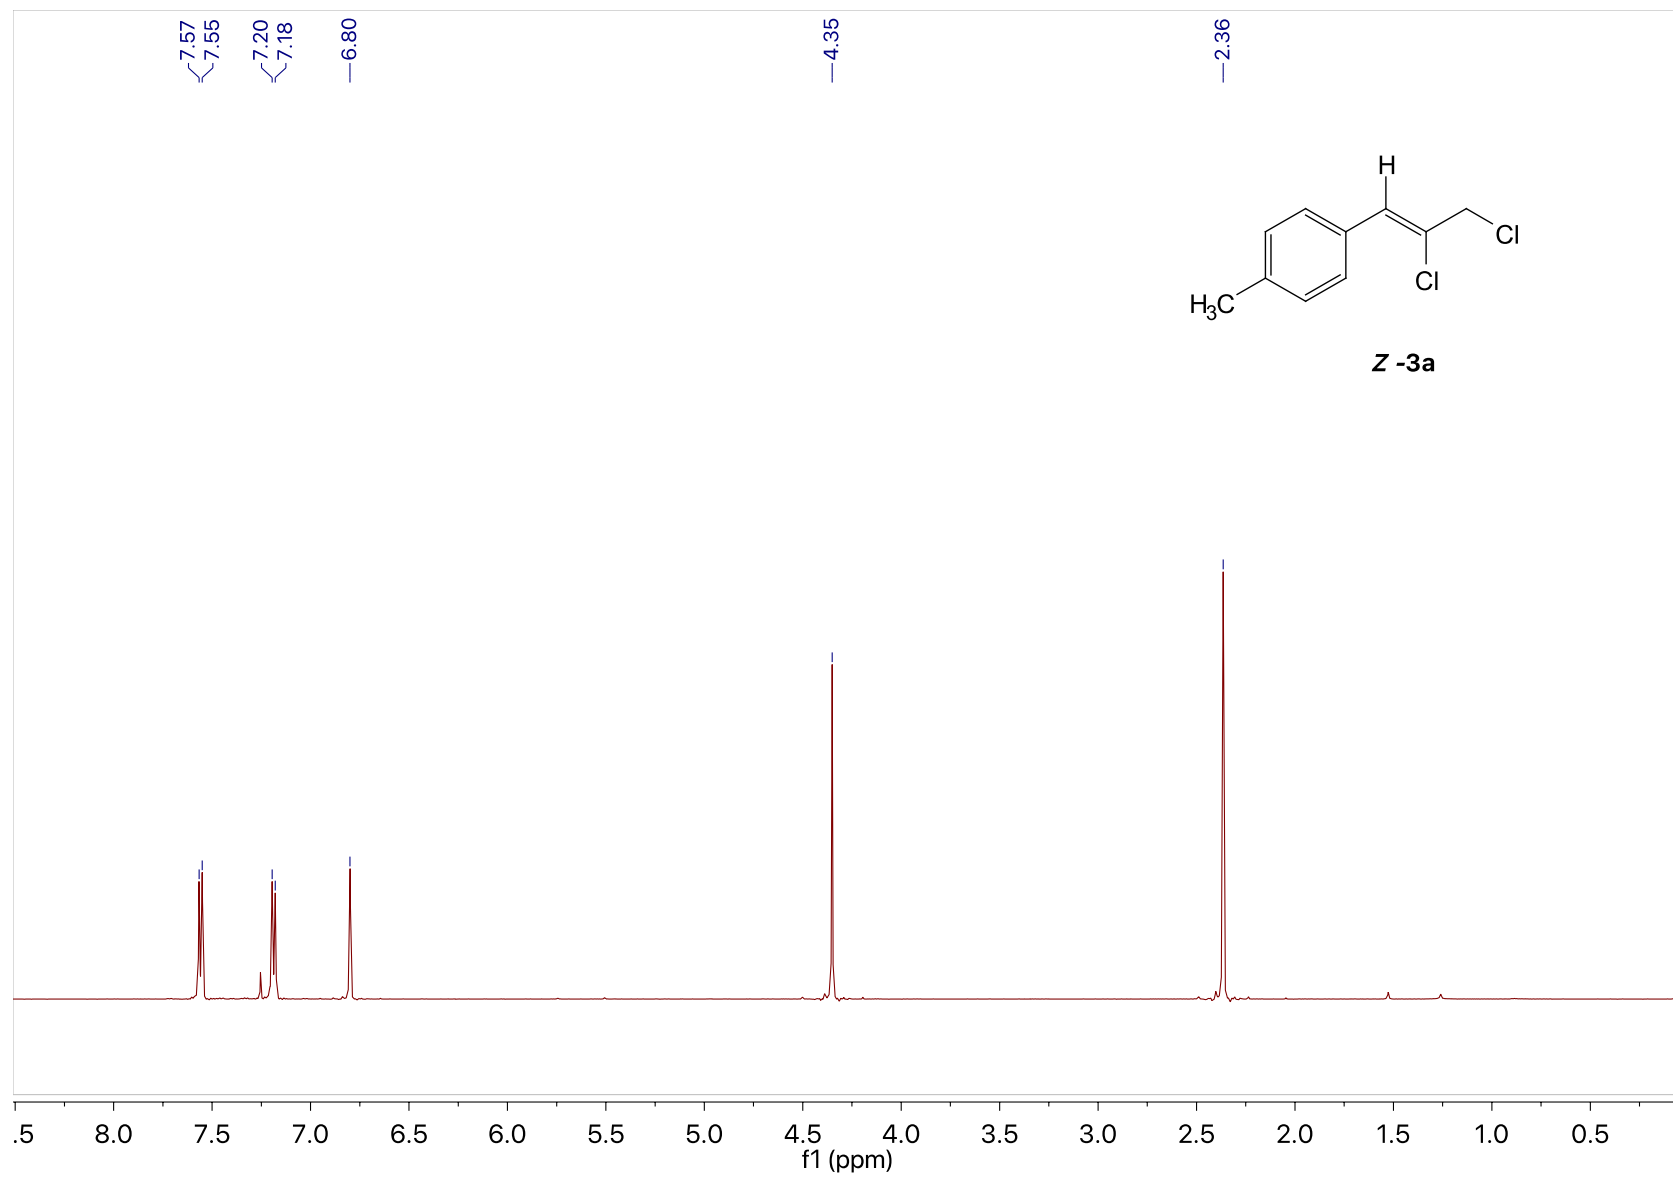

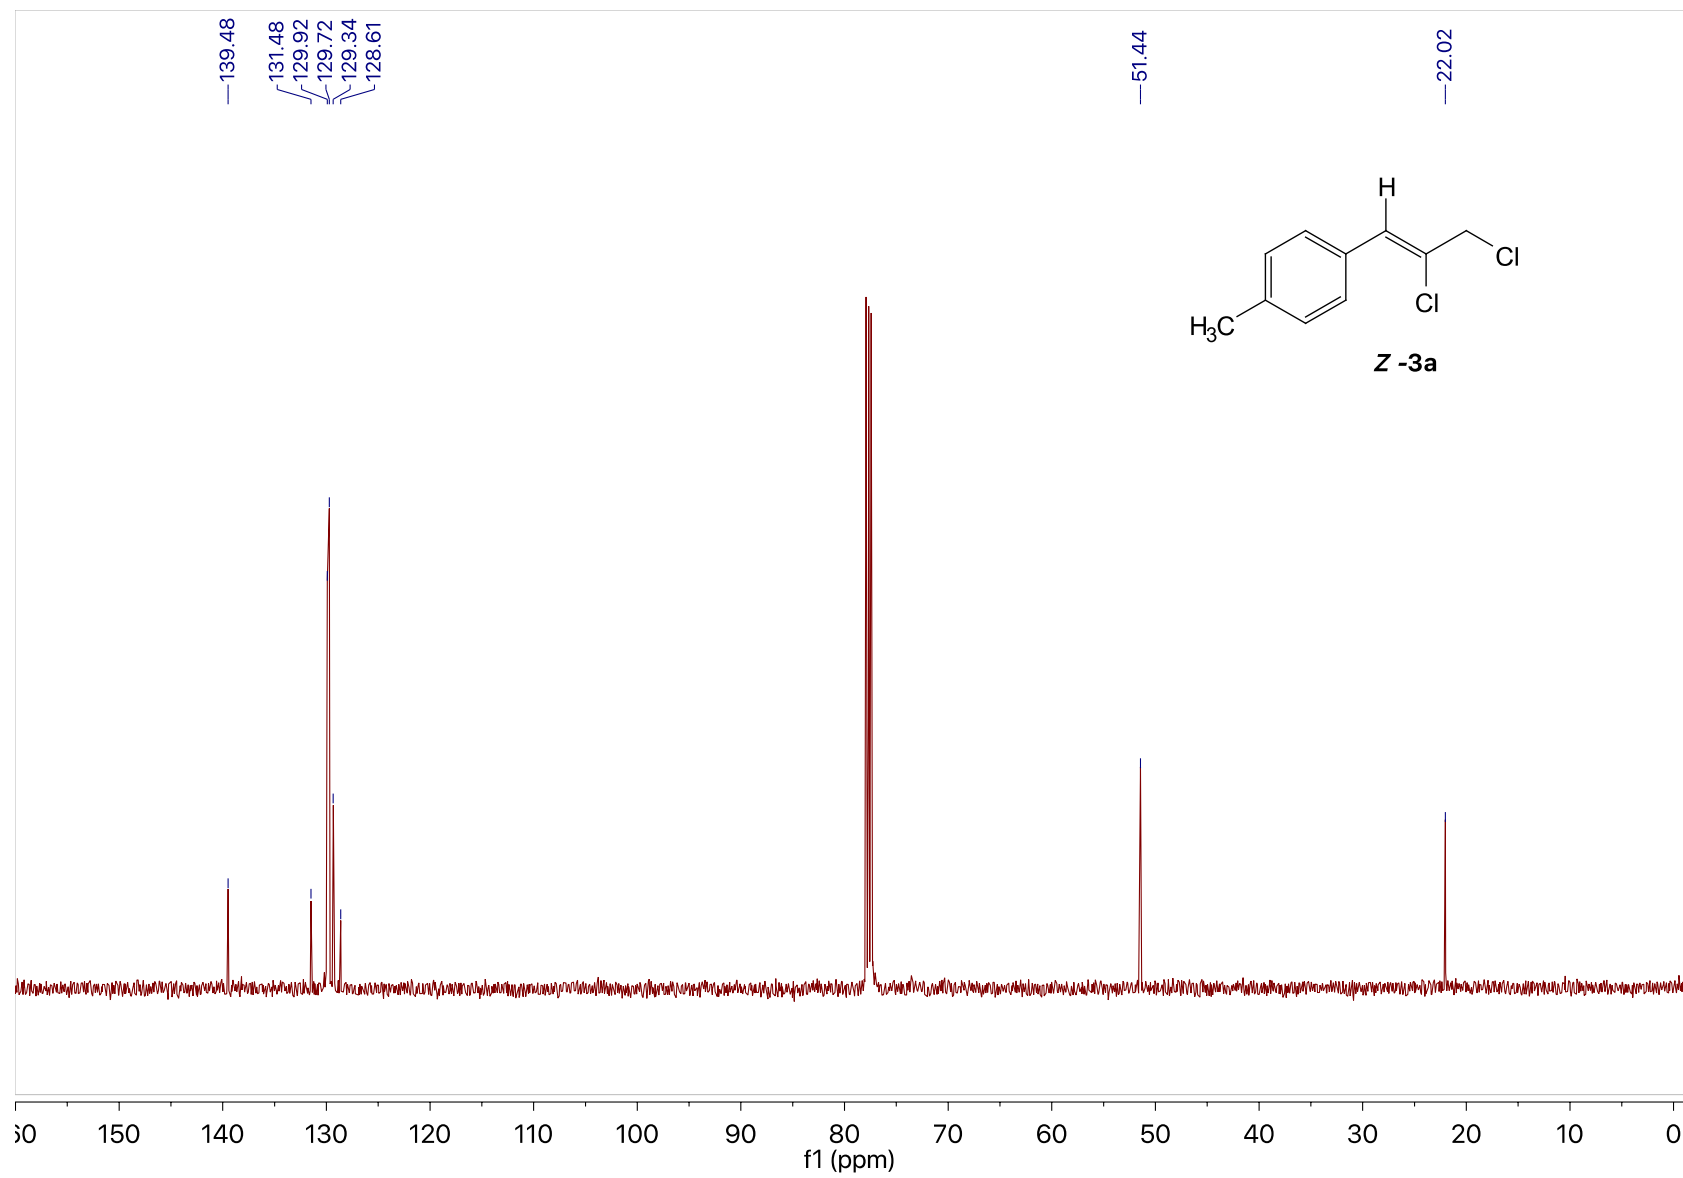

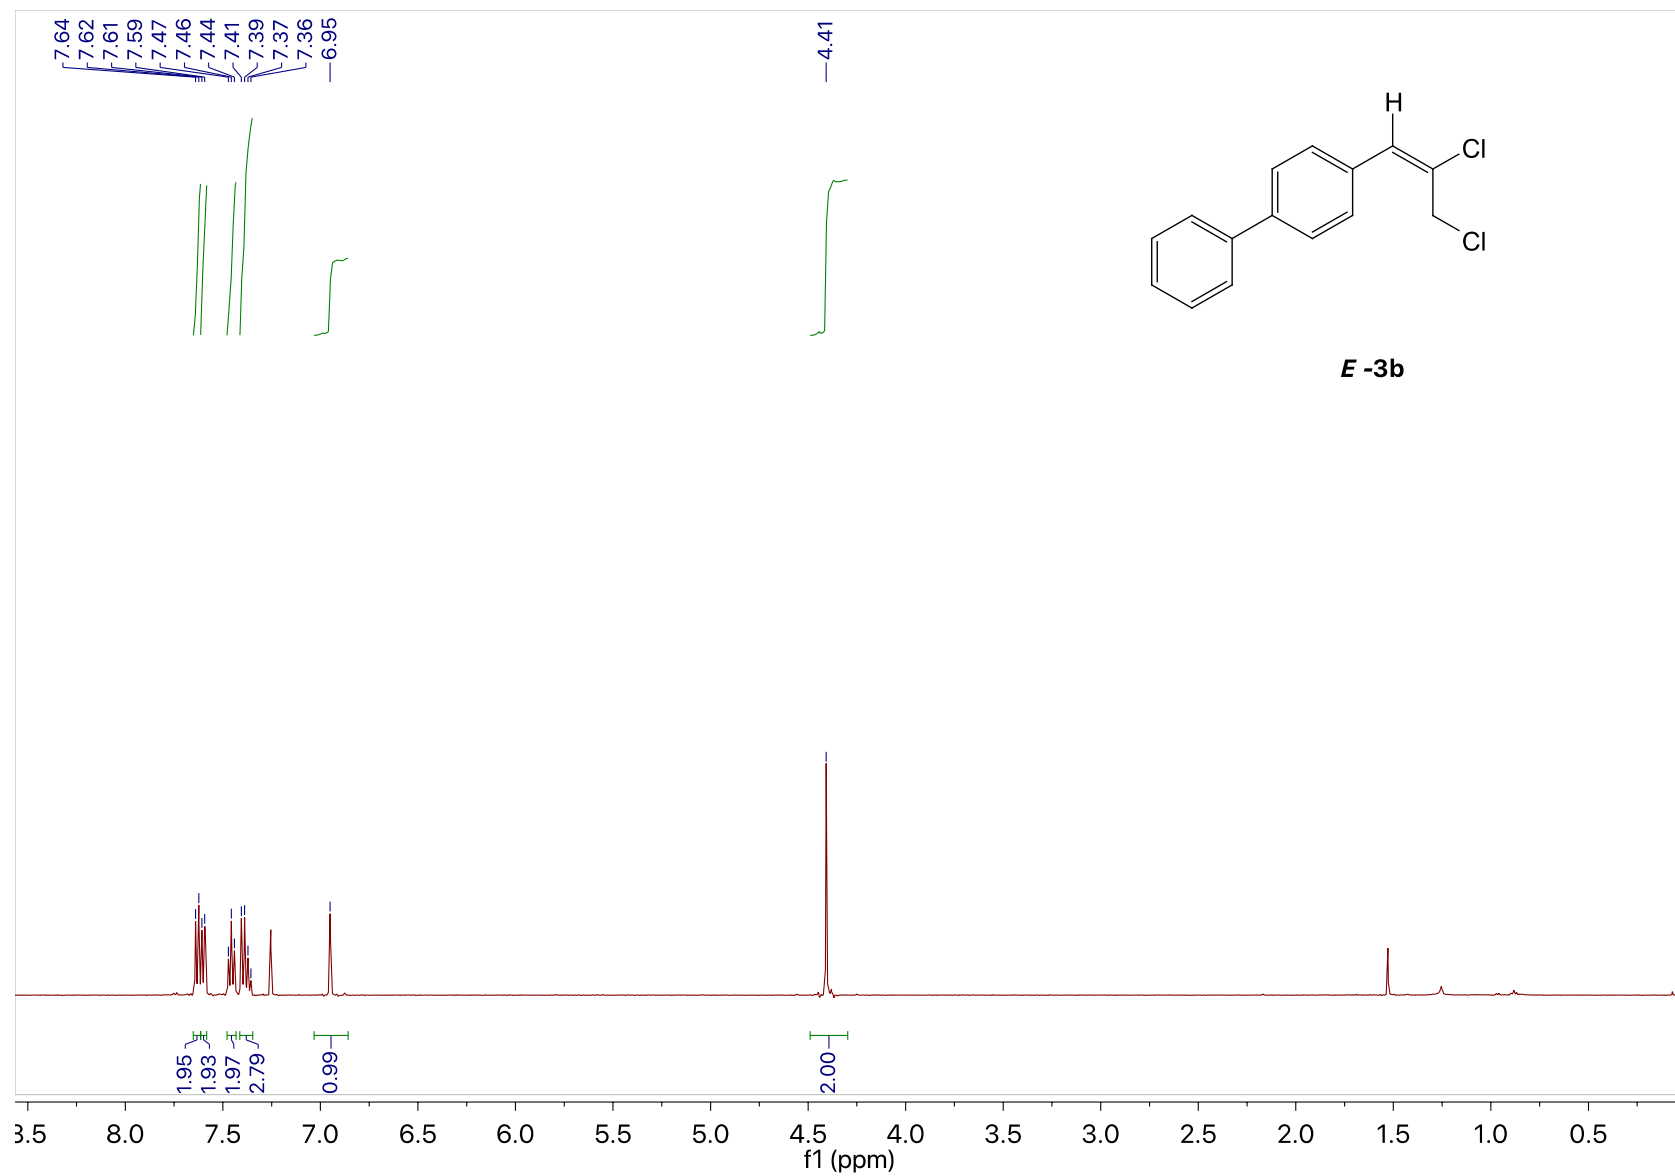



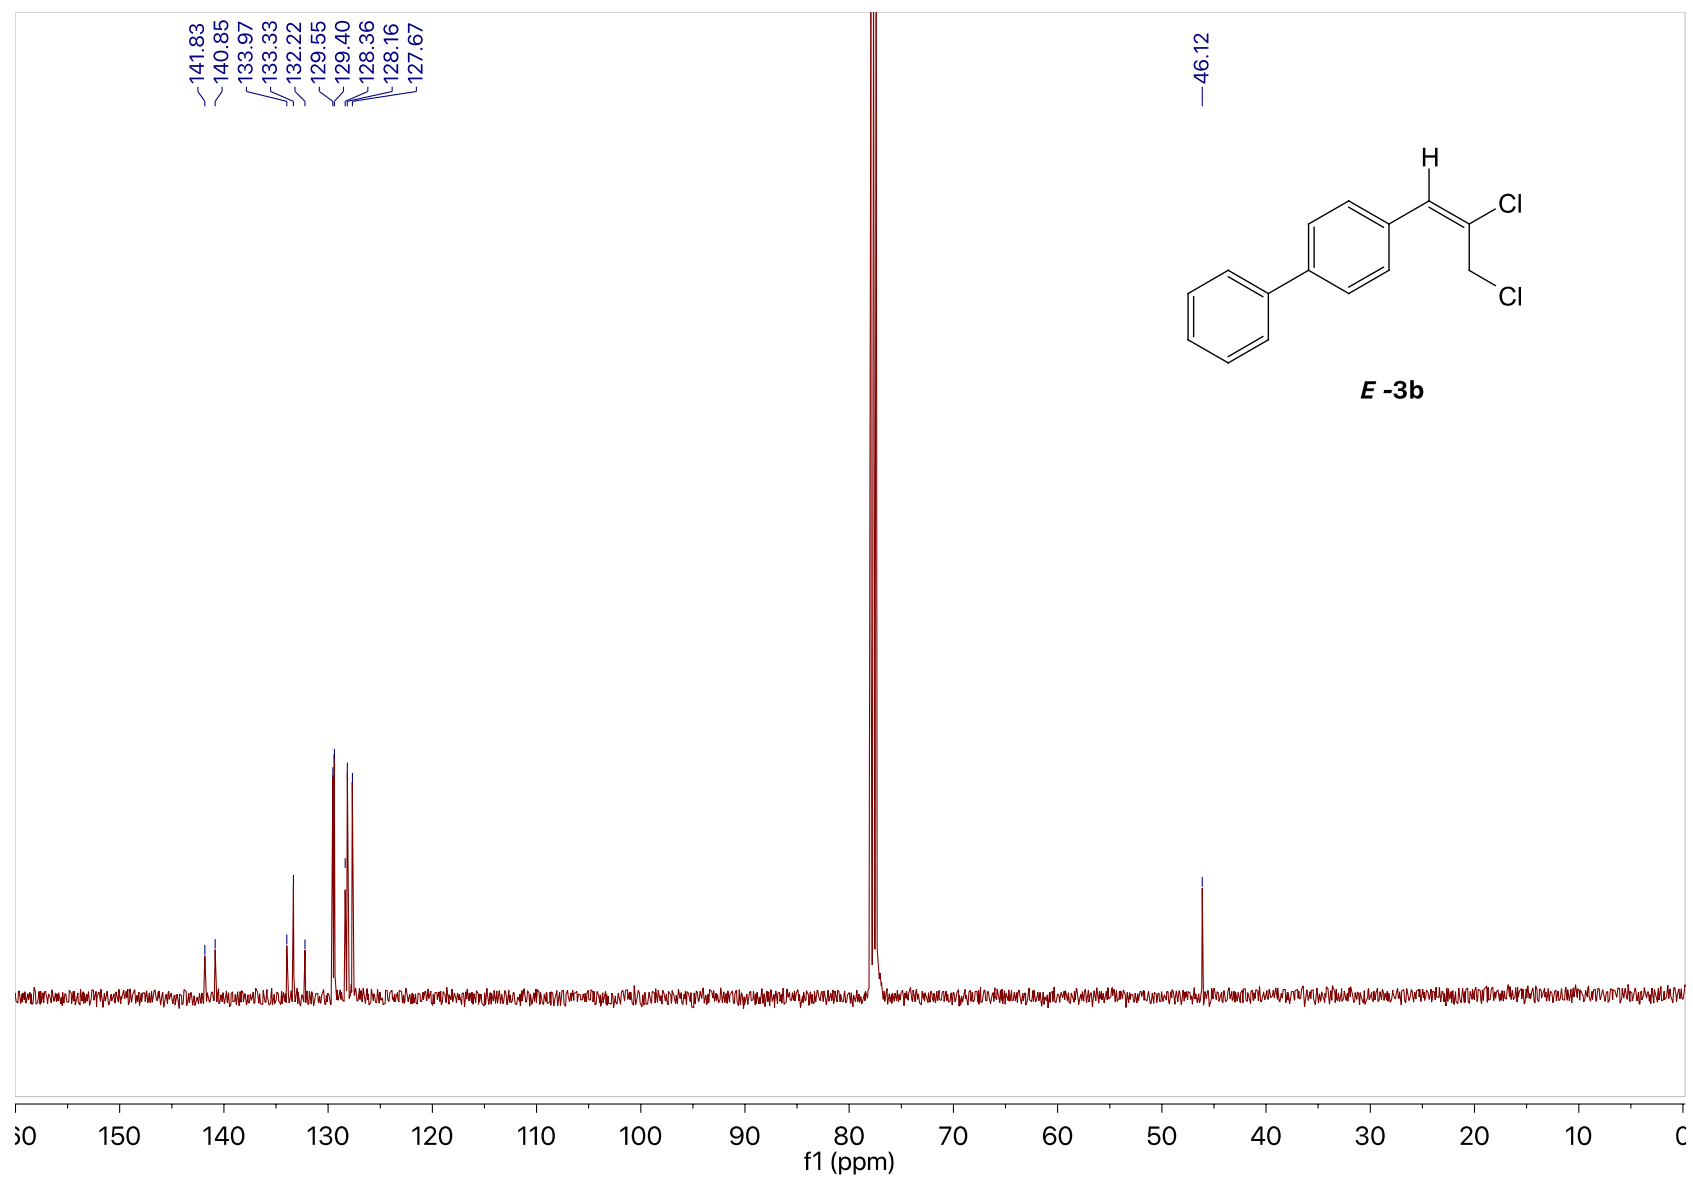

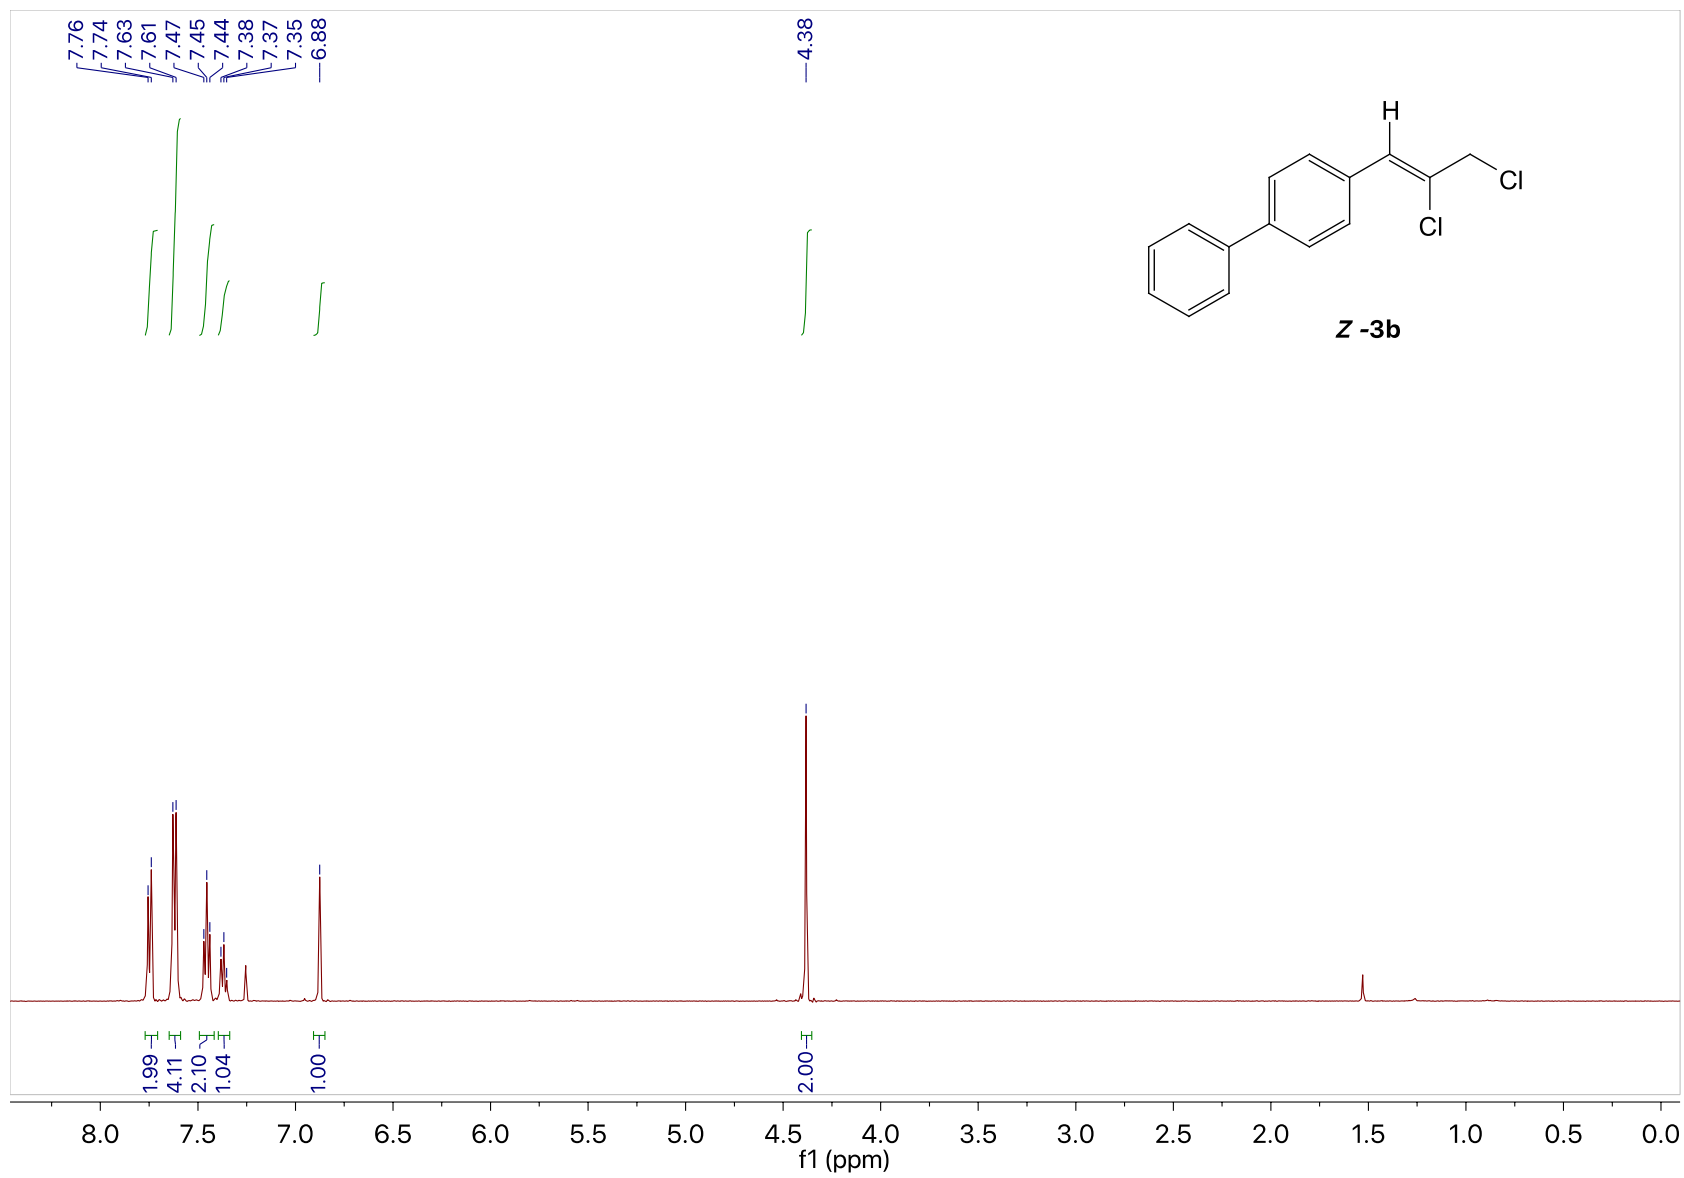

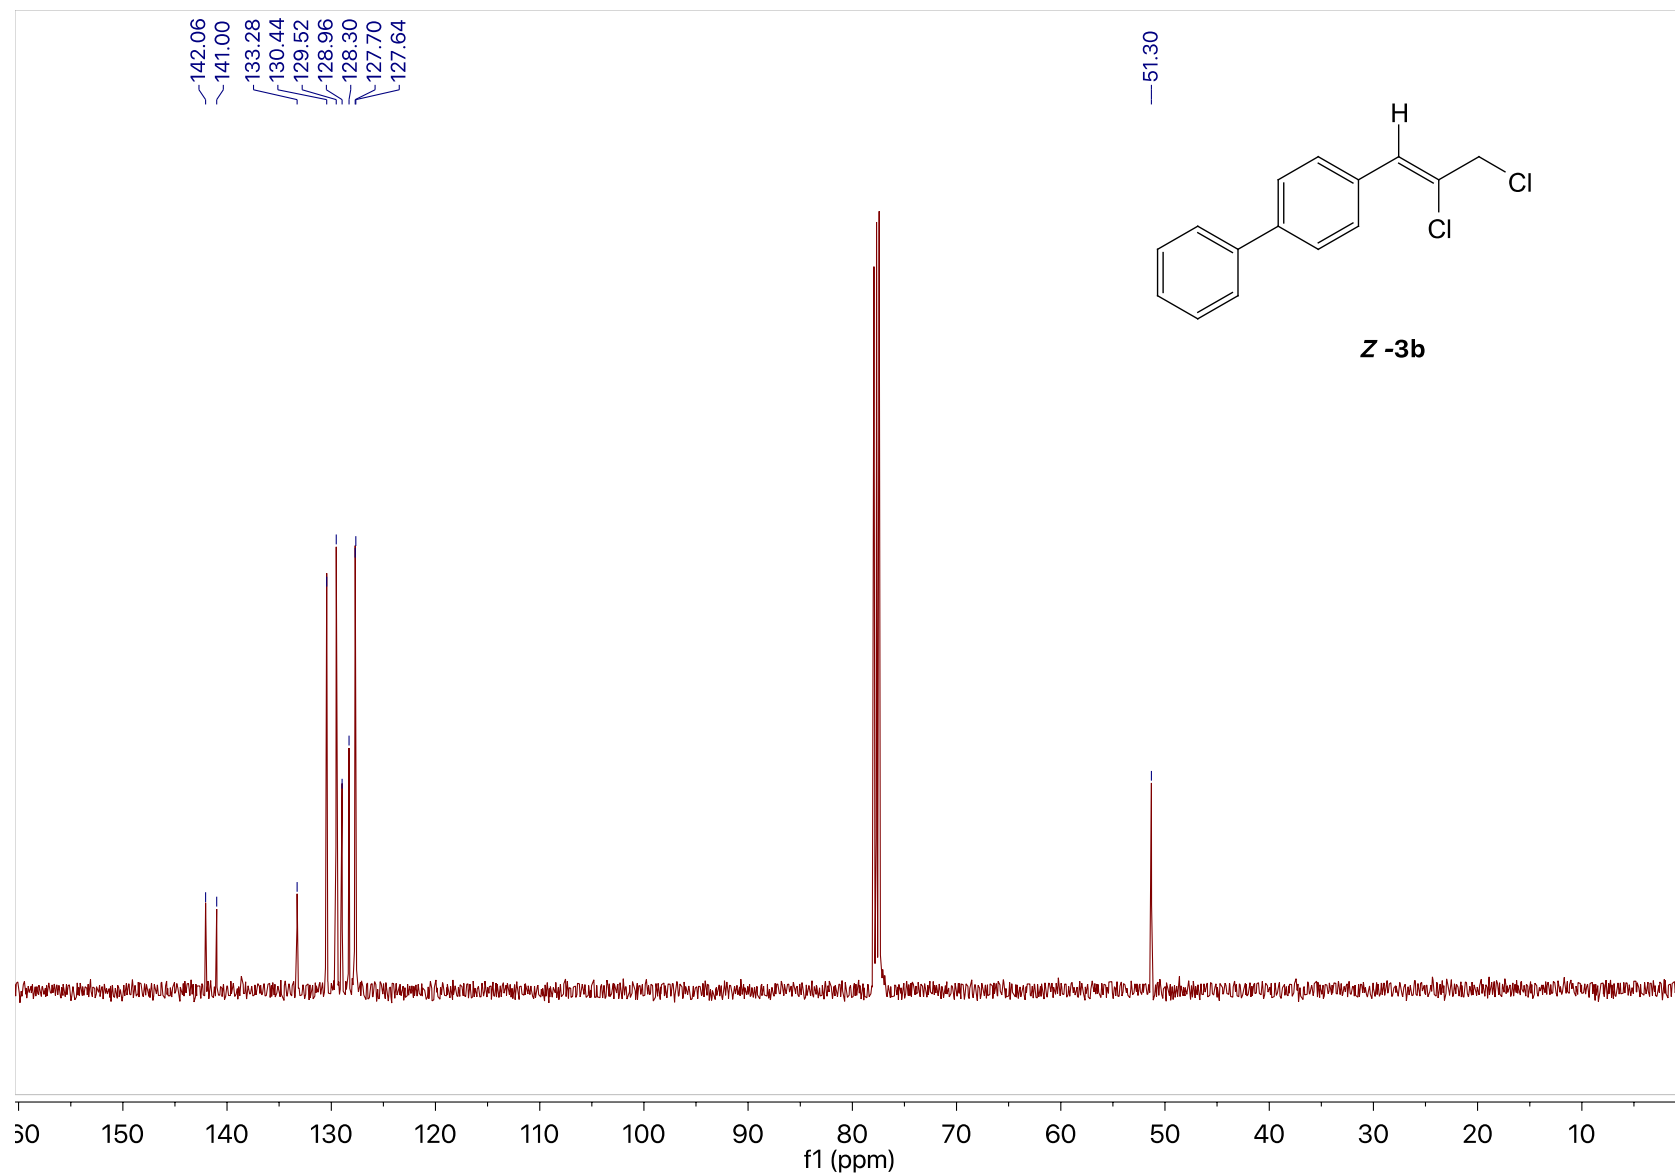

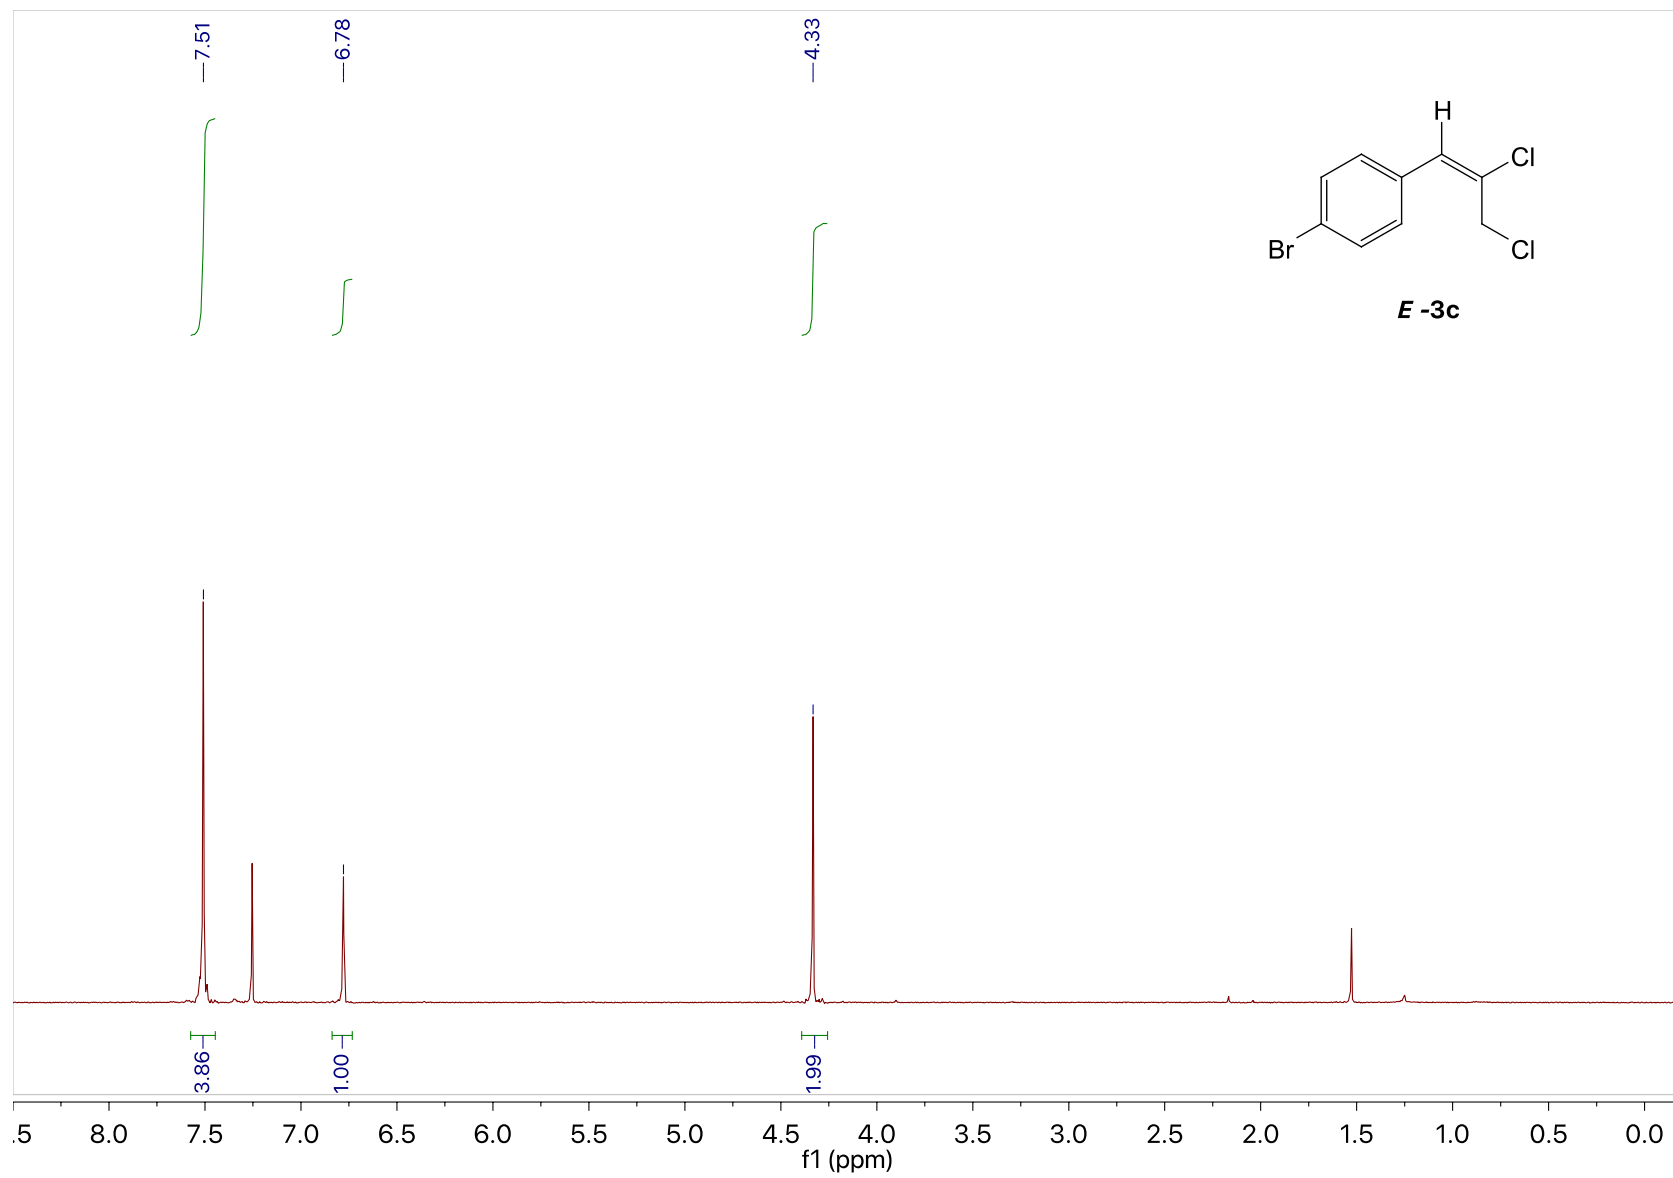

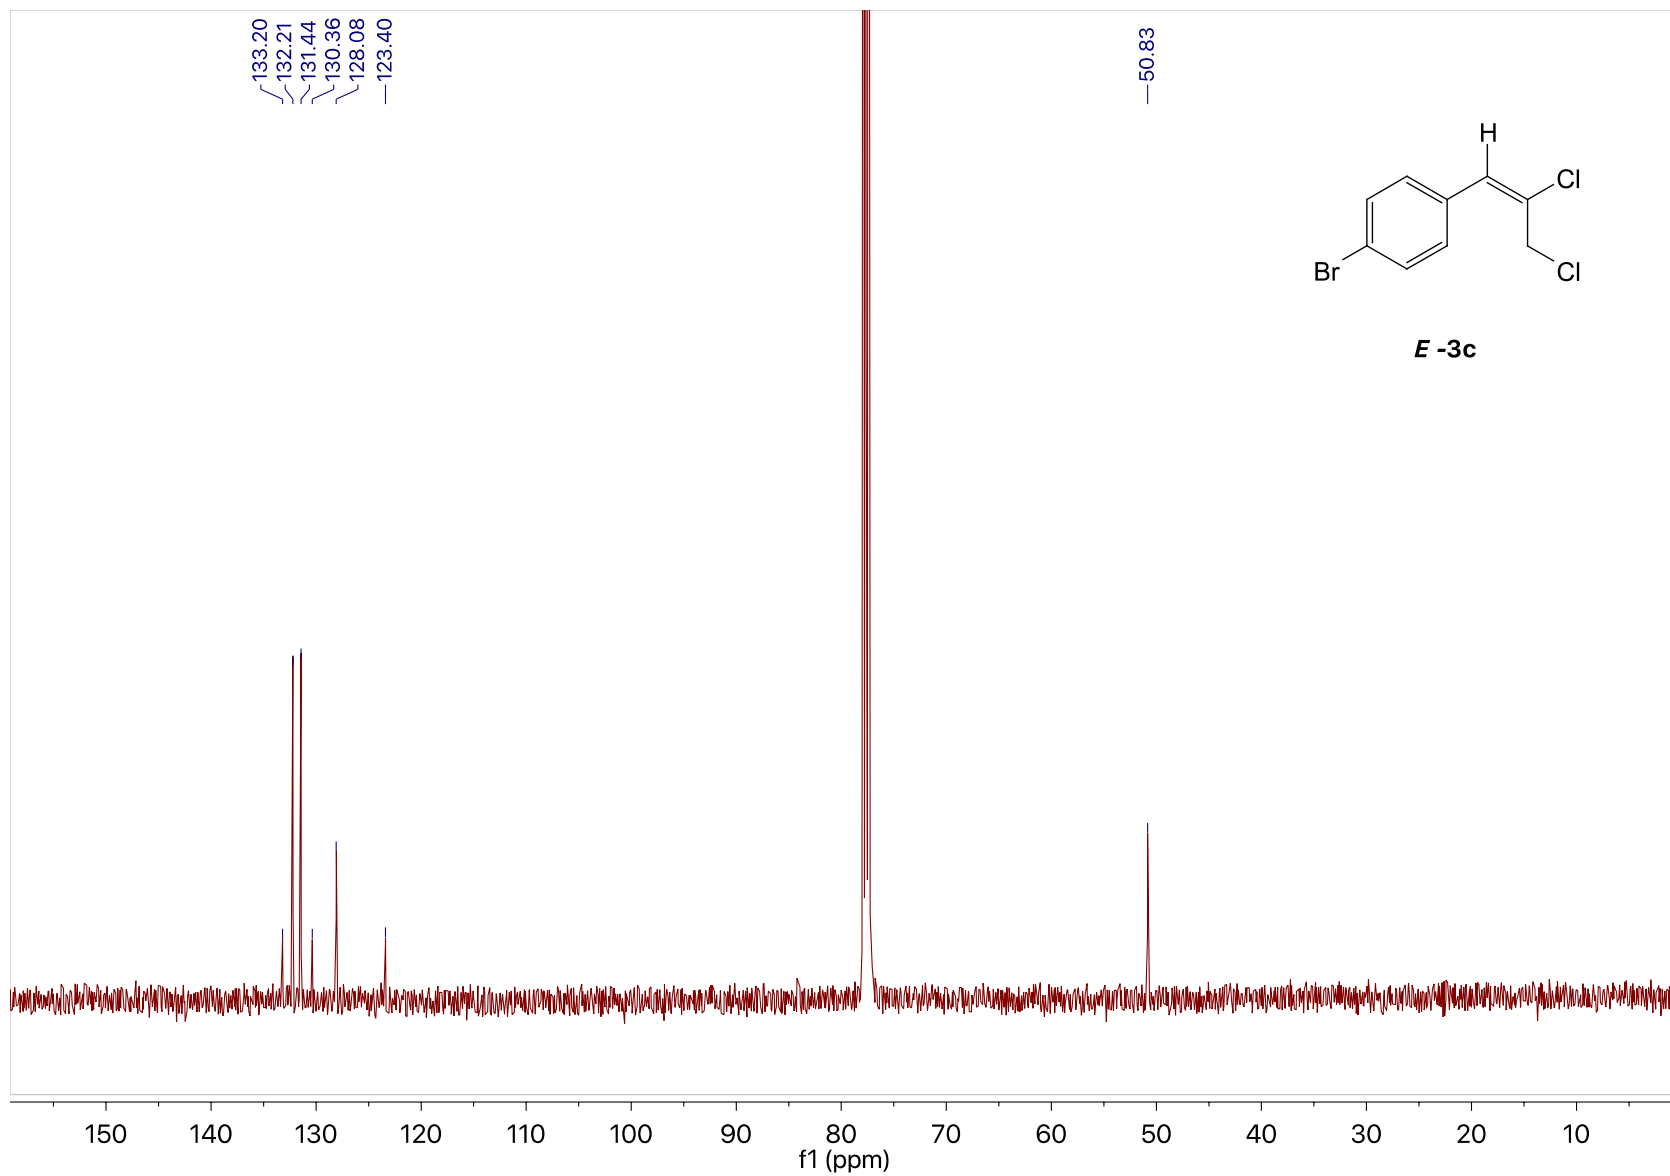

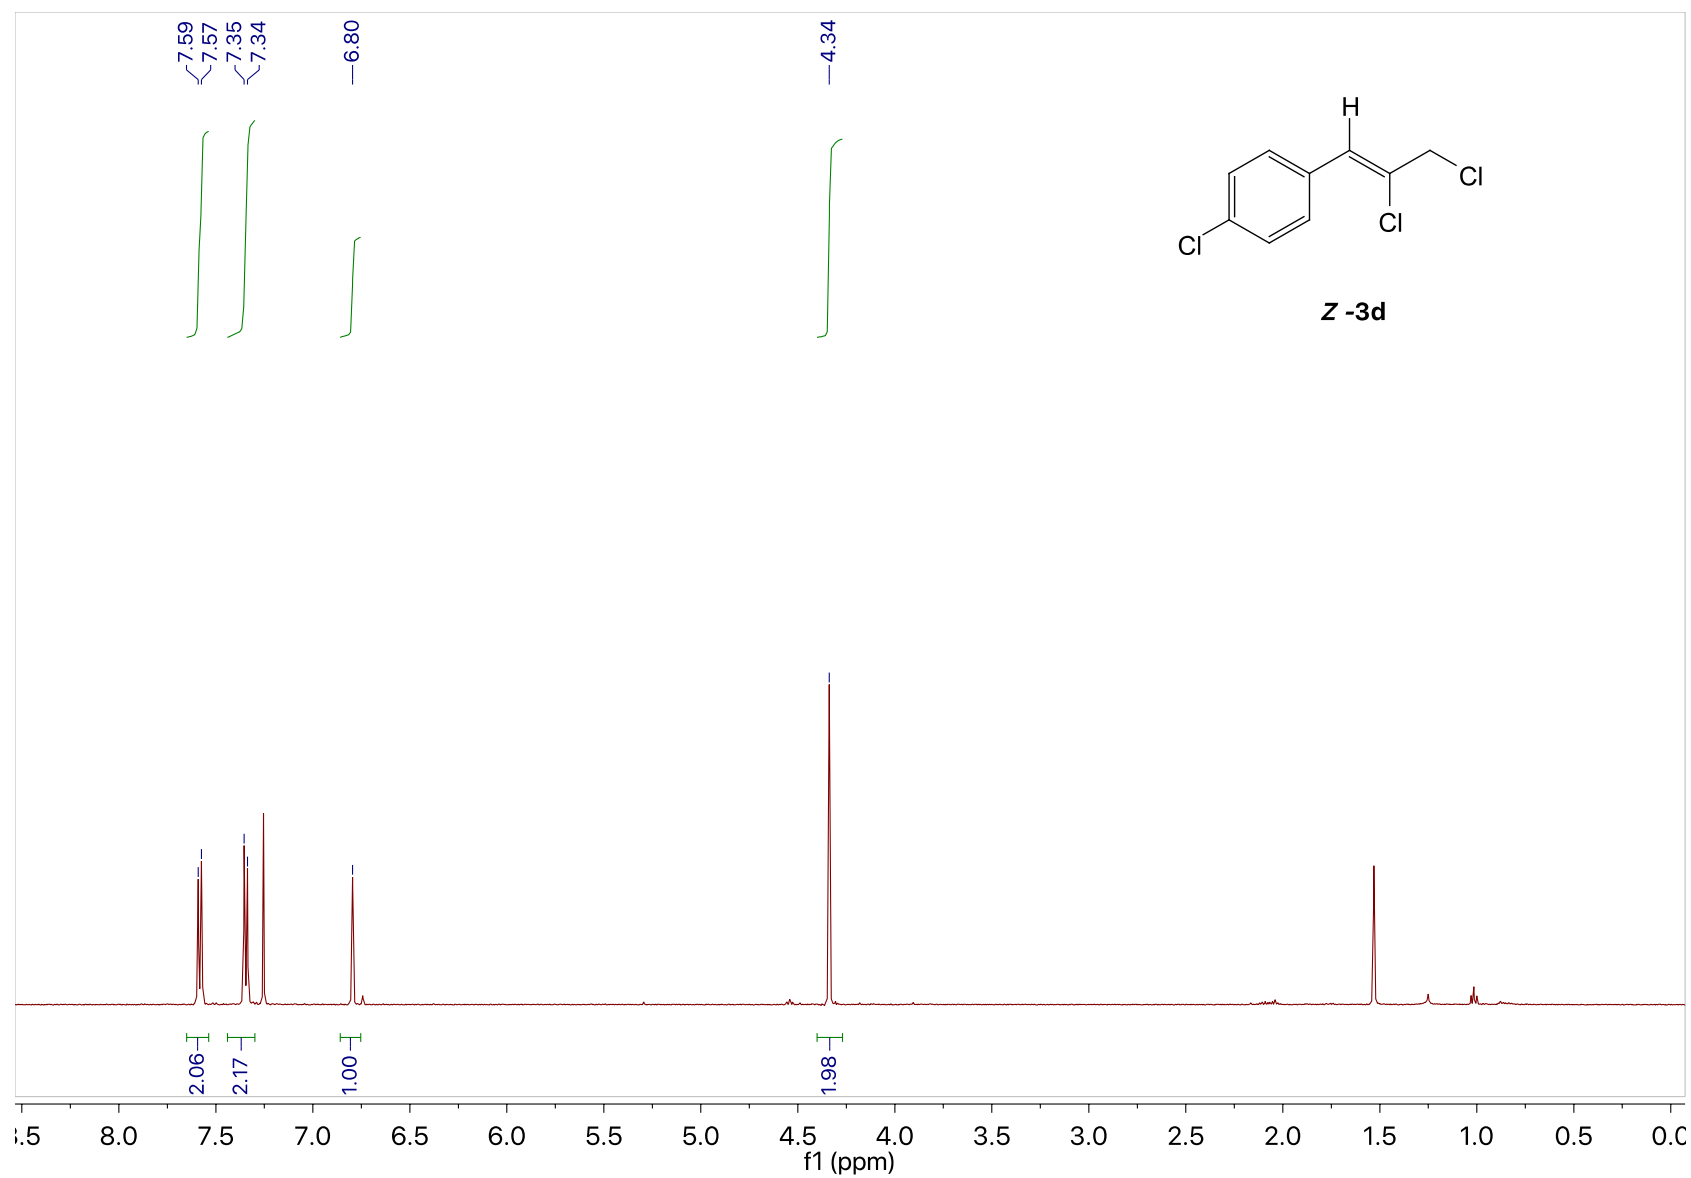

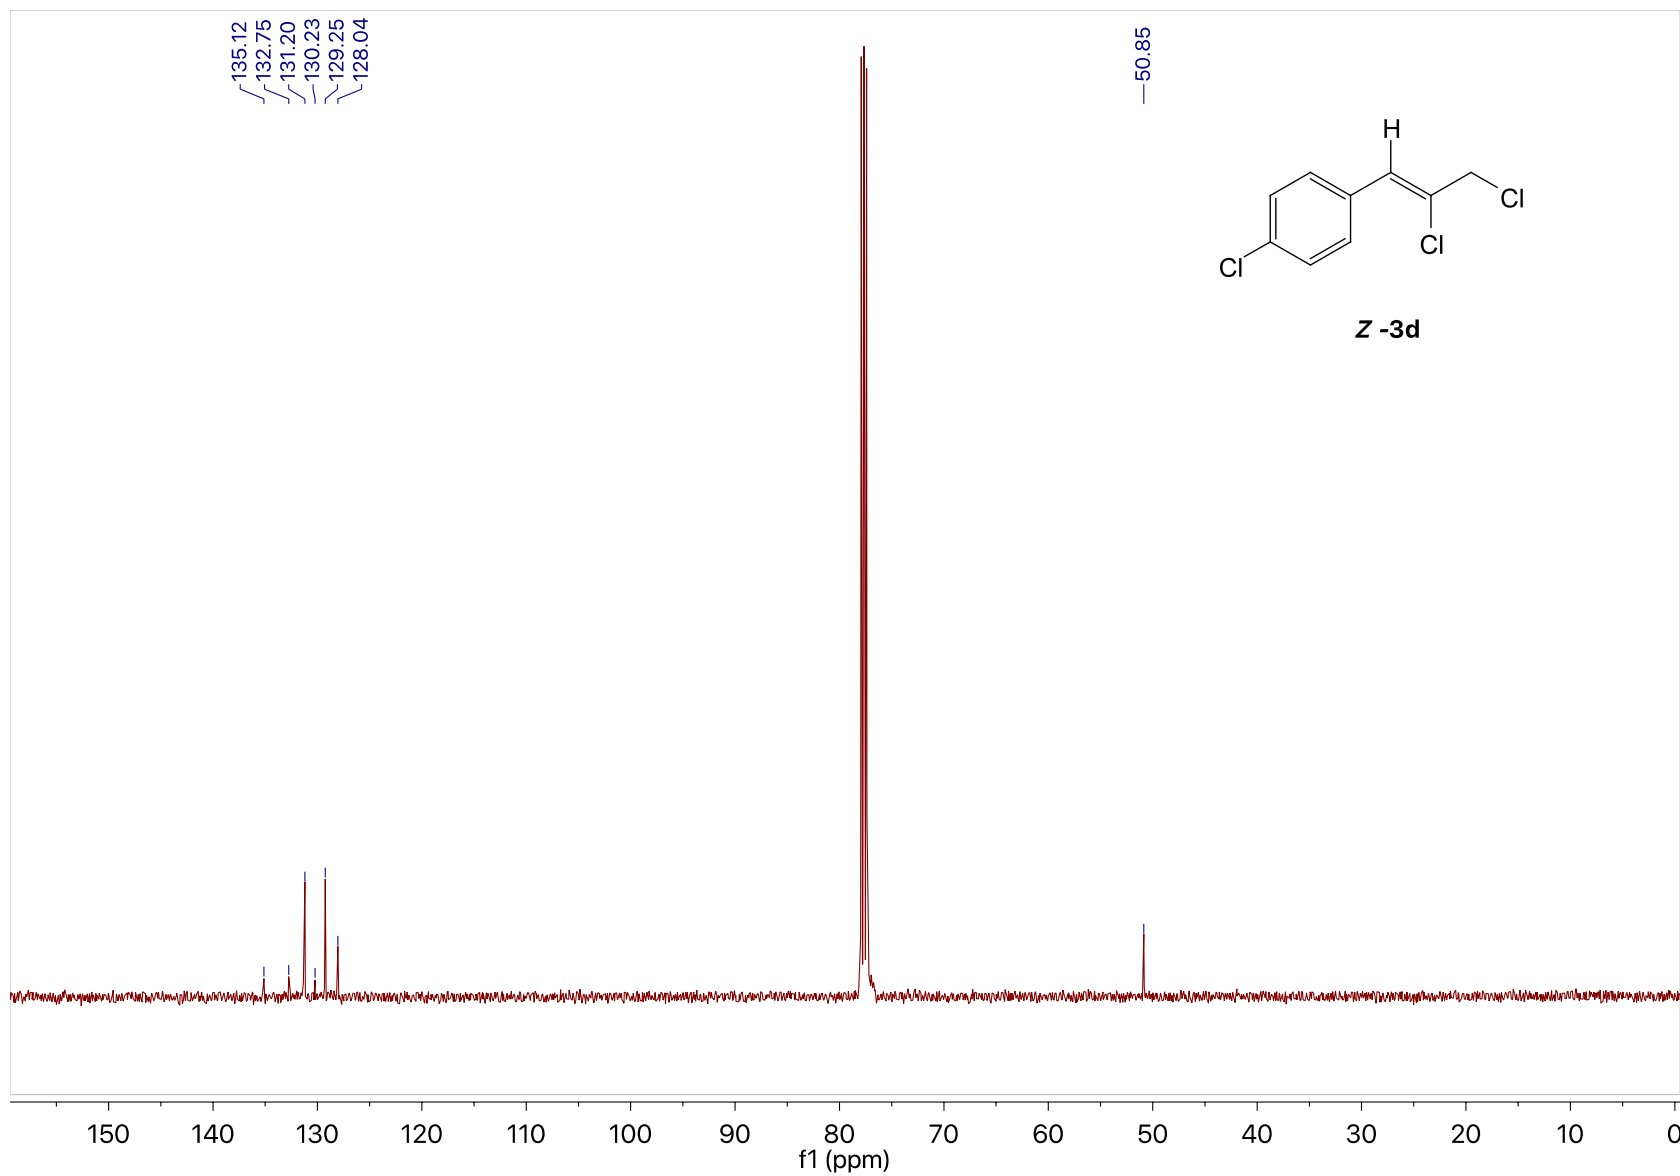

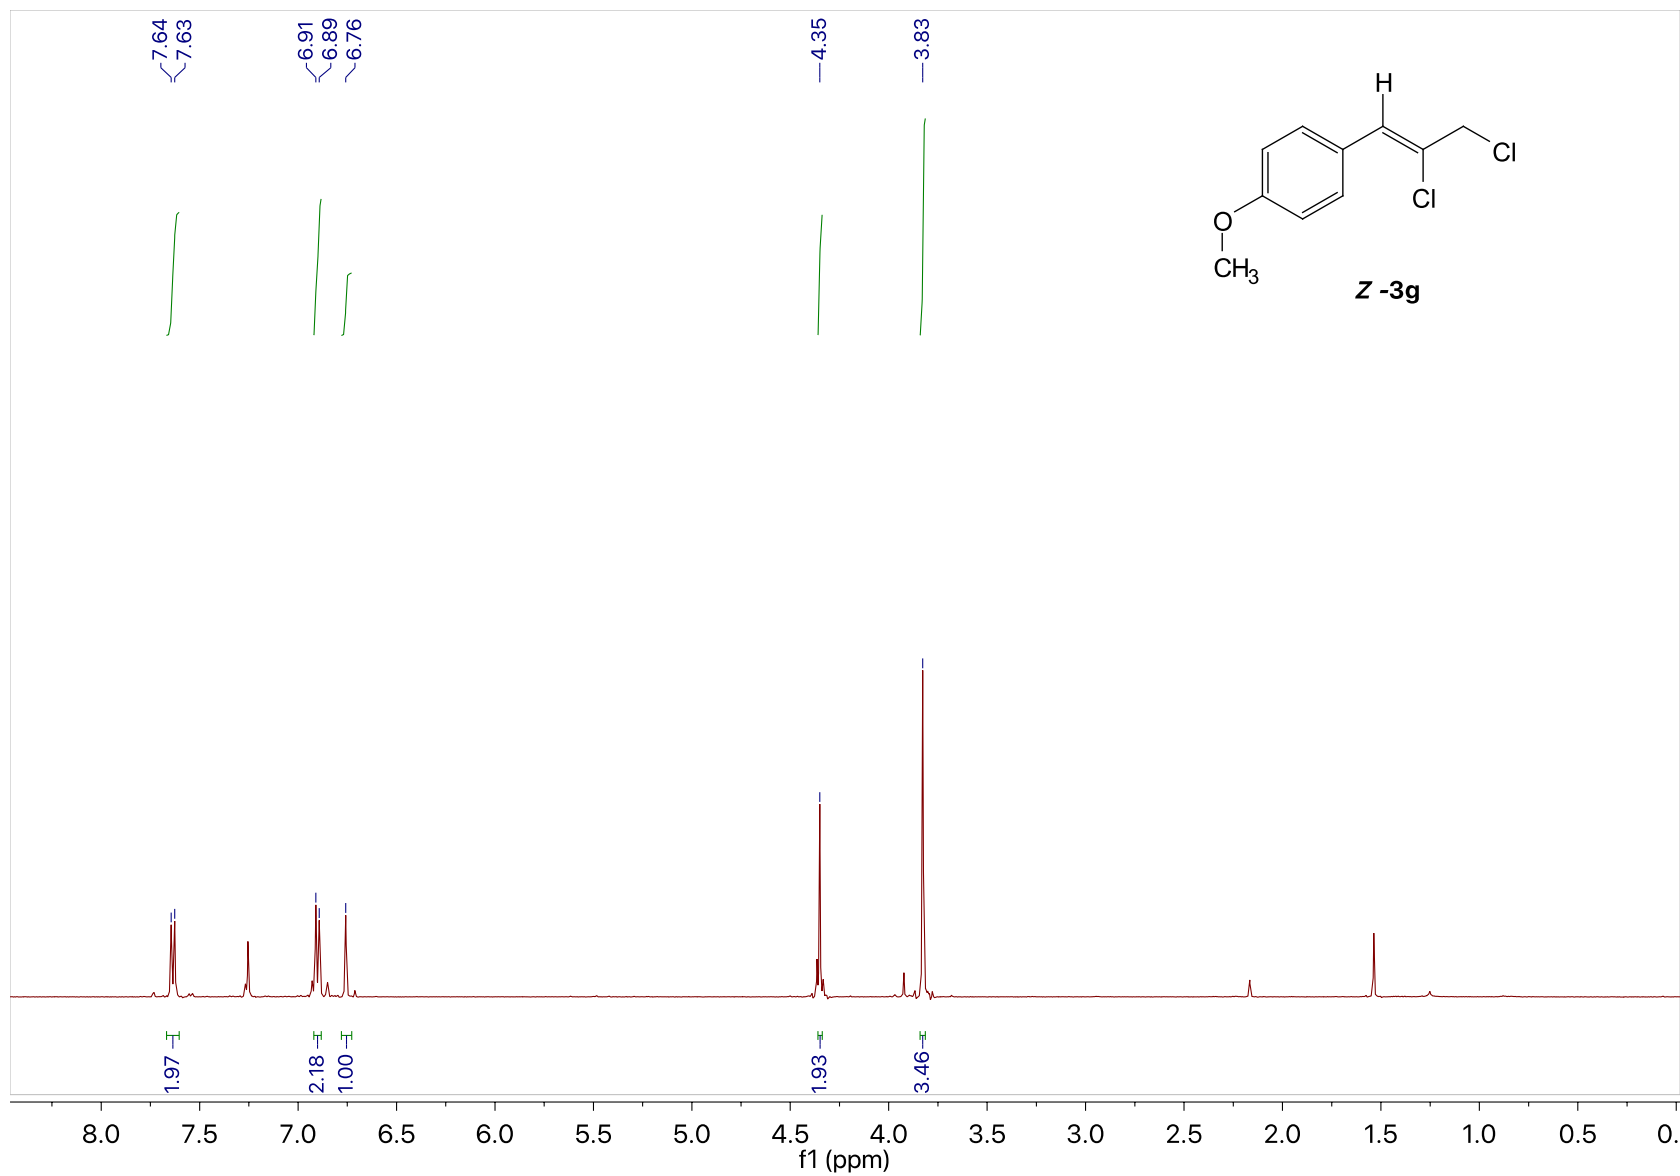



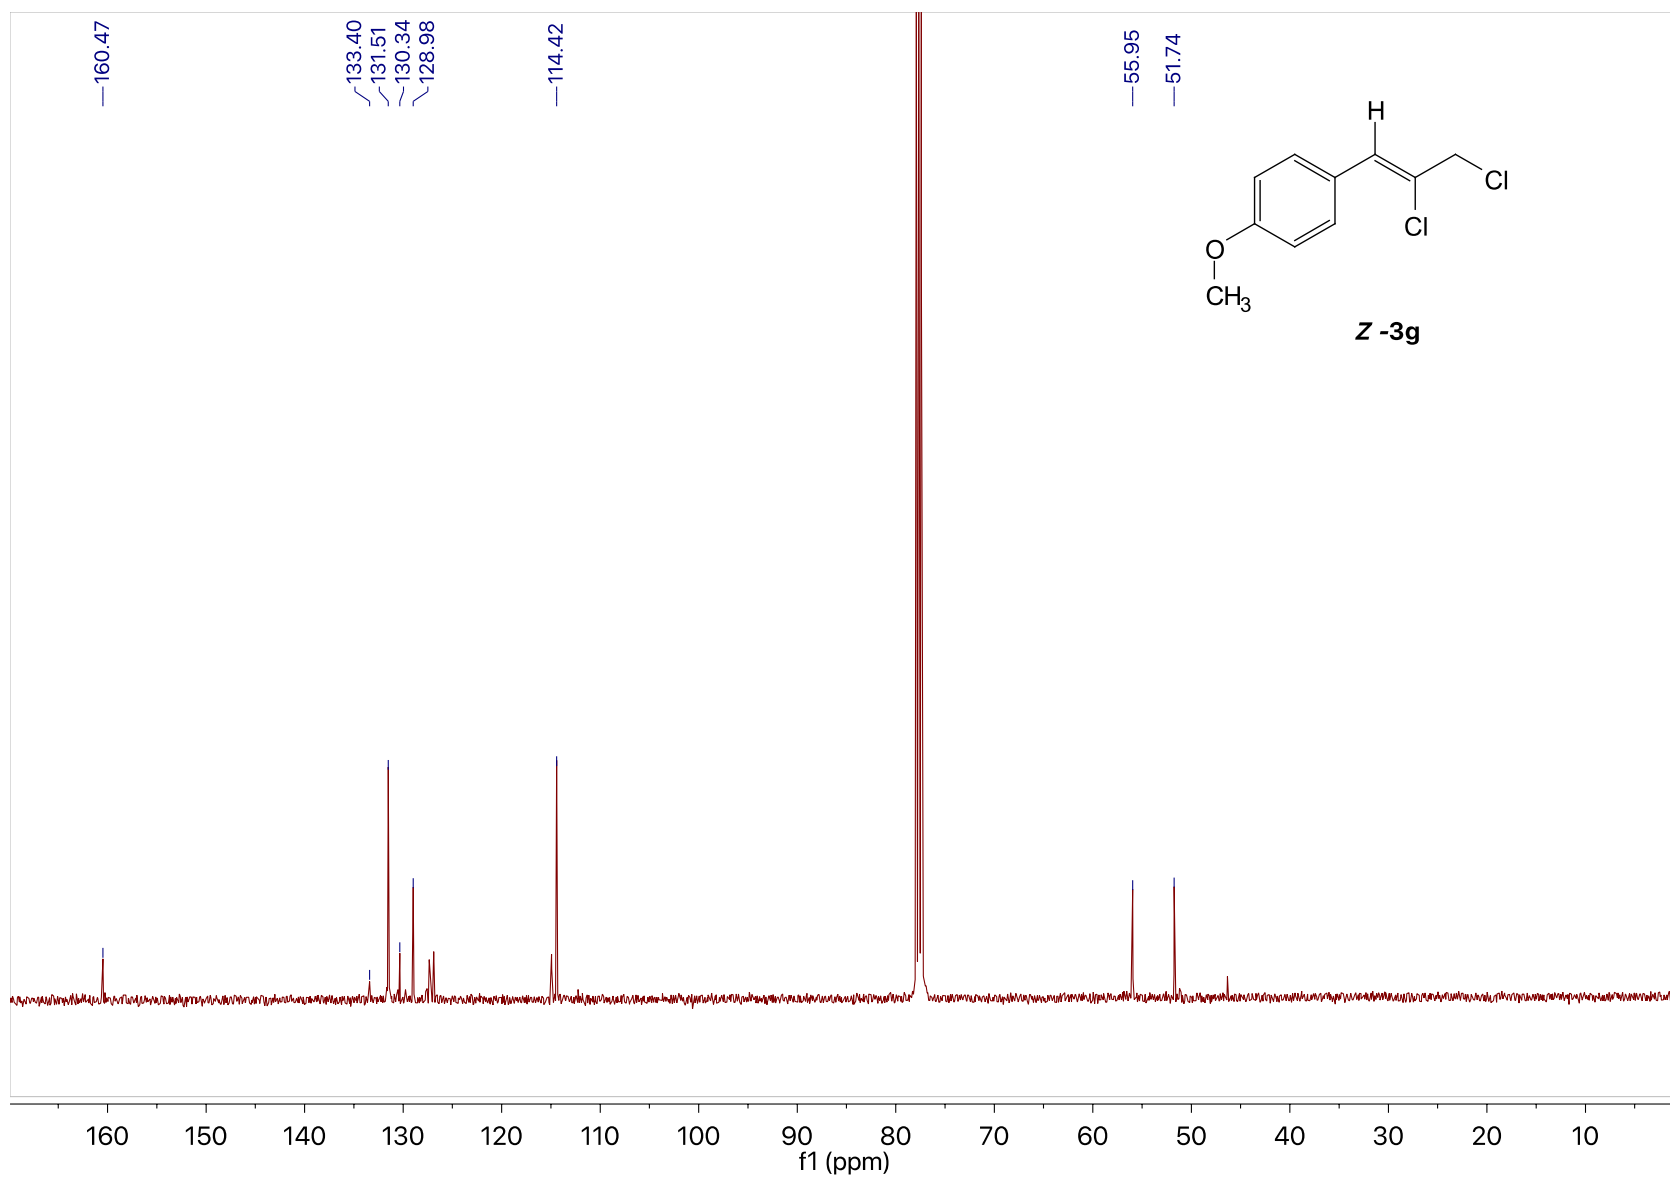

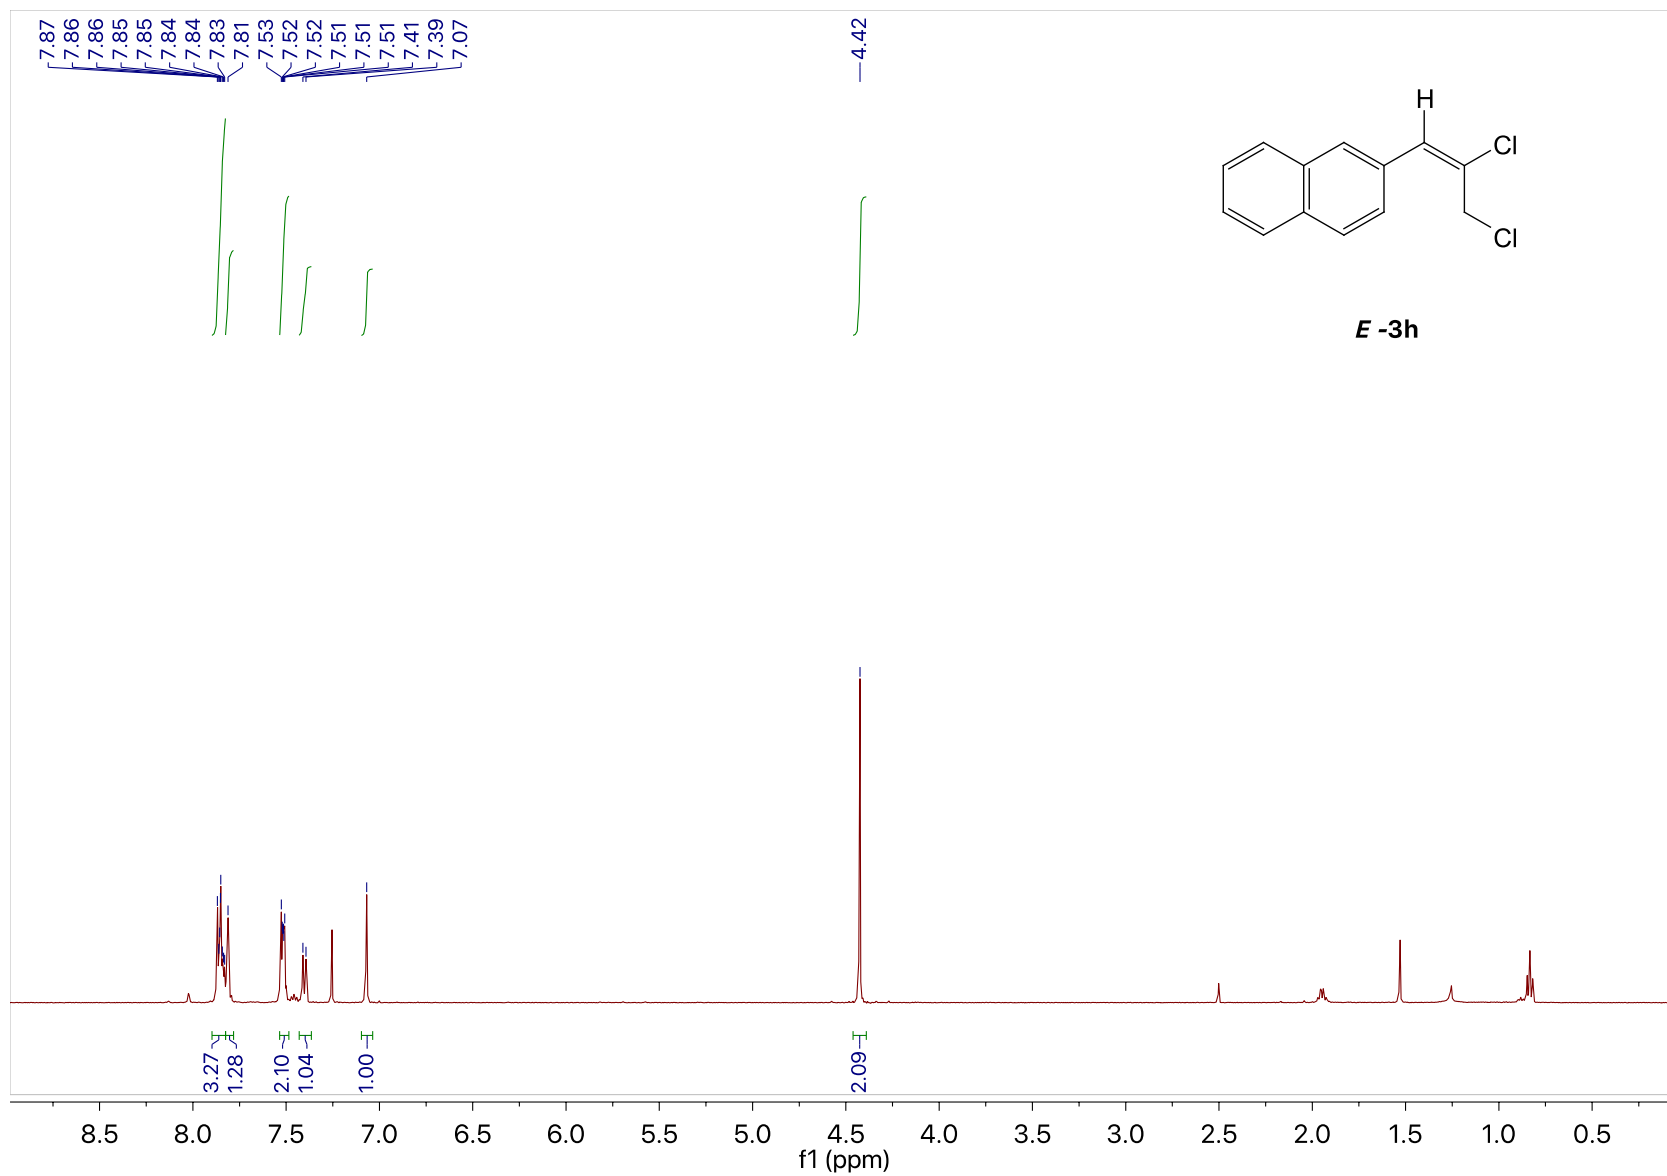

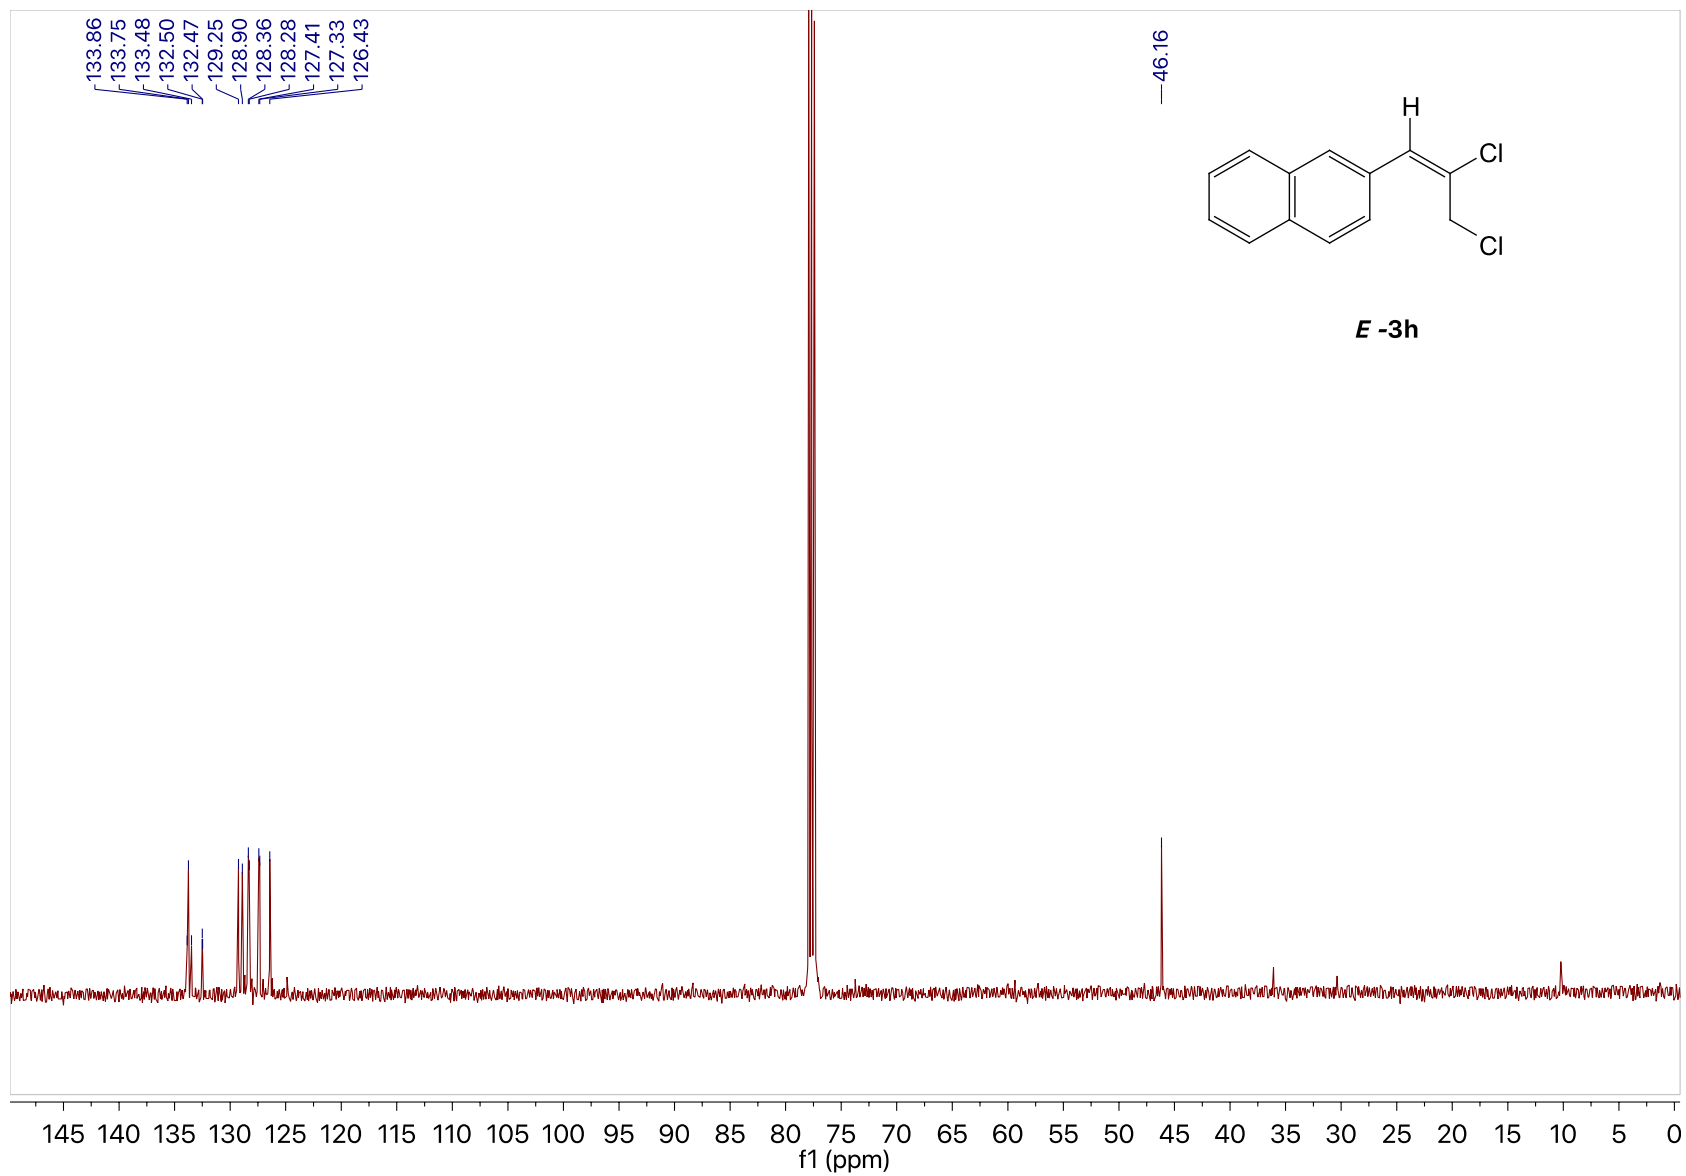

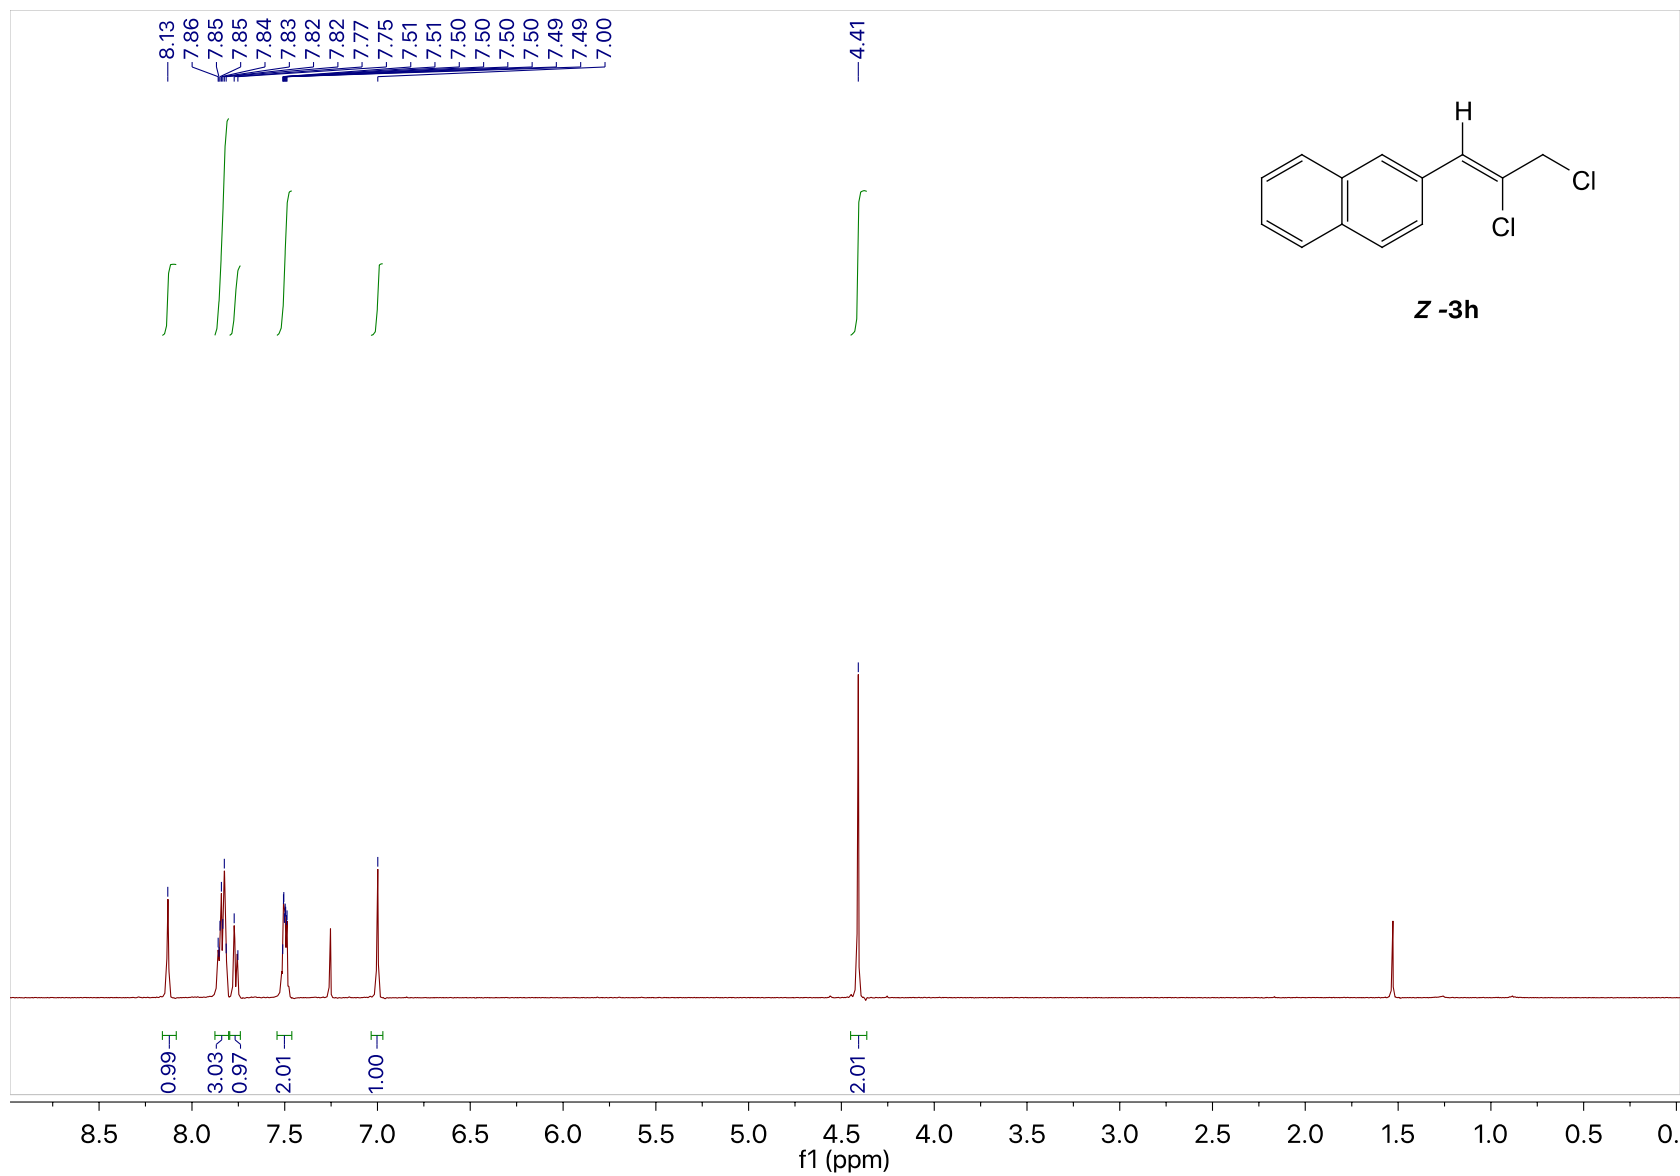

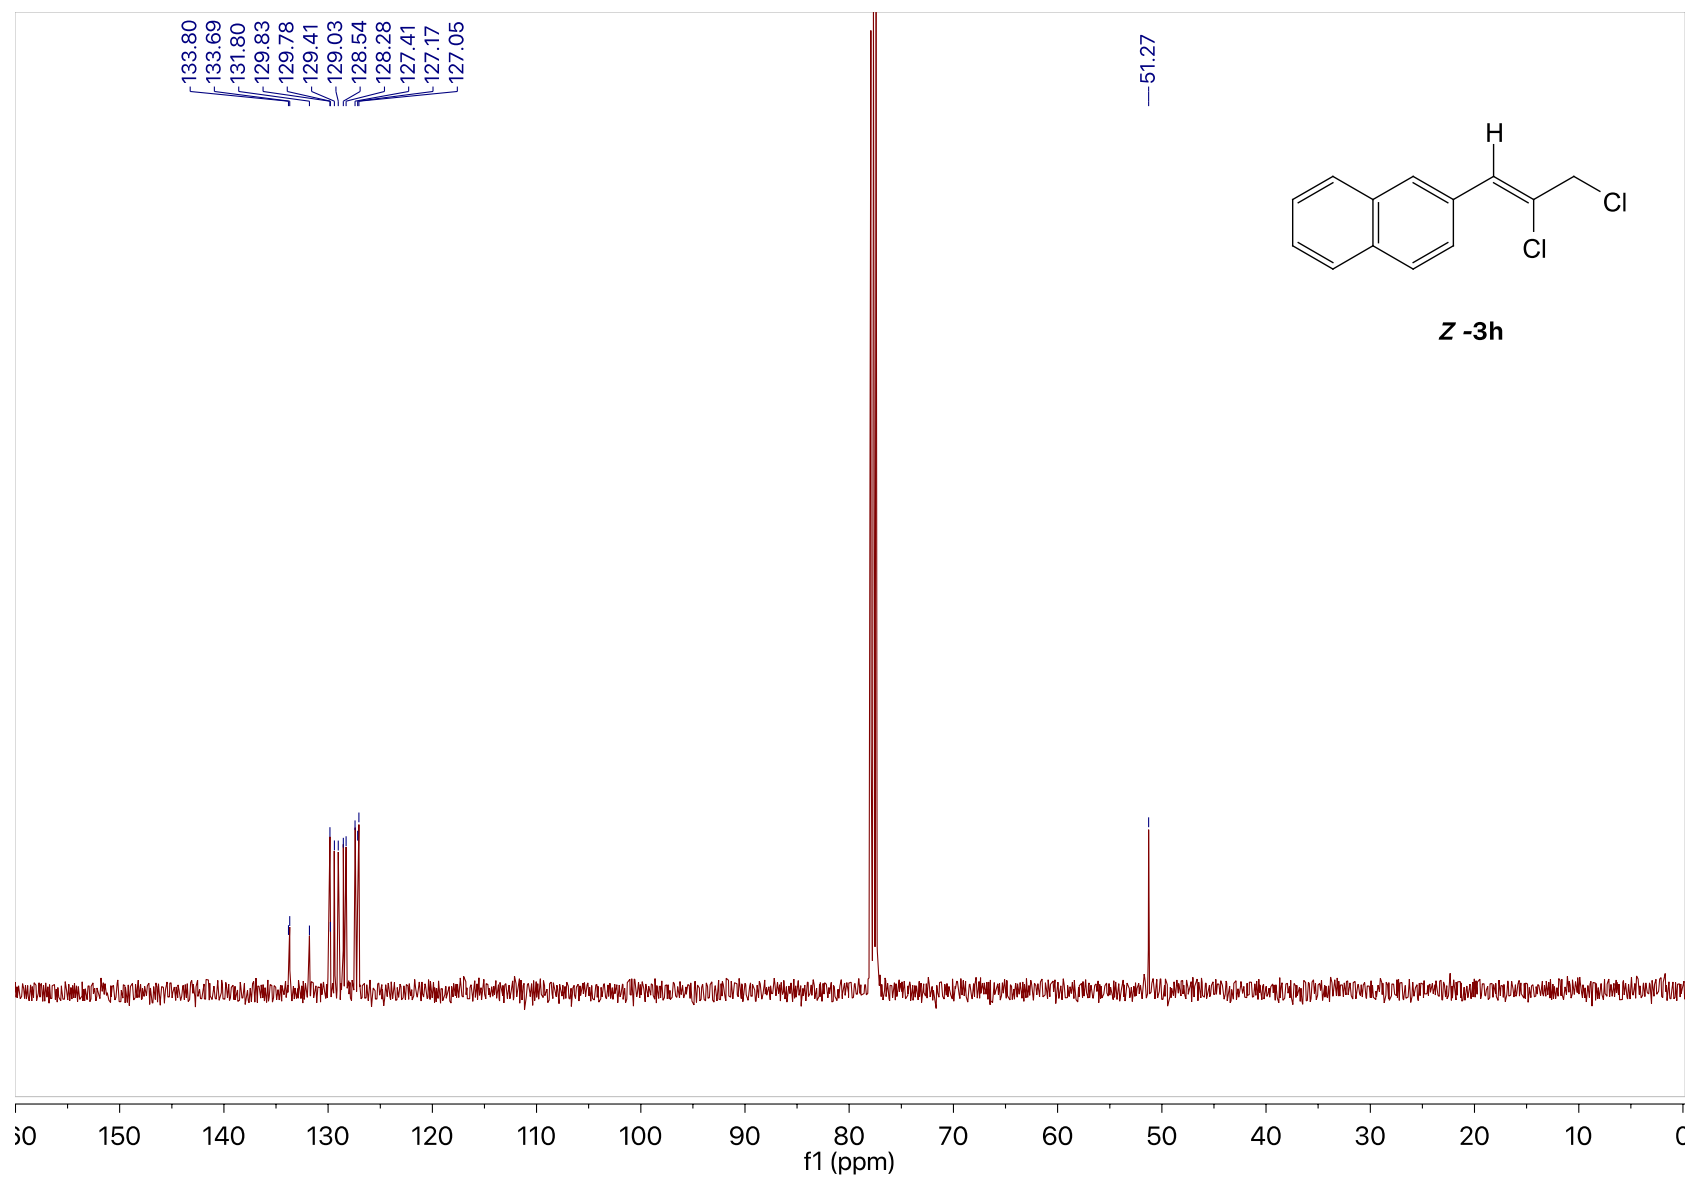

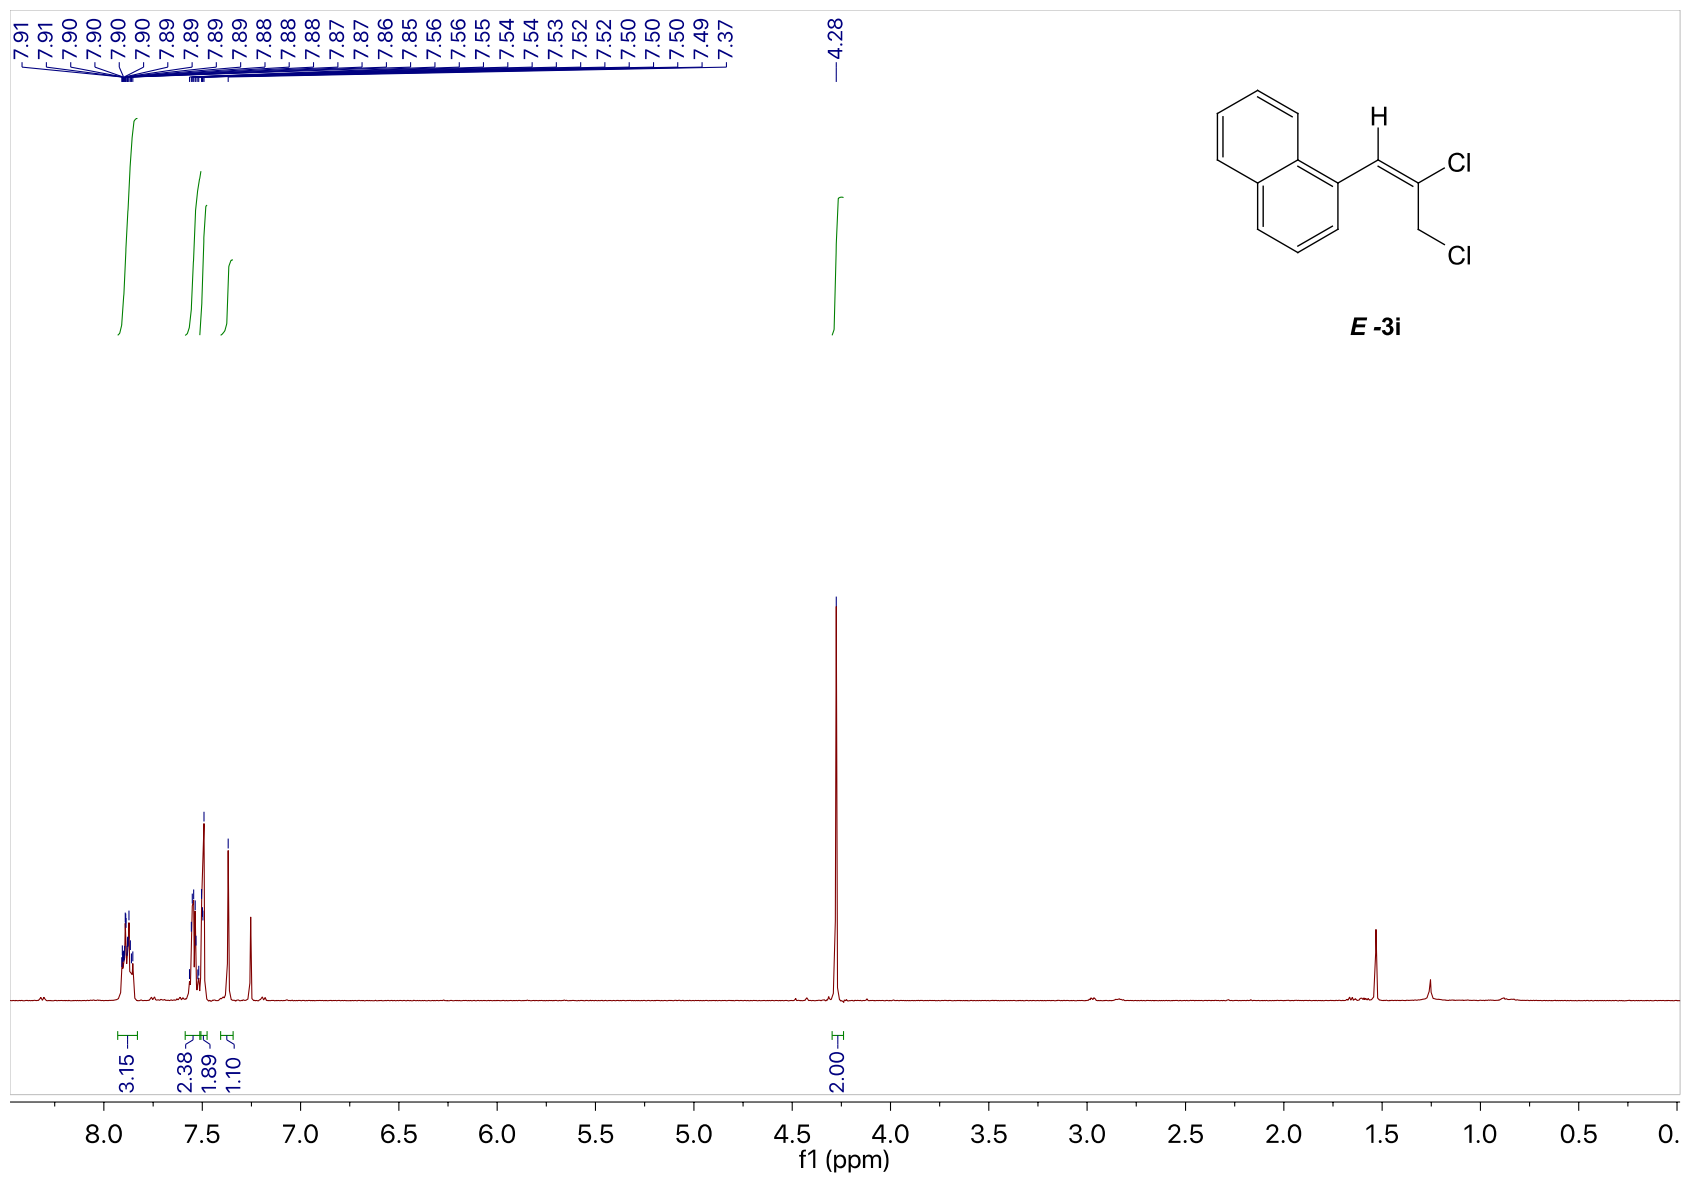

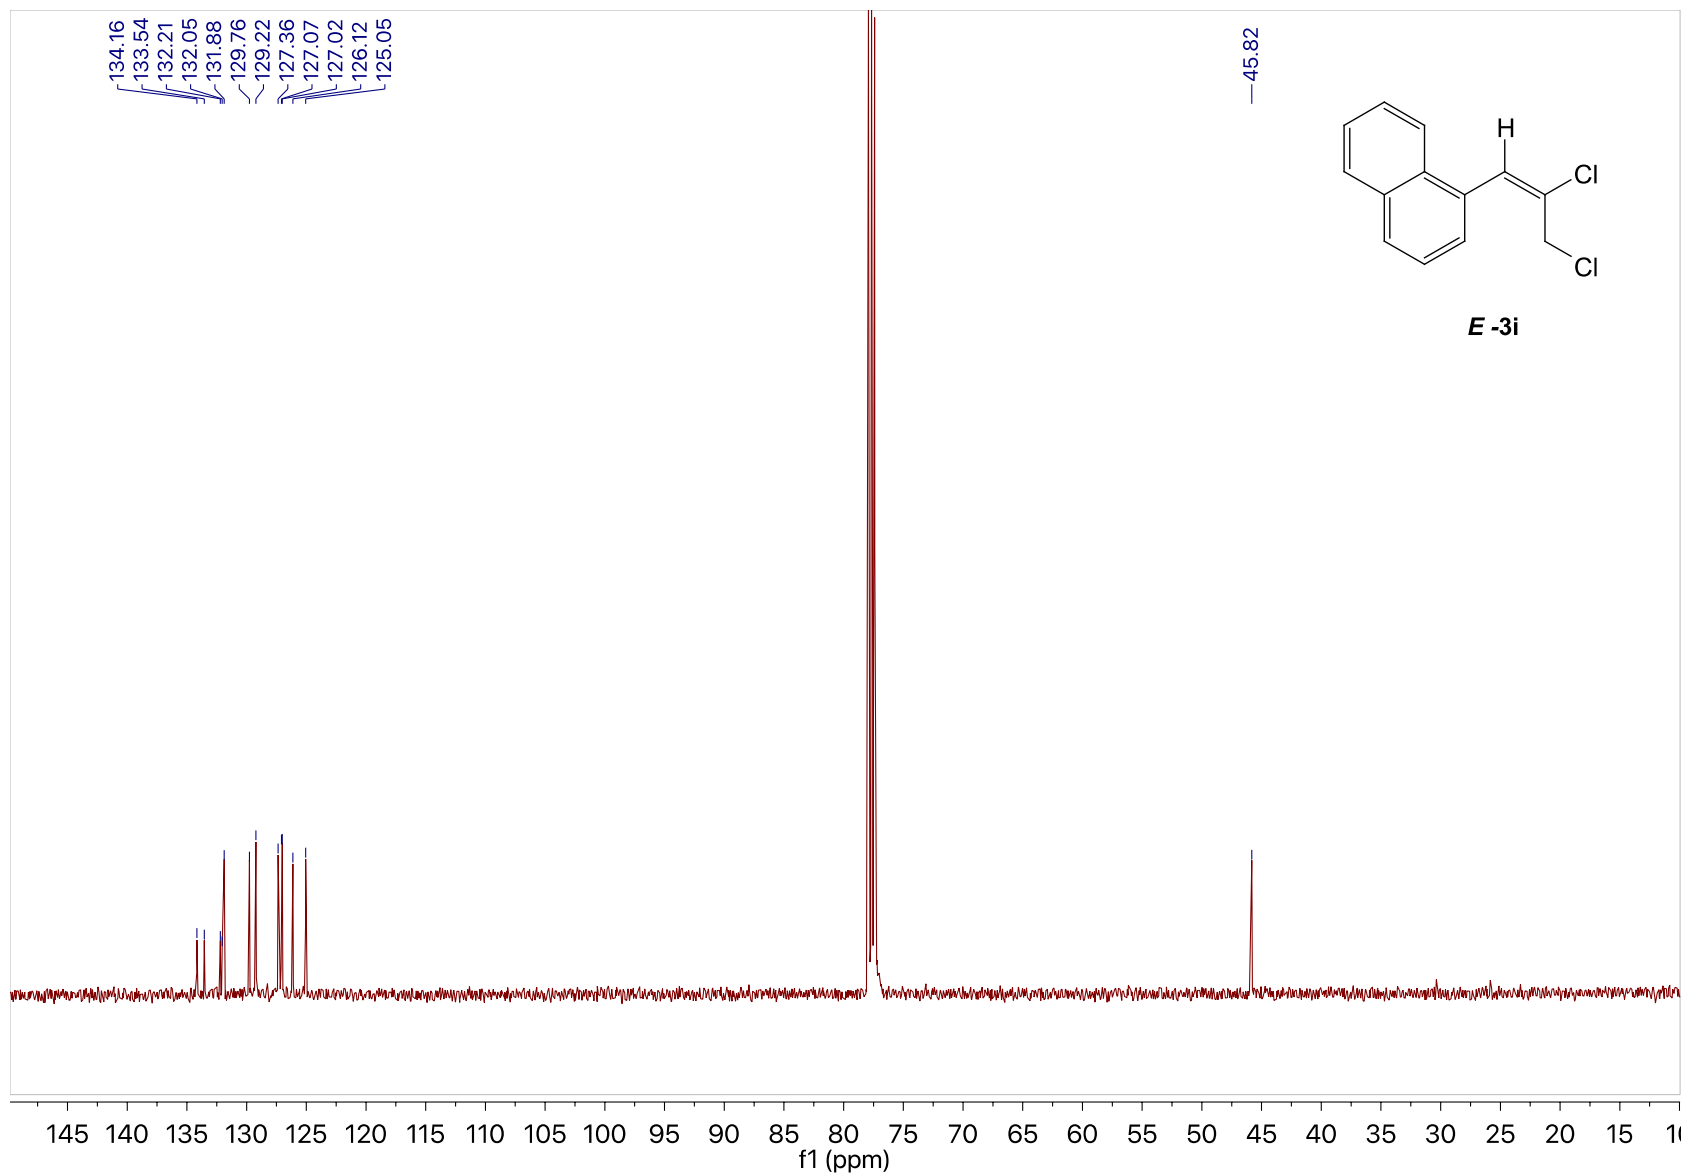

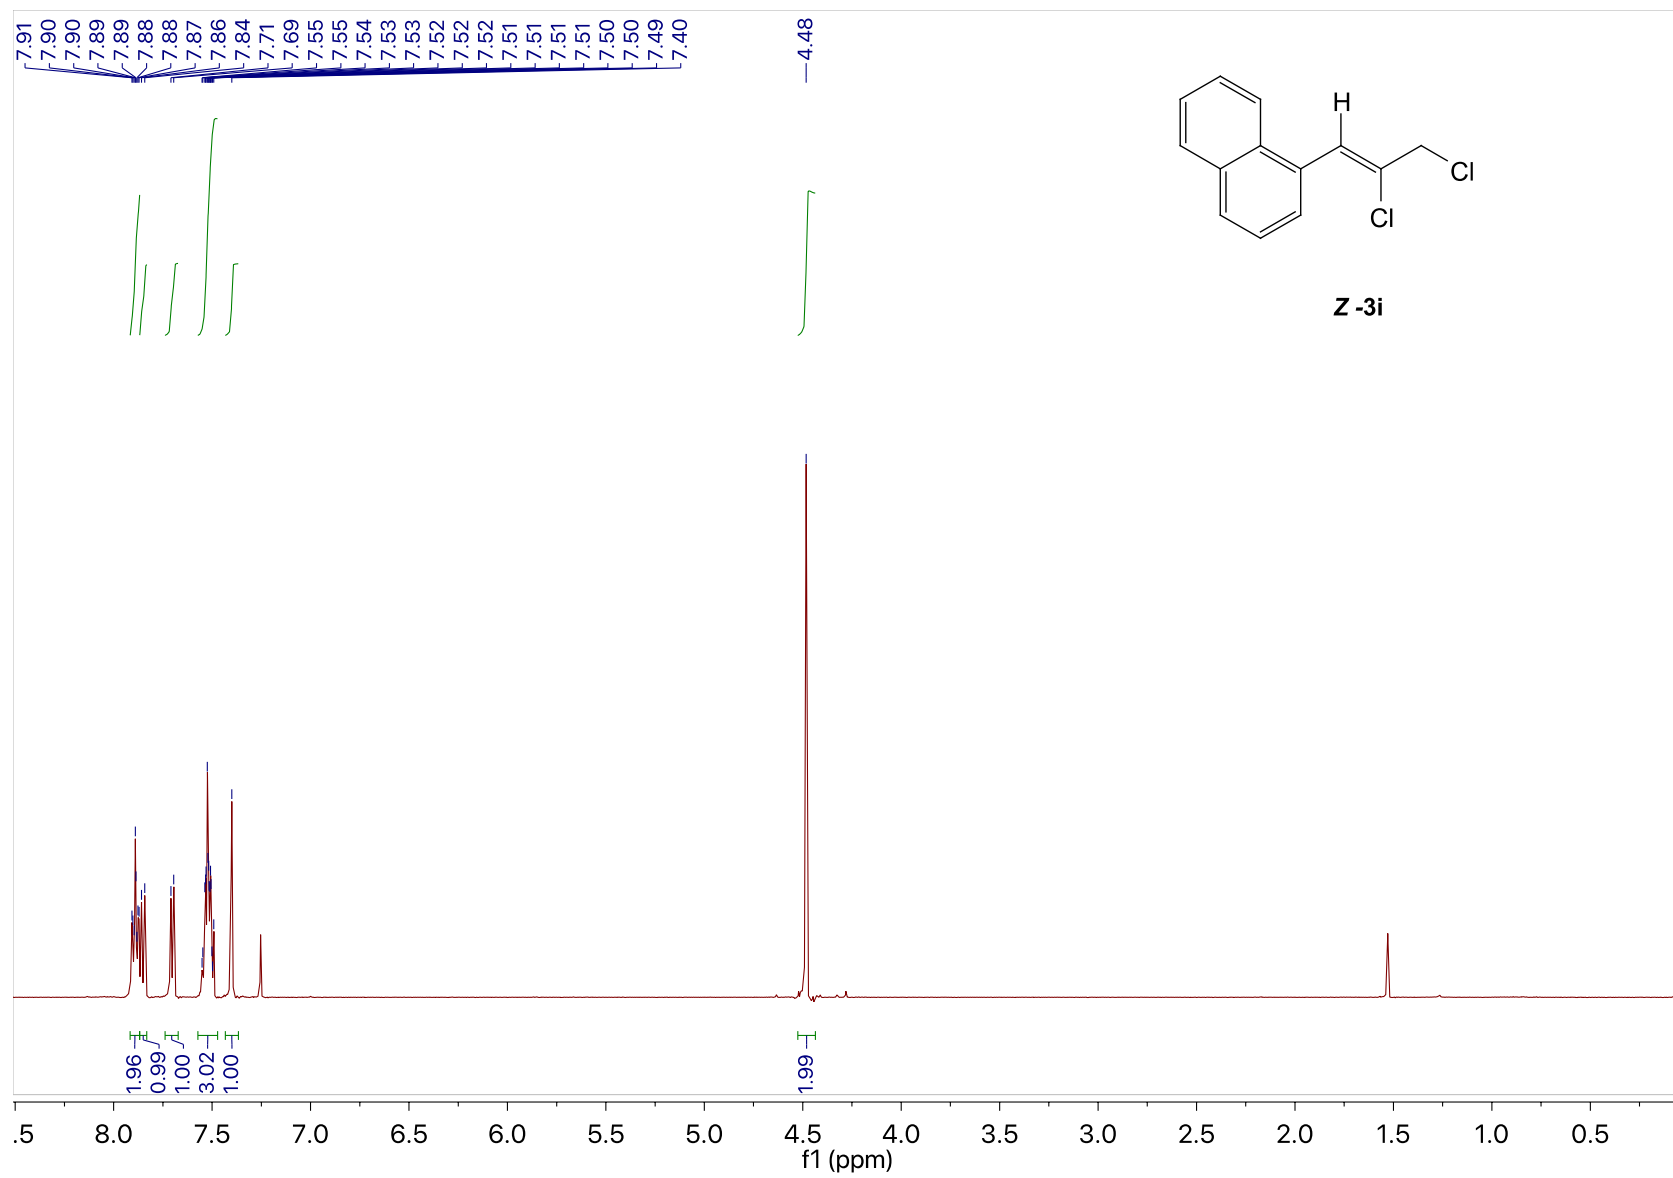



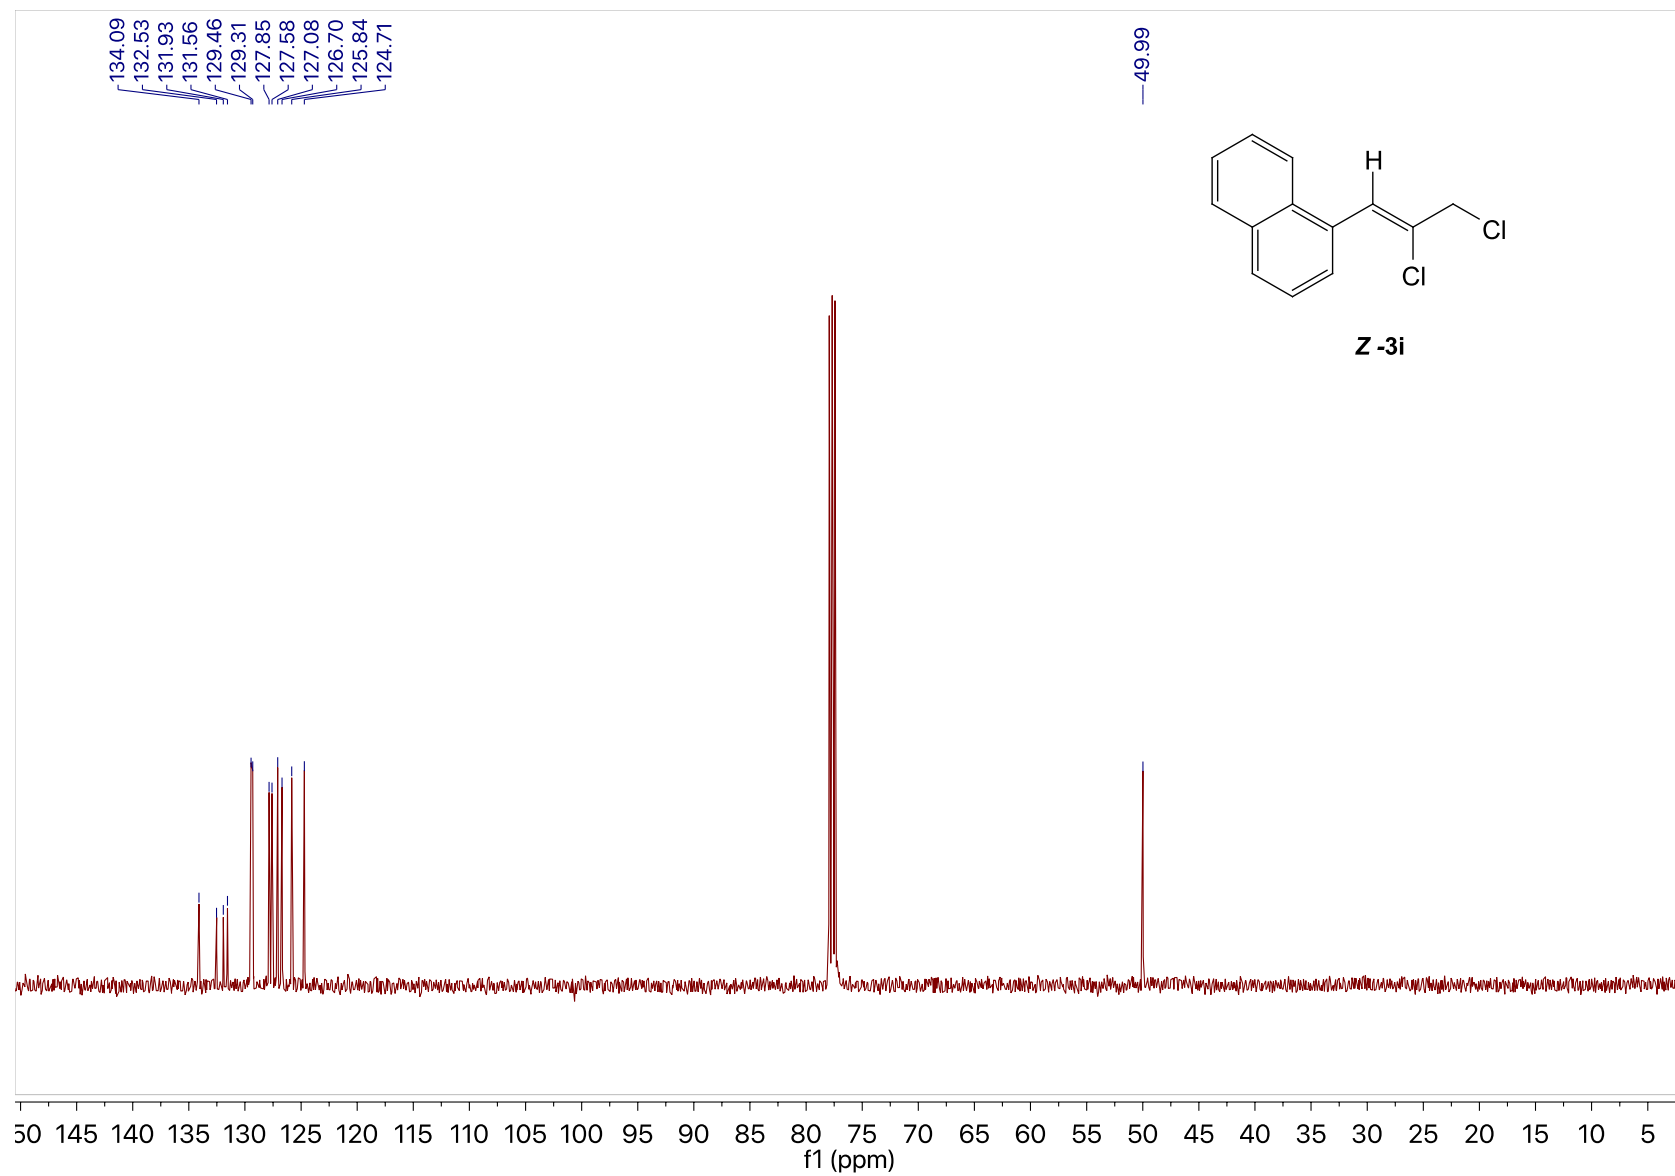

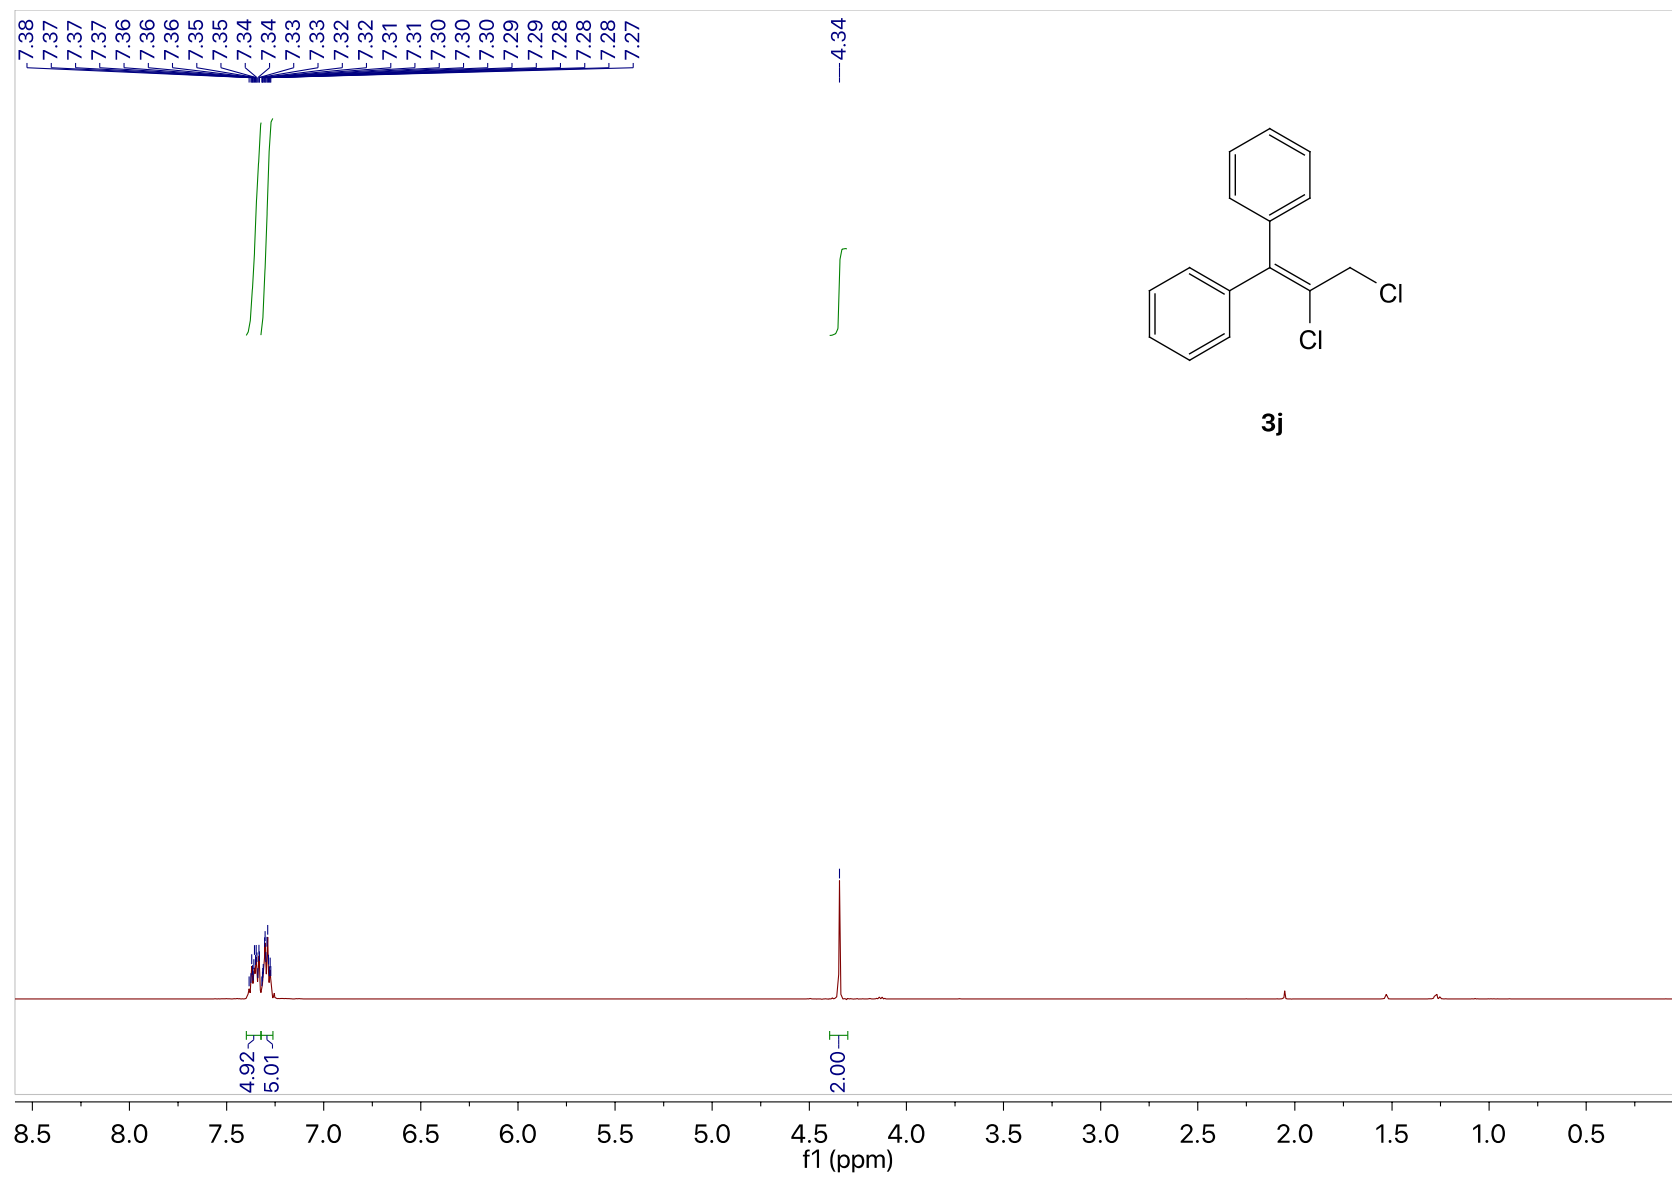

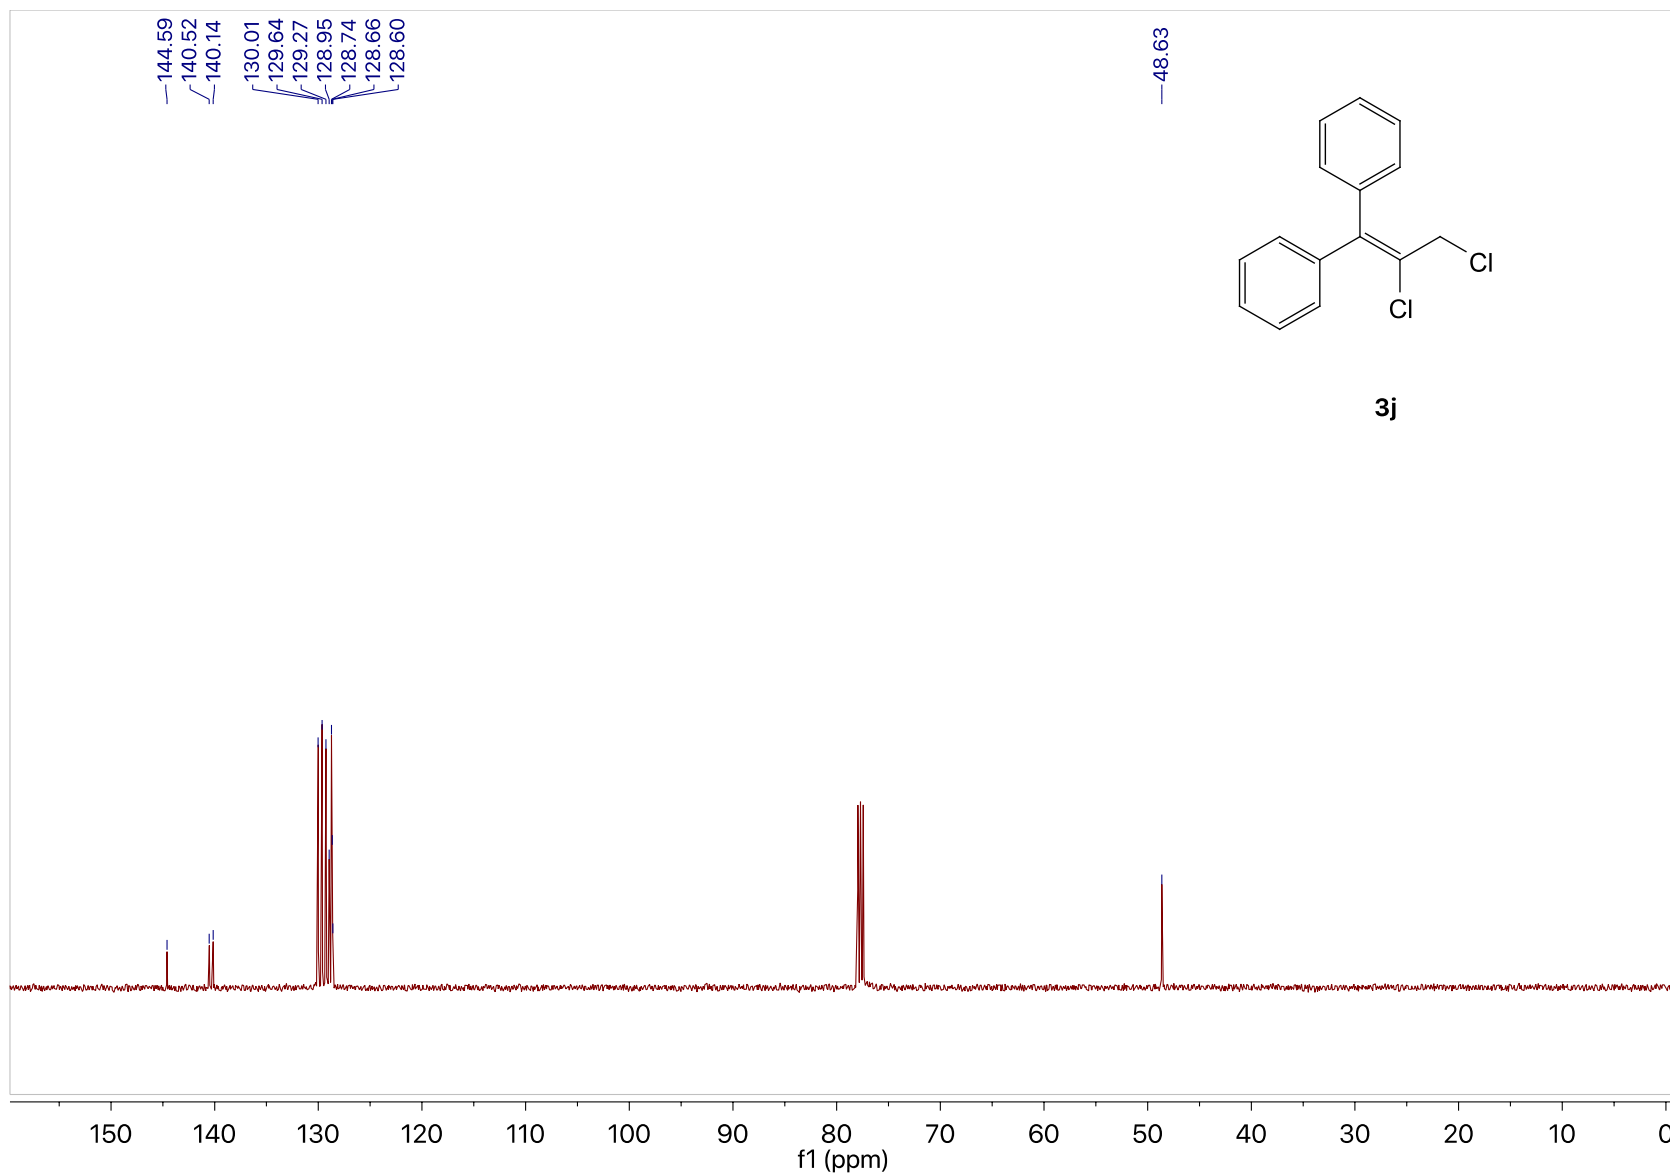

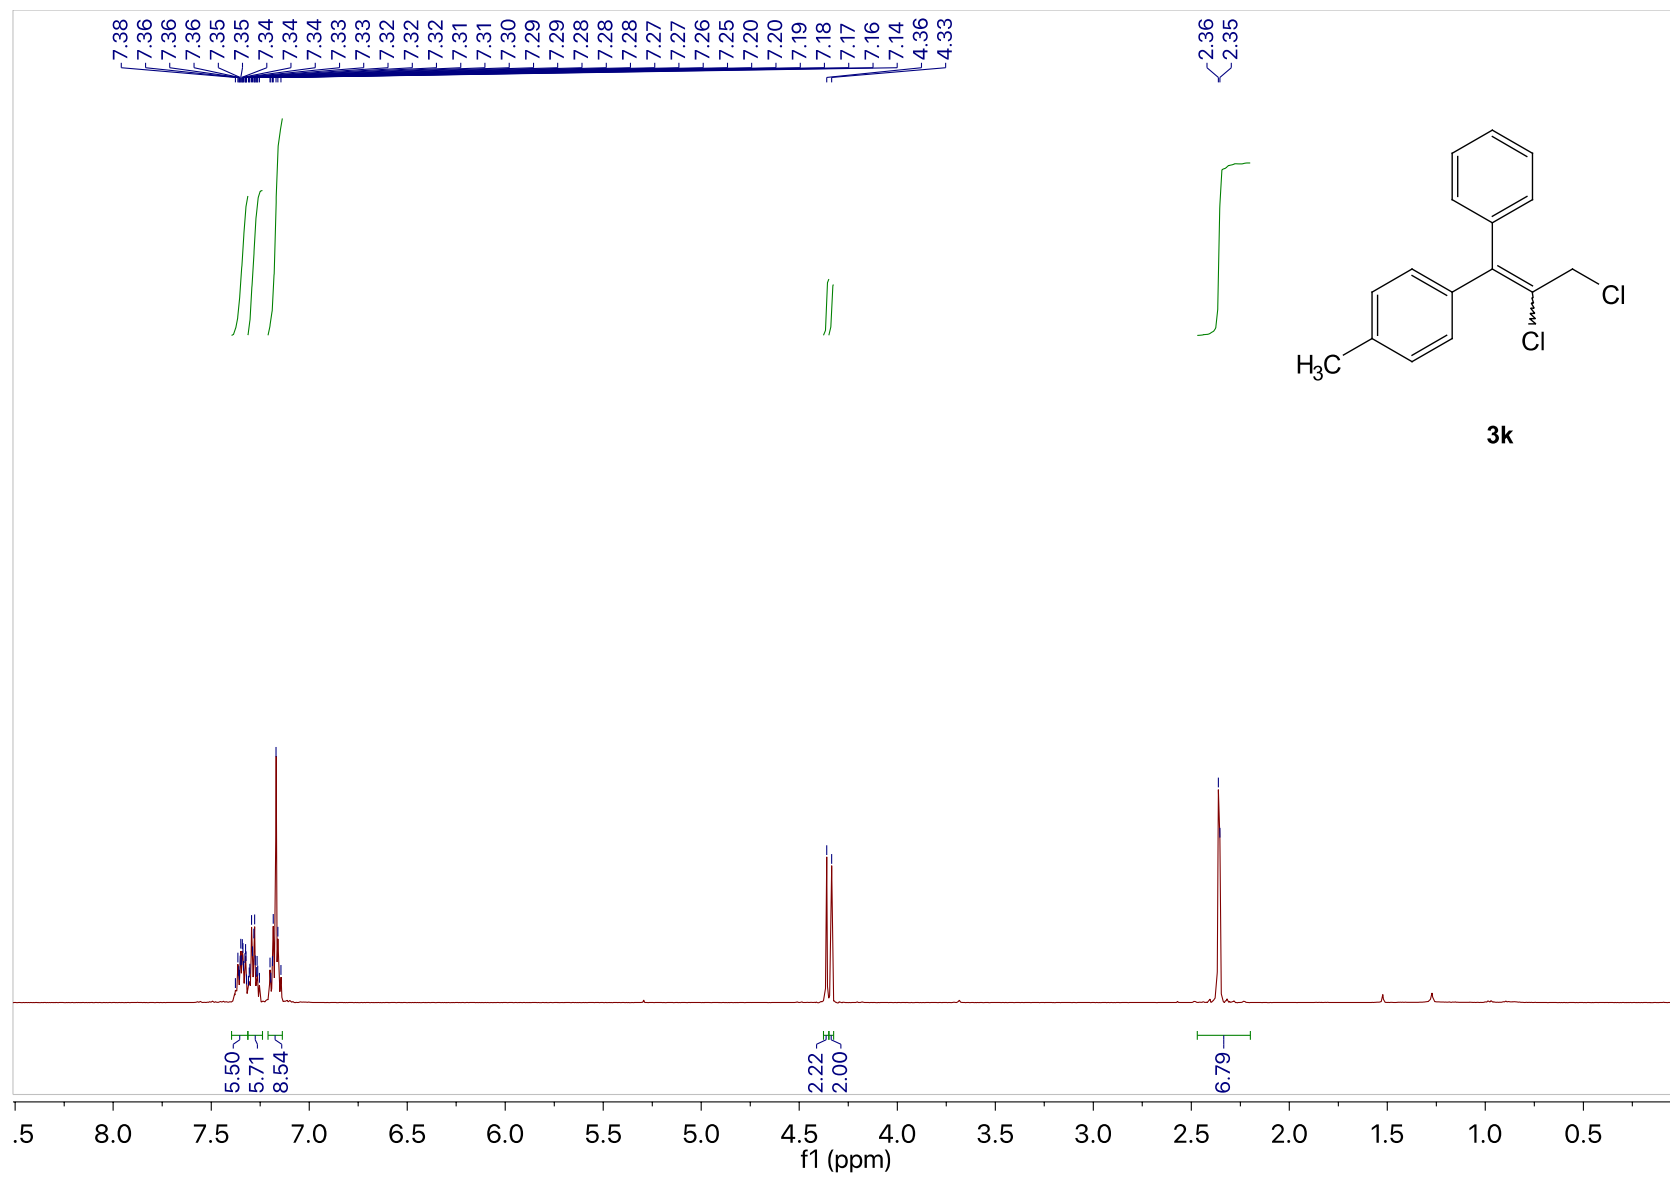

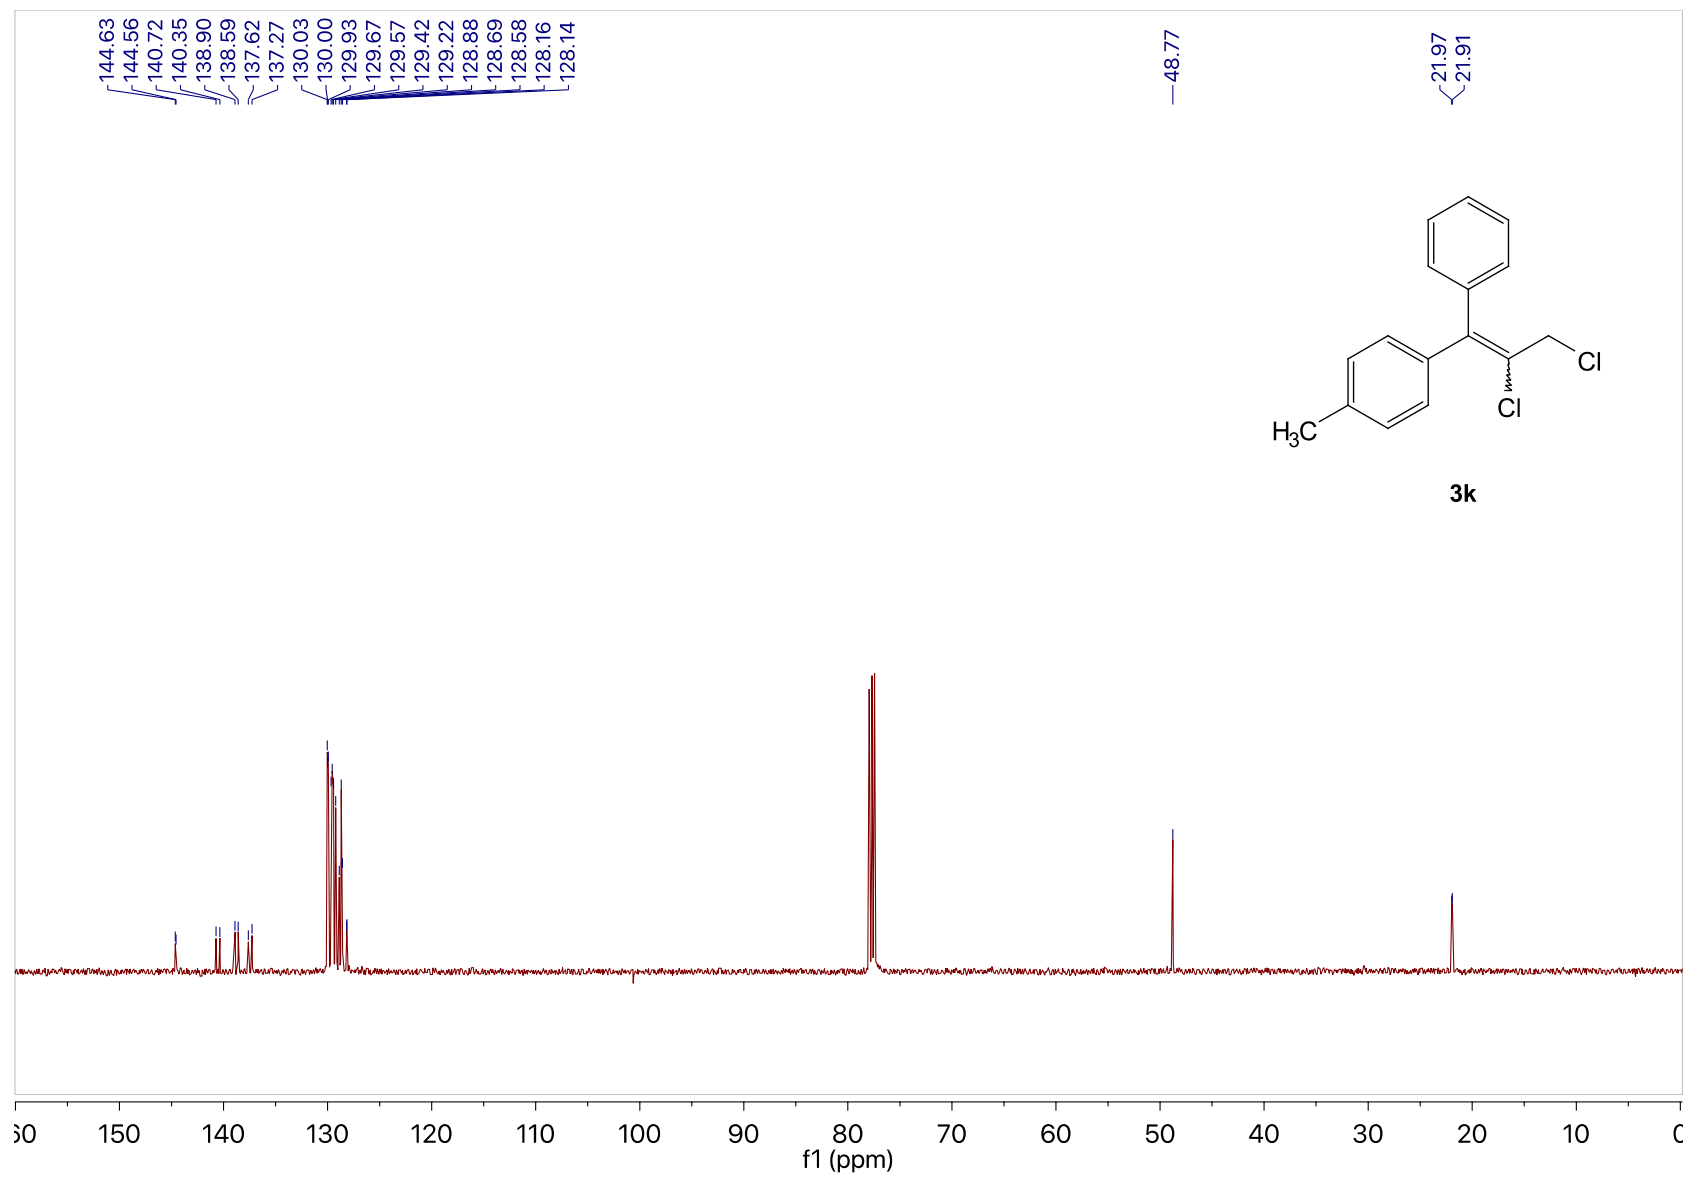

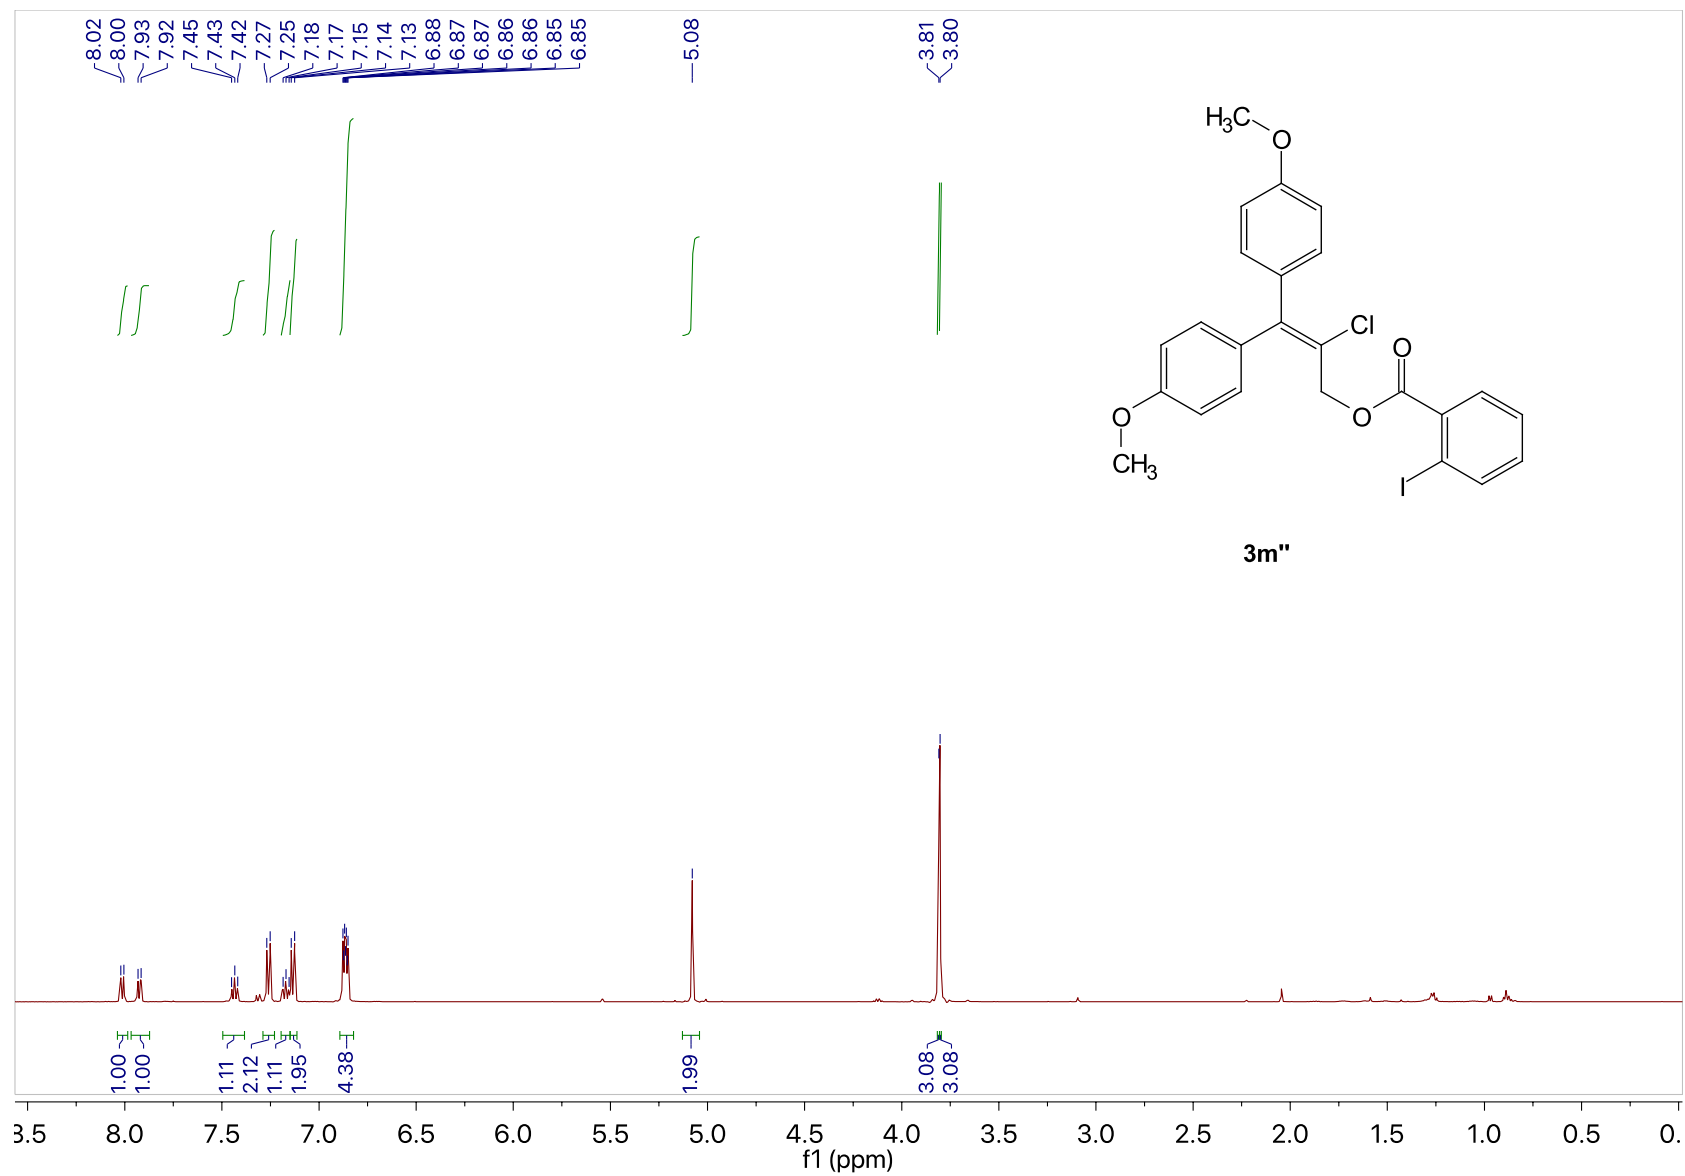

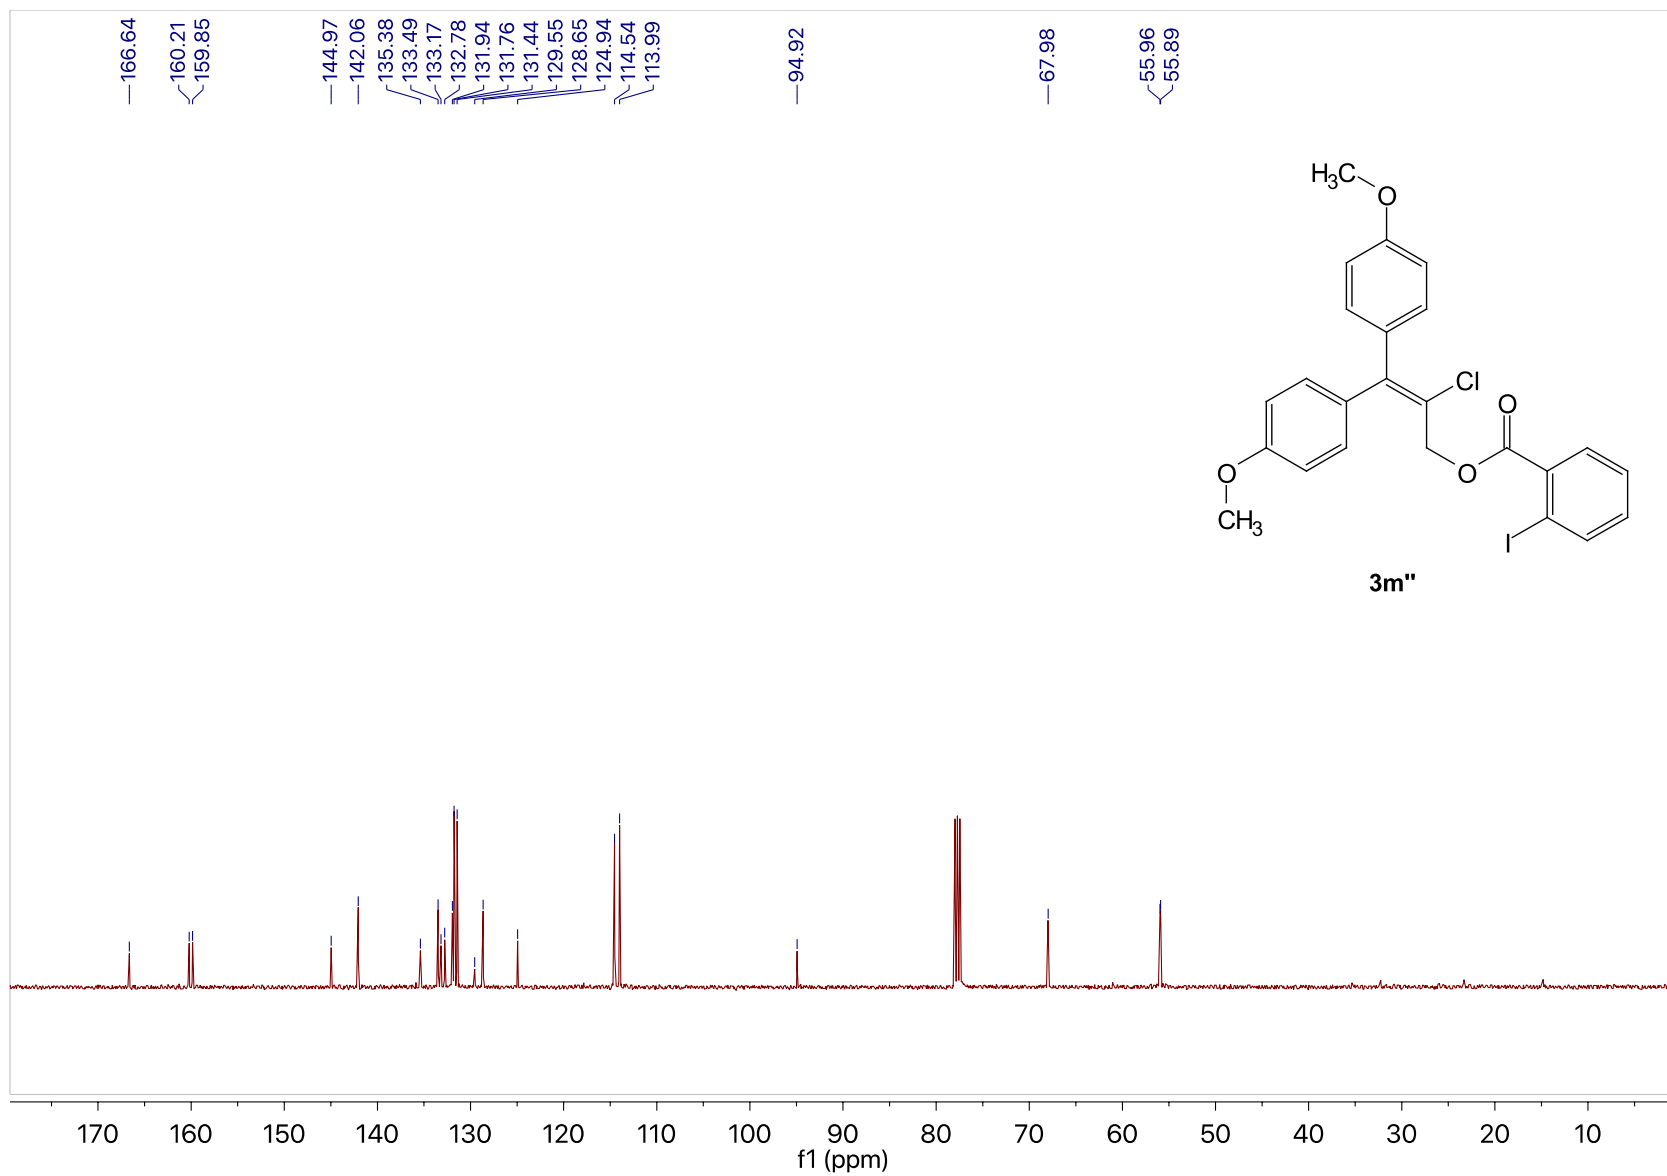

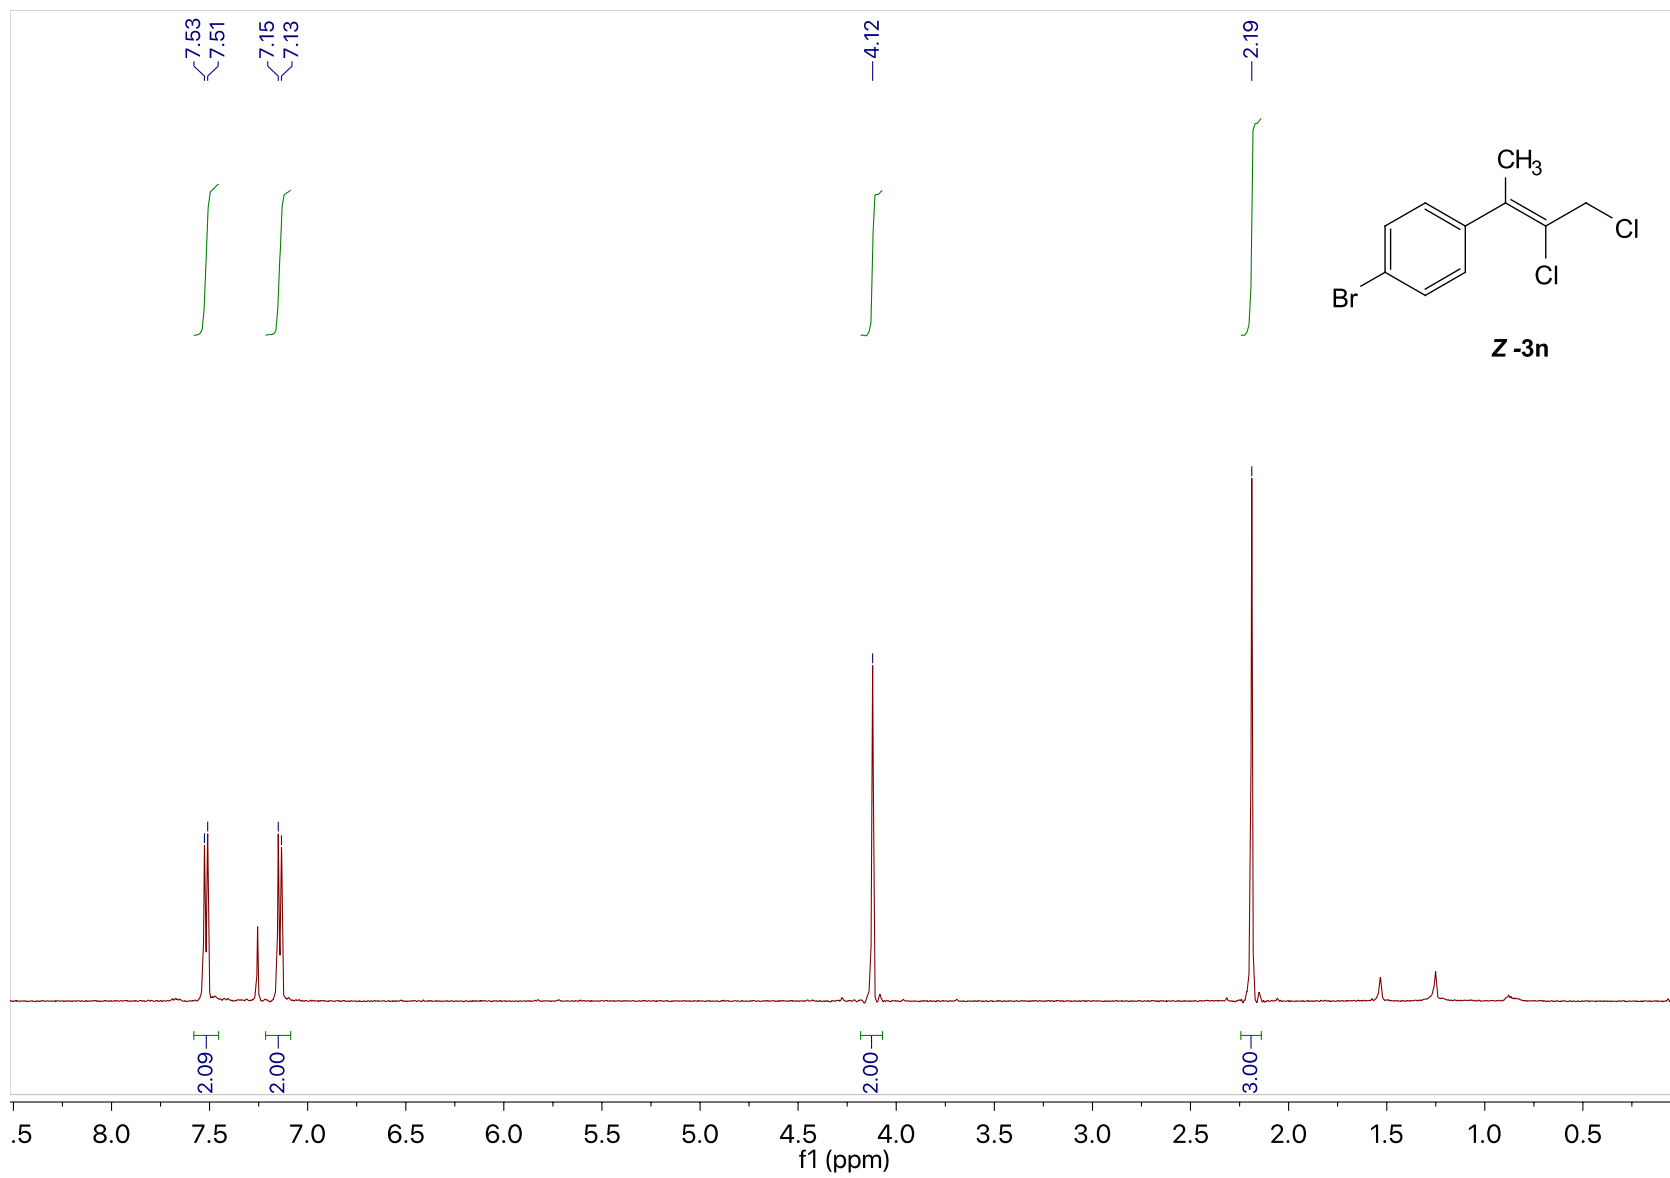



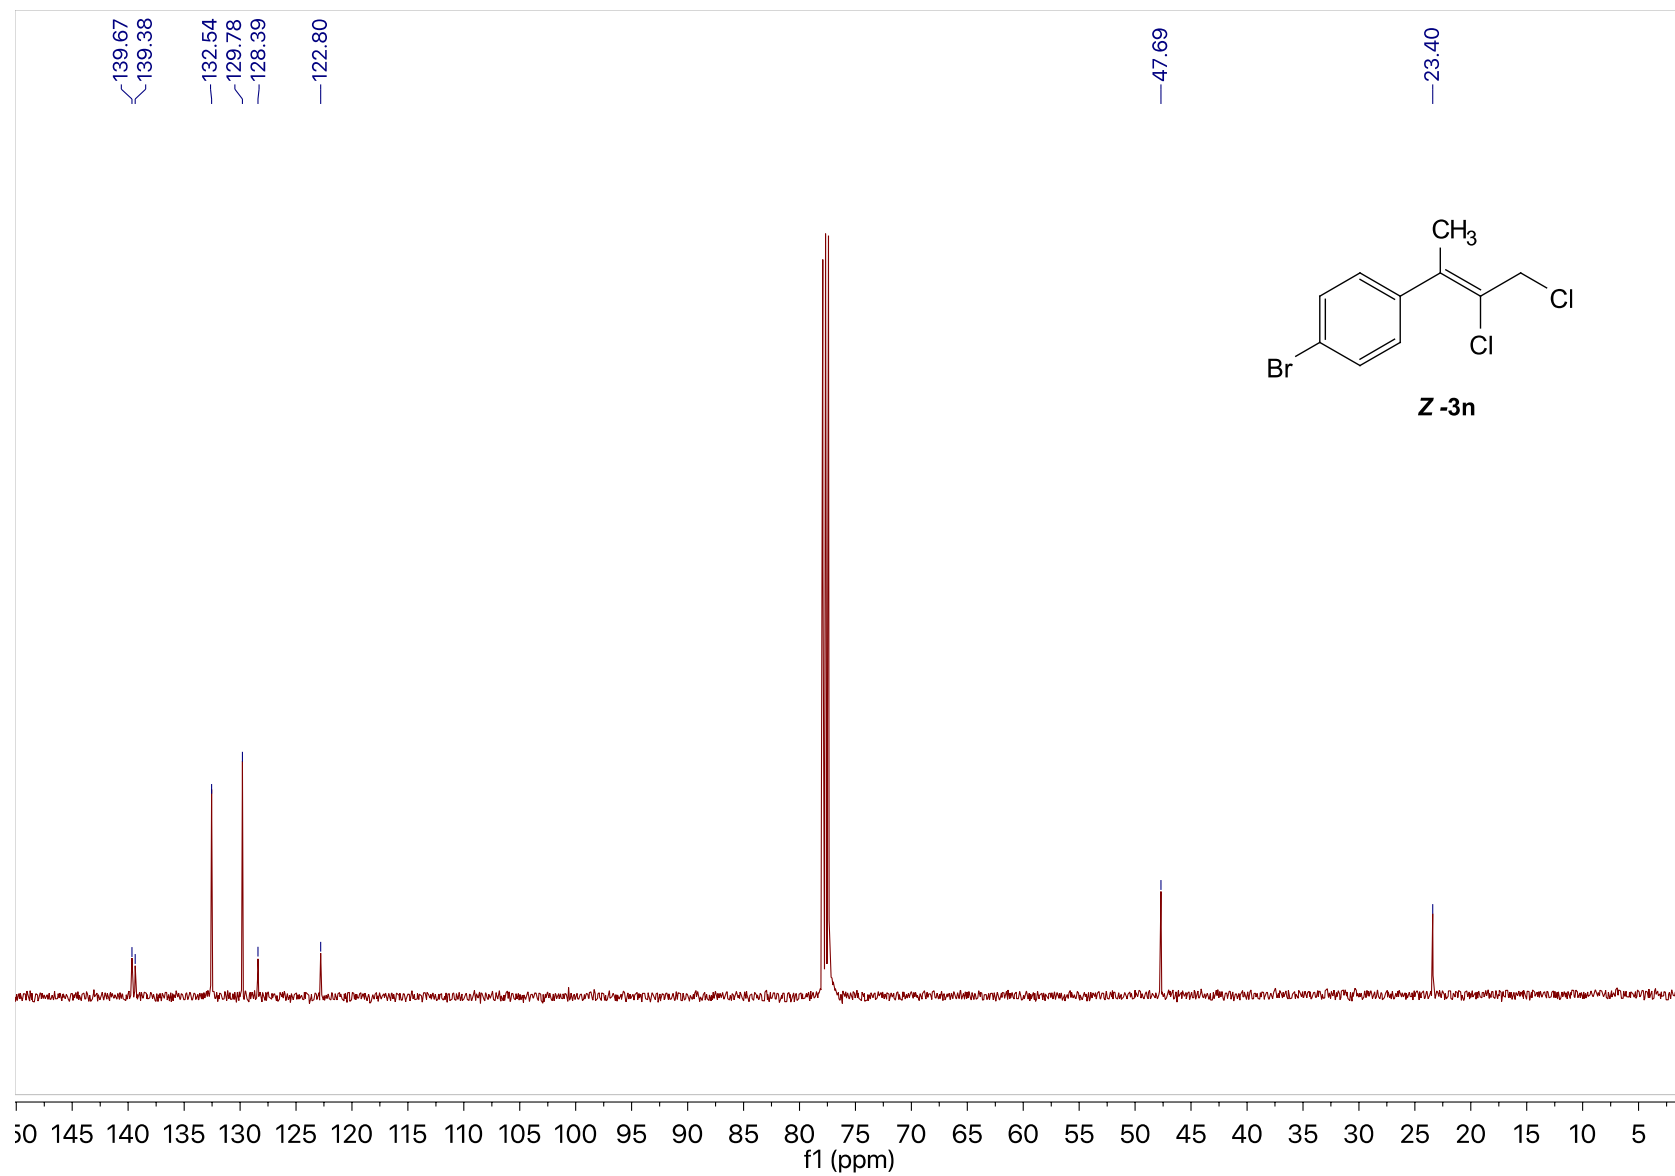

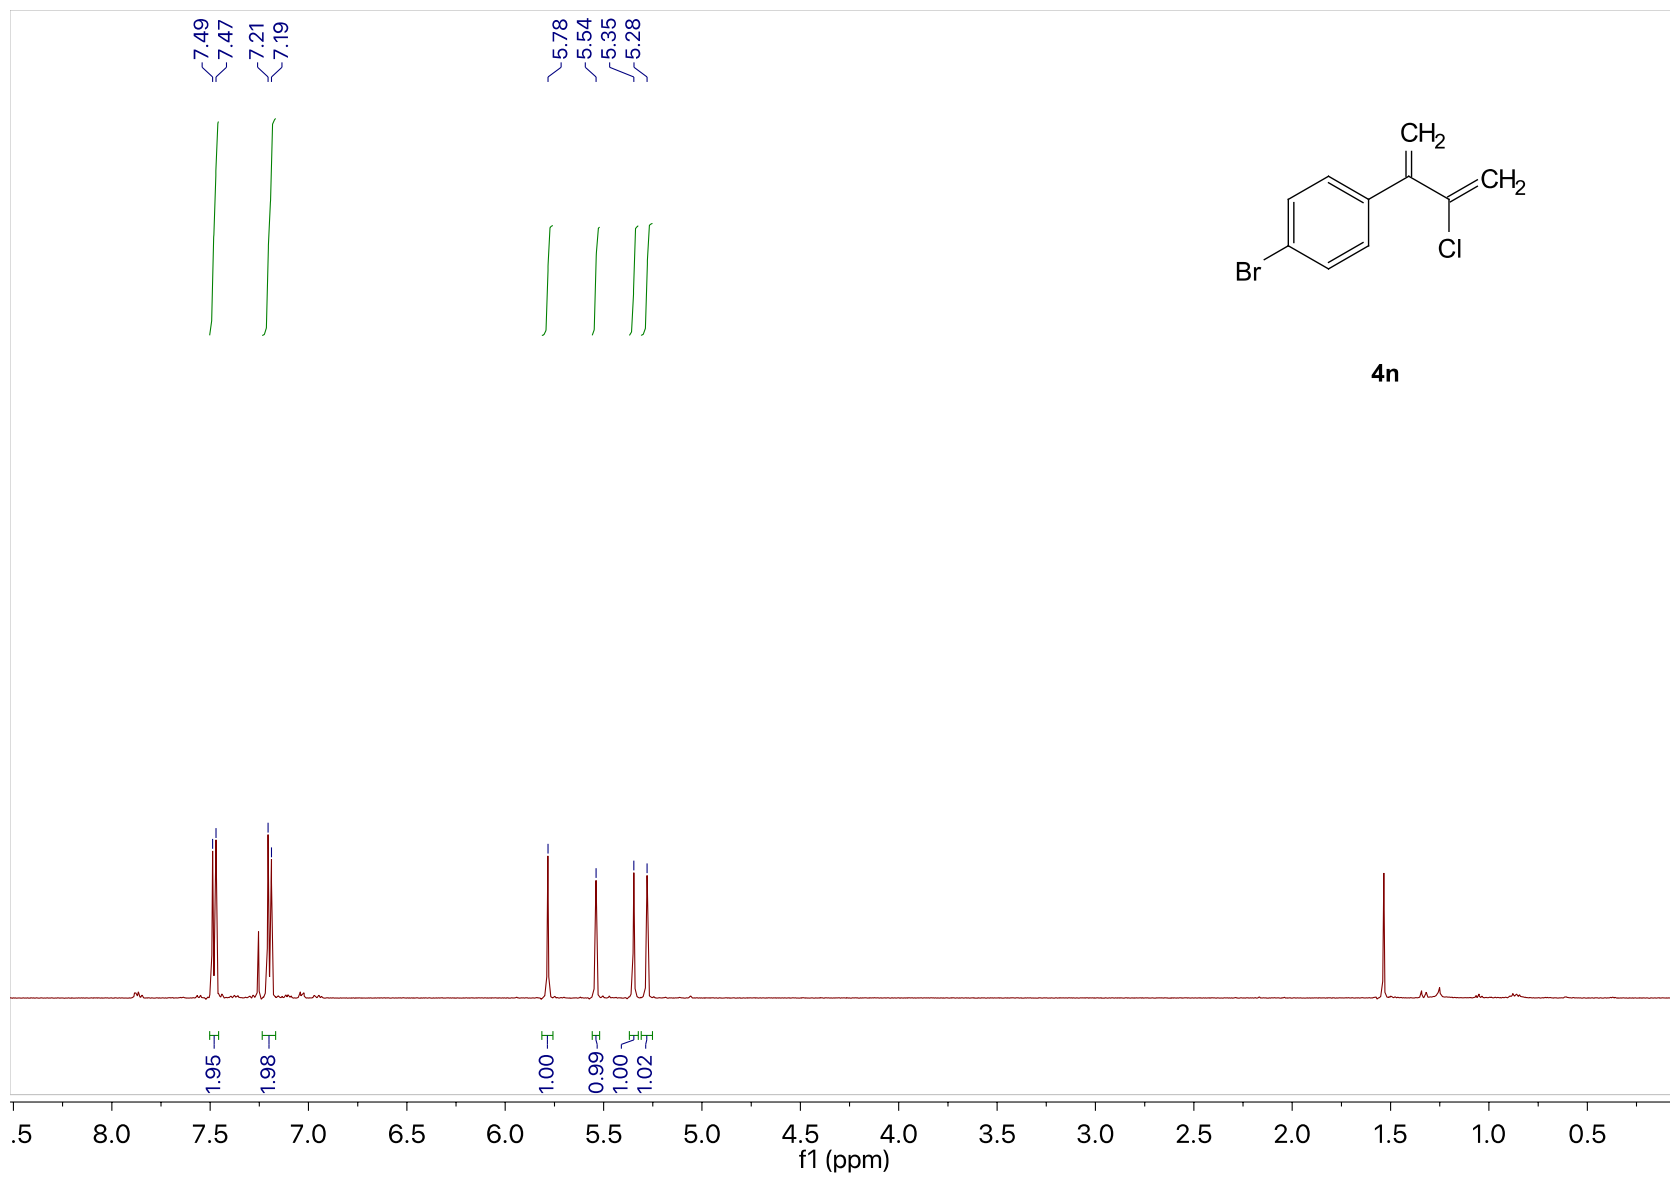

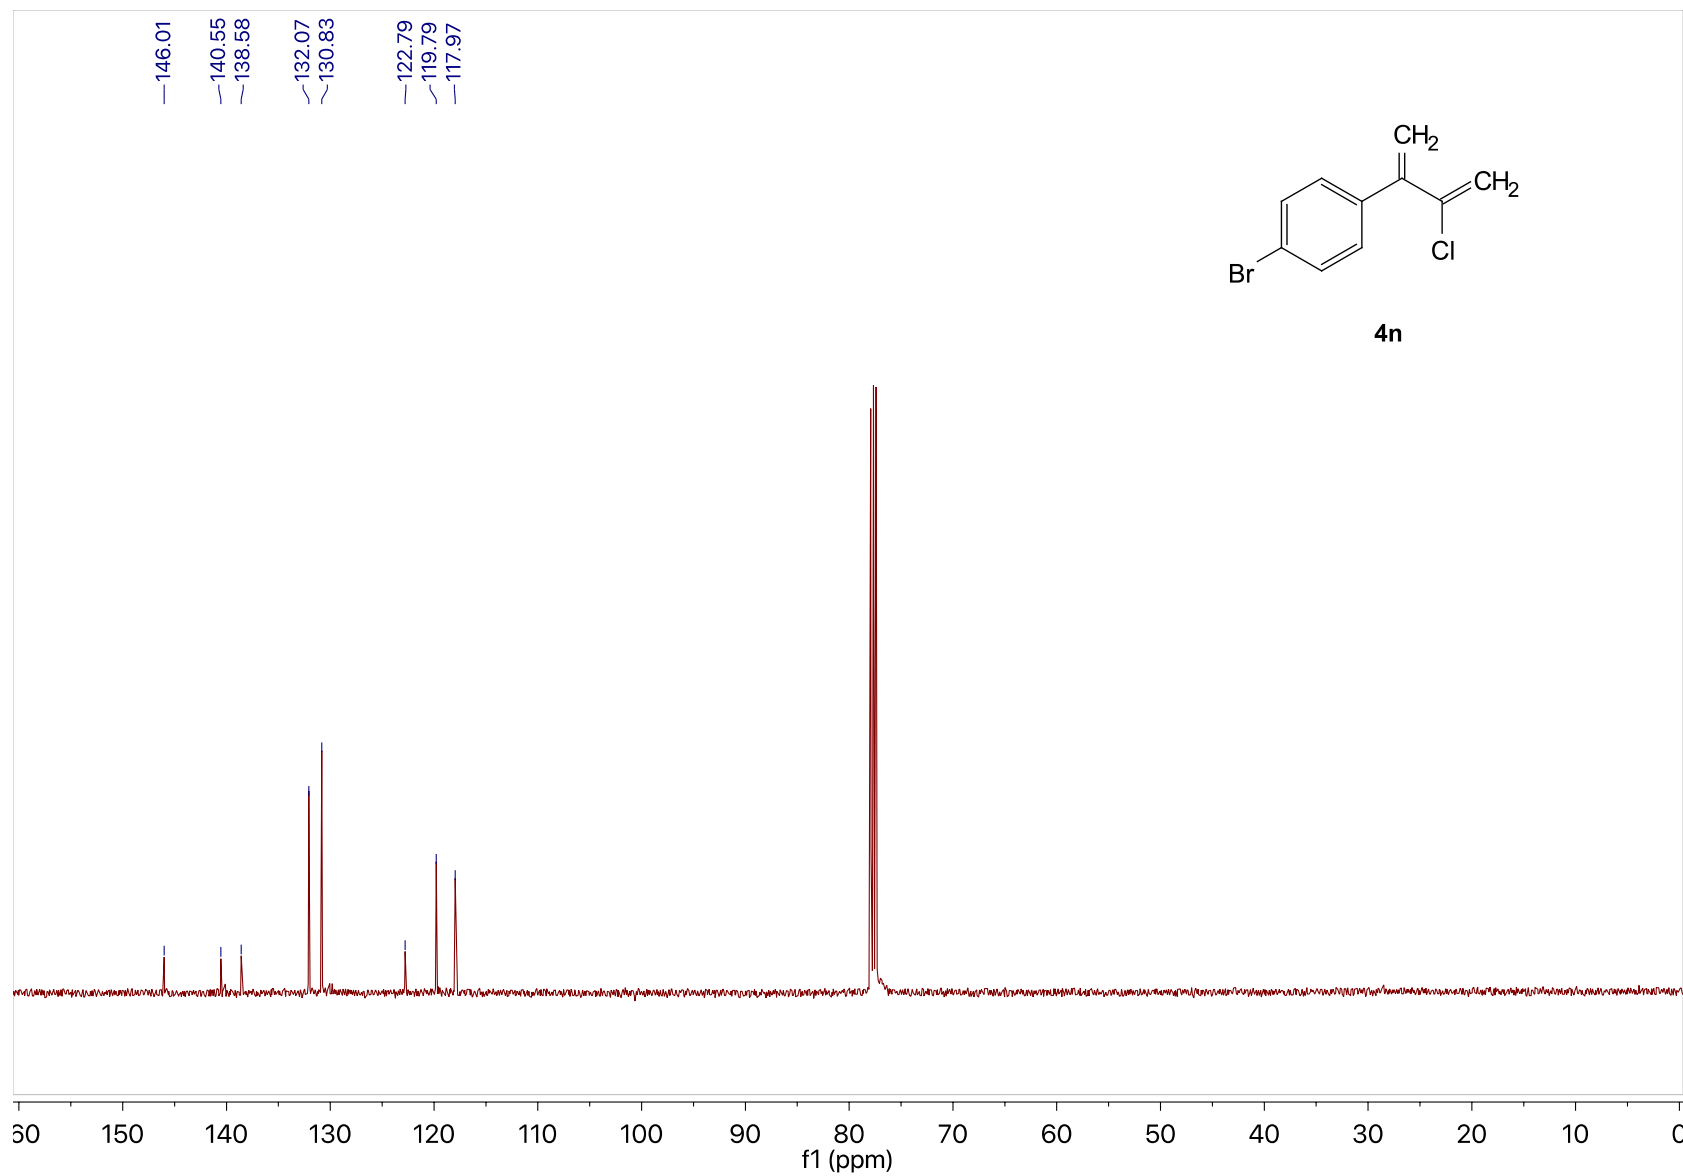

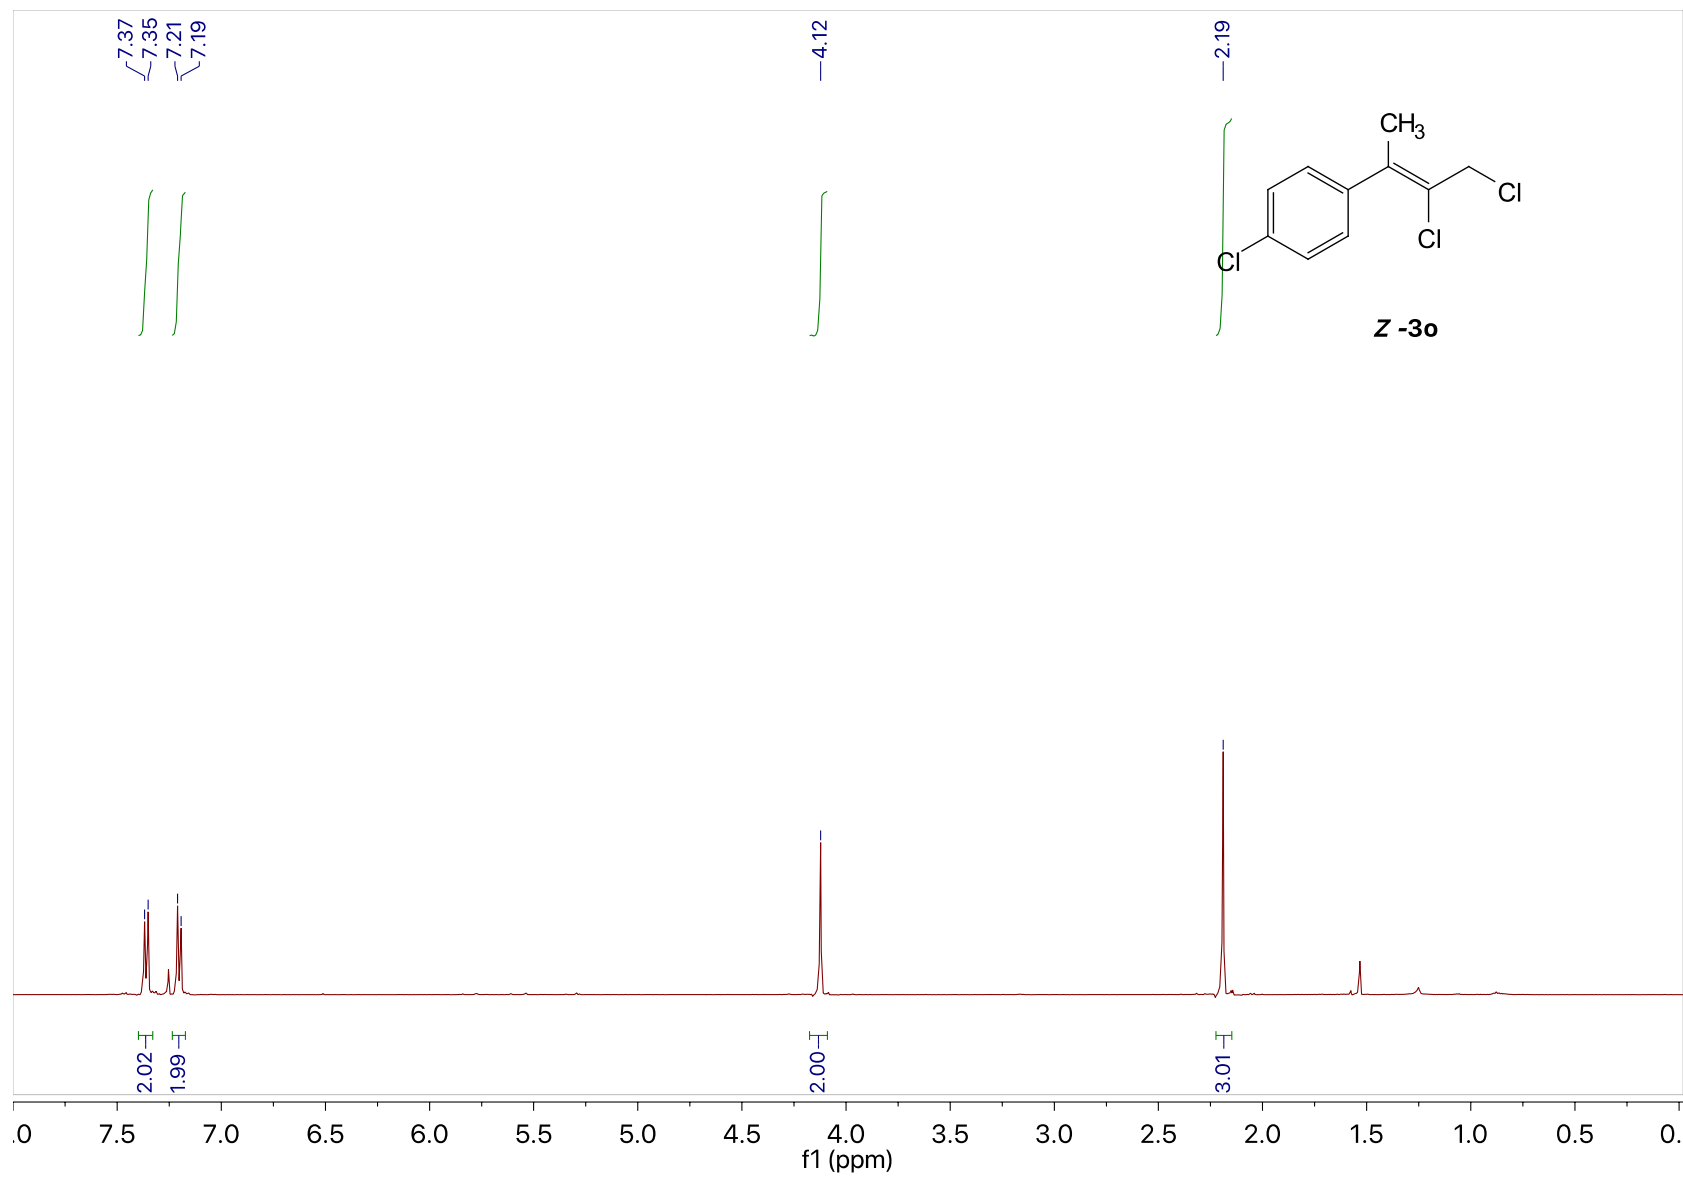

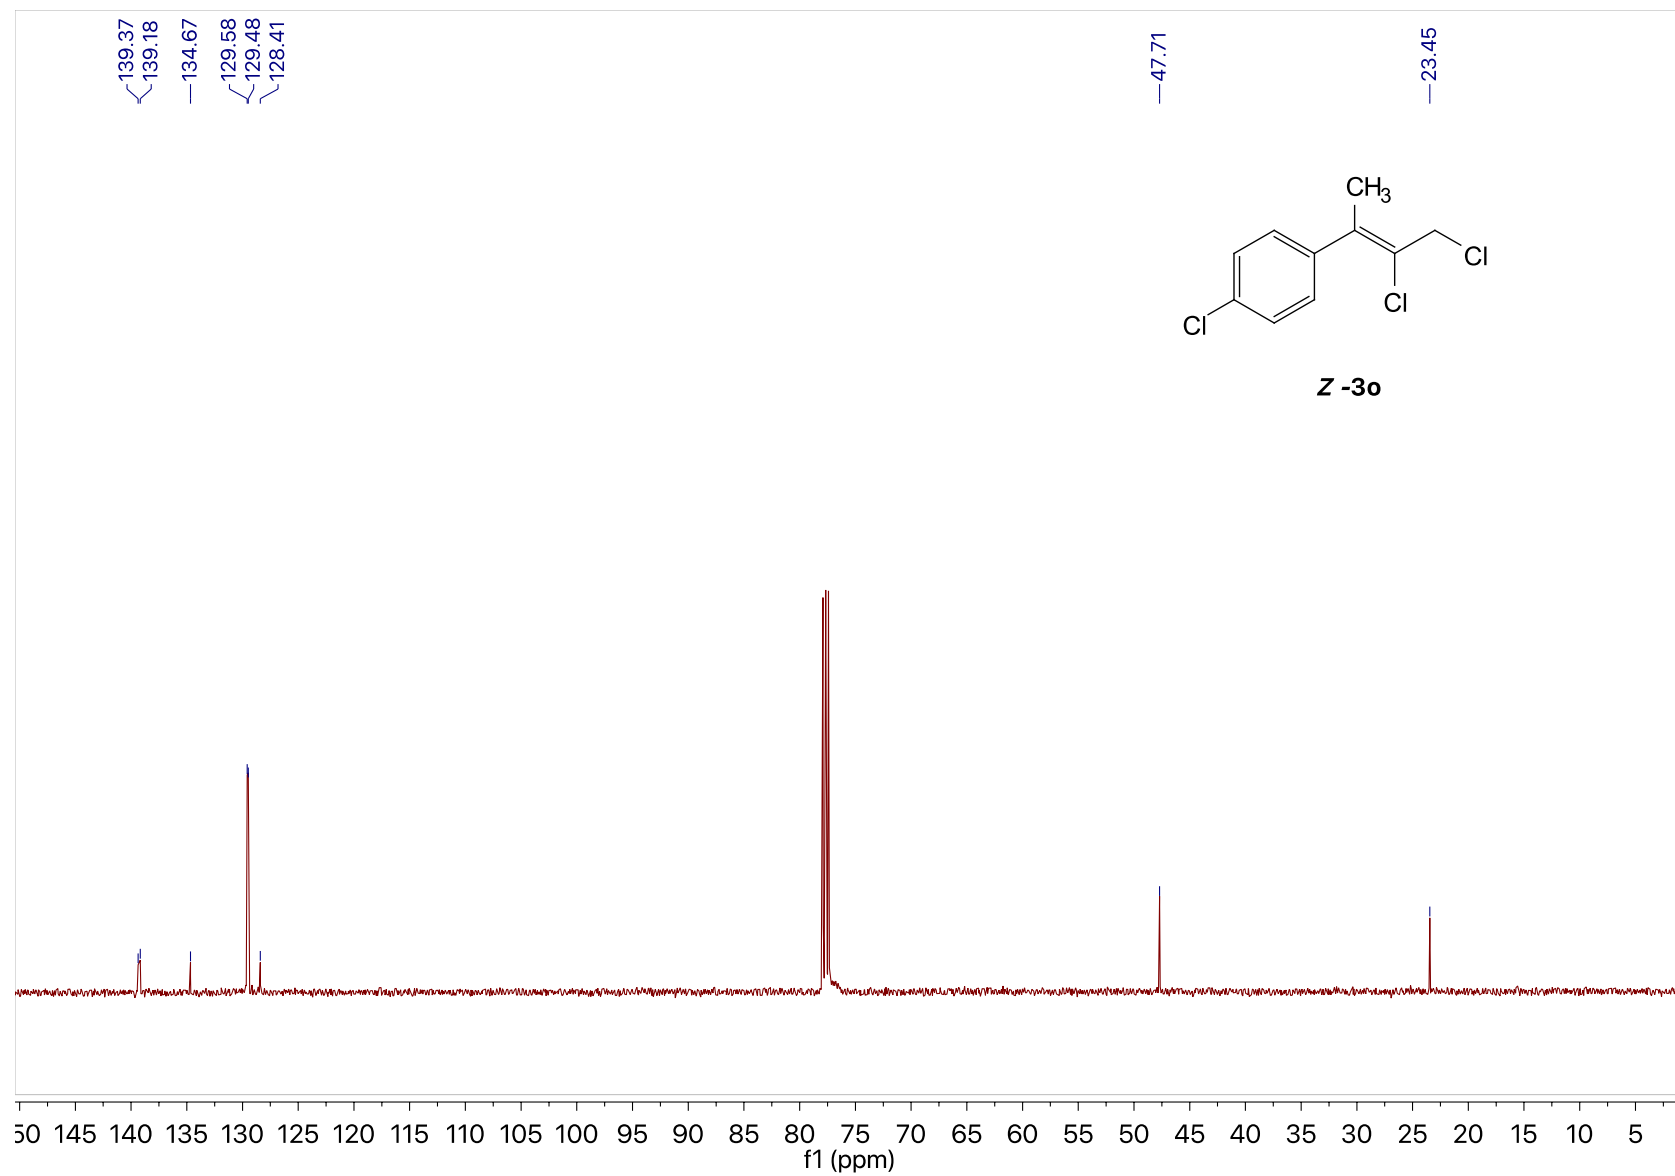

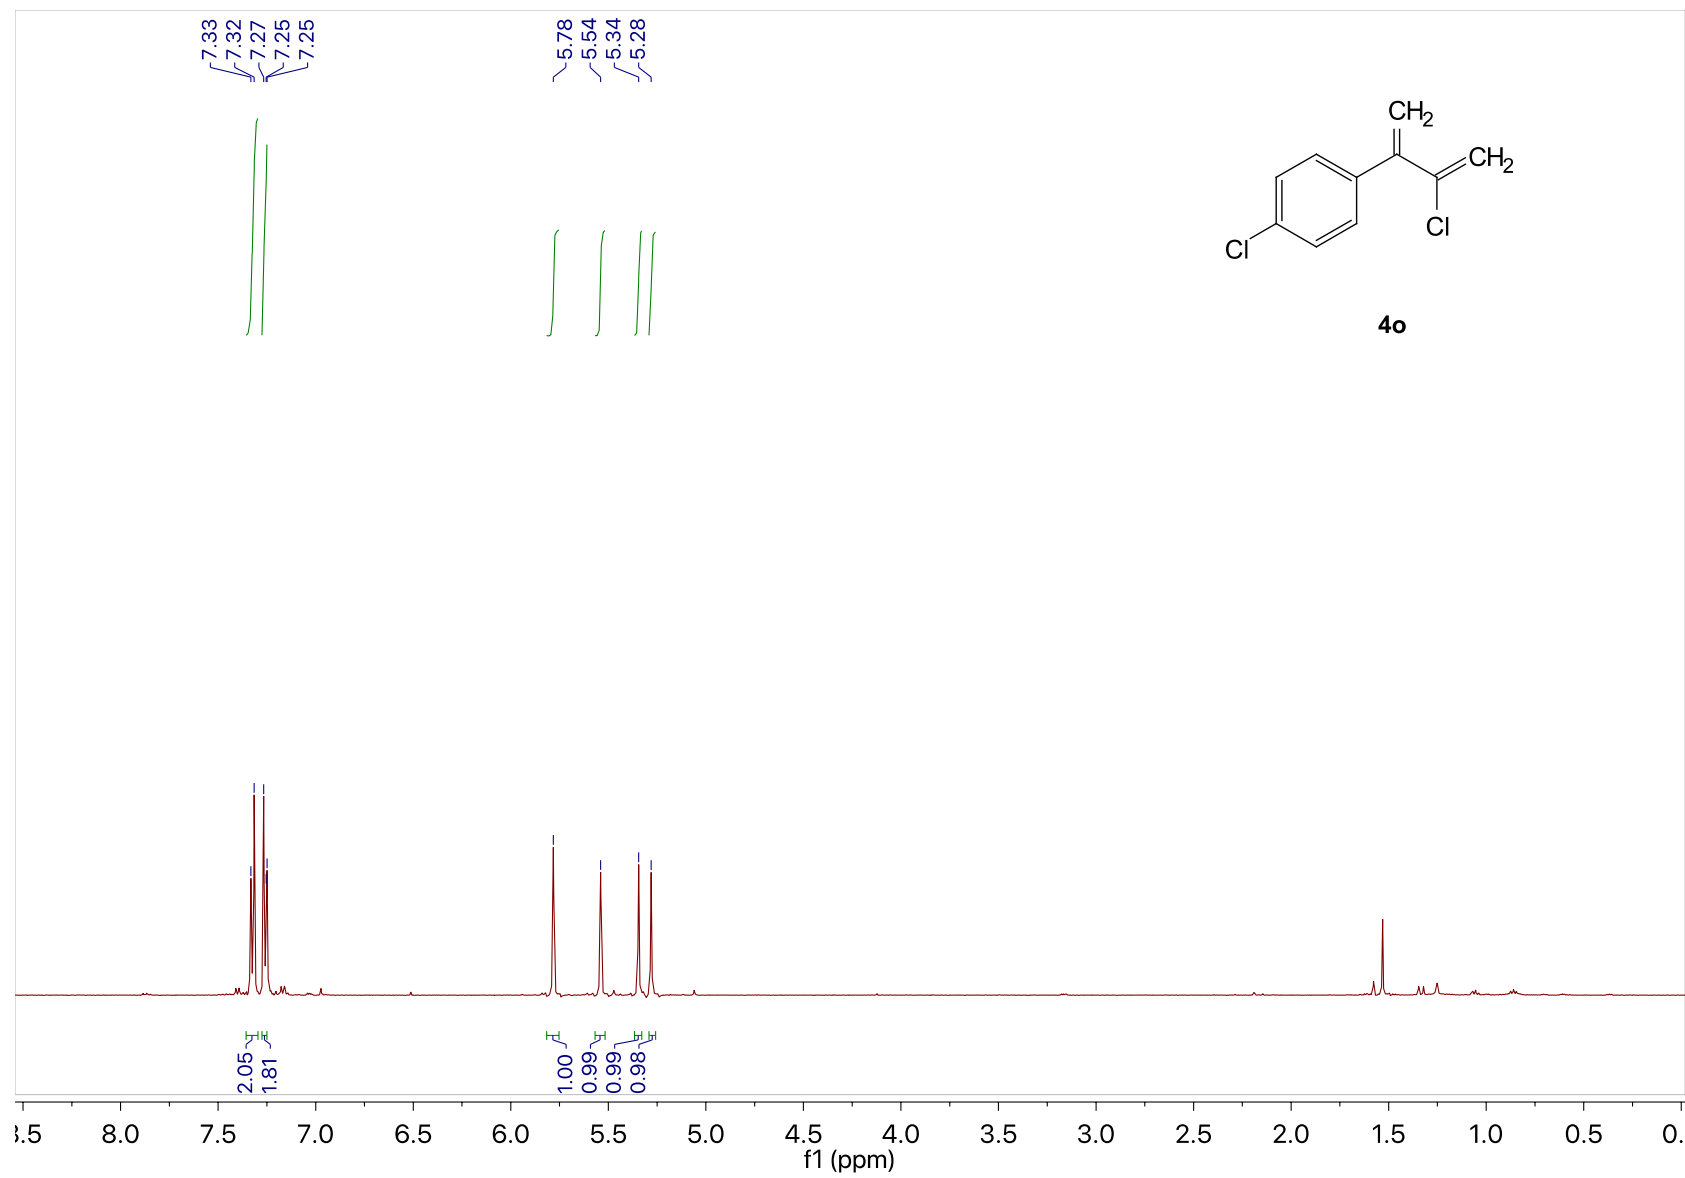

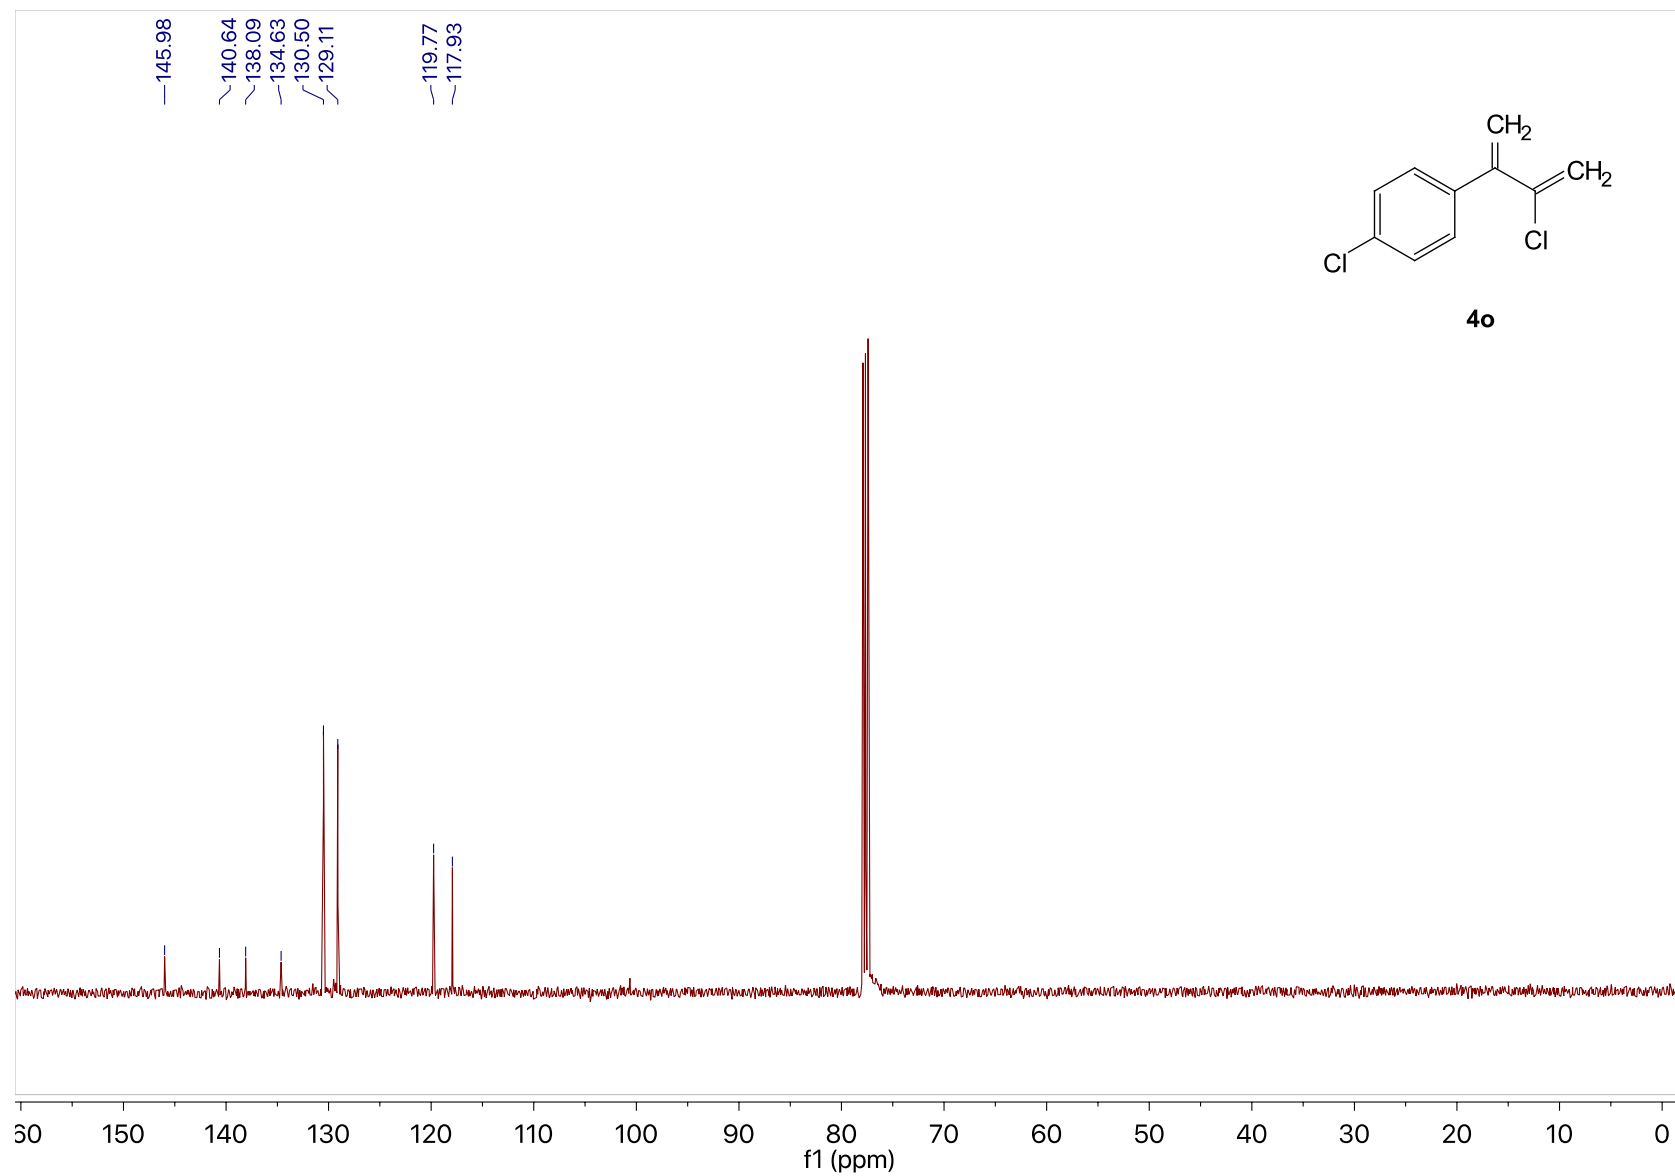

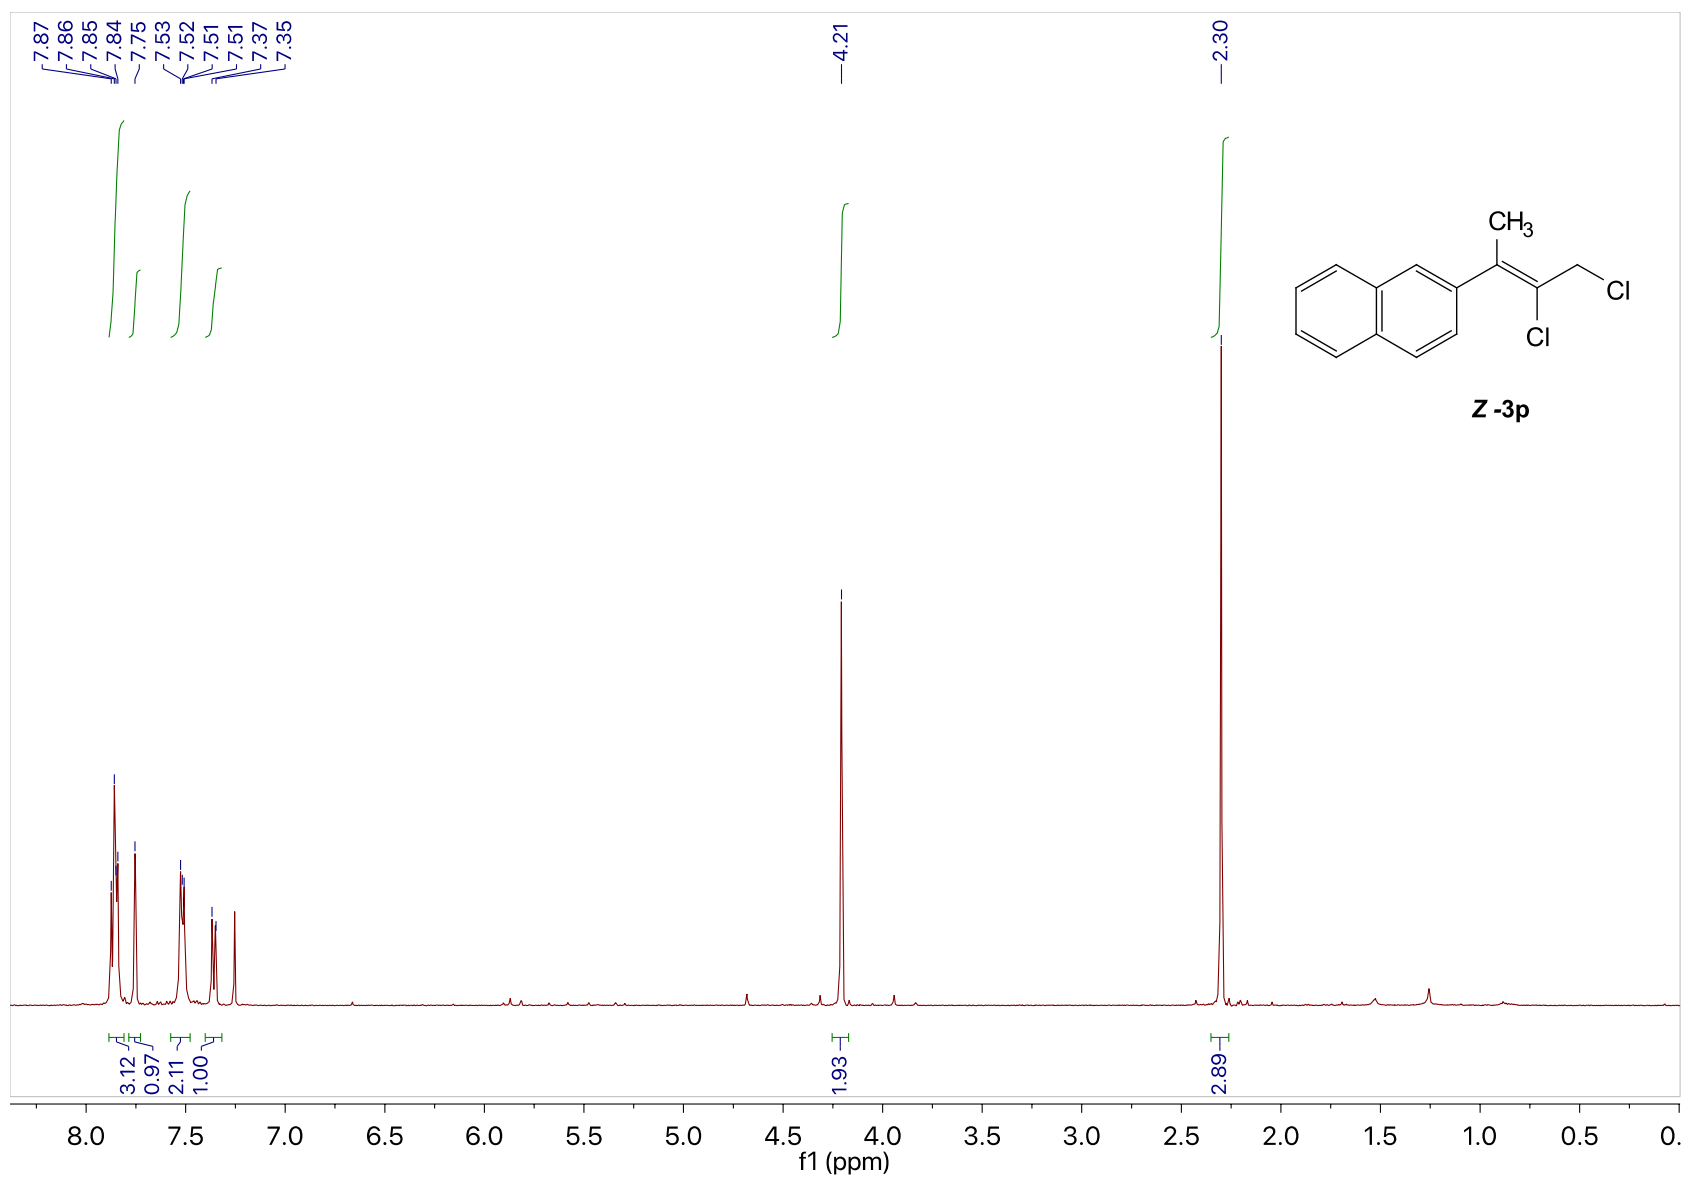



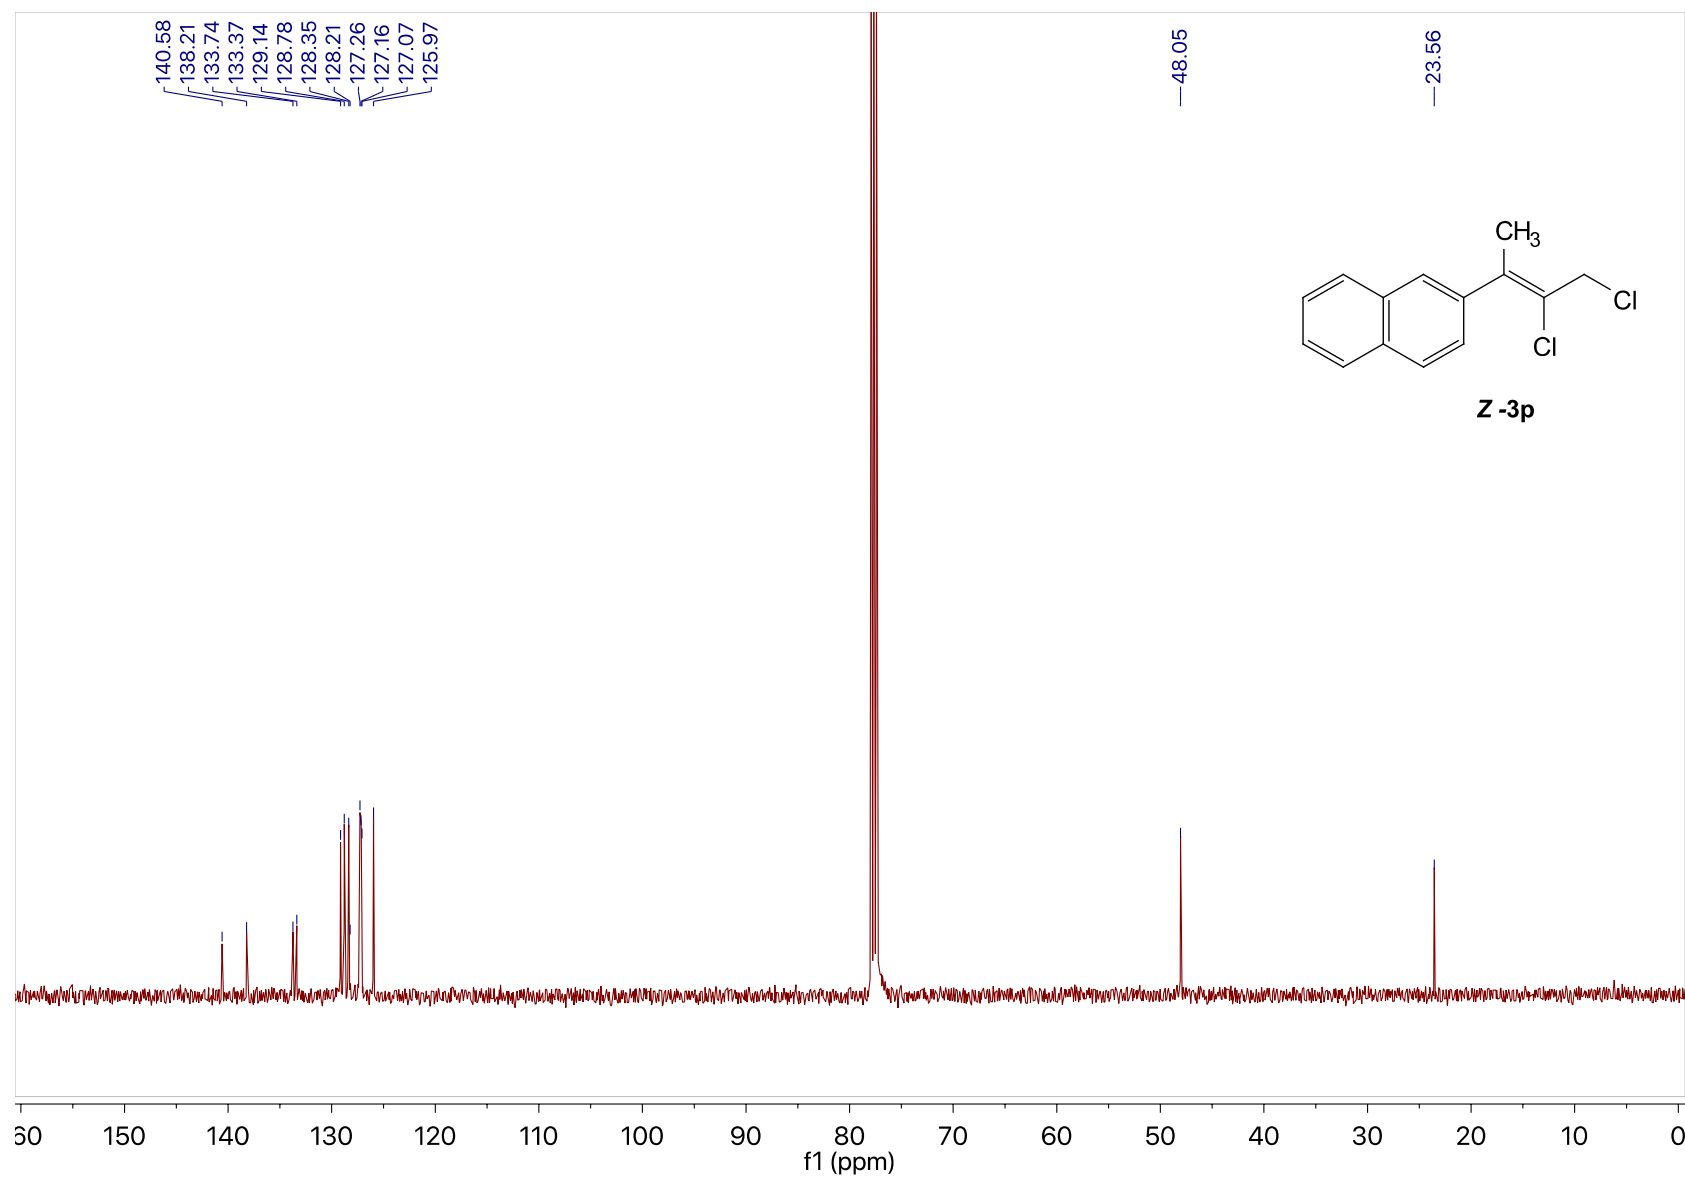

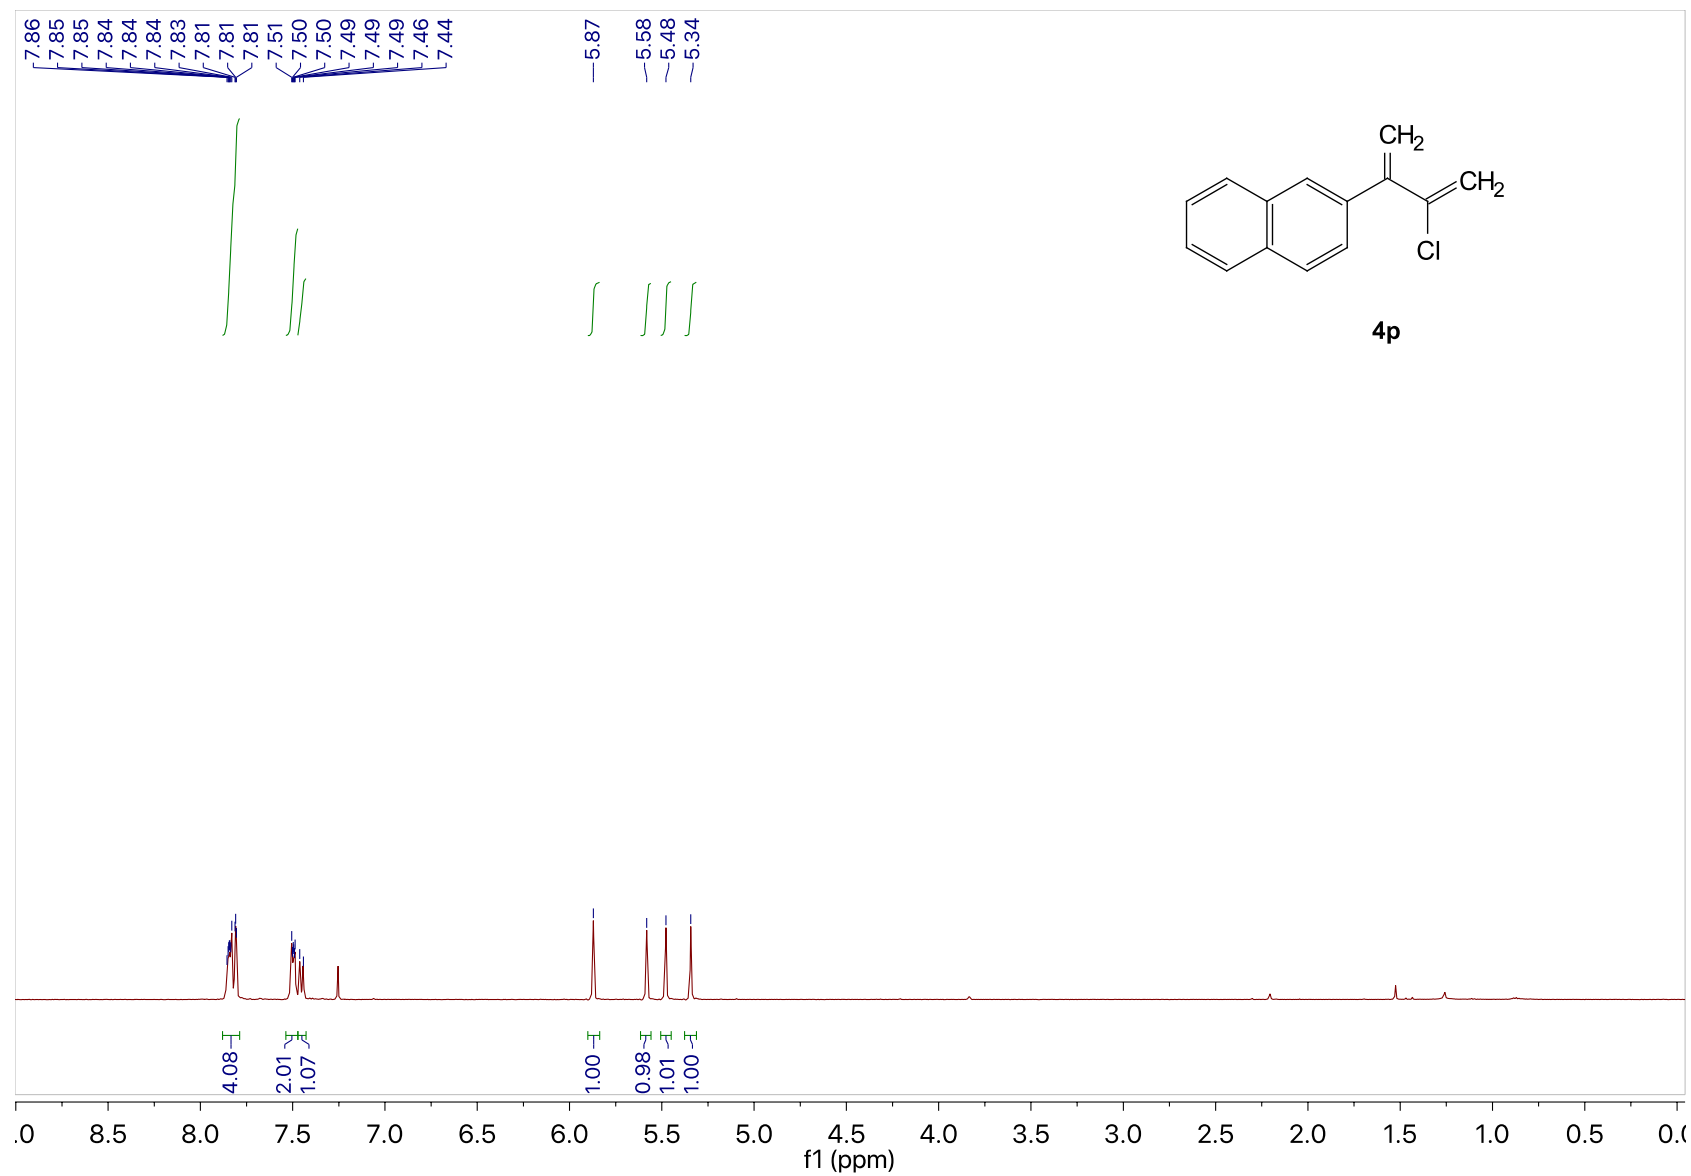

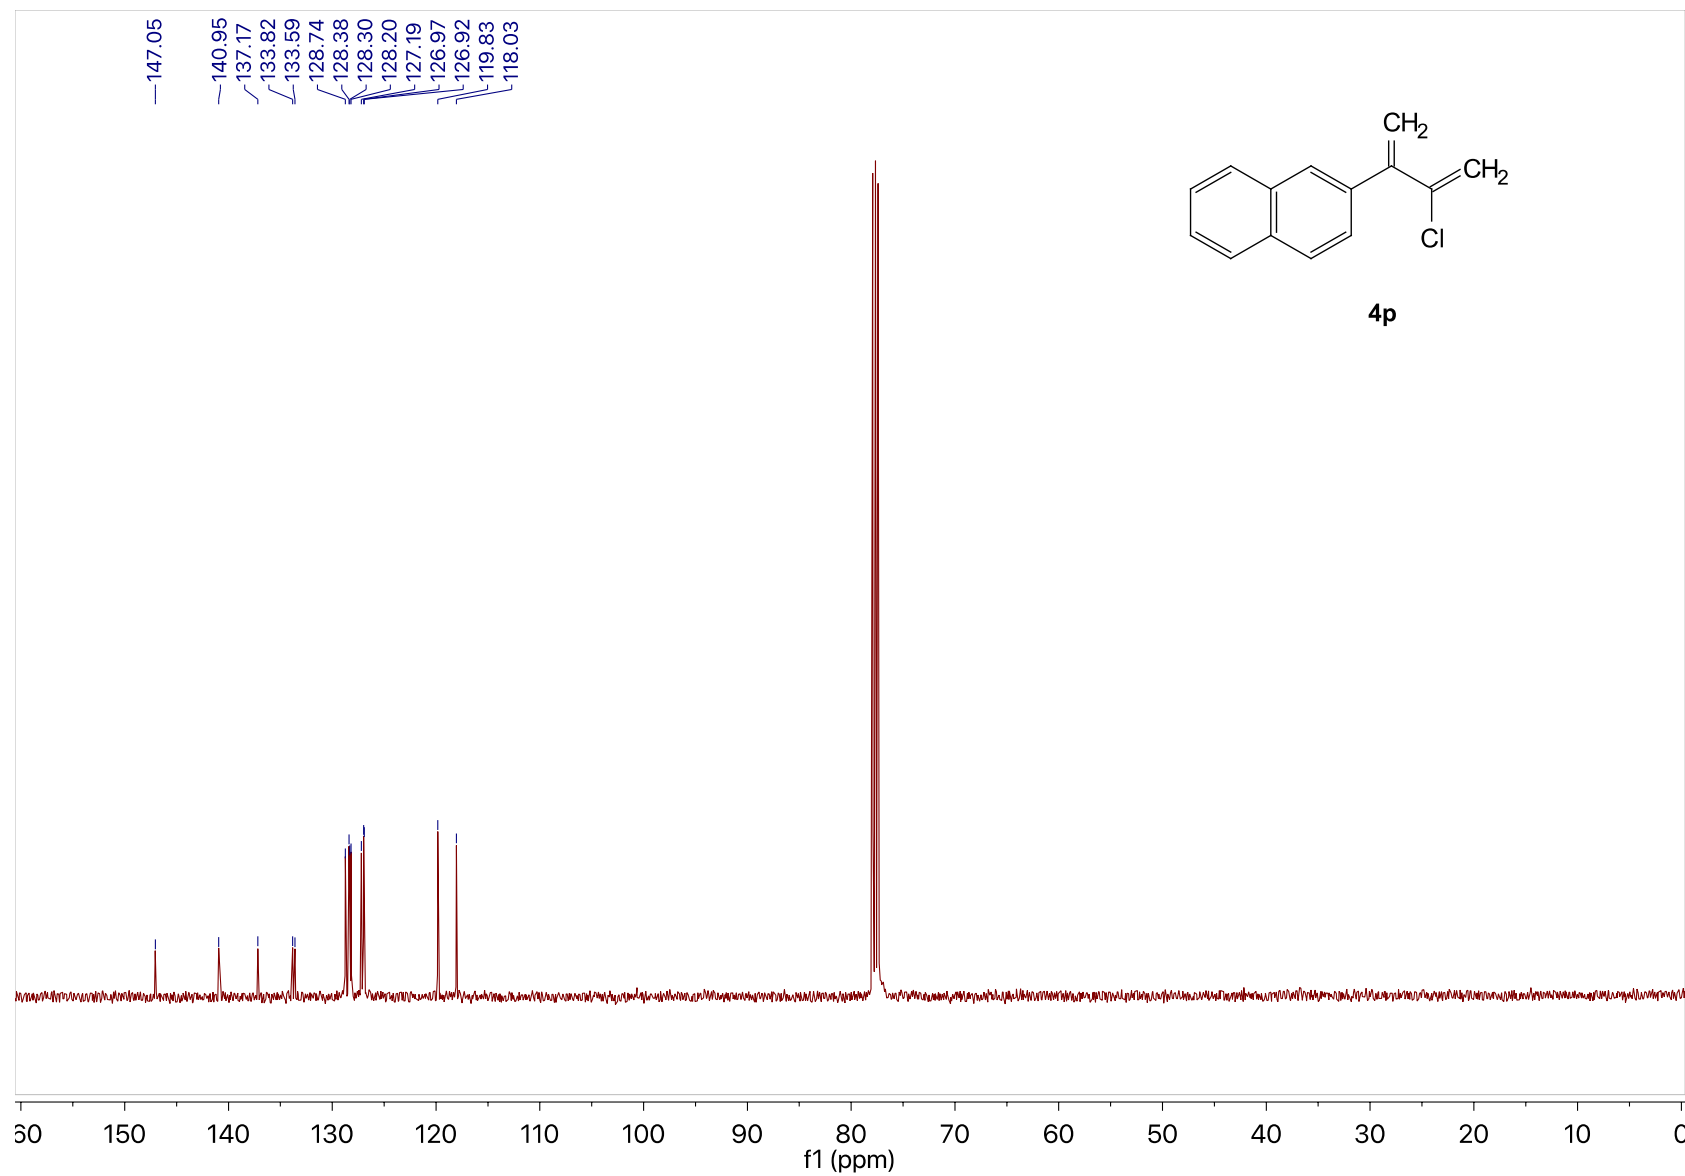

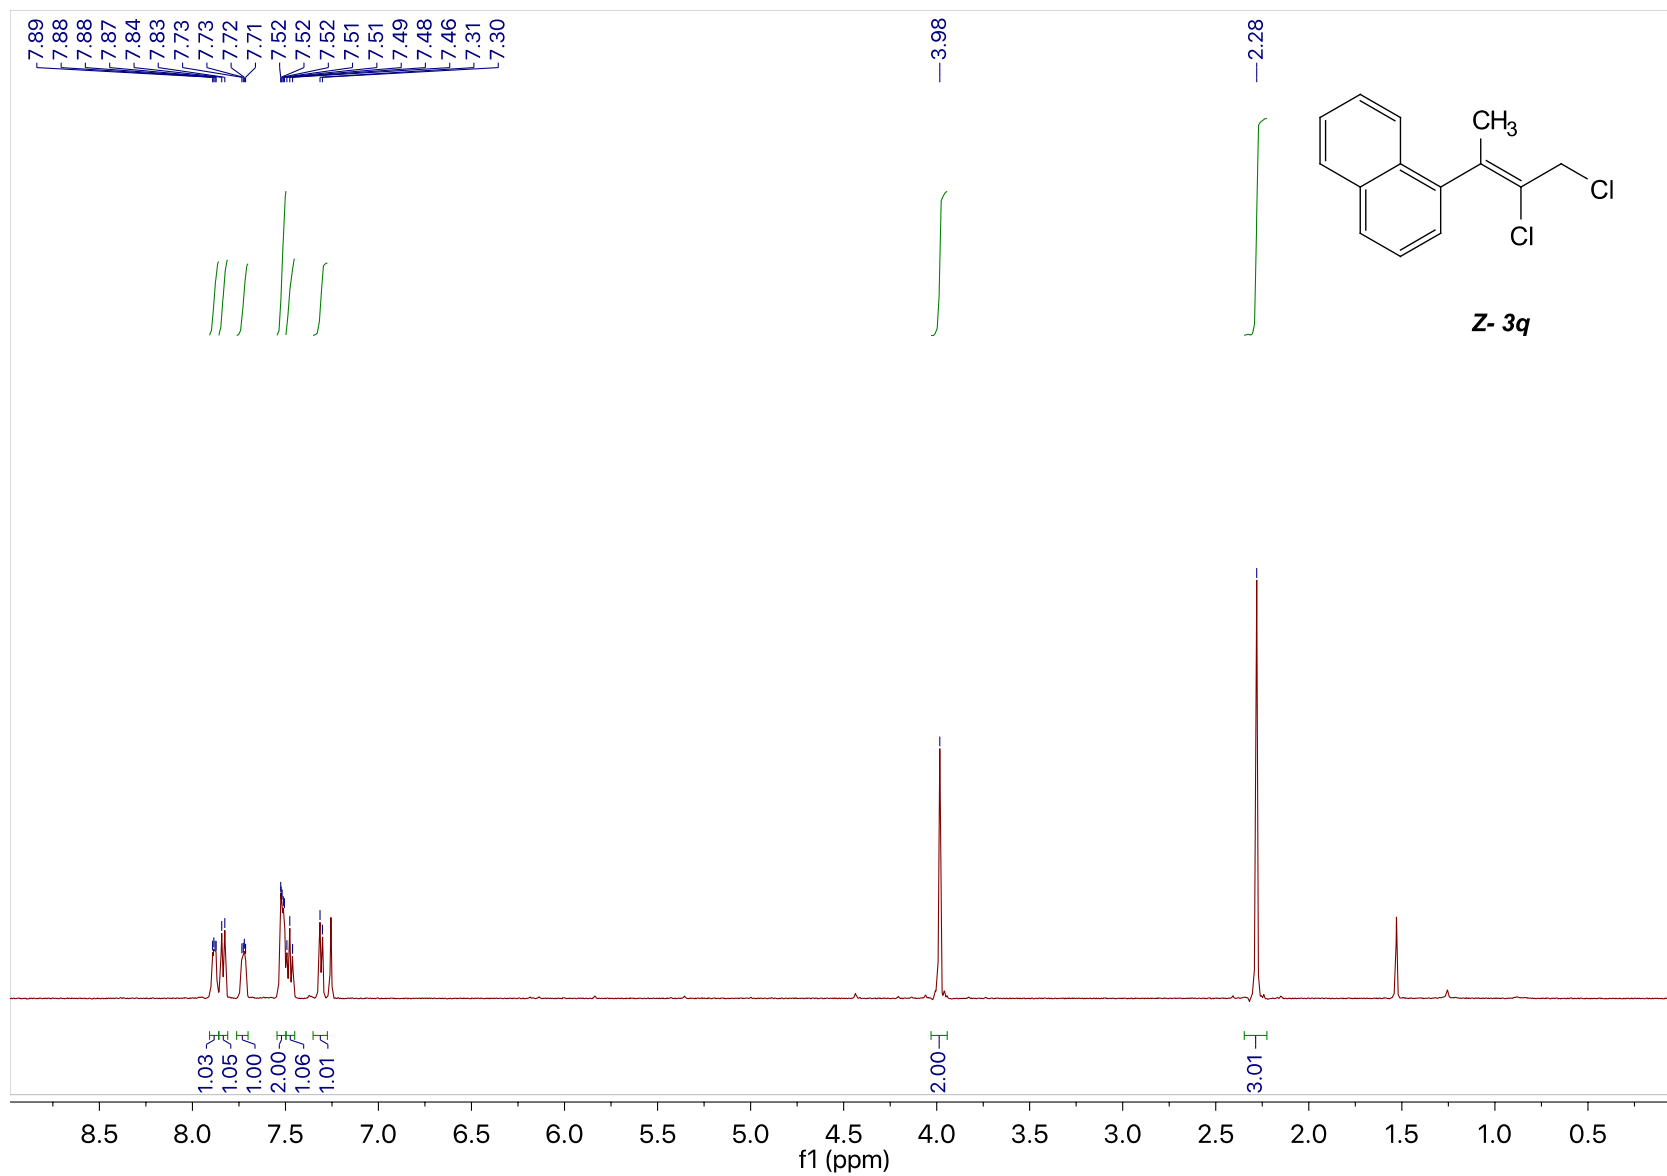

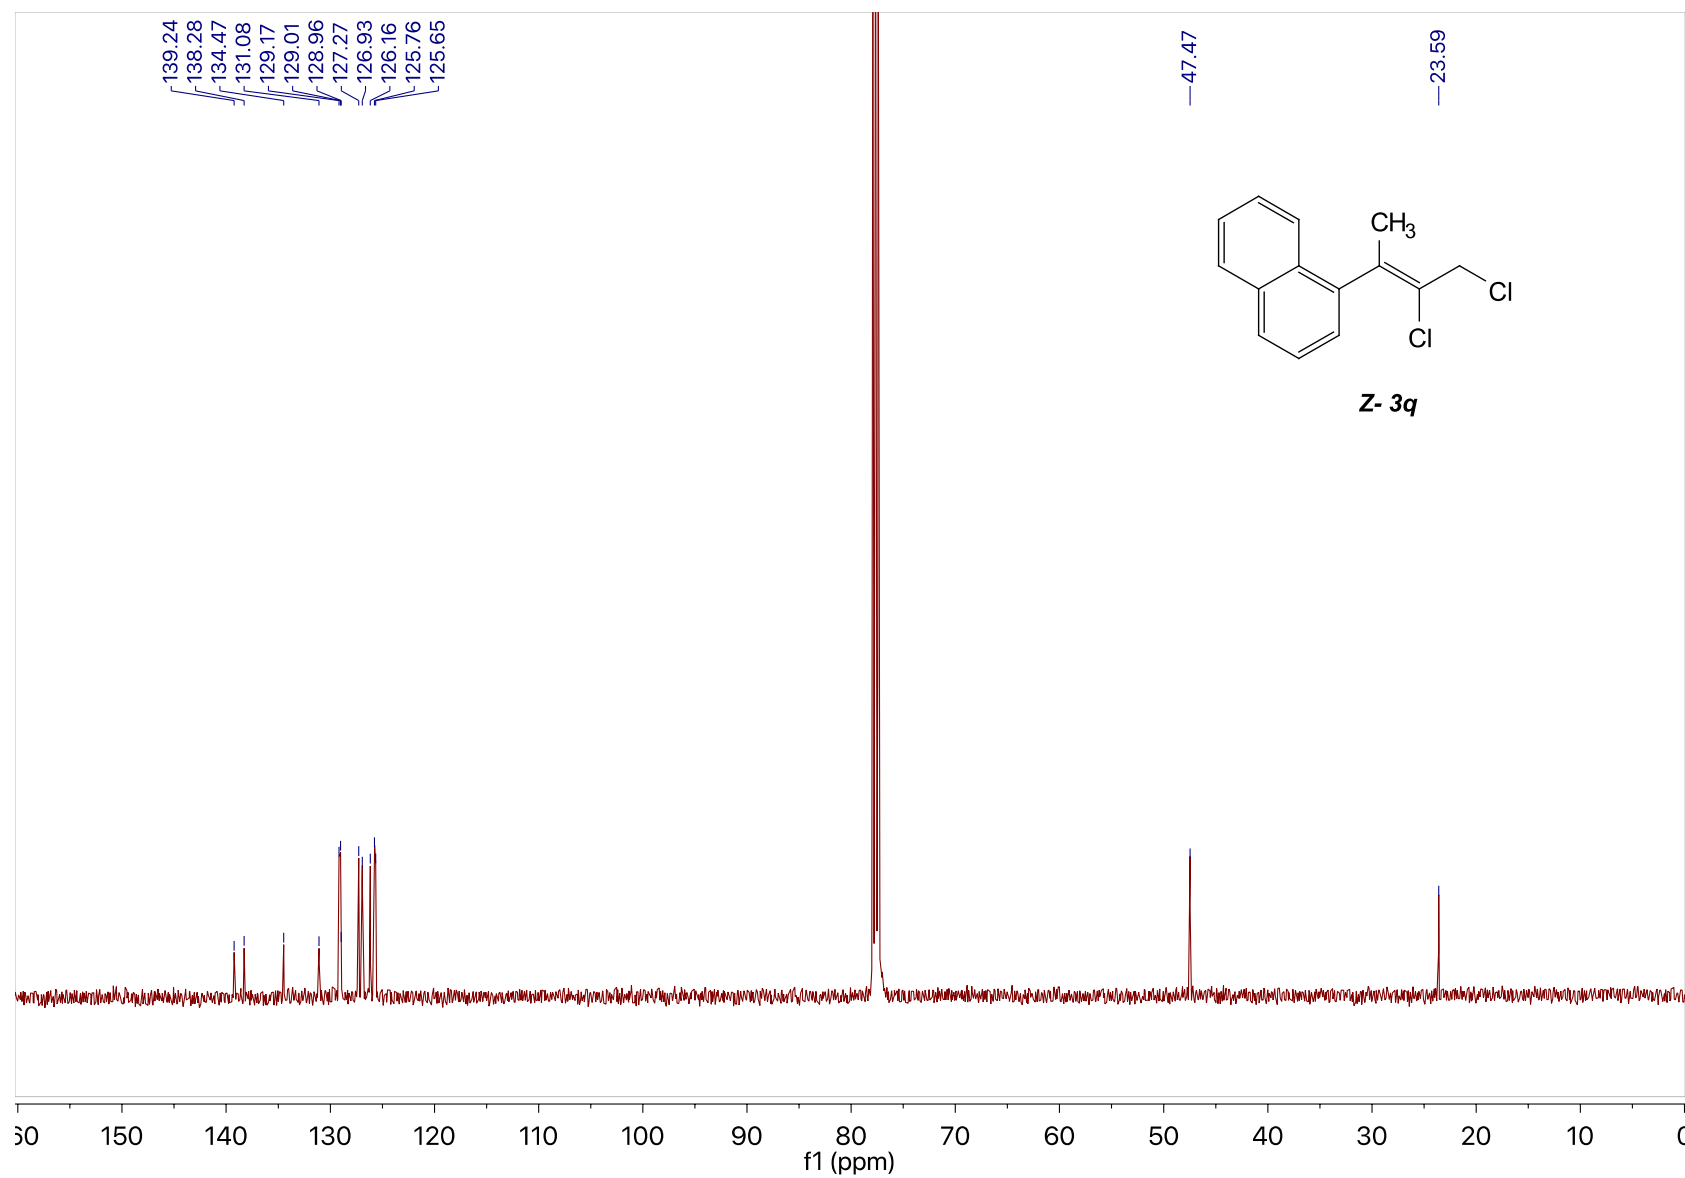

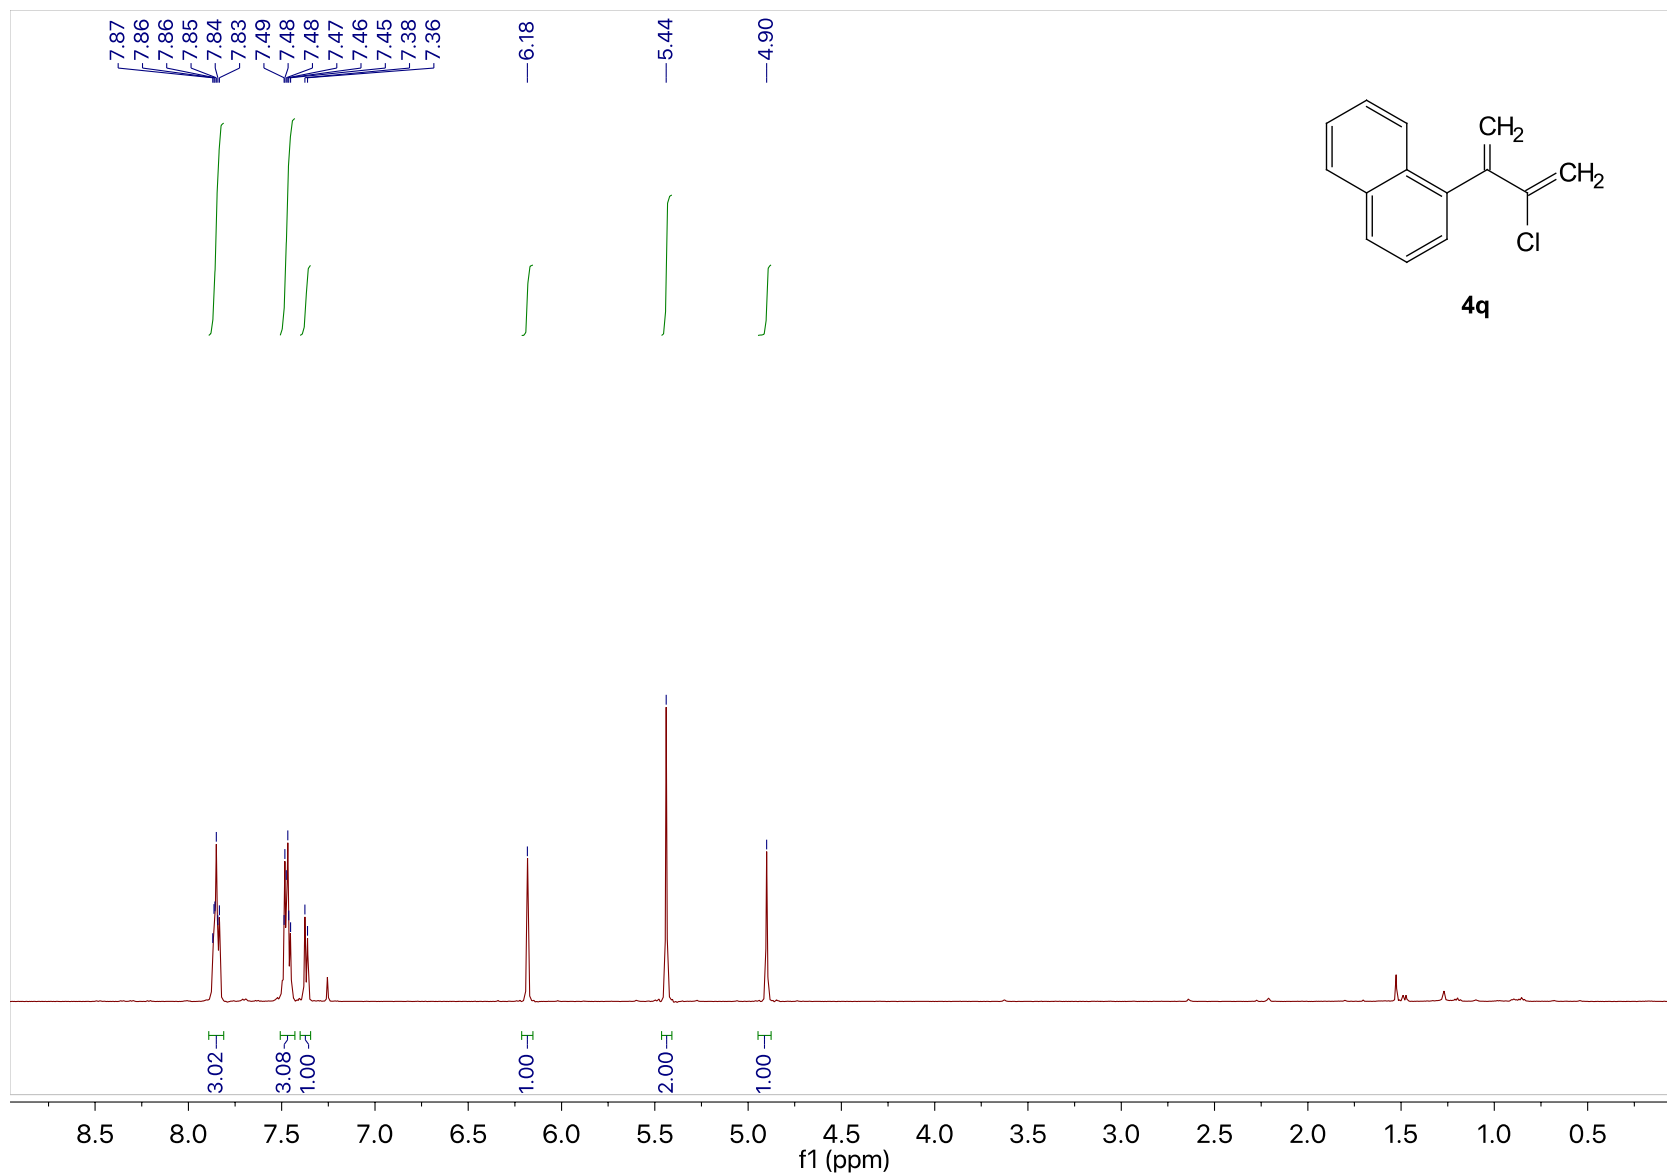

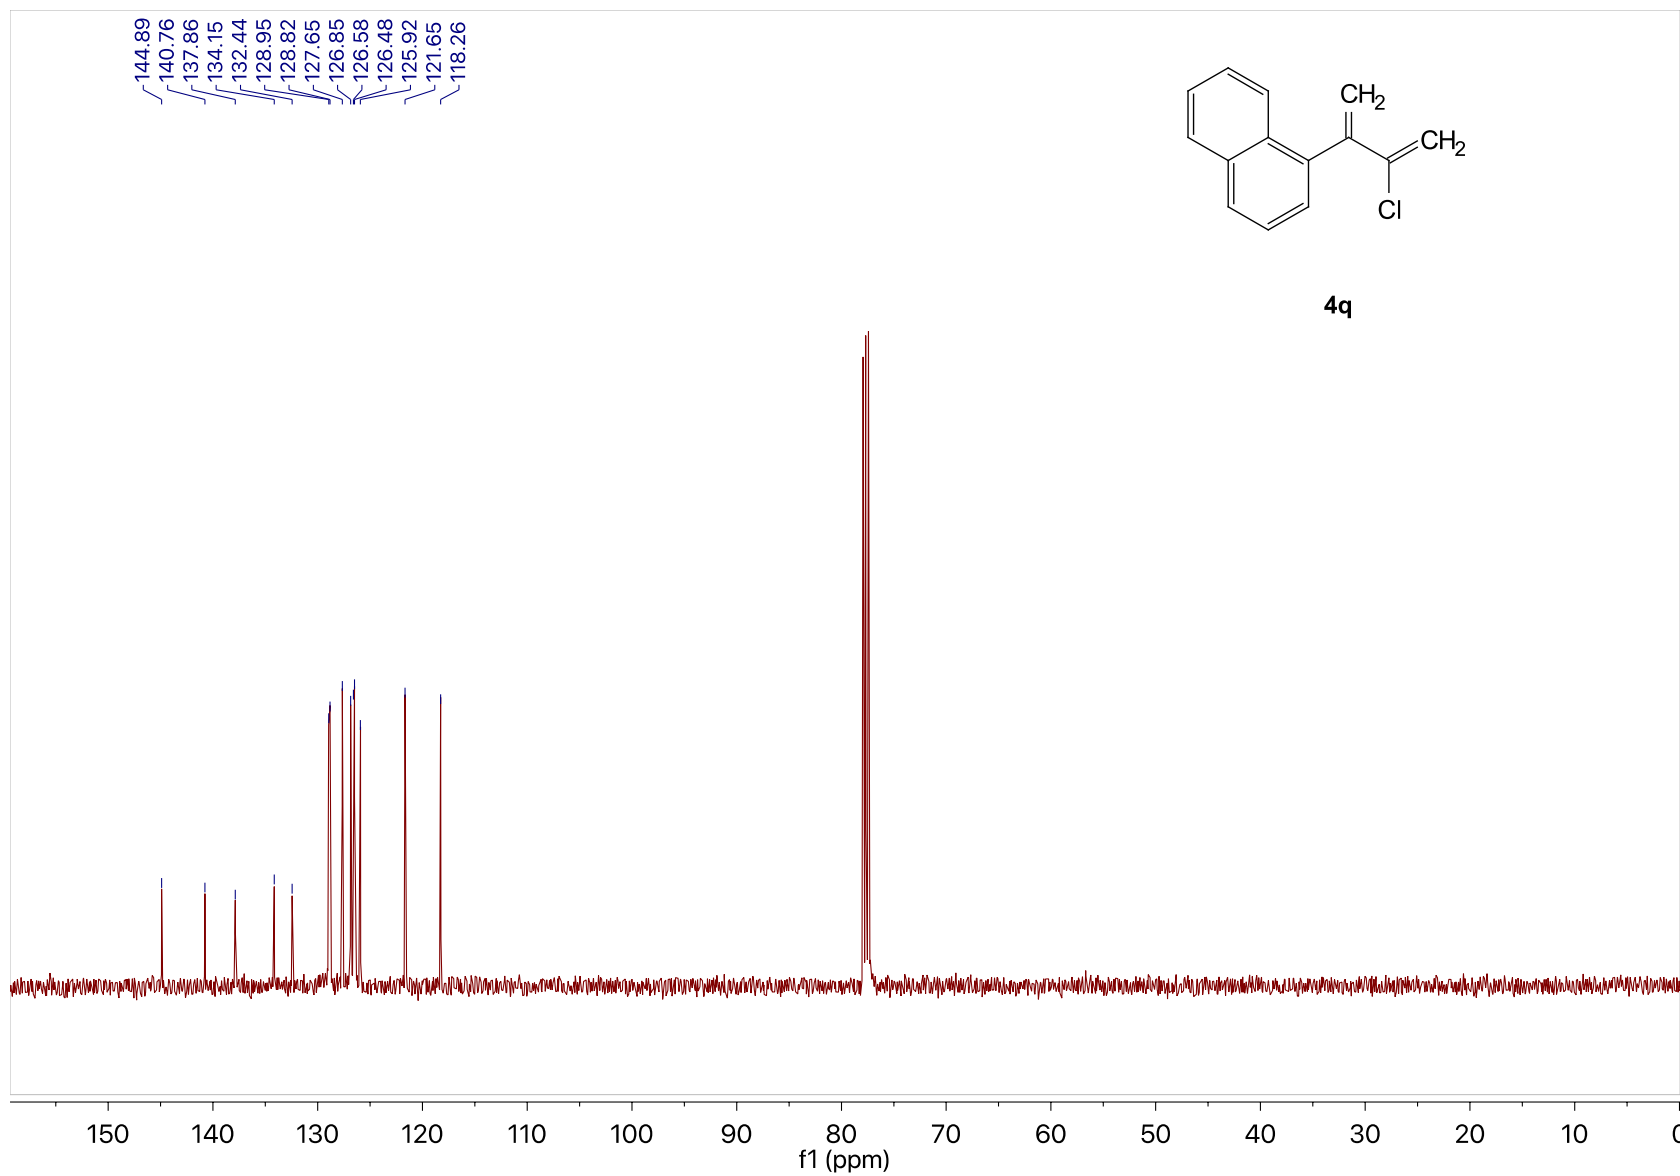

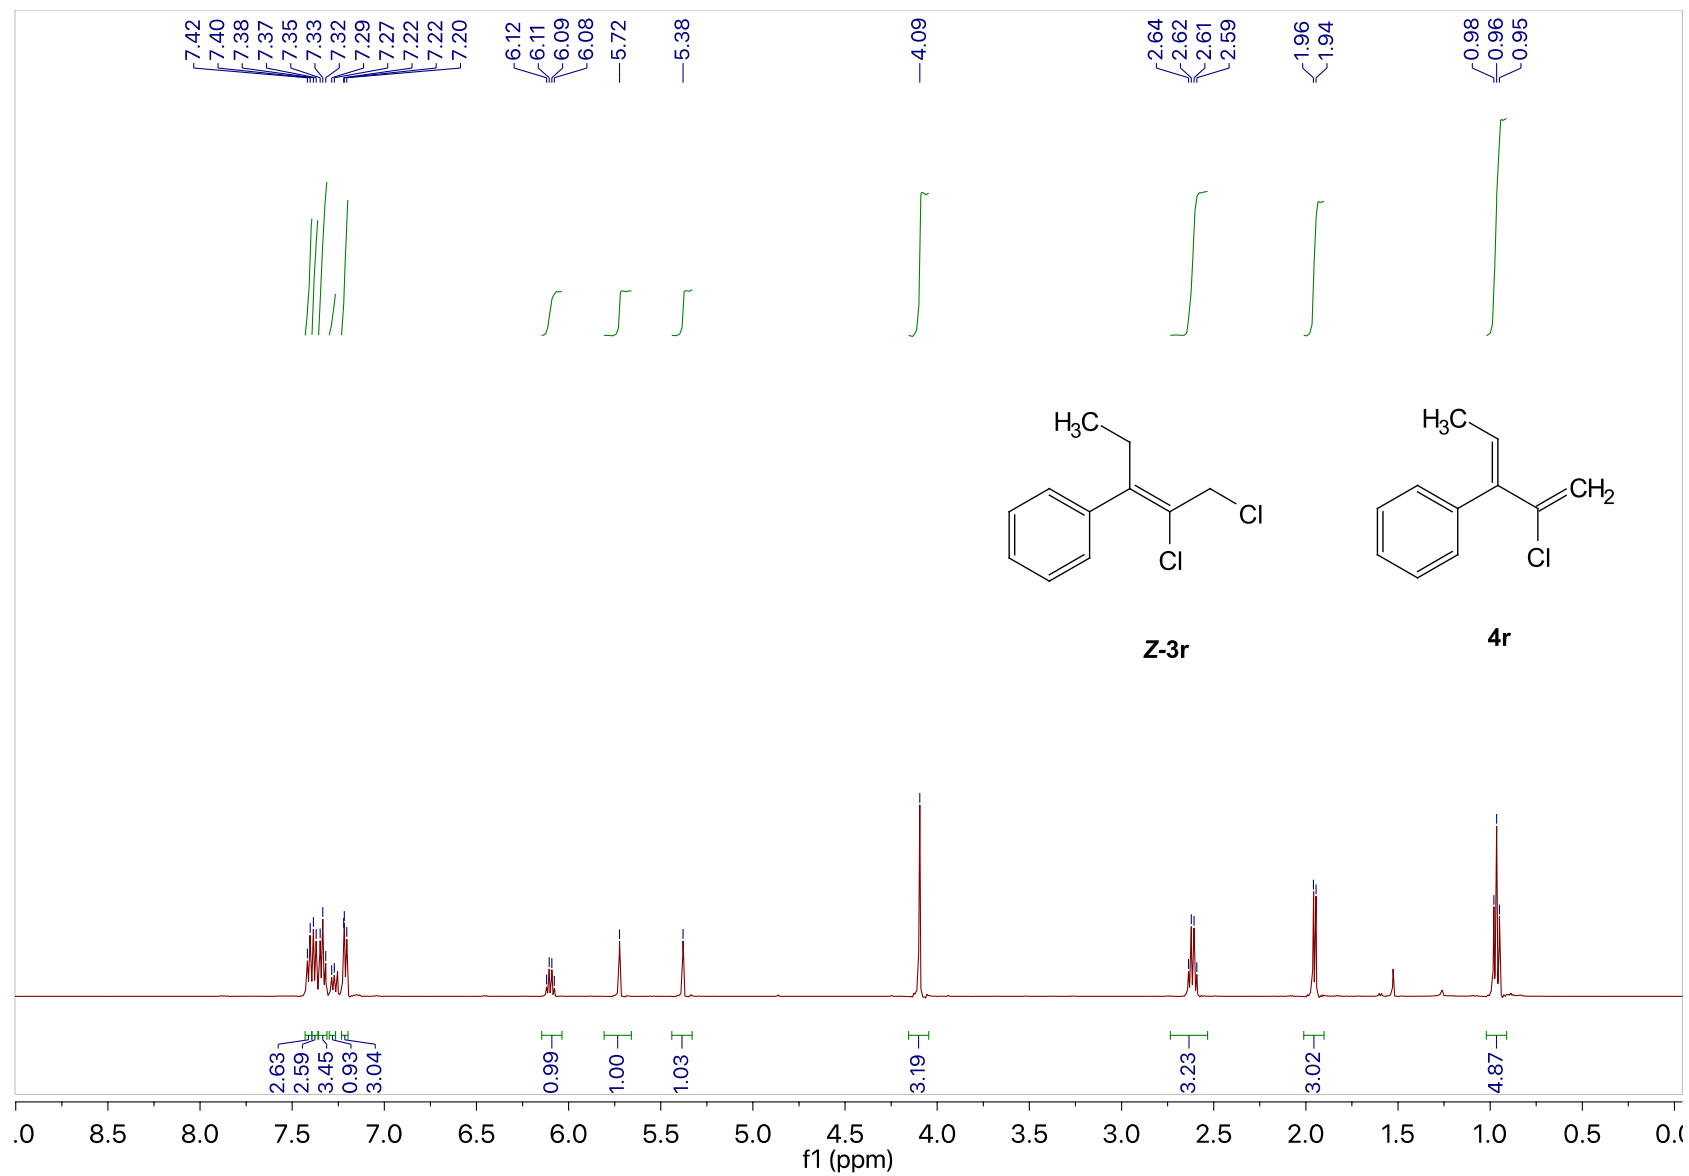



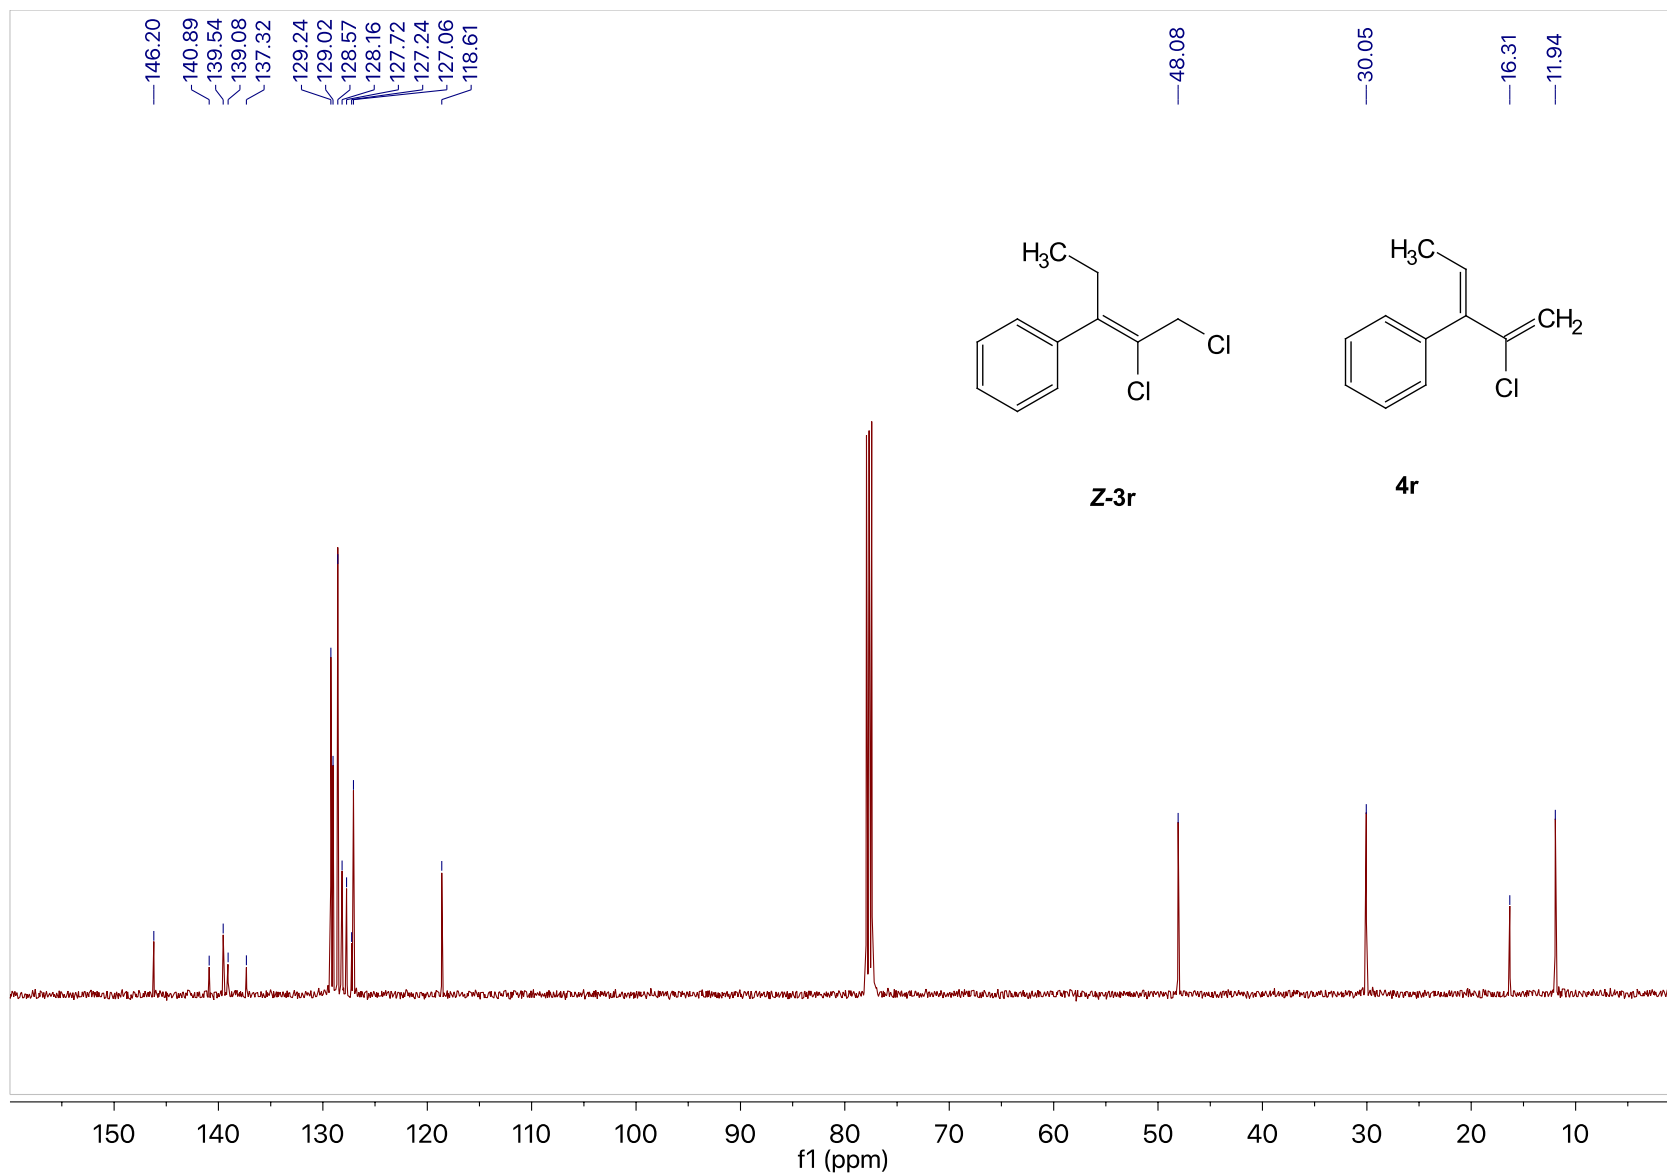

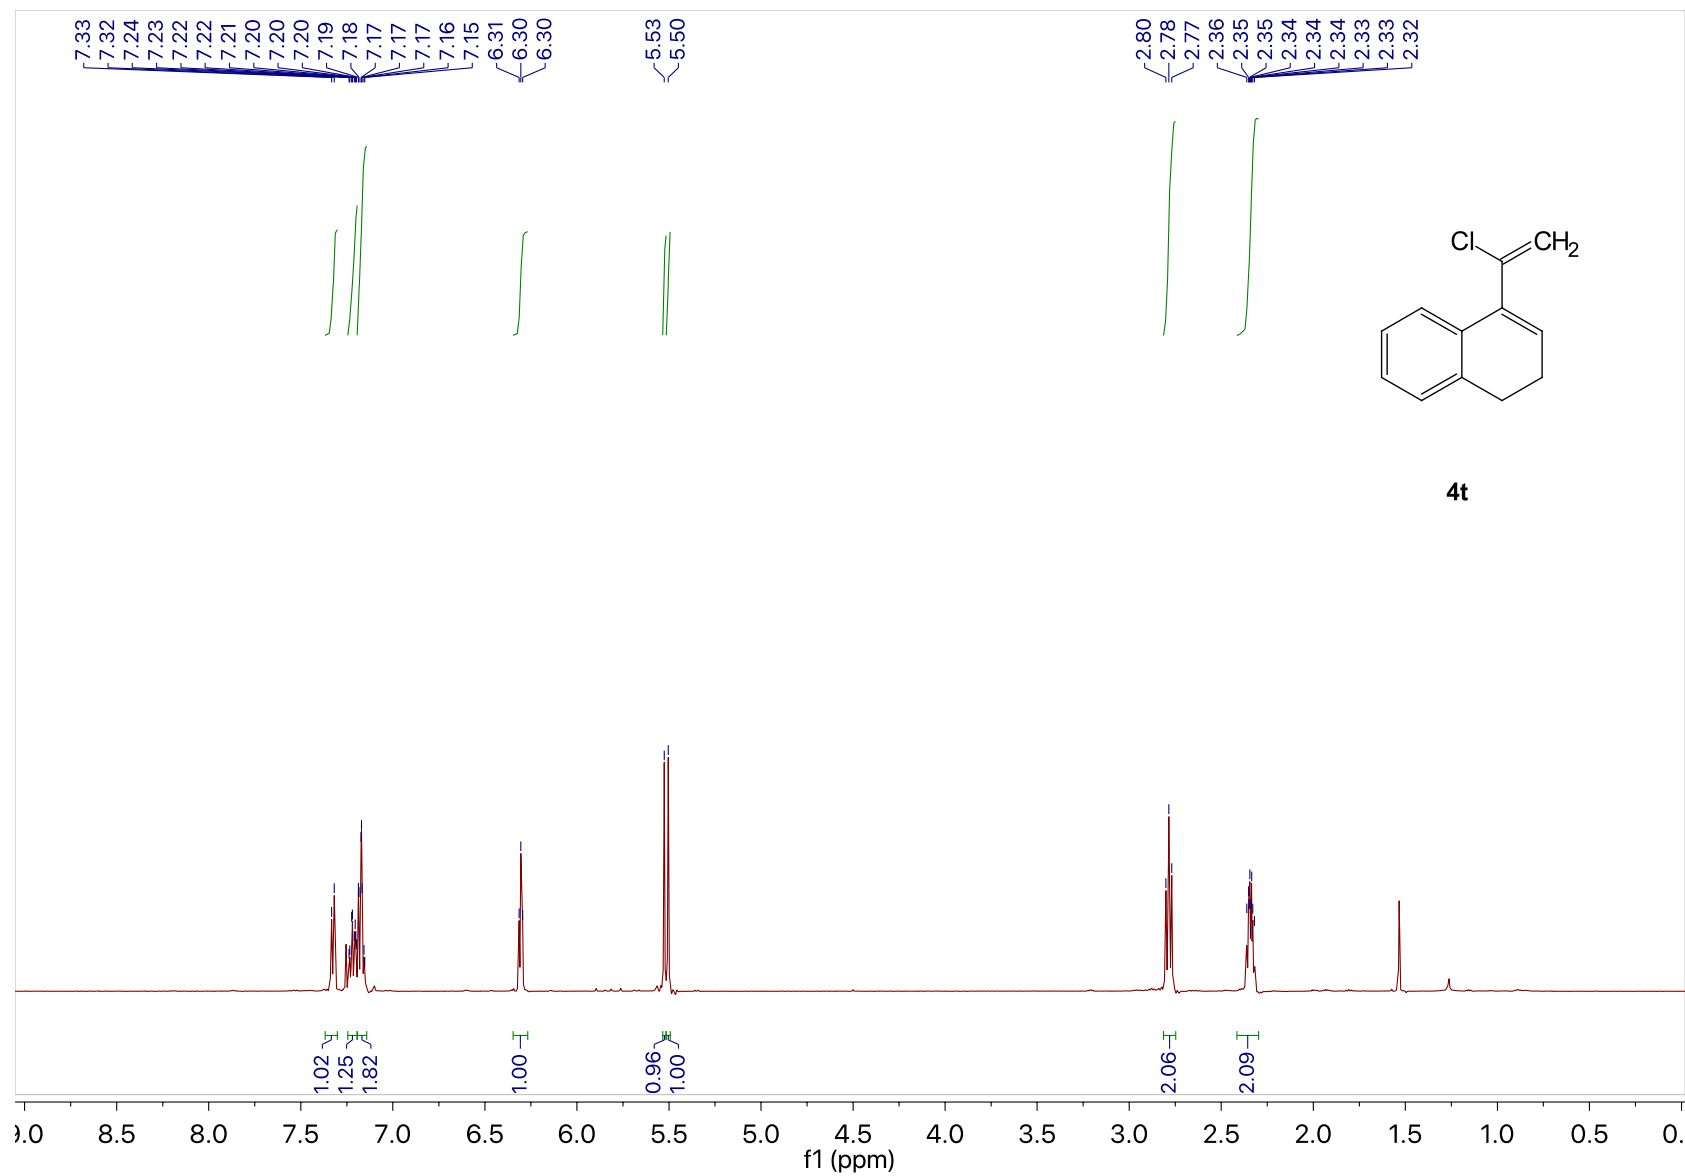

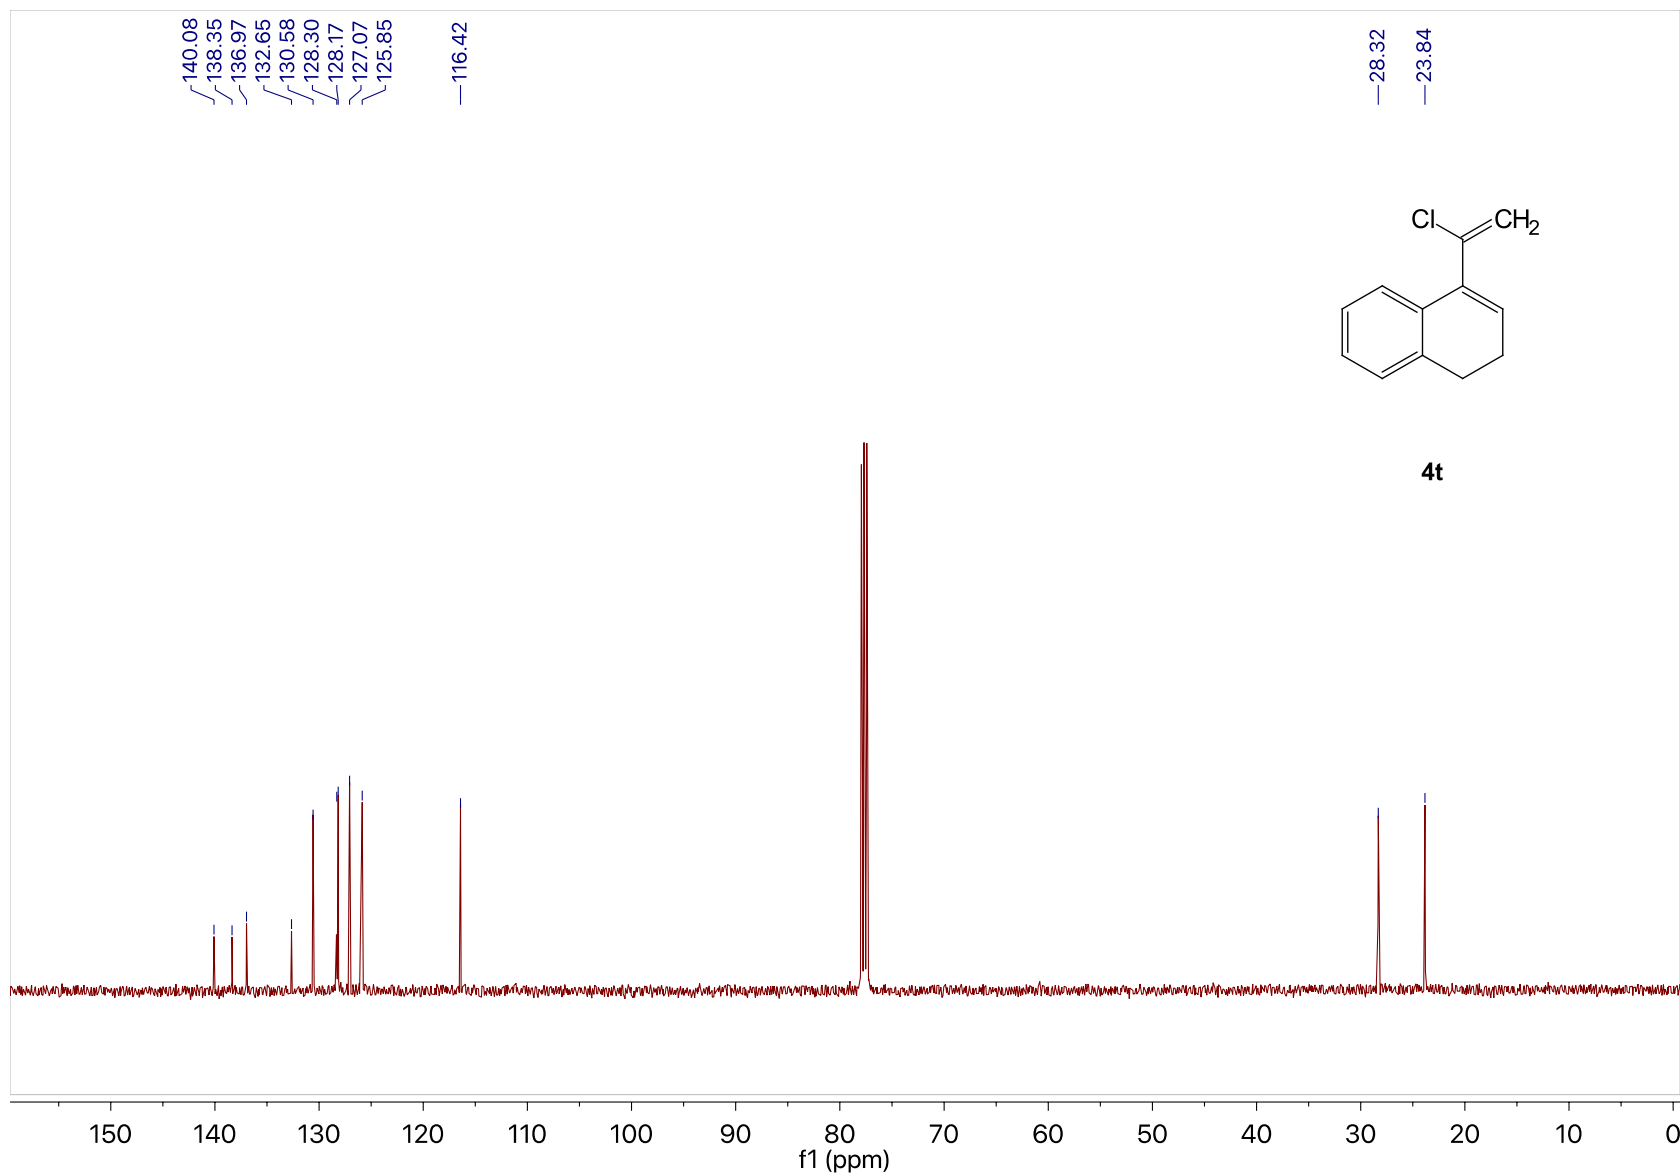

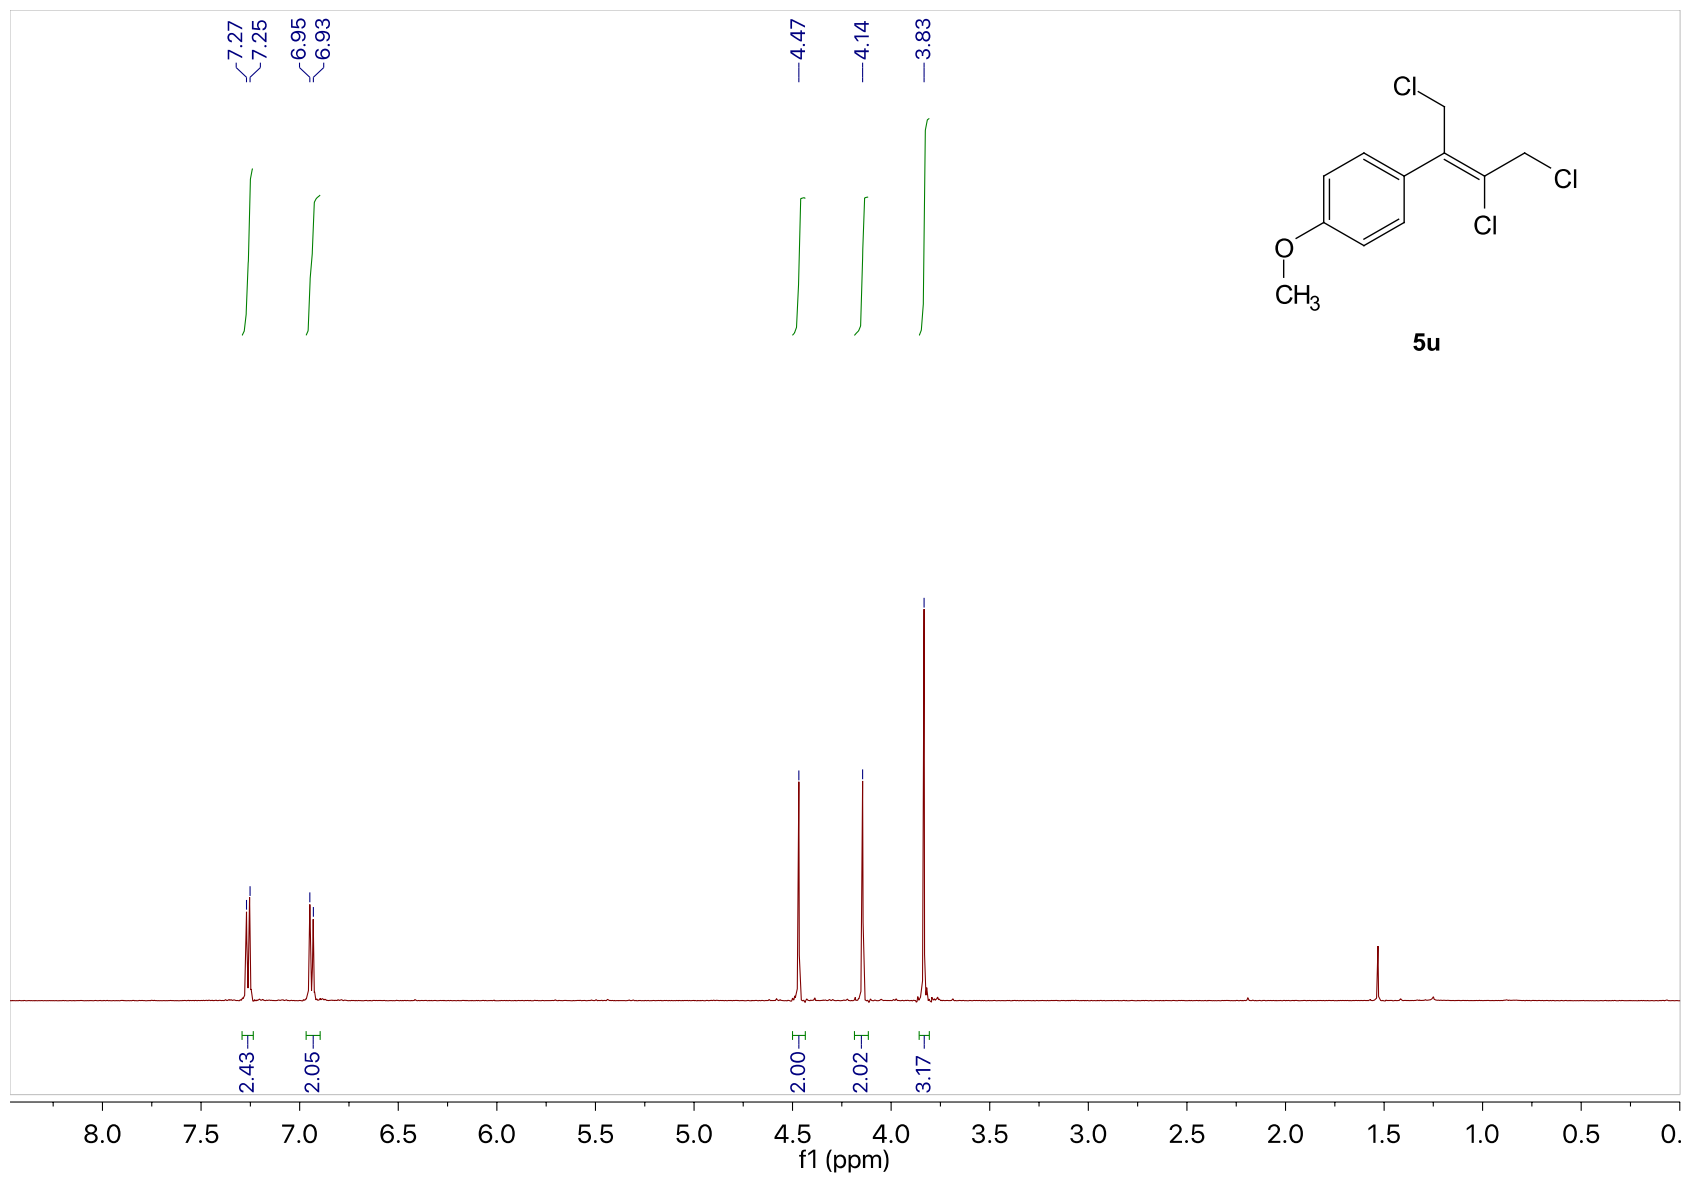

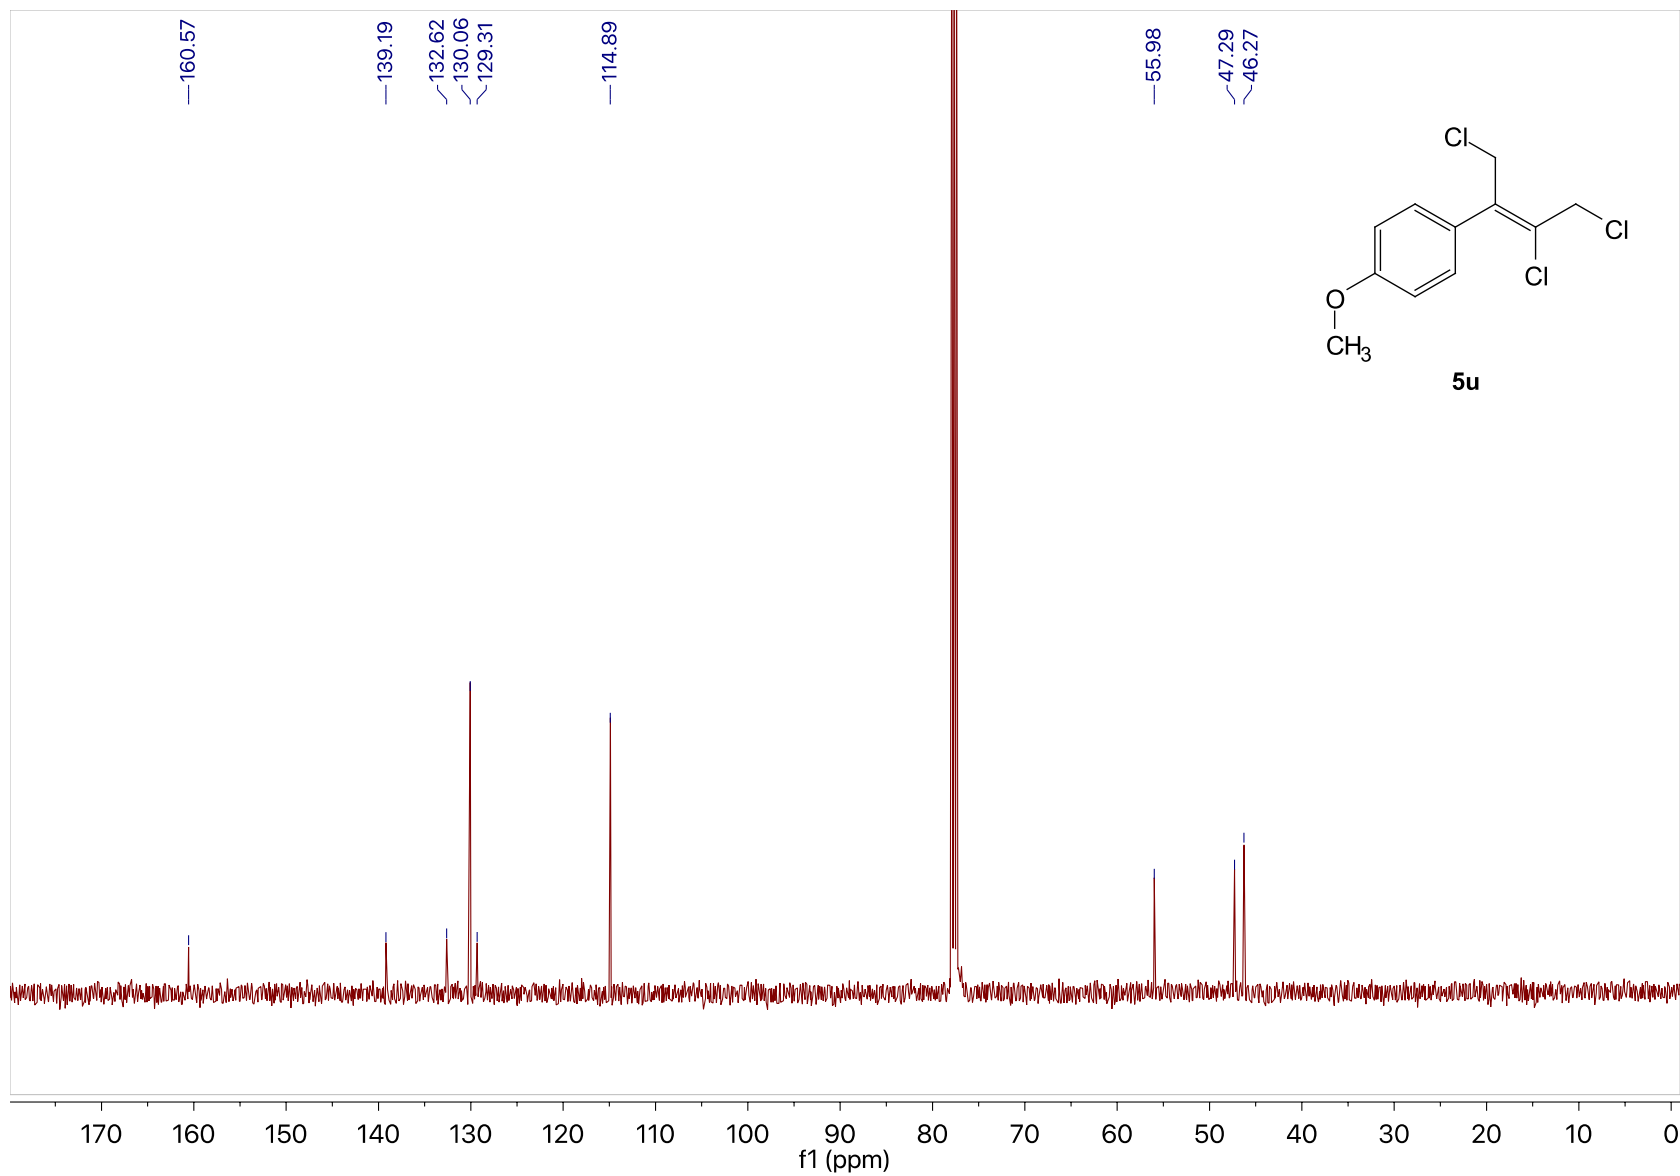

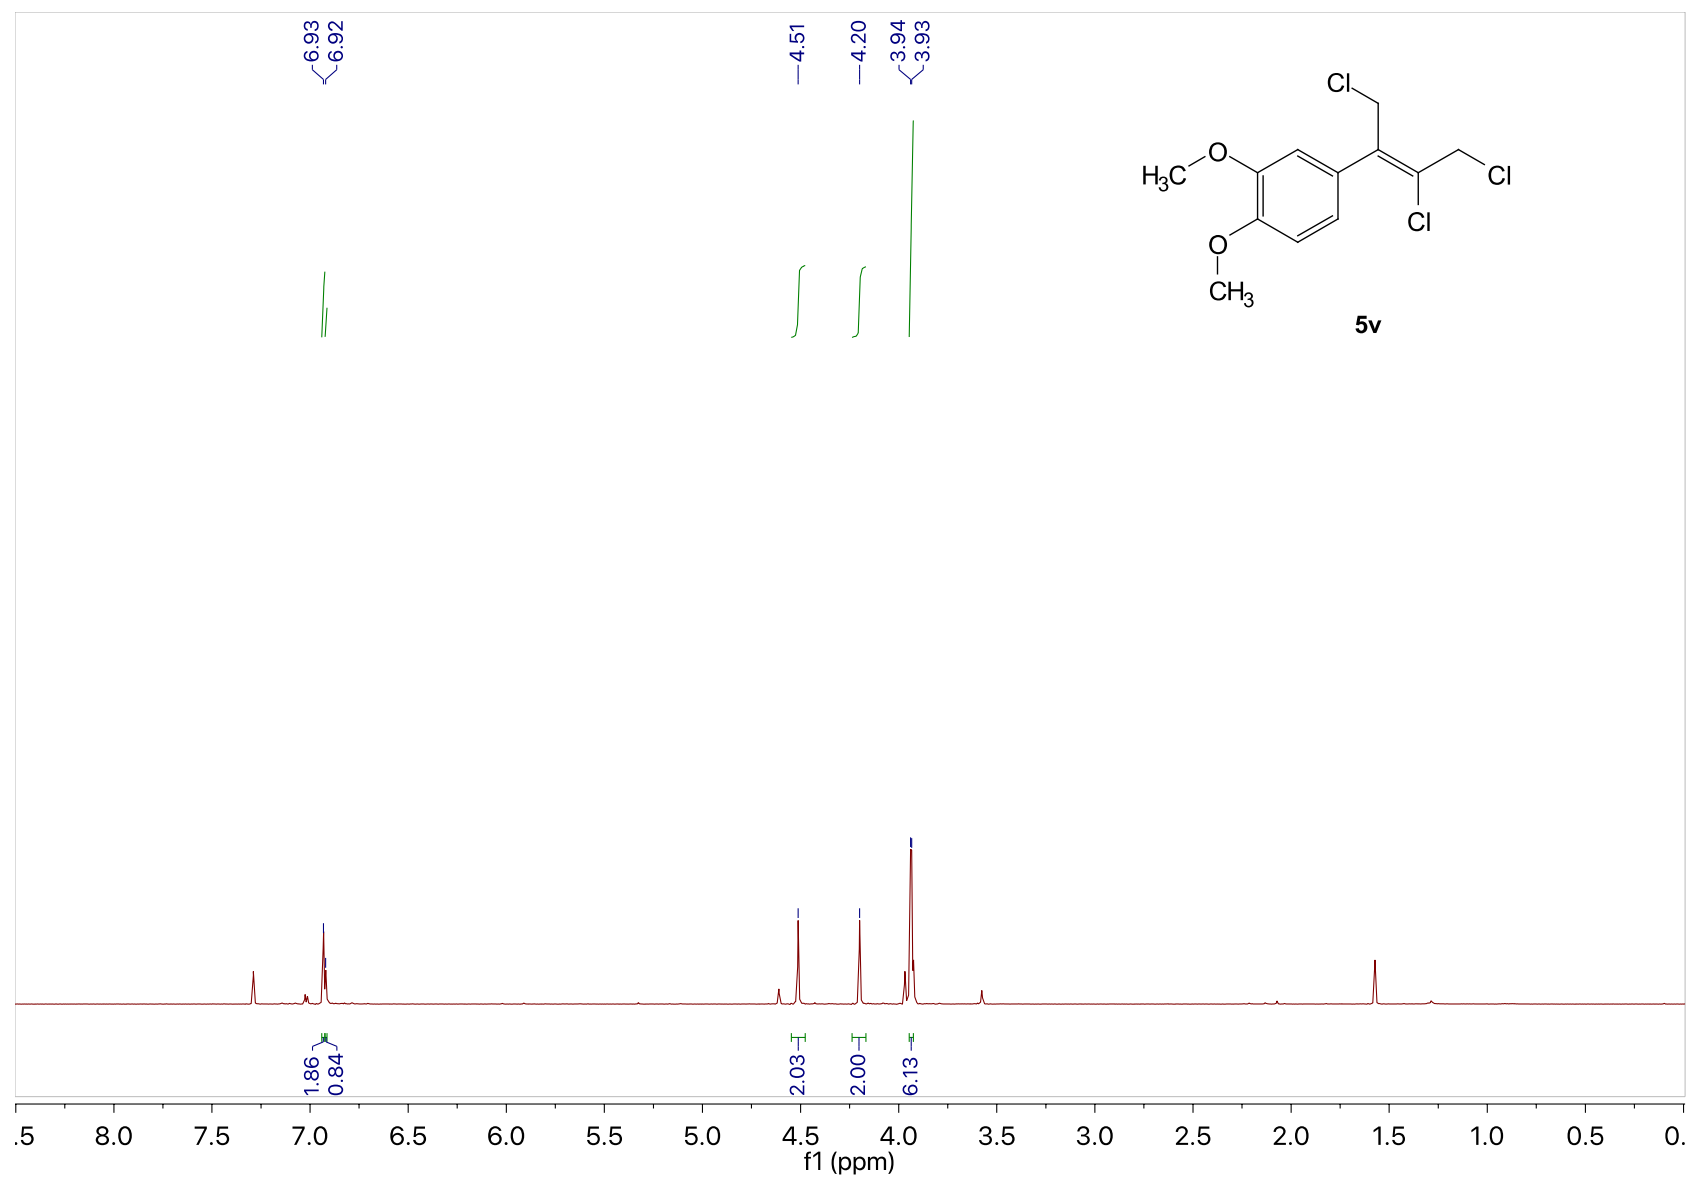

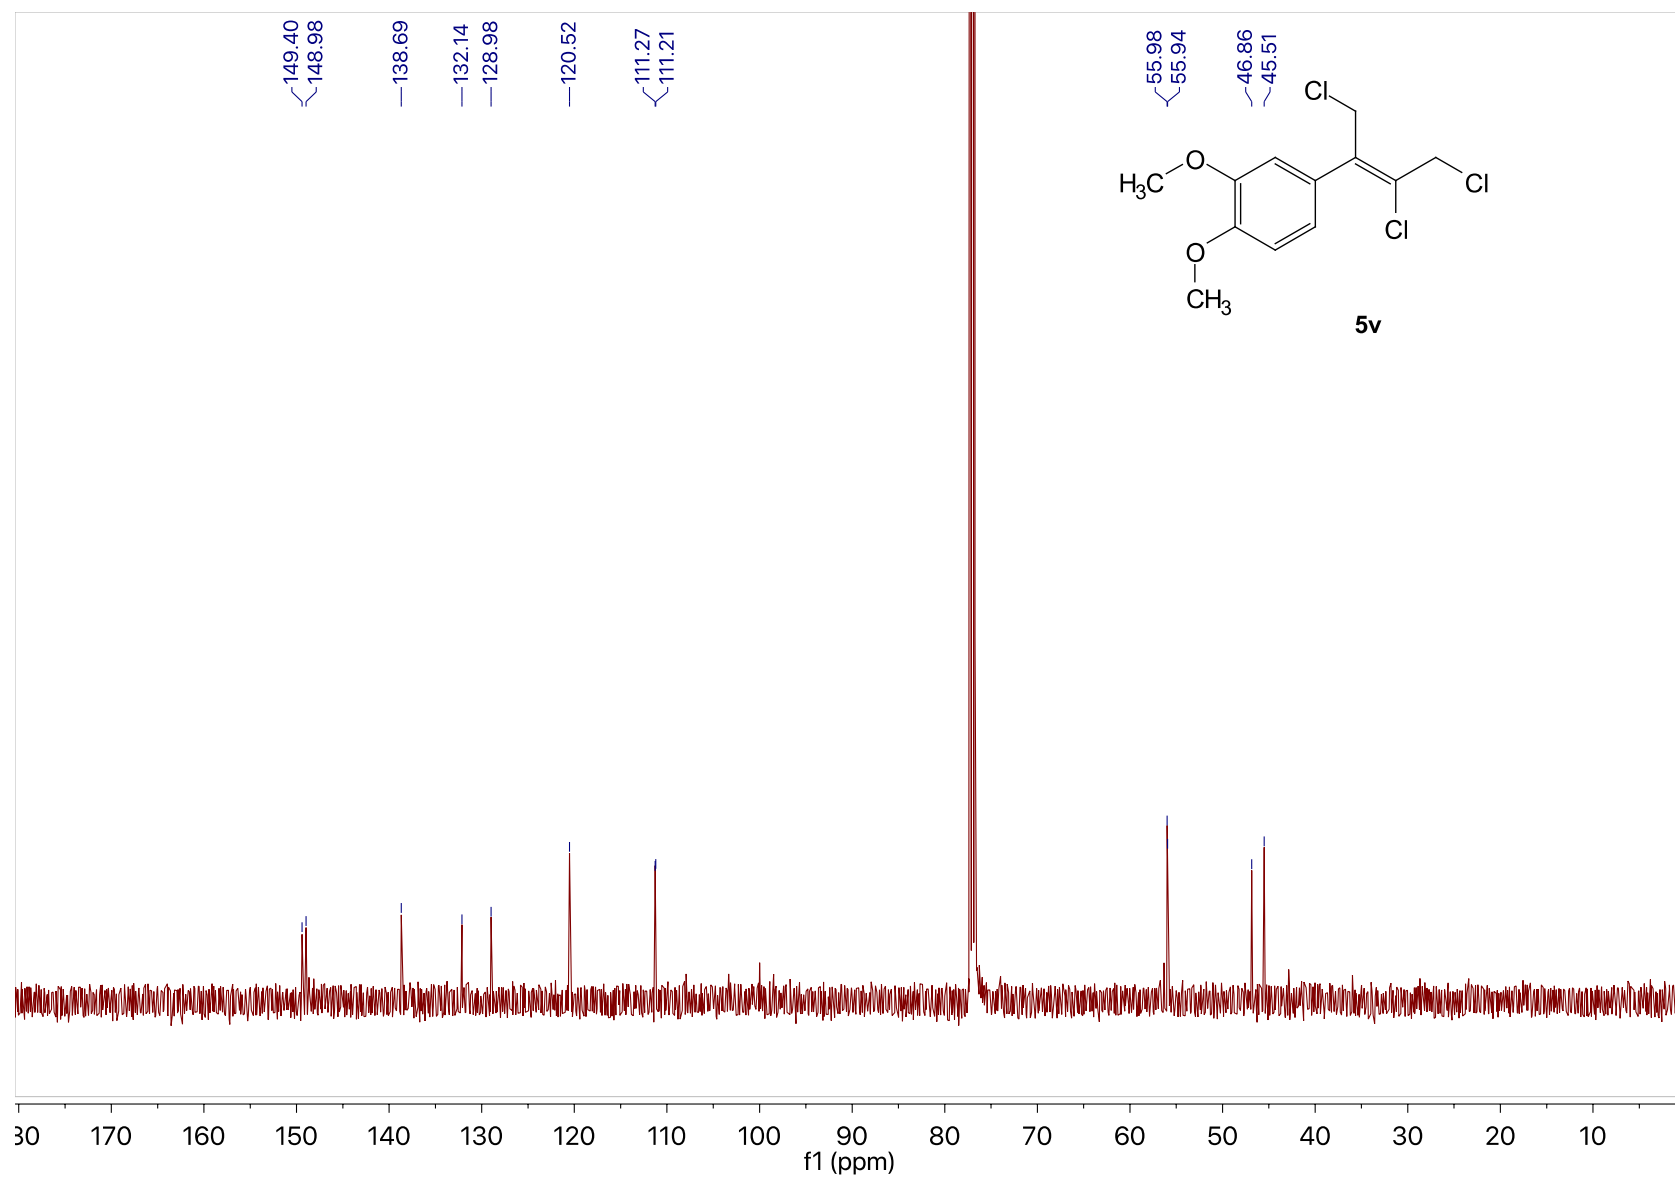

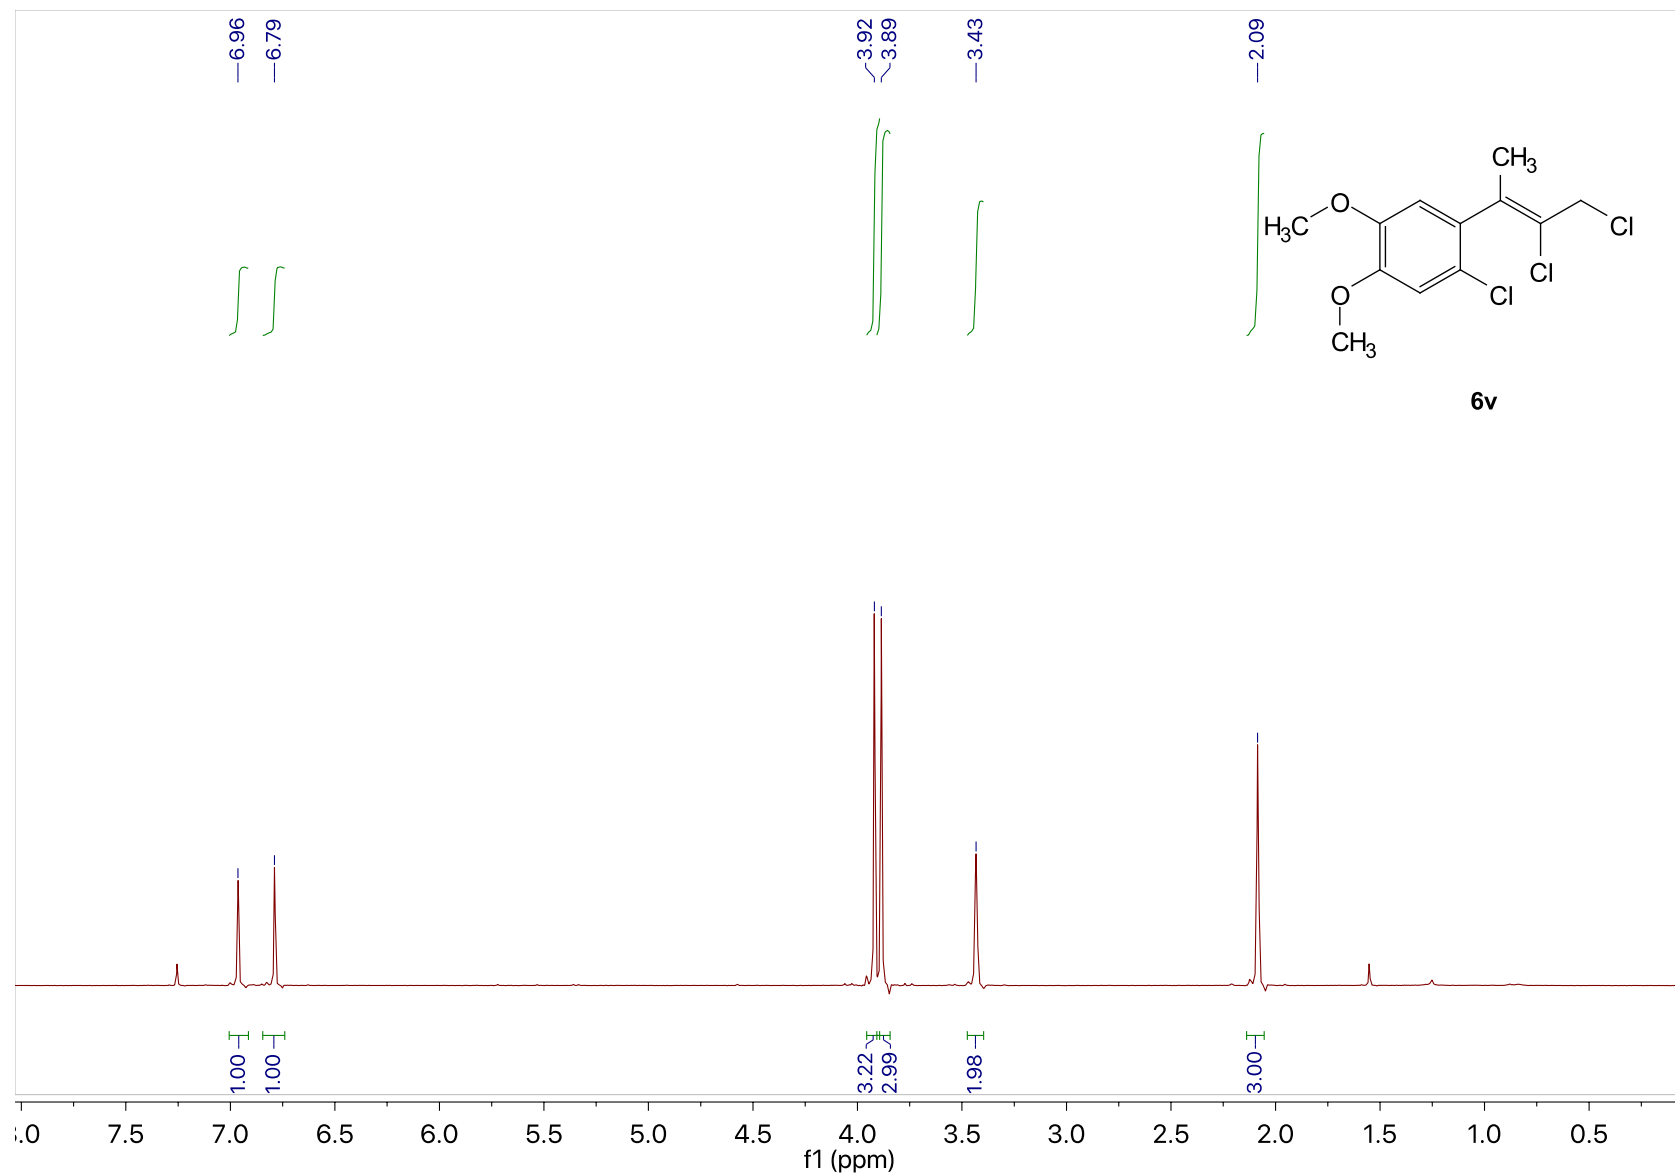



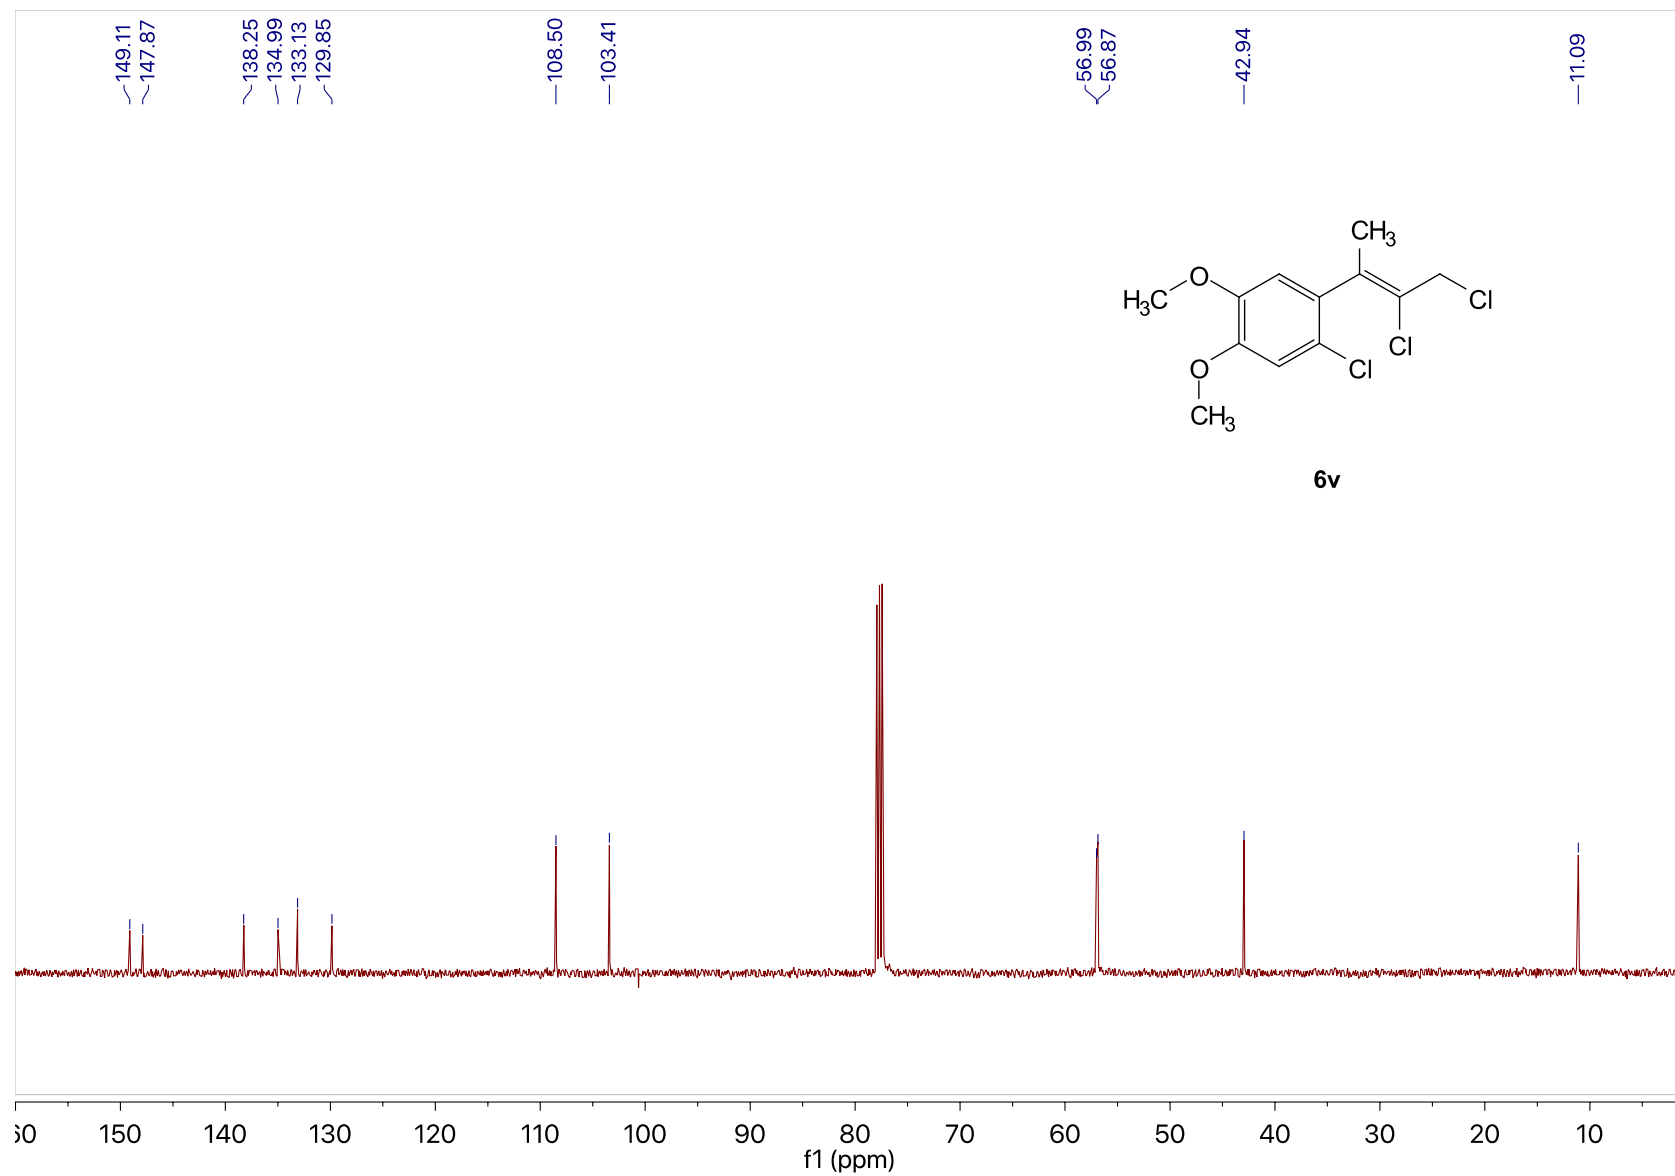

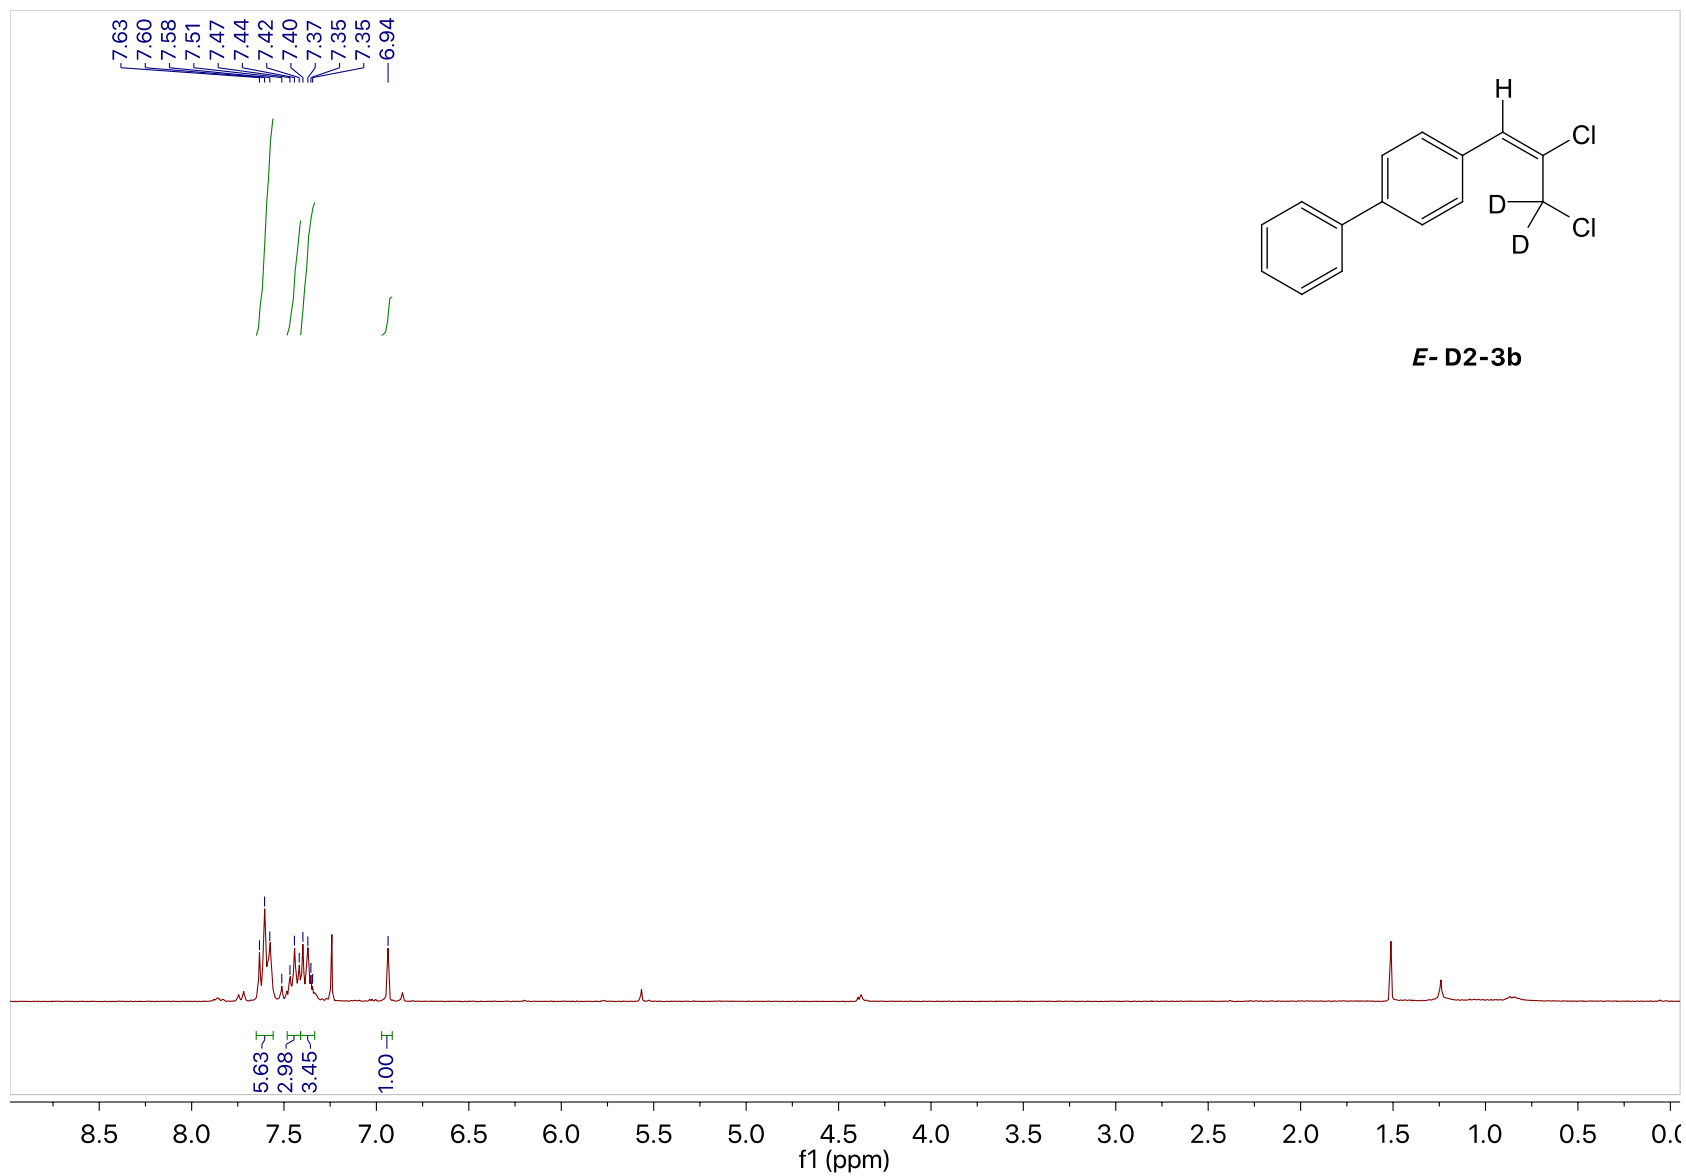

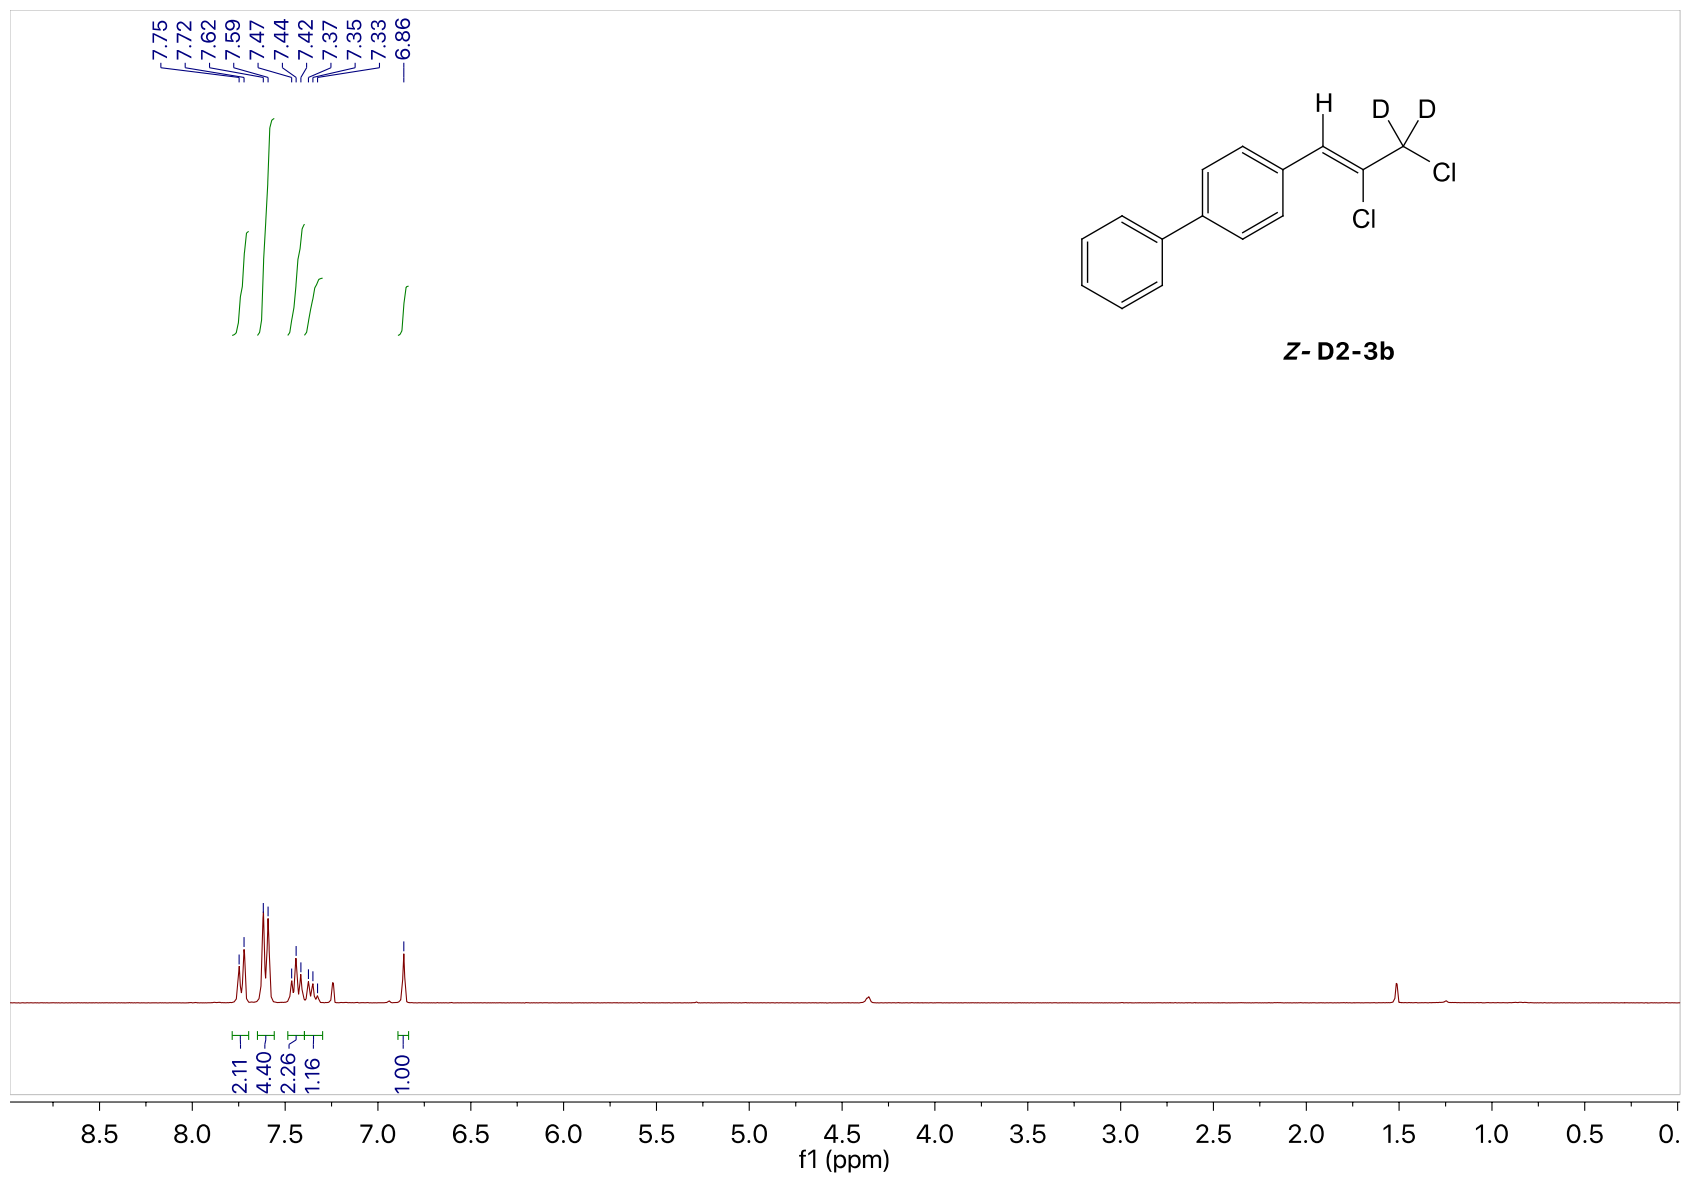

Supplement: Additional file 1 [file 1860-5397-14-67-S1.pdf]
